# Supplementary material for: Establishing the main determinants of the environmental safety of catalytic fine chemical synthesis with catalytic cross-coupling reactions
Source: Royal Society of Chemistry journal article supplement (doi:10.1039/d3gc04572b), 2024-01-01
Supplement: d3gc04572b1.pdf [file d3gc04572b1.pdf]

# Establishing the main determinants of the environmental safety of catalytic fine chemical synthesis with catalytic cross-coupling reactions

Ksenia S. Egorova<sup>a,\*</sup>, Andrey E. Kolesnikov<sup>a</sup>, Alexandra V. Posvyatenko<sup>a,b</sup>, Alexey S. Galushko<sup>a</sup>,  
Ruslan R. Shaydullin<sup>a</sup>, and Valentine P. Ananikov<sup>a,\*</sup>

<sup>a</sup> Zelinsky Institute of Organic Chemistry, Russian Academy of Sciences, Moscow 119991, Russia;  
<https://AnanikovLab.ru>

<sup>b</sup> Dmitry Rogachev National Medical Research Center of Pediatric Hematology, Oncology and Immunology, Ministry of Health of Russian Federation, Moscow 117198, Russia

\* E-mail addresses: egorova-ks@ioc.ac.ru, val@ioc.ac.ru

## Supporting Information

### Contents

|                                                                                                                                                                               |    |
|-------------------------------------------------------------------------------------------------------------------------------------------------------------------------------|----|
| Table S1. Experimental data for Sonogashira reactions used in this work.....                                                                                                  | 4  |
| Table S2. Experimental data for Mizoroki-Heck reactions used in this work.....                                                                                                | 6  |
| Table S3. bio-Factors and cytotoxicity potentials for synthesis of diphenylacetylene.....                                                                                     | 8  |
| Table S4. bio-Factors and cytotoxicity potentials for synthesis of 1-nitro-4-(phenylethynyl)benzene..                                                                         | 13 |
| Table S5. bio-Factors and cytotoxicity potentials for synthesis of 1-nitro-3-((4-nitrophenyl)ethynyl)benzene .....                                                            | 18 |
| Table S6. bio-Factors and cytotoxicity potentials for synthesis of 1-((4-methoxyphenyl)ethynyl)-3-nitrobenzene .....                                                          | 23 |
| Table S7. bio-Factors and cytotoxicity potentials for synthesis of ( <i>E</i> )-stilbene .....                                                                                | 26 |
| Table S8. bio-Factors and cytotoxicity potentials for synthesis of ( <i>E</i> )-4-nitrostilbene .....                                                                         | 27 |
| Table S9. bio-Factors and cytotoxicity potentials for synthesis of ( <i>E</i> )-4-chlorostilbene.....                                                                         | 28 |
| Table S10. bio-Factors and cytotoxicity potentials for synthesis of ( <i>E</i> )-4-chloro-4'-nitrostilbene .....                                                              | 29 |
| Table S11. bio-Factors and cytotoxicity potentials for synthesis of ( <i>E</i> )-4-fluoro-4'-nitrostilbene .....                                                              | 30 |
| Table S12. bio-Factors and cytotoxicity potentials for synthesis of ( <i>E</i> )-4-methoxystilbene.....                                                                       | 31 |
| Table S13. Dependence of $CP_f$ and $CP_{f\_rel}$ on the Pd : Cu ratio during the reaction period by example of synthesis of diphenylacetylene measured in CaCo-2 cells ..... | 32 |
| Table S14. Dependence of $CP_f$ and $CP_{f\_rel}$ on the Pd : Cu ratio during the reaction period by example of synthesis of diphenylacetylene measured in FRSN cells.....    | 33 |

|                                                                                                                                                                                |    |
|--------------------------------------------------------------------------------------------------------------------------------------------------------------------------------|----|
| Table S15. Dependence of $CP_f$ and $CP_{f\_rel}$ on the Pd : Cu ratio during the reaction period by example of synthesis of diphenylacetylene measured in HEK293T cells ..... | 34 |
| Fig. S1. bio-Strips of 36 synthetic routes for ( <i>E</i> )-stilbene (based on 24-h $CC_{50}$ values measured in CaCo-2 cells).....                                            | 35 |
| Fig. S2. bio-Strips of 36 synthetic routes for ( <i>E</i> )-stilbene (based on 24-h $CC_{50}$ values measured in FRSN cells) .....                                             | 36 |
| Fig. S3. bio-Strips of 36 synthetic routes for ( <i>E</i> )-stilbene (based on 24-h $CC_{50}$ values measured in HEK293T cells) .....                                          | 37 |
| Fig. S4. bio-Strips of 36 synthetic routes for ( <i>E</i> )-4-nitrostilbene (based on 24-h $CC_{50}$ values measured in CaCo-2 cells) .....                                    | 38 |
| Fig. S5. bio-Strips of 36 synthetic routes for ( <i>E</i> )-4-nitrostilbene (based on 24-h $CC_{50}$ values measured in FRSN cells).....                                       | 39 |
| Fig. S6. bio-Strips of 36 synthetic routes for ( <i>E</i> )-4-nitrostilbene (based on 24-h $CC_{50}$ values measured in HEK293T cells) .....                                   | 40 |
| Fig. S7. bio-Strips of 36 synthetic routes for ( <i>E</i> )-4-chlorostilbene (based on 24-h $CC_{50}$ values measured in CaCo-2 cells) .....                                   | 41 |
| Fig. S8. bio-Strips of 36 synthetic routes for ( <i>E</i> )-4-chlorostilbene (based on 24-h $CC_{50}$ values measured in FRSN cells).....                                      | 42 |
| Fig. S9. bio-Strips of 36 synthetic routes for ( <i>E</i> )-4-chlorostilbene (based on 24-h $CC_{50}$ values measured in HEK293T cells) .....                                  | 43 |
| Fig. S10. bio-Strips of 36 synthetic routes for ( <i>E</i> )-4-chloro-4'-nitrostilbene (based on 24-h $CC_{50}$ values measured in CaCo-2 cells) .....                         | 44 |
| Fig. S11. bio-Strips of 36 synthetic routes for ( <i>E</i> )-4-chloro-4'-nitrostilbene (based on 24-h $CC_{50}$ values measured in FRSN cells).....                            | 45 |
| Fig. S12. bio-Strips of 36 synthetic routes for ( <i>E</i> )-4-chloro-4'-nitrostilbene (based on 24-h $CC_{50}$ values measured in HEK293T cells).....                         | 46 |
| Fig. S13. bio-Strips of 36 synthetic routes for ( <i>E</i> )-4-fluoro-4'-nitrostilbene (based on 24-h $CC_{50}$ values measured in CaCo-2 cells) .....                         | 47 |
| Fig. S14. bio-Strips of 36 synthetic routes for ( <i>E</i> )-4-fluoro-4'-nitrostilbene (based on 24-h $CC_{50}$ values measured in FRSN cells).....                            | 48 |
| Fig. S15. bio-Strips of 36 synthetic routes for ( <i>E</i> )-4-fluoro-4'-nitrostilbene (based on 24-h $CC_{50}$ values measured in HEK293T cells).....                         | 49 |
| Fig. S16. bio-Strips of 24 synthetic routes for ( <i>E</i> )-4-methoxystilbene (based on 24-h $CC_{50}$ values measured in CaCo-2 cells) .....                                 | 50 |
| Fig. S17. bio-Strips of 24 synthetic routes for ( <i>E</i> )-4-methoxystilbene (based on 24-h $CC_{50}$ values measured in FRSN cells).....                                    | 51 |
| Fig. S18. bio-Strips of 24 synthetic routes for ( <i>E</i> )-4-methoxystilbene (based on 24-h $CC_{50}$ values measured in HEK293T cells).....                                 | 52 |
| Fig. S19. Cytotoxicity potentials (CPs) of 32 routes of synthesis of ( <i>E</i> )-stilbene .....                                                                               | 53 |
| Fig. S20. Cytotoxicity potentials (CPs) of 32 routes of synthesis of ( <i>E</i> )-4-nitrostilbene .....                                                                        | 54 |

|                                                                                                                                                                                                                                                                                                    |    |
|----------------------------------------------------------------------------------------------------------------------------------------------------------------------------------------------------------------------------------------------------------------------------------------------------|----|
| Fig. S21. Cytotoxicity potentials (CPs) of 32 routes of synthesis of ( <i>E</i> )-4-chlorostilbene.....                                                                                                                                                                                            | 55 |
| Fig. S22. Cytotoxicity potentials (CPs) of 32 routes of synthesis of ( <i>E</i> )-4-chloro-4'-nitrostilbene .....                                                                                                                                                                                  | 56 |
| Fig. S23. Cytotoxicity potentials (CPs) of 32 routes of synthesis of ( <i>E</i> )-4-fluoro-4'-nitrostilbene .....                                                                                                                                                                                  | 57 |
| Fig. S24. Cytotoxicity potentials (CPs) of 24 routes of synthesis of ( <i>E</i> )-4-methoxystilbene.....                                                                                                                                                                                           | 58 |
| Fig. S25. Dependence of (a) $CP_f$ and (b) $CP_{f\_rel}$ on the Pd : Cu ratio during the reaction period by example of synthesis of diphenylacetylene from phenylacetylene and bromobenzene using $Pd(OAc)_2$ and CuI as catalysts and $Et_3N$ as a base in DMF as measured in FRSN cells .....    | 59 |
| Fig. S26. Dependence of (a) $CP_f$ and (b) $CP_{f\_rel}$ on the Pd : Cu ratio during the reaction period by example of synthesis of diphenylacetylene from phenylacetylene and bromobenzene using $Pd(OAc)_2$ and CuI as catalysts and $Et_3N$ as a base in DMF as measured in HEK293T cells ..... | 60 |
| Fig. S27. Comparison of the cytotoxicity of the substances employed in the Mizoroki-Heck reactions in CaCo-2, HEK293T, and FRSN cell lines .....                                                                                                                                                   | 61 |

**Table S1.** Experimental data for Sonogashira reactions used in this work.

| Substance                                 | Mw,<br>g·mol <sup>-1</sup> | Amount in<br>reaction,<br>mmol <sup>a</sup> | 24-h CC <sub>50</sub> , mM <sup>b</sup> |                           |                           |
|-------------------------------------------|----------------------------|---------------------------------------------|-----------------------------------------|---------------------------|---------------------------|
|                                           |                            |                                             | CaCo-2                                  | FRSN                      | HEK293T                   |
| <i>Starting materials</i>                 |                            |                                             |                                         |                           |                           |
| Phenylacetylene                           | 102.14                     | 1.00                                        | 13.907 (11.268-16.545)                  | 19.513 (11.123-27.902)    | 28.960 (18.033-39.887)    |
| 1-Ethynyl-3-nitrobenzene                  | 147.13                     | 1.00                                        | 2.492 (0.798-4.186)                     | 5.524 (2.102-8.946)       | 4.441 (2.164-6.718)       |
| Iodobenzene                               | 204.01                     | 1.00                                        | 3.349 (1.595-5.104)                     | 3.333 (1.915-4.750)       | 9.543 (6.517-12.568)      |
| Bromobenzene                              | 157.01                     | 1.00                                        | 5.546 (4.449-6.643)                     | 4.803 (1.874-7.732)       | 17.497 (12.613-22.380)    |
| Chlorobenzene                             | 112.55                     | 1.00                                        | 8.274 (7.014-9.533)                     | 6.300 (1.317-11.284)      | 36.047 (30.006-42.087)    |
| 1-Iodo-4-nitrobenzene                     | 249.01                     | 1.00                                        | >20 <sup>c</sup>                        | >20 <sup>c</sup>          | >35 <sup>c</sup>          |
| 1-Bromo-4-nitrobenzene                    | 202.01                     | 1.00                                        | >2 <sup>c</sup>                         | >10 <sup>c</sup>          | >4 <sup>c</sup>           |
| 1-Chloro-4-nitrobenzene                   | 157.55                     | 1.00                                        | >16 <sup>c</sup>                        | 11.846 (3.789-19.904)     | >33 <sup>c</sup>          |
| 1-Iodo-4-methoxybenzene                   | 234.04                     | 1.00                                        | 23.464 (15.107-31.821)                  | 11.793 (10.574-13.013)    | 34.293 (27.562-41.023)    |
| 1-Bromo-4-methoxybenzene                  | 187.04                     | 1.00                                        | 7.915 (4.567-11.263)                    | 6.500 (2.858-10.143)      | 24.195 (13.868-34.522)    |
| <i>Catalysts</i>                          |                            |                                             |                                         |                           |                           |
| Pd(OAc) <sub>2</sub>                      | 224.50                     | 0.01                                        | 1.035 (0.421-1.650)                     | 0.709 (0.510-0.908)       | 1.096 (0.640-1.553)       |
| PdCl <sub>2</sub>                         | 177.33                     | 0.01                                        | 0.698 (0.522-0.875)                     | 0.385 (0.305-0.465)       | 0.724 (0.347-1.102)       |
| Pd(acac) <sub>2</sub>                     | 304.64                     | 0.01                                        | 0.037 (0.026-0.049)                     | 0.007 (0.005-0.009)       | 0.014 (0.009-0.019)       |
| CuI                                       | 190.45                     | 0.01                                        | 0.479 (0.237-0.722)                     | 0.306 (0.140-0.472)       | 0.623 (0.397-0.850)       |
| CuBr                                      | 143.45                     | 0.01                                        | 0.197 (0.134-0.260)                     | 0.164 (0.093-0.235)       | 0.195 (0.165-0.225)       |
| <i>Reagents</i>                           |                            |                                             |                                         |                           |                           |
| Et <sub>3</sub> N                         | 101.19                     | 1.00                                        | 29.270 (17.623-40.917)                  | 119.525 (103.494-135.556) | 38.997 (30.689-47.304)    |
| Et <sub>2</sub> NH                        | 73.138                     | 1.00                                        | 13.785 (3.492-24.077)                   | 23.963 (18.375-29.552)    | 11.255 (1.261-21.249)     |
| <i>Solvents</i>                           |                            |                                             |                                         |                           |                           |
| DMF                                       | 73.09                      | 25.83 (12.92) <sup>d</sup>                  | >35 <sup>c</sup>                        | >34 <sup>c</sup>          | >139 <sup>c</sup>         |
| NMP                                       | 99.13                      | 20.78 (10.39) <sup>d</sup>                  | 144.300 (108.218-180.382)               | 118.167 (86.989-149.345)  | 192.500 (161.918-223.082) |
| H <sub>2</sub> O                          | 18.02                      | 110.80 (55.40) <sup>d</sup>                 | >11000 <sup>e</sup>                     | >11000 <sup>e</sup>       | >11000 <sup>e</sup>       |
| <i>Products</i>                           |                            |                                             |                                         |                           |                           |
| Diphenylacetylene                         | 178.23                     | 1.00                                        | >11 <sup>c</sup>                        | 19.790 (10.992-28.588)    | >24 <sup>c</sup>          |
| 1-Nitro-4-(phenylethynyl)benzene          | 223.23                     | 1.00                                        | >10 <sup>c</sup>                        | >11 <sup>c</sup>          | >10 <sup>c</sup>          |
| 1-Nitro-3-((4-nitrophenyl)ethynyl)benzene | 268.23                     | 1.00                                        | 10.101 (6.978-13.224)                   | 0.535 (0.169-0.902)       | 11.360 (10.679-12.041)    |
| 1-((4-Methoxyphenyl)ethynyl)-3-           | 253.26                     | 1.00                                        | 5.150 (1.163-9.136)                     | 9.493 (4.860-14.127)      | 2.317 (1.175-3.459)       |

|                        |         |      |                        |                        |                         |
|------------------------|---------|------|------------------------|------------------------|-------------------------|
| nitrobenzene           |         |      |                        |                        |                         |
| <i>Byproducts</i>      |         |      |                        |                        |                         |
| Et <sub>3</sub> N·HI   | 229.104 | 1.00 | 17.823 (12.807-2.839)  | 55.937 (40.497-71.376) | 56.670 (42.050-71.290)  |
| Et <sub>3</sub> N·HBr  | 182.104 | 1.00 | 27.290 (14.732-39.848) | 53.413 (51.322-55.505) | 72.057 (61.478-82.636)  |
| Et <sub>3</sub> N·HCl  | 137.6   | 1.00 | >19 <sup>c</sup>       | >86 <sup>c</sup>       | >39 <sup>c</sup>        |
| Et <sub>2</sub> NH·HI  | 201.05  | 1.00 | 9.903 (6.404-13.401)   | 66.827 (60.219-73.434) | 87.748 (71.546-103.949) |
| Et <sub>2</sub> NH·HBr | 154.05  | 1.00 | 38.833 (27.087-50.580) | 42.133 (31.963-52.304) | >36 <sup>c</sup>        |
| Et <sub>2</sub> NH·HCl | 109.60  | 1.00 | >13 <sup>c</sup>       | >95 <sup>c</sup>       | 80.518 (70.500-90.535)  |

<sup>a</sup> 100% conversion is considered. For clarity, maximal possible amount of byproduct was used in calculations. <sup>b</sup> 95% confidence intervals are shown in parentheses. <sup>c</sup> The exact value could not be measured due to technical difficulties (insufficient solubility in the cultural media). <sup>d</sup> The amount in a 1 : 1 mixture with water (for DMF and NMP) or with DMF or NMP (for water) is provided in the parentheses. <sup>e</sup> Estimated in accordance with the maximal dilution of cultural media with deionized water that did not affect the viability of cells.

**Table S2.** Experimental data for Mizoroki-Heck reactions used in this work.

| Substance                     | Mw,<br>g·mol <sup>-1</sup> | Amount in<br>reaction,<br>mmol <sup>a</sup> | 24-h CC <sub>50</sub> , mM <sup>b</sup> |                           |                           |
|-------------------------------|----------------------------|---------------------------------------------|-----------------------------------------|---------------------------|---------------------------|
|                               |                            |                                             | CaCo-2                                  | FRSN                      | HEK293T                   |
| <i>Starting materials</i>     |                            |                                             |                                         |                           |                           |
| Styrene                       | 104.15                     | 1.00                                        | 10.416 (6.474-14.357)                   | 12.773 (8.254-17.292)     | 46.606 (17.818-75.394)    |
| 4-Chlorostyrene               | 138.59                     | 1.00                                        | 3.882 (2.711-5.052)                     | 2.007 (1.169-2.845)       | 12.073 (9.238-14.909)     |
| 4-Fluorostyrene               | 122.14                     | 1.00                                        | 4.961 (2.751-7.171)                     | 3.959 (1.003-6.914)       | 18.634 (8.087-29.181)     |
| Iodobenzene                   | 204.01                     | 1.00                                        | 3.349 (1.595-5.104)                     | 3.333 (1.915-4.750)       | 9.543 (6.517-12.568)      |
| Bromobenzene                  | 157.01                     | 1.00                                        | 5.546 (4.449-6.643)                     | 4.803 (1.874-7.732)       | 17.497 (12.613-22.380)    |
| Chlorobenzene                 | 112.55                     | 1.00                                        | 8.274 (7.014-9.533)                     | 6.300 (1.317-11.284)      | 36.047 (30.006-42.087)    |
| 1-Iodo-4-nitrobenzene         | 249.01                     | 1.00                                        | >20 <sup>c</sup>                        | >20 <sup>c</sup>          | >35 <sup>c</sup>          |
| 1-Bromo-4-nitrobenzene        | 202.01                     | 1.00                                        | >2 <sup>c</sup>                         | >10 <sup>c</sup>          | >4 <sup>c</sup>           |
| 1-Chloro-4-nitrobenzene       | 157.55                     | 1.00                                        | >16 <sup>c</sup>                        | 11.846 (3.789-19.904)     | >33 <sup>c</sup>          |
| 1-Iodo-4-methoxybenzene       | 234.04                     | 1.00                                        | 23.464 (15.107-31.821)                  | 11.793 (10.574-13.013)    | 34.293 (27.562-41.023)    |
| 1-Bromo-4-methoxybenzene      | 187.04                     | 1.00                                        | 7.915 (4.567-11.263)                    | 6.500 (2.858-10.143)      | 24.195 (13.868-34.522)    |
| <i>Catalysts</i>              |                            |                                             |                                         |                           |                           |
| Pd(OAc) <sub>2</sub>          | 224.50                     | 0.01                                        | 1.035 (0.421-1.650)                     | 0.709 (0.510-0.908)       | 1.096 (0.640-1.553)       |
| PdCl <sub>2</sub>             | 177.33                     | 0.01                                        | 0.698 (0.522-0.875)                     | 0.385 (0.305-0.465)       | 0.724 (0.347-1.102)       |
| Pd(acac) <sub>2</sub>         | 304.64                     | 0.01                                        | 0.037 (0.026-0.049)                     | 0.007 (0.005-0.009)       | 0.014 (0.009-0.019)       |
| <i>Reagents</i>               |                            |                                             |                                         |                           |                           |
| Et <sub>3</sub> N             | 101.19                     | 1.00                                        | 29.270 (17.623-40.917)                  | 119.525 (103.494-135.556) | 38.997 (30.689-47.304)    |
| Et <sub>2</sub> NH            | 73.138                     | 1.00                                        | 13.785 (3.492-24.077)                   | 23.963 (18.375-29.552)    | 11.255 (1.261-21.249)     |
| <i>Solvents</i>               |                            |                                             |                                         |                           |                           |
| DMF                           | 73.09                      | 25.83                                       | >35 <sup>c</sup>                        | >34 <sup>c</sup>          | >139 <sup>c</sup>         |
| NMP                           | 99.13                      | 20.78                                       | 144.300 (108.218-180.382)               | 118.167 (86.989-149.345)  | 192.500 (161.918-223.082) |
| <i>Products</i>               |                            |                                             |                                         |                           |                           |
| (E)-Stilbene                  | 180.25                     | 1.00                                        | >58 <sup>c</sup>                        | >33 <sup>c</sup>          | >58 <sup>c</sup>          |
| (E)-4-Nitrostilbene           | 225.25                     | 1.00                                        | >10 <sup>c</sup>                        | 22.287 (20.685-23.888)    | >9 <sup>c</sup>           |
| (E)-4-Chlorostilbene          | 214.69                     | 1.00                                        | 5.634 (2.796-8.473)                     | 2.336 (0.891-3.782)       | 8.409 (2.821-13.998)      |
| (E)-4-Chloro-4'-nitrostilbene | 259.69                     | 1.00                                        | >6 <sup>c</sup>                         | >13 <sup>c</sup>          | >13 <sup>c</sup>          |
| (E)-4-Fluoro-4'-nitrostilbene | 243.24                     | 1.00                                        | >2 <sup>c</sup>                         | 18.167 (15.695-20.638)    | >15 <sup>c</sup>          |
| (E)-4-Methoxystilbene         | 210.28                     | 1.00                                        | >34 <sup>c</sup>                        | 33.720 (26.234-41.206)    | >8 <sup>c</sup>           |
| <i>Byproducts</i>             |                            |                                             |                                         |                           |                           |
| Et <sub>3</sub> N·HI          | 229.104                    | 1.00                                        | 17.823 (12.807-2.839)                   | 55.937 (40.497-71.376)    | 56.670 (42.050-71.290)    |
| Et <sub>3</sub> N·HBr         | 182.104                    | 1.00                                        | 27.290 (14.732-39.848)                  | 53.413 (51.322-55.505)    | 72.057 (61.478-82.636)    |

|                        |        |      |                        |                        |                         |
|------------------------|--------|------|------------------------|------------------------|-------------------------|
| Et <sub>3</sub> N·HCl  | 137.6  | 1.00 | >19 <sup>c</sup>       | >86 <sup>c</sup>       | >39 <sup>c</sup>        |
| Et <sub>2</sub> NH·HI  | 201.05 | 1.00 | 9.903 (6.404-13.401)   | 66.827 (60.219-73.434) | 87.748 (71.546-103.949) |
| Et <sub>2</sub> NH·HBr | 154.05 | 1.00 | 38.833 (27.087-50.580) | 42.133 (31.963-52.304) | >36 <sup>c</sup>        |
| Et <sub>2</sub> NH·HCl | 109.60 | 1.00 | >13 <sup>c</sup>       | >95 <sup>c</sup>       | 80.518 (70.500-90.535)  |

<sup>a</sup> 100% conversion is considered. For clarity, maximal possible amount of byproduct was used in calculations. <sup>b</sup> 95% confidence intervals are shown in parentheses. <sup>c</sup> The exact value could not be measured due to technical difficulties (insufficient solubility in the cultural media).

**Table S3.** bio-Factors and cytotoxicity potentials for synthesis of diphenylacetylene.

| Reaction  | Starting materials (SM2) | Catalyst (CT1) PdA <sub>2</sub> | Catalyst (CT2) CuX | Reagent (R)        | Solvent (S)          | Byproduct (BP)        | CaCo-2 |                 |                 |                     | FRSN |                 |                 |                     | HEK293T |                 |                 |                     |
|-----------|--------------------------|---------------------------------|--------------------|--------------------|----------------------|-----------------------|--------|-----------------|-----------------|---------------------|------|-----------------|-----------------|---------------------|---------|-----------------|-----------------|---------------------|
|           |                          |                                 |                    |                    |                      |                       | BF     | CP <sub>i</sub> | CP <sub>f</sub> | CP <sub>f,rel</sub> | BF   | CP <sub>i</sub> | CP <sub>f</sub> | CP <sub>f,rel</sub> | BF      | CP <sub>i</sub> | CP <sub>f</sub> | CP <sub>f,rel</sub> |
| A-A-A-A-A | PhI                      | OAc                             | I                  | Et <sub>3</sub> N  | DMF                  | Et <sub>3</sub> N·HI  | 0.78   | 1.17            | 0.92            | 0.82                | 0.75 | 1.14            | 0.85            | 0.8                 | 0.89    | 0.93            | 0.82            | 0.78                |
| A-A-A-A-B | PhI                      | OAc                             | I                  | Et <sub>3</sub> N  | NMP                  | Et <sub>3</sub> N·HI  | 0.56   | 0.58            | 0.32            | 0.23                | 0.47 | 0.55            | 0.26            | 0.21                | 0.68    | 0.33            | 0.23            | 0.19                |
| A-A-A-A-C | PhI                      | OAc                             | I                  | Et <sub>3</sub> N  | H <sub>2</sub> O     | Et <sub>3</sub> N·HI  | 0.42   | 0.45            | 0.19            | 0.1                 | 0.3  | 0.42            | 0.13            | 0.07                | 0.47    | 0.2             | 0.09            | 0.05                |
| A-A-A-A-D | PhI                      | OAc                             | I                  | Et <sub>3</sub> N  | DMF/H <sub>2</sub> O | Et <sub>3</sub> N·HI  | 0.68   | 0.81            | 0.55            | 0.46                | 0.63 | 0.78            | 0.49            | 0.44                | 0.81    | 0.56            | 0.46            | 0.42                |
| A-A-A-A-E | PhI                      | OAc                             | I                  | Et <sub>3</sub> N  | NMP/H <sub>2</sub> O | Et <sub>3</sub> N·HI  | 0.5    | 0.51            | 0.25            | 0.16                | 0.4  | 0.48            | 0.19            | 0.14                | 0.6     | 0.27            | 0.16            | 0.12                |
| A-A-A-B-A | PhI                      | OAc                             | I                  | Et <sub>2</sub> NH | DMF                  | Et <sub>2</sub> NH·HI | 0.52   | 1.86            | 0.96            | 0.87                | 0.55 | 1.55            | 0.85            | 0.8                 | 0.46    | 1.79            | 0.82            | 0.77                |
| A-A-A-B-B | PhI                      | OAc                             | I                  | Et <sub>2</sub> NH | NMP                  | Et <sub>2</sub> NH·HI | 0.29   | 1.27            | 0.37            | 0.28                | 0.27 | 0.96            | 0.26            | 0.21                | 0.19    | 1.2             | 0.22            | 0.18                |
| A-A-A-B-C | PhI                      | OAc                             | I                  | Et <sub>2</sub> NH | H <sub>2</sub> O     | Et <sub>2</sub> NH·HI | 0.2    | 1.14            | 0.23            | 0.14                | 0.15 | 0.83            | 0.12            | 0.07                | 0.08    | 1.06            | 0.09            | 0.05                |
| A-A-A-B-D | PhI                      | OAc                             | I                  | Et <sub>2</sub> NH | DMF/H <sub>2</sub> O | Et <sub>2</sub> NH·HI | 0.4    | 1.5             | 0.6             | 0.51                | 0.41 | 1.19            | 0.49            | 0.44                | 0.32    | 1.43            | 0.45            | 0.41                |
| A-A-A-B-E | PhI                      | OAc                             | I                  | Et <sub>2</sub> NH | NMP/H <sub>2</sub> O | Et <sub>2</sub> NH·HI | 0.25   | 1.2             | 0.3             | 0.21                | 0.21 | 0.89            | 0.19            | 0.14                | 0.14    | 1.13            | 0.16            | 0.11                |
| A-A-B-A-A | PhI                      | OAc                             | Br                 | Et <sub>3</sub> N  | DMF                  | Et <sub>3</sub> N·HI  | 0.79   | 1.2             | 0.95            | 0.85                | 0.75 | 1.17            | 0.88            | 0.83                | 0.89    | 0.96            | 0.86            | 0.82                |
| A-A-B-A-B | PhI                      | OAc                             | Br                 | Et <sub>3</sub> N  | NMP                  | Et <sub>3</sub> N·HI  | 0.58   | 0.61            | 0.35            | 0.26                | 0.5  | 0.58            | 0.29            | 0.24                | 0.71    | 0.37            | 0.26            | 0.22                |
| A-A-B-A-C | PhI                      | OAc                             | Br                 | Et <sub>3</sub> N  | H <sub>2</sub> O     | Et <sub>3</sub> N·HI  | 0.46   | 0.48            | 0.22            | 0.13                | 0.35 | 0.44            | 0.15            | 0.1                 | 0.55    | 0.24            | 0.13            | 0.09                |
| A-A-B-A-D | PhI                      | OAc                             | Br                 | Et <sub>3</sub> N  | DMF/H <sub>2</sub> O | Et <sub>3</sub> N·HI  | 0.69   | 0.84            | 0.58            | 0.49                | 0.64 | 0.81            | 0.52            | 0.47                | 0.82    | 0.6             | 0.49            | 0.45                |
| A-A-B-A-E | PhI                      | OAc                             | Br                 | Et <sub>3</sub> N  | NMP/H <sub>2</sub> O | Et <sub>3</sub> N·HI  | 0.52   | 0.54            | 0.28            | 0.19                | 0.43 | 0.51            | 0.22            | 0.17                | 0.65    | 0.3             | 0.2             | 0.16                |
| A-A-B-B-A | PhI                      | OAc                             | Br                 | Et <sub>2</sub> NH | DMF                  | Et <sub>2</sub> NH·HI | 0.52   | 1.89            | 0.99            | 0.9                 | 0.56 | 1.58            | 0.88            | 0.83                | 0.47    | 1.83            | 0.85            | 0.81                |
| A-A-B-B-B | PhI                      | OAc                             | Br                 | Et <sub>2</sub> NH | NMP                  | Et <sub>2</sub> NH·HI | 0.3    | 1.3             | 0.4             | 0.31                | 0.29 | 0.99            | 0.28            | 0.23                | 0.21    | 1.23            | 0.26            | 0.22                |
| A-A-B-B-C | PhI                      | OAc                             | Br                 | Et <sub>2</sub> NH | H <sub>2</sub> O     | Et <sub>2</sub> NH·HI | 0.22   | 1.17            | 0.26            | 0.17                | 0.18 | 0.85            | 0.15            | 0.1                 | 0.11    | 1.1             | 0.12            | 0.08                |
| A-A-B-B-D | PhI                      | OAc                             | Br                 | Et <sub>2</sub> NH | DMF/H <sub>2</sub> O | Et <sub>2</sub> NH·HI | 0.41   | 1.53            | 0.63            | 0.54                | 0.42 | 1.22            | 0.51            | 0.46                | 0.33    | 1.46            | 0.49            | 0.45                |
| A-A-B-B-E | PhI                      | OAc                             | Br                 | Et <sub>2</sub> NH | NMP/H <sub>2</sub> O | Et <sub>2</sub> NH·HI | 0.27   | 1.23            | 0.33            | 0.24                | 0.24 | 0.92            | 0.22            | 0.17                | 0.16    | 1.17            | 0.19            | 0.15                |
| A-B-A-A-A | PhI                      | Cl                              | I                  | Et <sub>3</sub> N  | DMF                  | Et <sub>3</sub> N·HI  | 0.78   | 1.18            | 0.92            | 0.83                | 0.75 | 1.16            | 0.87            | 0.81                | 0.89    | 0.93            | 0.83            | 0.79                |
| A-B-A-A-B | PhI                      | Cl                              | I                  | Et <sub>3</sub> N  | NMP                  | Et <sub>3</sub> N·HI  | 0.56   | 0.58            | 0.33            | 0.24                | 0.48 | 0.56            | 0.27            | 0.22                | 0.69    | 0.34            | 0.23            | 0.19                |
| A-B-A-A-C | PhI                      | Cl                              | I                  | Et <sub>3</sub> N  | H <sub>2</sub> O     | Et <sub>3</sub> N·HI  | 0.43   | 0.45            | 0.19            | 0.1                 | 0.32 | 0.43            | 0.14            | 0.09                | 0.48    | 0.2             | 0.1             | 0.06                |
| A-B-A-A-D | PhI                      | Cl                              | I                  | Et <sub>3</sub> N  | DMF/H <sub>2</sub> O | Et <sub>3</sub> N·HI  | 0.68   | 0.81            | 0.56            | 0.47                | 0.63 | 0.79            | 0.5             | 0.45                | 0.81    | 0.57            | 0.46            | 0.42                |
| A-B-A-A-E | PhI                      | Cl                              | I                  | Et <sub>3</sub> N  | NMP/H <sub>2</sub> O | Et <sub>3</sub> N·HI  | 0.5    | 0.52            | 0.26            | 0.17                | 0.41 | 0.5             | 0.2             | 0.15                | 0.61    | 0.27            | 0.17            | 0.12                |
| A-B-A-B-A | PhI                      | Cl                              | I                  | Et <sub>2</sub> NH | DMF                  | Et <sub>2</sub> NH·HI | 0.52   | 1.87            | 0.97            | 0.87                | 0.55 | 1.57            | 0.86            | 0.81                | 0.46    | 1.8             | 0.82            | 0.78                |
| A-B-A-B-B | PhI                      | Cl                              | I                  | Et <sub>2</sub> NH | NMP                  | Et <sub>2</sub> NH·HI | 0.29   | 1.28            | 0.37            | 0.28                | 0.28 | 0.97            | 0.27            | 0.22                | 0.19    | 1.2             | 0.23            | 0.19                |
| A-B-A-B-C | PhI                      | Cl                              | I                  | Et <sub>2</sub> NH | H <sub>2</sub> O     | Et <sub>2</sub> NH·HI | 0.21   | 1.14            | 0.24            | 0.15                | 0.16 | 0.84            | 0.13            | 0.08                | 0.09    | 1.07            | 0.09            | 0.05                |
| A-B-A-B-D | PhI                      | Cl                              | I                  | Et <sub>2</sub> NH | DMF/H <sub>2</sub> O | Et <sub>2</sub> NH·HI | 0.4    | 1.51            | 0.6             | 0.51                | 0.41 | 1.2             | 0.5             | 0.45                | 0.32    | 1.43            | 0.46            | 0.42                |
| A-B-A-B-E | PhI                      | Cl                              | I                  | Et <sub>2</sub> NH | NMP/H <sub>2</sub> O | Et <sub>2</sub> NH·HI | 0.25   | 1.21            | 0.3             | 0.21                | 0.22 | 0.9             | 0.2             | 0.15                | 0.14    | 1.13            | 0.16            | 0.12                |
| A-B-B-A-A | PhI                      | Cl                              | Br                 | Et <sub>3</sub> N  | DMF                  | Et <sub>3</sub> N·HI  | 0.79   | 1.21            | 0.95            | 0.86                | 0.75 | 1.18            | 0.89            | 0.84                | 0.89    | 0.97            | 0.86            | 0.82                |
| A-B-B-A-B | PhI                      | Cl                              | Br                 | Et <sub>3</sub> N  | NMP                  | Et <sub>3</sub> N·HI  | 0.58   | 0.61            | 0.36            | 0.27                | 0.51 | 0.59            | 0.3             | 0.25                | 0.72    | 0.37            | 0.27            | 0.23                |
| A-B-B-A-C | PhI                      | Cl                              | Br                 | Et <sub>3</sub> N  | H <sub>2</sub> O     | Et <sub>3</sub> N·HI  | 0.46   | 0.48            | 0.22            | 0.13                | 0.36 | 0.46            | 0.17            | 0.11                | 0.56    | 0.24            | 0.13            | 0.09                |
| A-B-B-A-D | PhI                      | Cl                              | Br                 | Et <sub>3</sub> N  | DMF/H <sub>2</sub> O | Et <sub>3</sub> N·HI  | 0.69   | 0.84            | 0.59            | 0.5                 | 0.65 | 0.82            | 0.53            | 0.48                | 0.83    | 0.6             | 0.5             | 0.46                |
| A-B-B-A-E | PhI                      | Cl                              | Br                 | Et <sub>3</sub> N  | NMP/H <sub>2</sub> O | Et <sub>3</sub> N·HI  | 0.53   | 0.55            | 0.29            | 0.2                 | 0.44 | 0.52            | 0.23            | 0.18                | 0.66    | 0.31            | 0.2             | 0.16                |
| A-B-B-B-A | PhI                      | Cl                              | Br                 | Et <sub>2</sub> NH | DMF                  | Et <sub>2</sub> NH·HI | 0.52   | 1.9             | 0.99            | 0.9                 | 0.56 | 1.59            | 0.89            | 0.84                | 0.47    | 1.83            | 0.86            | 0.81                |
| A-B-B-B-B | PhI                      | Cl                              | Br                 | Et <sub>2</sub> NH | NMP                  | Et <sub>2</sub> NH·HI | 0.31   | 1.31            | 0.4             | 0.31                | 0.3  | 1               | 0.3             | 0.25                | 0.21    | 1.24            | 0.26            | 0.22                |
| A-B-B-B-C | PhI                      | Cl                              | Br                 | Et <sub>2</sub> NH | H <sub>2</sub> O     | Et <sub>2</sub> NH·HI | 0.23   | 1.17            | 0.27            | 0.18                | 0.19 | 0.87            | 0.16            | 0.11                | 0.12    | 1.1             | 0.13            | 0.09                |
| A-B-B-B-D | PhI                      | Cl                              | Br                 | Et <sub>2</sub> NH | DMF/H <sub>2</sub> O | Et <sub>2</sub> NH·HI | 0.41   | 1.54            | 0.63            | 0.54                | 0.43 | 1.23            | 0.53            | 0.48                | 0.34    | 1.47            | 0.49            | 0.45                |
| A-B-B-B-E | PhI                      | Cl                              | Br                 | Et <sub>2</sub> NH | NMP/H <sub>2</sub> O | Et <sub>2</sub> NH·HI | 0.27   | 1.24            | 0.33            | 0.24                | 0.25 | 0.93            | 0.23            | 0.18                | 0.17    | 1.17            | 0.2             | 0.15                |
| A-C-A-A-A | PhI                      | acac                            | I                  | Et <sub>3</sub> N  | DMF                  | Et <sub>3</sub> N·HI  | 0.82   | 1.43            | 1.18            | 1.09                | 0.89 | 2.56            | 2.27            | 2.22                | 0.94    | 1.63            | 1.53            | 1.49                |



|           |      |      |    |                    |                      |                        |      |      |      |      |      |      |      |      |      |      |      |      |
|-----------|------|------|----|--------------------|----------------------|------------------------|------|------|------|------|------|------|------|------|------|------|------|------|
| A-C-A-A-B | PhI  | acac | I  | Et <sub>3</sub> N  | NMP                  | Et <sub>3</sub> N·HI   | 0.69 | 0.84 | 0.58 | 0.49 | 0.85 | 1.96 | 1.67 | 1.62 | 0.9  | 1.04 | 0.93 | 0.89 |
| A-C-A-A-C | PhI  | acac | I  | Et <sub>3</sub> N  | H <sub>2</sub> O     | Et <sub>3</sub> N·HI   | 0.63 | 0.71 | 0.45 | 0.36 | 0.84 | 1.83 | 1.54 | 1.49 | 0.88 | 0.91 | 0.8  | 0.76 |
| A-C-A-A-D | PhI  | acac | I  | Et <sub>3</sub> N  | DMF/H <sub>2</sub> O | Et <sub>3</sub> N·HI   | 0.76 | 1.07 | 0.81 | 0.72 | 0.87 | 2.19 | 1.9  | 1.85 | 0.92 | 1.27 | 1.16 | 1.12 |
| A-C-A-A-E | PhI  | acac | I  | Et <sub>3</sub> N  | NMP/H <sub>2</sub> O | Et <sub>3</sub> N·HI   | 0.67 | 0.77 | 0.52 | 0.42 | 0.85 | 1.9  | 1.61 | 1.56 | 0.89 | 0.97 | 0.87 | 0.83 |
| A-C-A-B-A | PhI  | acac | I  | Et <sub>2</sub> NH | DMF                  | Et <sub>2</sub> NH·HI  | 0.57 | 2.13 | 1.22 | 1.13 | 0.76 | 2.97 | 2.26 | 2.21 | 0.61 | 2.5  | 1.52 | 1.48 |
| A-C-A-B-B | PhI  | acac | I  | Et <sub>2</sub> NH | NMP                  | Et <sub>2</sub> NH·HI  | 0.41 | 1.53 | 0.63 | 0.54 | 0.7  | 2.37 | 1.67 | 1.62 | 0.49 | 1.9  | 0.93 | 0.89 |
| A-C-A-B-C | PhI  | acac | I  | Et <sub>2</sub> NH | H <sub>2</sub> O     | Et <sub>2</sub> NH·HI  | 0.35 | 1.4  | 0.49 | 0.4  | 0.69 | 2.24 | 1.54 | 1.49 | 0.45 | 1.77 | 0.79 | 0.75 |
| A-C-A-B-D | PhI  | acac | I  | Et <sub>2</sub> NH | DMF/H <sub>2</sub> O | Et <sub>2</sub> NH·HI  | 0.49 | 1.76 | 0.86 | 0.77 | 0.73 | 2.6  | 1.9  | 1.85 | 0.54 | 2.13 | 1.16 | 1.12 |
| A-C-A-B-E | PhI  | acac | I  | Et <sub>2</sub> NH | NMP/H <sub>2</sub> O | Et <sub>2</sub> NH·HI  | 0.38 | 1.46 | 0.56 | 0.47 | 0.7  | 2.31 | 1.6  | 1.55 | 0.47 | 1.84 | 0.86 | 0.82 |
| A-C-B-A-A | PhI  | acac | Br | Et <sub>3</sub> N  | DMF                  | Et <sub>3</sub> N·HI   | 0.82 | 1.46 | 1.21 | 1.12 | 0.89 | 2.59 | 2.3  | 2.25 | 0.94 | 1.67 | 1.56 | 1.52 |
| A-C-B-A-B | PhI  | acac | Br | Et <sub>3</sub> N  | NMP                  | Et <sub>3</sub> N·HI   | 0.7  | 0.87 | 0.61 | 0.52 | 0.85 | 1.99 | 1.7  | 1.65 | 0.9  | 1.07 | 0.97 | 0.93 |
| A-C-B-A-C | PhI  | acac | Br | Et <sub>3</sub> N  | H <sub>2</sub> O     | Et <sub>3</sub> N·HI   | 0.65 | 0.74 | 0.48 | 0.39 | 0.84 | 1.86 | 1.57 | 1.52 | 0.89 | 0.94 | 0.83 | 0.79 |
| A-C-B-A-D | PhI  | acac | Br | Et <sub>3</sub> N  | DMF/H <sub>2</sub> O | Et <sub>3</sub> N·HI   | 0.77 | 1.1  | 0.84 | 0.75 | 0.87 | 2.22 | 1.93 | 1.88 | 0.92 | 1.3  | 1.2  | 1.16 |
| A-C-B-A-E | PhI  | acac | Br | Et <sub>3</sub> N  | NMP/H <sub>2</sub> O | Et <sub>3</sub> N·HI   | 0.68 | 0.8  | 0.55 | 0.45 | 0.85 | 1.93 | 1.63 | 1.58 | 0.9  | 1.01 | 0.9  | 0.86 |
| A-C-B-B-A | PhI  | acac | Br | Et <sub>2</sub> NH | DMF                  | Et <sub>2</sub> NH·HI  | 0.58 | 2.15 | 1.25 | 1.16 | 0.77 | 3    | 2.29 | 2.24 | 0.61 | 2.53 | 1.56 | 1.51 |
| A-C-B-B-B | PhI  | acac | Br | Et <sub>2</sub> NH | NMP                  | Et <sub>2</sub> NH·HI  | 0.42 | 1.56 | 0.66 | 0.57 | 0.71 | 2.4  | 1.7  | 1.65 | 0.5  | 1.94 | 0.96 | 0.92 |
| A-C-B-B-C | PhI  | acac | Br | Et <sub>2</sub> NH | H <sub>2</sub> O     | Et <sub>2</sub> NH·HI  | 0.37 | 1.43 | 0.52 | 0.43 | 0.69 | 2.27 | 1.57 | 1.51 | 0.46 | 1.8  | 0.83 | 0.79 |
| A-C-B-B-D | PhI  | acac | Br | Et <sub>2</sub> NH | DMF/H <sub>2</sub> O | Et <sub>2</sub> NH·HI  | 0.5  | 1.79 | 0.89 | 0.8  | 0.73 | 2.63 | 1.93 | 1.88 | 0.55 | 2.17 | 1.19 | 1.15 |
| A-C-B-B-E | PhI  | acac | Br | Et <sub>2</sub> NH | NMP/H <sub>2</sub> O | Et <sub>2</sub> NH·HI  | 0.39 | 1.49 | 0.59 | 0.5  | 0.7  | 2.34 | 1.63 | 1.58 | 0.48 | 1.87 | 0.9  | 0.85 |
| B-A-A-A-A | PhBr | OAc  | I  | Et <sub>3</sub> N  | DMF                  | Et <sub>3</sub> N·HBr  | 0.85 | 1.05 | 0.9  | 0.81 | 0.81 | 1.05 | 0.85 | 0.8  | 0.93 | 0.88 | 0.82 | 0.78 |
| B-A-A-A-B | PhBr | OAc  | I  | Et <sub>3</sub> N  | NMP                  | Et <sub>3</sub> N·HBr  | 0.66 | 0.46 | 0.3  | 0.21 | 0.57 | 0.46 | 0.26 | 0.21 | 0.78 | 0.29 | 0.22 | 0.18 |
| B-A-A-A-C | PhBr | OAc  | I  | Et <sub>3</sub> N  | H <sub>2</sub> O     | Et <sub>3</sub> N·HBr  | 0.51 | 0.33 | 0.17 | 0.08 | 0.39 | 0.32 | 0.13 | 0.08 | 0.6  | 0.15 | 0.09 | 0.05 |
| B-A-A-A-D | PhBr | OAc  | I  | Et <sub>3</sub> N  | DMF/H <sub>2</sub> O | Et <sub>3</sub> N·HBr  | 0.77 | 0.69 | 0.53 | 0.44 | 0.71 | 0.69 | 0.49 | 0.44 | 0.88 | 0.52 | 0.45 | 0.41 |
| B-A-A-A-E | PhBr | OAc  | I  | Et <sub>3</sub> N  | NMP/H <sub>2</sub> O | Et <sub>3</sub> N·HBr  | 0.6  | 0.39 | 0.24 | 0.14 | 0.49 | 0.39 | 0.19 | 0.14 | 0.72 | 0.22 | 0.16 | 0.12 |
| B-A-A-B-A | PhBr | OAc  | I  | Et <sub>2</sub> NH | DMF                  | Et <sub>2</sub> NH·HBr | 0.51 | 1.75 | 0.89 | 0.79 | 0.59 | 1.46 | 0.86 | 0.81 | 0.48 | 1.74 | 0.83 | 0.79 |
| B-A-A-B-B | PhBr | OAc  | I  | Et <sub>2</sub> NH | NMP                  | Et <sub>2</sub> NH·HBr | 0.25 | 1.15 | 0.29 | 0.2  | 0.31 | 0.87 | 0.27 | 0.21 | 0.21 | 1.15 | 0.24 | 0.2  |
| B-A-A-B-C | PhBr | OAc  | I  | Et <sub>2</sub> NH | H <sub>2</sub> O     | Et <sub>2</sub> NH·HBr | 0.15 | 1.02 | 0.16 | 0.07 | 0.18 | 0.73 | 0.13 | 0.08 | 0.1  | 1.02 | 0.1  | 0.06 |
| B-A-A-B-D | PhBr | OAc  | I  | Et <sub>2</sub> NH | DMF/H <sub>2</sub> O | Et <sub>2</sub> NH·HBr | 0.38 | 1.38 | 0.52 | 0.43 | 0.45 | 1.1  | 0.5  | 0.44 | 0.34 | 1.38 | 0.47 | 0.43 |
| B-A-A-B-E | PhBr | OAc  | I  | Et <sub>2</sub> NH | NMP/H <sub>2</sub> O | Et <sub>2</sub> NH·HBr | 0.21 | 1.09 | 0.22 | 0.13 | 0.25 | 0.8  | 0.2  | 0.15 | 0.16 | 1.08 | 0.17 | 0.13 |
| B-A-B-A-A | PhBr | OAc  | Br | Et <sub>3</sub> N  | DMF                  | Et <sub>3</sub> N·HBr  | 0.85 | 1.08 | 0.93 | 0.84 | 0.82 | 1.08 | 0.88 | 0.83 | 0.93 | 0.92 | 0.85 | 0.81 |
| B-A-B-A-B | PhBr | OAc  | Br | Et <sub>3</sub> N  | NMP                  | Et <sub>3</sub> N·HBr  | 0.68 | 0.49 | 0.33 | 0.24 | 0.59 | 0.49 | 0.29 | 0.24 | 0.81 | 0.32 | 0.26 | 0.22 |
| B-A-B-A-C | PhBr | OAc  | Br | Et <sub>3</sub> N  | H <sub>2</sub> O     | Et <sub>3</sub> N·HBr  | 0.55 | 0.36 | 0.2  | 0.11 | 0.44 | 0.35 | 0.15 | 0.1  | 0.67 | 0.19 | 0.13 | 0.08 |
| B-A-B-A-D | PhBr | OAc  | Br | Et <sub>3</sub> N  | DMF/H <sub>2</sub> O | Et <sub>3</sub> N·HBr  | 0.78 | 0.72 | 0.56 | 0.47 | 0.72 | 0.72 | 0.52 | 0.47 | 0.89 | 0.55 | 0.49 | 0.45 |
| B-A-B-A-E | PhBr | OAc  | Br | Et <sub>3</sub> N  | NMP/H <sub>2</sub> O | Et <sub>3</sub> N·HBr  | 0.63 | 0.42 | 0.27 | 0.17 | 0.53 | 0.42 | 0.22 | 0.17 | 0.76 | 0.25 | 0.19 | 0.15 |
| B-A-B-B-A | PhBr | OAc  | Br | Et <sub>2</sub> NH | DMF                  | Et <sub>2</sub> NH·HBr | 0.52 | 1.78 | 0.92 | 0.82 | 0.6  | 1.49 | 0.89 | 0.84 | 0.49 | 1.78 | 0.87 | 0.83 |
| B-A-B-B-B | PhBr | OAc  | Br | Et <sub>2</sub> NH | NMP                  | Et <sub>2</sub> NH·HBr | 0.27 | 1.18 | 0.32 | 0.23 | 0.33 | 0.9  | 0.29 | 0.24 | 0.23 | 1.18 | 0.27 | 0.23 |
| B-A-B-B-C | PhBr | OAc  | Br | Et <sub>2</sub> NH | H <sub>2</sub> O     | Et <sub>2</sub> NH·HBr | 0.18 | 1.05 | 0.19 | 0.1  | 0.21 | 0.76 | 0.16 | 0.11 | 0.13 | 1.05 | 0.14 | 0.1  |
| B-A-B-B-D | PhBr | OAc  | Br | Et <sub>2</sub> NH | DMF/H <sub>2</sub> O | Et <sub>2</sub> NH·HBr | 0.39 | 1.41 | 0.55 | 0.46 | 0.46 | 1.13 | 0.52 | 0.47 | 0.36 | 1.41 | 0.5  | 0.46 |
| B-A-B-B-E | PhBr | OAc  | Br | Et <sub>2</sub> NH | NMP/H <sub>2</sub> O | Et <sub>2</sub> NH·HBr | 0.23 | 1.12 | 0.25 | 0.16 | 0.27 | 0.83 | 0.23 | 0.18 | 0.19 | 1.12 | 0.21 | 0.17 |
| B-B-A-A-A | PhBr | Cl   | I  | Et <sub>3</sub> N  | DMF                  | Et <sub>3</sub> N·HBr  | 0.85 | 1.06 | 0.9  | 0.81 | 0.81 | 1.06 | 0.87 | 0.82 | 0.93 | 0.89 | 0.82 | 0.78 |
| B-B-A-A-B | PhBr | Cl   | I  | Et <sub>3</sub> N  | NMP                  | Et <sub>3</sub> N·HBr  | 0.66 | 0.47 | 0.31 | 0.22 | 0.58 | 0.47 | 0.27 | 0.22 | 0.79 | 0.29 | 0.23 | 0.19 |
| B-B-A-A-C | PhBr | Cl   | I  | Et <sub>3</sub> N  | H <sub>2</sub> O     | Et <sub>3</sub> N·HBr  | 0.52 | 0.33 | 0.17 | 0.08 | 0.41 | 0.34 | 0.14 | 0.09 | 0.61 | 0.16 | 0.1  | 0.05 |
| B-B-A-A-D | PhBr | Cl   | I  | Et <sub>3</sub> N  | DMF/H <sub>2</sub> O | Et <sub>3</sub> N·HBr  | 0.77 | 0.7  | 0.54 | 0.45 | 0.72 | 0.7  | 0.5  | 0.45 | 0.88 | 0.52 | 0.46 | 0.42 |
| B-B-A-A-E | PhBr | Cl   | I  | Et <sub>3</sub> N  | NMP/H <sub>2</sub> O | Et <sub>3</sub> N·HBr  | 0.6  | 0.4  | 0.24 | 0.15 | 0.51 | 0.4  | 0.2  | 0.15 | 0.72 | 0.22 | 0.16 | 0.12 |
| B-B-A-B-A | PhBr | Cl   | I  | Et <sub>2</sub> NH | DMF                  | Et <sub>2</sub> NH·HBr | 0.51 | 1.75 | 0.89 | 0.8  | 0.59 | 1.47 | 0.87 | 0.82 | 0.48 | 1.75 | 0.84 | 0.8  |

|           |      |      |    |                    |                      |                        |      |      |      |      |      |      |      |      |      |      |      |      |
|-----------|------|------|----|--------------------|----------------------|------------------------|------|------|------|------|------|------|------|------|------|------|------|------|
| B-B-A-B-B | PhBr | Cl   | I  | Et <sub>2</sub> NH | NMP                  | Et <sub>2</sub> NH·HBr | 0.26 | 1.16 | 0.3  | 0.2  | 0.31 | 0.88 | 0.28 | 0.23 | 0.21 | 1.15 | 0.24 | 0.2  |
| B-B-A-B-C | PhBr | Cl   | I  | Et <sub>2</sub> NH | H <sub>2</sub> O     | Et <sub>2</sub> NH·HBr | 0.16 | 1.02 | 0.16 | 0.07 | 0.19 | 0.75 | 0.14 | 0.09 | 0.11 | 1.02 | 0.11 | 0.07 |
| B-B-A-B-D | PhBr | Cl   | I  | Et <sub>2</sub> NH | DMF/H <sub>2</sub> O | Et <sub>2</sub> NH·HBr | 0.38 | 1.39 | 0.53 | 0.44 | 0.46 | 1.11 | 0.51 | 0.46 | 0.34 | 1.38 | 0.47 | 0.43 |
| B-B-A-B-E | PhBr | Cl   | I  | Et <sub>2</sub> NH | NMP/H <sub>2</sub> O | Et <sub>2</sub> NH·HBr | 0.21 | 1.09 | 0.23 | 0.14 | 0.26 | 0.81 | 0.21 | 0.16 | 0.16 | 1.09 | 0.18 | 0.13 |
| B-B-B-A-A | PhBr | Cl   | Br | Et <sub>3</sub> N  | DMF                  | Et <sub>3</sub> N·HBr  | 0.85 | 1.09 | 0.93 | 0.84 | 0.82 | 1.09 | 0.89 | 0.84 | 0.93 | 0.92 | 0.86 | 0.82 |
| B-B-B-A-B | PhBr | Cl   | Br | Et <sub>3</sub> N  | NMP                  | Et <sub>3</sub> N·HBr  | 0.68 | 0.5  | 0.34 | 0.25 | 0.6  | 0.5  | 0.3  | 0.25 | 0.81 | 0.33 | 0.26 | 0.22 |
| B-B-B-A-C | PhBr | Cl   | Br | Et <sub>3</sub> N  | H <sub>2</sub> O     | Et <sub>3</sub> N·HBr  | 0.56 | 0.36 | 0.2  | 0.11 | 0.46 | 0.36 | 0.17 | 0.12 | 0.68 | 0.19 | 0.13 | 0.09 |
| B-B-B-A-D | PhBr | Cl   | Br | Et <sub>3</sub> N  | DMF/H <sub>2</sub> O | Et <sub>3</sub> N·HBr  | 0.78 | 0.73 | 0.57 | 0.48 | 0.73 | 0.73 | 0.53 | 0.48 | 0.89 | 0.56 | 0.49 | 0.45 |
| B-B-B-A-E | PhBr | Cl   | Br | Et <sub>3</sub> N  | NMP/H <sub>2</sub> O | Et <sub>3</sub> N·HBr  | 0.63 | 0.43 | 0.27 | 0.18 | 0.54 | 0.43 | 0.23 | 0.18 | 0.76 | 0.26 | 0.2  | 0.16 |
| B-B-B-B-A | PhBr | Cl   | Br | Et <sub>2</sub> NH | DMF                  | Et <sub>2</sub> NH·HBr | 0.52 | 1.78 | 0.92 | 0.83 | 0.6  | 1.5  | 0.9  | 0.85 | 0.49 | 1.78 | 0.87 | 0.83 |
| B-B-B-B-B | PhBr | Cl   | Br | Et <sub>2</sub> NH | NMP                  | Et <sub>2</sub> NH·HBr | 0.27 | 1.19 | 0.33 | 0.23 | 0.34 | 0.91 | 0.31 | 0.25 | 0.23 | 1.19 | 0.28 | 0.24 |
| B-B-B-B-C | PhBr | Cl   | Br | Et <sub>2</sub> NH | H <sub>2</sub> O     | Et <sub>2</sub> NH·HBr | 0.18 | 1.05 | 0.19 | 0.1  | 0.22 | 0.77 | 0.17 | 0.12 | 0.14 | 1.06 | 0.14 | 0.1  |
| B-B-B-B-D | PhBr | Cl   | Br | Et <sub>2</sub> NH | DMF/H <sub>2</sub> O | Et <sub>2</sub> NH·HBr | 0.39 | 1.42 | 0.56 | 0.46 | 0.47 | 1.14 | 0.54 | 0.48 | 0.36 | 1.42 | 0.51 | 0.47 |
| B-B-B-B-E | PhBr | Cl   | Br | Et <sub>2</sub> NH | NMP/H <sub>2</sub> O | Et <sub>2</sub> NH·HBr | 0.23 | 1.12 | 0.26 | 0.17 | 0.28 | 0.84 | 0.24 | 0.19 | 0.19 | 1.12 | 0.21 | 0.17 |
| B-C-A-A-A | PhBr | acac | I  | Et <sub>3</sub> N  | DMF                  | Et <sub>3</sub> N·HBr  | 0.88 | 1.32 | 1.16 | 1.07 | 0.92 | 2.47 | 2.27 | 2.22 | 0.96 | 1.59 | 1.52 | 1.48 |
| B-C-A-A-B | PhBr | acac | I  | Et <sub>3</sub> N  | NMP                  | Et <sub>3</sub> N·HBr  | 0.78 | 0.72 | 0.56 | 0.47 | 0.89 | 1.87 | 1.67 | 1.62 | 0.94 | 0.99 | 0.93 | 0.89 |
| B-C-A-A-C | PhBr | acac | I  | Et <sub>3</sub> N  | H <sub>2</sub> O     | Et <sub>3</sub> N·HBr  | 0.73 | 0.59 | 0.43 | 0.34 | 0.89 | 1.74 | 1.54 | 1.49 | 0.93 | 0.86 | 0.8  | 0.75 |
| B-C-A-A-D | PhBr | acac | I  | Et <sub>3</sub> N  | DMF/H <sub>2</sub> O | Et <sub>3</sub> N·HBr  | 0.83 | 0.95 | 0.79 | 0.7  | 0.91 | 2.1  | 1.9  | 1.85 | 0.95 | 1.22 | 1.16 | 1.12 |
| B-C-A-A-E | PhBr | acac | I  | Et <sub>3</sub> N  | NMP/H <sub>2</sub> O | Et <sub>3</sub> N·HBr  | 0.76 | 0.65 | 0.5  | 0.4  | 0.89 | 1.81 | 1.61 | 1.56 | 0.93 | 0.92 | 0.86 | 0.82 |
| B-C-A-B-A | PhBr | acac | I  | Et <sub>2</sub> NH | DMF                  | Et <sub>2</sub> NH·HBr | 0.57 | 2.01 | 1.15 | 1.05 | 0.79 | 2.88 | 2.27 | 2.22 | 0.63 | 2.45 | 1.54 | 1.5  |
| B-C-A-B-B | PhBr | acac | I  | Et <sub>2</sub> NH | NMP                  | Et <sub>2</sub> NH·HBr | 0.39 | 1.41 | 0.55 | 0.46 | 0.74 | 2.28 | 1.68 | 1.63 | 0.51 | 1.85 | 0.94 | 0.9  |
| B-C-A-B-C | PhBr | acac | I  | Et <sub>2</sub> NH | H <sub>2</sub> O     | Et <sub>2</sub> NH·HBr | 0.33 | 1.28 | 0.42 | 0.33 | 0.72 | 2.15 | 1.55 | 1.5  | 0.47 | 1.72 | 0.81 | 0.77 |
| B-C-A-B-D | PhBr | acac | I  | Et <sub>2</sub> NH | DMF/H <sub>2</sub> O | Et <sub>2</sub> NH·HBr | 0.48 | 1.64 | 0.78 | 0.69 | 0.76 | 2.51 | 1.91 | 1.86 | 0.56 | 2.08 | 1.17 | 1.13 |
| B-C-A-B-E | PhBr | acac | I  | Et <sub>2</sub> NH | NMP/H <sub>2</sub> O | Et <sub>2</sub> NH·HBr | 0.36 | 1.35 | 0.48 | 0.39 | 0.73 | 2.22 | 1.61 | 1.56 | 0.49 | 1.79 | 0.88 | 0.84 |
| B-C-B-A-A | PhBr | acac | Br | Et <sub>3</sub> N  | DMF                  | Et <sub>3</sub> N·HBr  | 0.88 | 1.35 | 1.19 | 1.1  | 0.92 | 2.5  | 2.3  | 2.25 | 0.96 | 1.62 | 1.56 | 1.52 |
| B-C-B-A-B | PhBr | acac | Br | Et <sub>3</sub> N  | NMP                  | Et <sub>3</sub> N·HBr  | 0.79 | 0.75 | 0.59 | 0.5  | 0.9  | 1.9  | 1.7  | 1.65 | 0.94 | 1.03 | 0.97 | 0.92 |
| B-C-B-A-C | PhBr | acac | Br | Et <sub>3</sub> N  | H <sub>2</sub> O     | Et <sub>3</sub> N·HBr  | 0.74 | 0.62 | 0.46 | 0.37 | 0.89 | 1.77 | 1.57 | 1.52 | 0.93 | 0.89 | 0.83 | 0.79 |
| B-C-B-A-D | PhBr | acac | Br | Et <sub>3</sub> N  | DMF/H <sub>2</sub> O | Et <sub>3</sub> N·HBr  | 0.84 | 0.98 | 0.82 | 0.73 | 0.91 | 2.13 | 1.93 | 1.88 | 0.95 | 1.26 | 1.2  | 1.15 |
| B-C-B-A-E | PhBr | acac | Br | Et <sub>3</sub> N  | NMP/H <sub>2</sub> O | Et <sub>3</sub> N·HBr  | 0.77 | 0.68 | 0.53 | 0.43 | 0.89 | 1.83 | 1.64 | 1.59 | 0.94 | 0.96 | 0.9  | 0.86 |
| B-C-B-B-A | PhBr | acac | Br | Et <sub>2</sub> NH | DMF                  | Et <sub>2</sub> NH·HBr | 0.58 | 2.04 | 1.18 | 1.08 | 0.79 | 2.9  | 2.3  | 2.25 | 0.63 | 2.48 | 1.57 | 1.53 |
| B-C-B-B-B | PhBr | acac | Br | Et <sub>2</sub> NH | NMP                  | Et <sub>2</sub> NH·HBr | 0.4  | 1.44 | 0.58 | 0.49 | 0.74 | 2.31 | 1.71 | 1.66 | 0.52 | 1.89 | 0.98 | 0.94 |
| B-C-B-B-C | PhBr | acac | Br | Et <sub>2</sub> NH | H <sub>2</sub> O     | Et <sub>2</sub> NH·HBr | 0.34 | 1.31 | 0.45 | 0.36 | 0.72 | 2.18 | 1.57 | 1.52 | 0.48 | 1.76 | 0.85 | 0.8  |
| B-C-B-B-D | PhBr | acac | Br | Et <sub>2</sub> NH | DMF/H <sub>2</sub> O | Et <sub>2</sub> NH·HBr | 0.49 | 1.67 | 0.81 | 0.72 | 0.76 | 2.54 | 1.94 | 1.89 | 0.57 | 2.12 | 1.21 | 1.17 |
| B-C-B-B-E | PhBr | acac | Br | Et <sub>2</sub> NH | NMP/H <sub>2</sub> O | Et <sub>2</sub> NH·HBr | 0.37 | 1.38 | 0.51 | 0.42 | 0.73 | 2.24 | 1.64 | 1.59 | 0.5  | 1.82 | 0.91 | 0.87 |
| C-A-A-A-A | PhCl | OAc  | I  | Et <sub>3</sub> N  | DMF                  | Et <sub>3</sub> N·HCl  | 0.92 | 1    | 0.91 | 0.82 | 0.84 | 1    | 0.85 | 0.8  | 0.98 | 0.85 | 0.83 | 0.79 |
| C-A-A-A-B | PhCl | OAc  | I  | Et <sub>3</sub> N  | NMP                  | Et <sub>3</sub> N·HCl  | 0.79 | 0.4  | 0.32 | 0.23 | 0.62 | 0.41 | 0.25 | 0.2  | 0.92 | 0.26 | 0.24 | 0.19 |
| C-A-A-A-C | PhCl | OAc  | I  | Et <sub>3</sub> N  | H <sub>2</sub> O     | Et <sub>3</sub> N·HCl  | 0.69 | 0.27 | 0.18 | 0.09 | 0.43 | 0.28 | 0.12 | 0.07 | 0.83 | 0.12 | 0.1  | 0.06 |
| C-A-A-A-D | PhCl | OAc  | I  | Et <sub>3</sub> N  | DMF/H <sub>2</sub> O | Et <sub>3</sub> N·HCl  | 0.87 | 0.63 | 0.55 | 0.46 | 0.76 | 0.64 | 0.48 | 0.43 | 0.96 | 0.49 | 0.47 | 0.42 |
| C-A-A-A-E | PhCl | OAc  | I  | Et <sub>3</sub> N  | NMP/H <sub>2</sub> O | Et <sub>3</sub> N·HCl  | 0.75 | 0.33 | 0.25 | 0.16 | 0.54 | 0.34 | 0.19 | 0.14 | 0.89 | 0.19 | 0.17 | 0.13 |
| C-A-A-B-A | PhCl | OAc  | I  | Et <sub>2</sub> NH | DMF                  | Et <sub>2</sub> NH·HCl | 0.56 | 1.69 | 0.94 | 0.85 | 0.6  | 1.41 | 0.85 | 0.8  | 0.48 | 1.71 | 0.82 | 0.78 |
| C-A-A-B-B | PhCl | OAc  | I  | Et <sub>2</sub> NH | NMP                  | Et <sub>2</sub> NH·HCl | 0.31 | 1.09 | 0.34 | 0.25 | 0.31 | 0.82 | 0.25 | 0.2  | 0.2  | 1.12 | 0.22 | 0.18 |
| C-A-A-B-C | PhCl | OAc  | I  | Et <sub>2</sub> NH | H <sub>2</sub> O     | Et <sub>2</sub> NH·HCl | 0.22 | 0.96 | 0.21 | 0.12 | 0.17 | 0.68 | 0.12 | 0.07 | 0.09 | 0.99 | 0.09 | 0.05 |
| C-A-A-B-D | PhCl | OAc  | I  | Et <sub>2</sub> NH | DMF/H <sub>2</sub> O | Et <sub>2</sub> NH·HCl | 0.43 | 1.32 | 0.57 | 0.48 | 0.46 | 1.05 | 0.48 | 0.43 | 0.34 | 1.35 | 0.45 | 0.41 |
| C-A-A-B-E | PhCl | OAc  | I  | Et <sub>2</sub> NH | NMP/H <sub>2</sub> O | Et <sub>2</sub> NH·HCl | 0.27 | 1.03 | 0.28 | 0.18 | 0.25 | 0.75 | 0.18 | 0.13 | 0.15 | 1.05 | 0.16 | 0.11 |
| C-A-B-A-A | PhCl | OAc  | Br | Et <sub>3</sub> N  | DMF                  | Et <sub>3</sub> N·HCl  | 0.92 | 1.03 | 0.94 | 0.85 | 0.85 | 1.03 | 0.88 | 0.82 | 0.98 | 0.89 | 0.87 | 0.82 |

|           |      |      |    |                    |                      |                        |      |      |      |      |      |      |      |      |      |      |      |      |
|-----------|------|------|----|--------------------|----------------------|------------------------|------|------|------|------|------|------|------|------|------|------|------|------|
| C-A-B-A-B | PhCl | OAc  | Br | Et <sub>3</sub> N  | NMP                  | Et <sub>3</sub> N·HCl  | 0.81 | 0.43 | 0.35 | 0.26 | 0.64 | 0.44 | 0.28 | 0.23 | 0.93 | 0.29 | 0.27 | 0.23 |
| C-A-B-A-C | PhCl | OAc  | Br | Et <sub>3</sub> N  | H <sub>2</sub> O     | Et <sub>3</sub> N·HCl  | 0.72 | 0.3  | 0.21 | 0.12 | 0.49 | 0.3  | 0.15 | 0.1  | 0.87 | 0.16 | 0.14 | 0.1  |
| C-A-B-A-D | PhCl | OAc  | Br | Et <sub>3</sub> N  | DMF/H <sub>2</sub> O | Et <sub>3</sub> N·HCl  | 0.87 | 0.66 | 0.58 | 0.49 | 0.77 | 0.67 | 0.51 | 0.46 | 0.96 | 0.52 | 0.5  | 0.46 |
| C-A-B-A-E | PhCl | OAc  | Br | Et <sub>3</sub> N  | NMP/H <sub>2</sub> O | Et <sub>3</sub> N·HCl  | 0.77 | 0.36 | 0.28 | 0.19 | 0.58 | 0.37 | 0.21 | 0.16 | 0.91 | 0.23 | 0.2  | 0.16 |
| C-A-B-B-A | PhCl | OAc  | Br | Et <sub>2</sub> NH | DMF                  | Et <sub>2</sub> NH·HCl | 0.56 | 1.72 | 0.97 | 0.88 | 0.61 | 1.44 | 0.87 | 0.82 | 0.49 | 1.75 | 0.85 | 0.81 |
| C-A-B-B-B | PhCl | OAc  | Br | Et <sub>2</sub> NH | NMP                  | Et <sub>2</sub> NH·HCl | 0.33 | 1.12 | 0.37 | 0.28 | 0.33 | 0.85 | 0.28 | 0.23 | 0.22 | 1.16 | 0.26 | 0.22 |
| C-A-B-B-C | PhCl | OAc  | Br | Et <sub>2</sub> NH | H <sub>2</sub> O     | Et <sub>2</sub> NH·HCl | 0.24 | 0.99 | 0.24 | 0.15 | 0.21 | 0.71 | 0.15 | 0.1  | 0.12 | 1.02 | 0.12 | 0.08 |
| C-A-B-B-D | PhCl | OAc  | Br | Et <sub>2</sub> NH | DMF/H <sub>2</sub> O | Et <sub>2</sub> NH·HCl | 0.45 | 1.35 | 0.6  | 0.51 | 0.47 | 1.08 | 0.51 | 0.46 | 0.35 | 1.39 | 0.49 | 0.45 |
| C-A-B-B-E | PhCl | OAc  | Br | Et <sub>2</sub> NH | NMP/H <sub>2</sub> O | Et <sub>2</sub> NH·HCl | 0.29 | 1.06 | 0.31 | 0.21 | 0.27 | 0.78 | 0.21 | 0.16 | 0.18 | 1.09 | 0.19 | 0.15 |
| C-B-A-A-A | PhCl | Cl   | I  | Et <sub>3</sub> N  | DMF                  | Et <sub>3</sub> N·HCl  | 0.92 | 1    | 0.92 | 0.83 | 0.85 | 1.02 | 0.86 | 0.81 | 0.98 | 0.86 | 0.84 | 0.79 |
| C-B-A-A-B | PhCl | Cl   | I  | Et <sub>3</sub> N  | NMP                  | Et <sub>3</sub> N·HCl  | 0.79 | 0.41 | 0.32 | 0.23 | 0.63 | 0.42 | 0.26 | 0.21 | 0.92 | 0.26 | 0.24 | 0.2  |
| C-B-A-A-C | PhCl | Cl   | I  | Et <sub>3</sub> N  | H <sub>2</sub> O     | Et <sub>3</sub> N·HCl  | 0.69 | 0.27 | 0.19 | 0.1  | 0.46 | 0.29 | 0.13 | 0.08 | 0.84 | 0.13 | 0.11 | 0.07 |
| C-B-A-A-D | PhCl | Cl   | I  | Et <sub>3</sub> N  | DMF/H <sub>2</sub> O | Et <sub>3</sub> N·HCl  | 0.87 | 0.64 | 0.55 | 0.46 | 0.76 | 0.65 | 0.49 | 0.44 | 0.96 | 0.49 | 0.47 | 0.43 |
| C-B-A-A-E | PhCl | Cl   | I  | Et <sub>3</sub> N  | NMP/H <sub>2</sub> O | Et <sub>3</sub> N·HCl  | 0.75 | 0.34 | 0.26 | 0.16 | 0.56 | 0.35 | 0.2  | 0.15 | 0.89 | 0.19 | 0.17 | 0.13 |
| C-B-A-B-A | PhCl | Cl   | I  | Et <sub>2</sub> NH | DMF                  | Et <sub>2</sub> NH·HCl | 0.56 | 1.69 | 0.94 | 0.85 | 0.6  | 1.42 | 0.86 | 0.81 | 0.48 | 1.72 | 0.82 | 0.78 |
| C-B-A-B-B | PhCl | Cl   | I  | Et <sub>2</sub> NH | NMP                  | Et <sub>2</sub> NH·HCl | 0.32 | 1.1  | 0.35 | 0.26 | 0.32 | 0.83 | 0.26 | 0.21 | 0.2  | 1.12 | 0.23 | 0.19 |
| C-B-A-B-C | PhCl | Cl   | I  | Et <sub>2</sub> NH | H <sub>2</sub> O     | Et <sub>2</sub> NH·HCl | 0.22 | 0.96 | 0.21 | 0.12 | 0.19 | 0.7  | 0.13 | 0.08 | 0.09 | 0.99 | 0.09 | 0.05 |
| C-B-A-B-D | PhCl | Cl   | I  | Et <sub>2</sub> NH | DMF/H <sub>2</sub> O | Et <sub>2</sub> NH·HCl | 0.43 | 1.33 | 0.58 | 0.49 | 0.47 | 1.06 | 0.49 | 0.44 | 0.34 | 1.35 | 0.46 | 0.42 |
| C-B-A-B-E | PhCl | Cl   | I  | Et <sub>2</sub> NH | NMP/H <sub>2</sub> O | Et <sub>2</sub> NH·HCl | 0.27 | 1.03 | 0.28 | 0.19 | 0.26 | 0.76 | 0.2  | 0.15 | 0.15 | 1.06 | 0.16 | 0.12 |
| C-B-B-A-A | PhCl | Cl   | Br | Et <sub>3</sub> N  | DMF                  | Et <sub>3</sub> N·HCl  | 0.92 | 1.03 | 0.95 | 0.86 | 0.85 | 1.04 | 0.89 | 0.84 | 0.98 | 0.89 | 0.87 | 0.83 |
| C-B-B-A-B | PhCl | Cl   | Br | Et <sub>3</sub> N  | NMP                  | Et <sub>3</sub> N·HCl  | 0.81 | 0.44 | 0.35 | 0.26 | 0.65 | 0.45 | 0.29 | 0.24 | 0.93 | 0.3  | 0.28 | 0.23 |
| C-B-B-A-C | PhCl | Cl   | Br | Et <sub>3</sub> N  | H <sub>2</sub> O     | Et <sub>3</sub> N·HCl  | 0.72 | 0.3  | 0.22 | 0.13 | 0.5  | 0.32 | 0.16 | 0.11 | 0.87 | 0.16 | 0.14 | 0.1  |
| C-B-B-A-D | PhCl | Cl   | Br | Et <sub>3</sub> N  | DMF/H <sub>2</sub> O | Et <sub>3</sub> N·HCl  | 0.87 | 0.67 | 0.58 | 0.49 | 0.77 | 0.68 | 0.52 | 0.47 | 0.96 | 0.53 | 0.51 | 0.46 |
| C-B-B-A-E | PhCl | Cl   | Br | Et <sub>3</sub> N  | NMP/H <sub>2</sub> O | Et <sub>3</sub> N·HCl  | 0.77 | 0.37 | 0.29 | 0.19 | 0.59 | 0.38 | 0.23 | 0.18 | 0.91 | 0.23 | 0.21 | 0.17 |
| C-B-B-B-A | PhCl | Cl   | Br | Et <sub>2</sub> NH | DMF                  | Et <sub>2</sub> NH·HCl | 0.56 | 1.72 | 0.97 | 0.88 | 0.61 | 1.45 | 0.89 | 0.84 | 0.49 | 1.75 | 0.86 | 0.82 |
| C-B-B-B-B | PhCl | Cl   | Br | Et <sub>2</sub> NH | NMP                  | Et <sub>2</sub> NH·HCl | 0.33 | 1.13 | 0.38 | 0.29 | 0.34 | 0.86 | 0.29 | 0.24 | 0.23 | 1.16 | 0.26 | 0.22 |
| C-B-B-B-C | PhCl | Cl   | Br | Et <sub>2</sub> NH | H <sub>2</sub> O     | Et <sub>2</sub> NH·HCl | 0.24 | 0.99 | 0.24 | 0.15 | 0.22 | 0.72 | 0.16 | 0.11 | 0.13 | 1.03 | 0.13 | 0.09 |
| C-B-B-B-D | PhCl | Cl   | Br | Et <sub>2</sub> NH | DMF/H <sub>2</sub> O | Et <sub>2</sub> NH·HCl | 0.45 | 1.36 | 0.61 | 0.52 | 0.48 | 1.09 | 0.52 | 0.47 | 0.35 | 1.39 | 0.49 | 0.45 |
| C-B-B-B-E | PhCl | Cl   | Br | Et <sub>2</sub> NH | NMP/H <sub>2</sub> O | Et <sub>2</sub> NH·HCl | 0.29 | 1.06 | 0.31 | 0.22 | 0.28 | 0.79 | 0.23 | 0.17 | 0.18 | 1.09 | 0.2  | 0.15 |
| C-C-A-A-A | PhCl | acac | I  | Et <sub>3</sub> N  | DMF                  | Et <sub>3</sub> N·HCl  | 0.93 | 1.26 | 1.17 | 1.08 | 0.94 | 2.42 | 2.26 | 2.21 | 0.99 | 1.56 | 1.54 | 1.49 |
| C-C-A-A-B | PhCl | acac | I  | Et <sub>3</sub> N  | NMP                  | Et <sub>3</sub> N·HCl  | 0.87 | 0.66 | 0.58 | 0.49 | 0.91 | 1.82 | 1.67 | 1.62 | 0.98 | 0.96 | 0.94 | 0.9  |
| C-C-A-A-C | PhCl | acac | I  | Et <sub>3</sub> N  | H <sub>2</sub> O     | Et <sub>3</sub> N·HCl  | 0.84 | 0.53 | 0.44 | 0.35 | 0.91 | 1.69 | 1.53 | 1.48 | 0.98 | 0.83 | 0.81 | 0.77 |
| C-C-A-A-D | PhCl | acac | I  | Et <sub>3</sub> N  | DMF/H <sub>2</sub> O | Et <sub>3</sub> N·HCl  | 0.91 | 0.89 | 0.81 | 0.72 | 0.92 | 2.05 | 1.9  | 1.85 | 0.98 | 1.19 | 1.17 | 1.13 |
| C-C-A-A-E | PhCl | acac | I  | Et <sub>3</sub> N  | NMP/H <sub>2</sub> O | Et <sub>3</sub> N·HCl  | 0.86 | 0.6  | 0.51 | 0.42 | 0.91 | 1.76 | 1.6  | 1.55 | 0.98 | 0.9  | 0.87 | 0.83 |
| C-C-A-B-A | PhCl | acac | I  | Et <sub>2</sub> NH | DMF                  | Et <sub>2</sub> NH·HCl | 0.61 | 1.95 | 1.2  | 1.11 | 0.8  | 2.83 | 2.26 | 2.21 | 0.63 | 2.42 | 1.52 | 1.48 |
| C-C-A-B-B | PhCl | acac | I  | Et <sub>2</sub> NH | NMP                  | Et <sub>2</sub> NH·HCl | 0.45 | 1.35 | 0.6  | 0.51 | 0.75 | 2.23 | 1.67 | 1.62 | 0.51 | 1.83 | 0.93 | 0.89 |
| C-C-A-B-C | PhCl | acac | I  | Et <sub>2</sub> NH | H <sub>2</sub> O     | Et <sub>2</sub> NH·HCl | 0.38 | 1.22 | 0.47 | 0.38 | 0.73 | 2.1  | 1.53 | 1.48 | 0.47 | 1.69 | 0.79 | 0.75 |
| C-C-A-B-D | PhCl | acac | I  | Et <sub>2</sub> NH | DMF/H <sub>2</sub> O | Et <sub>2</sub> NH·HCl | 0.53 | 1.58 | 0.83 | 0.74 | 0.77 | 2.46 | 1.9  | 1.85 | 0.56 | 2.06 | 1.16 | 1.12 |
| C-C-A-B-E | PhCl | acac | I  | Et <sub>2</sub> NH | NMP/H <sub>2</sub> O | Et <sub>2</sub> NH·HCl | 0.42 | 1.29 | 0.54 | 0.45 | 0.74 | 2.17 | 1.6  | 1.55 | 0.49 | 1.76 | 0.86 | 0.82 |
| C-C-B-A-A | PhCl | acac | Br | Et <sub>3</sub> N  | DMF                  | Et <sub>3</sub> N·HCl  | 0.94 | 1.29 | 1.2  | 1.11 | 0.94 | 2.45 | 2.29 | 2.24 | 0.99 | 1.59 | 1.57 | 1.53 |
| C-C-B-A-B | PhCl | acac | Br | Et <sub>3</sub> N  | NMP                  | Et <sub>3</sub> N·HCl  | 0.88 | 0.69 | 0.61 | 0.52 | 0.92 | 1.85 | 1.7  | 1.65 | 0.98 | 1    | 0.98 | 0.94 |
| C-C-B-A-C | PhCl | acac | Br | Et <sub>3</sub> N  | H <sub>2</sub> O     | Et <sub>3</sub> N·HCl  | 0.85 | 0.56 | 0.47 | 0.38 | 0.91 | 1.72 | 1.56 | 1.51 | 0.98 | 0.86 | 0.84 | 0.8  |
| C-C-B-A-D | PhCl | acac | Br | Et <sub>3</sub> N  | DMF/H <sub>2</sub> O | Et <sub>3</sub> N·HCl  | 0.91 | 0.92 | 0.84 | 0.75 | 0.92 | 2.08 | 1.93 | 1.88 | 0.98 | 1.23 | 1.21 | 1.17 |
| C-C-B-A-E | PhCl | acac | Br | Et <sub>3</sub> N  | NMP/H <sub>2</sub> O | Et <sub>3</sub> N·HCl  | 0.87 | 0.63 | 0.54 | 0.45 | 0.91 | 1.78 | 1.63 | 1.58 | 0.98 | 0.93 | 0.91 | 0.87 |
| C-C-B-B-A | PhCl | acac | Br | Et <sub>2</sub> NH | DMF                  | Et <sub>2</sub> NH·HCl | 0.62 | 1.98 | 1.23 | 1.14 | 0.8  | 2.85 | 2.29 | 2.24 | 0.63 | 2.45 | 1.56 | 1.52 |

|           |      |      |    |                    |                      |                        |      |      |      |      |      |      |      |      |      |      |      |      |
|-----------|------|------|----|--------------------|----------------------|------------------------|------|------|------|------|------|------|------|------|------|------|------|------|
| C-C-B-B-B | PhCl | acac | Br | Et <sub>2</sub> NH | NMP                  | Et <sub>2</sub> NH·HCl | 0.46 | 1.38 | 0.63 | 0.54 | 0.75 | 2.26 | 1.69 | 1.64 | 0.52 | 1.86 | 0.96 | 0.92 |
| C-C-B-B-C | PhCl | acac | Br | Et <sub>2</sub> NH | H <sub>2</sub> O     | Et <sub>2</sub> NH·HCl | 0.4  | 1.25 | 0.5  | 0.41 | 0.73 | 2.13 | 1.56 | 1.51 | 0.48 | 1.73 | 0.83 | 0.79 |
| C-C-B-B-D | PhCl | acac | Br | Et <sub>2</sub> NH | DMF/H <sub>2</sub> O | Et <sub>2</sub> NH·HCl | 0.53 | 1.61 | 0.86 | 0.77 | 0.77 | 2.49 | 1.92 | 1.87 | 0.57 | 2.09 | 1.19 | 1.15 |
| C-C-B-B-E | PhCl | acac | Br | Et <sub>2</sub> NH | NMP/H <sub>2</sub> O | Et <sub>2</sub> NH·HCl | 0.43 | 1.32 | 0.57 | 0.47 | 0.74 | 2.19 | 1.63 | 1.58 | 0.5  | 1.79 | 0.9  | 0.86 |

Target product P (diphenylacetylene) and starting material SM1 (phenylacetylene) are not shown. PhI, iodobenzene; PhBr, bromobenzene; PhCl, chlorobenzene; DMF, dimethylformamide; NMP, *N*-methylpyrrolidone; BF, bio-Factor; CP<sub>i</sub>, initial cytotoxicity potential; CP<sub>f</sub>, final cytotoxicity potential; CP<sub>f,rel</sub>, relative final cytotoxicity potential. The reactions with the five lowest CPs are highlighted with green. Organic solvents mixed with water at a 1:1 mass ratio are indicated as solvent/H<sub>2</sub>O.

**Table S4.** bio-Factors and cytotoxicity potentials for synthesis of 1-nitro-4-(phenylethynyl)benzene.

| Reaction  | Starting materials (SM2) | Catalyst (CT1) PdA <sub>2</sub> | Catalyst (CT2) CuX | Reagent (R)        | Solvent (S)          | Byproduct (BP)        | CaCo-2 |                 |                 |                     | FRSN |                 |                 |                     | HEK293T |                 |                 |                     |
|-----------|--------------------------|---------------------------------|--------------------|--------------------|----------------------|-----------------------|--------|-----------------|-----------------|---------------------|------|-----------------|-----------------|---------------------|---------|-----------------|-----------------|---------------------|
|           |                          |                                 |                    |                    |                      |                       | BF     | CP <sub>i</sub> | CP <sub>f</sub> | CP <sub>f,rel</sub> | BF   | CP <sub>i</sub> | CP <sub>f</sub> | CP <sub>f,rel</sub> | BF      | CP <sub>i</sub> | CP <sub>f</sub> | CP <sub>f,rel</sub> |
| A-A-A-A-A | R-I                      | OAc                             | I                  | Et <sub>3</sub> N  | DMF                  | Et <sub>3</sub> N·HI  | 1      | 0.92            | 0.92            | 0.82                | 1    | 0.89            | 0.89            | 0.8                 | 1.03    | 0.85            | 0.88            | 0.78                |
| A-A-A-A-B | R-I                      | OAc                             | I                  | Et <sub>3</sub> N  | NMP                  | Et <sub>3</sub> N·HI  | 1      | 0.33            | 0.33            | 0.23                | 1    | 0.3             | 0.3             | 0.21                | 1.11    | 0.26            | 0.29            | 0.19                |
| A-A-A-A-C | R-I                      | OAc                             | I                  | Et <sub>3</sub> N  | H <sub>2</sub> O     | Et <sub>3</sub> N·HI  | 1      | 0.2             | 0.2             | 0.1                 | 1    | 0.17            | 0.17            | 0.07                | 1.23    | 0.12            | 0.15            | 0.05                |
| A-A-A-A-D | R-I                      | OAc                             | I                  | Et <sub>3</sub> N  | DMF/H <sub>2</sub> O | Et <sub>3</sub> N·HI  | 1      | 0.56            | 0.56            | 0.46                | 1    | 0.53            | 0.53            | 0.44                | 1.06    | 0.49            | 0.52            | 0.42                |
| A-A-A-A-E | R-I                      | OAc                             | I                  | Et <sub>3</sub> N  | NMP/H <sub>2</sub> O | Et <sub>3</sub> N·HI  | 1      | 0.26            | 0.26            | 0.16                | 1    | 0.23            | 0.23            | 0.14                | 1.15    | 0.19            | 0.22            | 0.12                |
| A-A-A-B-A | R-I                      | OAc                             | I                  | Et <sub>2</sub> NH | DMF                  | Et <sub>2</sub> NH·HI | 0.6    | 1.62            | 0.97            | 0.87                | 0.68 | 1.3             | 0.89            | 0.8                 | 0.51    | 1.71            | 0.87            | 0.77                |
| A-A-A-B-B | R-I                      | OAc                             | I                  | Et <sub>2</sub> NH | NMP                  | Et <sub>2</sub> NH·HI | 0.37   | 1.02            | 0.38            | 0.28                | 0.42 | 0.71            | 0.3             | 0.21                | 0.25    | 1.12            | 0.28            | 0.18                |
| A-A-A-B-C | R-I                      | OAc                             | I                  | Et <sub>2</sub> NH | H <sub>2</sub> O     | Et <sub>2</sub> NH·HI | 0.27   | 0.89            | 0.24            | 0.14                | 0.28 | 0.58            | 0.16            | 0.07                | 0.15    | 0.99            | 0.15            | 0.05                |
| A-A-A-B-D | R-I                      | OAc                             | I                  | Et <sub>2</sub> NH | DMF/H <sub>2</sub> O | Et <sub>2</sub> NH·HI | 0.48   | 1.25            | 0.61            | 0.51                | 0.56 | 0.94            | 0.53            | 0.44                | 0.38    | 1.35            | 0.51            | 0.41                |
| A-A-A-B-E | R-I                      | OAc                             | I                  | Et <sub>2</sub> NH | NMP/H <sub>2</sub> O | Et <sub>2</sub> NH·HI | 0.32   | 0.95            | 0.31            | 0.21                | 0.36 | 0.64            | 0.23            | 0.14                | 0.2     | 1.05            | 0.21            | 0.11                |
| A-A-B-A-A | R-I                      | OAc                             | Br                 | Et <sub>3</sub> N  | DMF                  | Et <sub>3</sub> N·HI  | 1      | 0.95            | 0.95            | 0.85                | 1    | 0.92            | 0.92            | 0.83                | 1.03    | 0.89            | 0.92            | 0.82                |
| A-A-B-A-B | R-I                      | OAc                             | Br                 | Et <sub>3</sub> N  | NMP                  | Et <sub>3</sub> N·HI  | 1      | 0.36            | 0.36            | 0.26                | 1    | 0.33            | 0.33            | 0.24                | 1.1     | 0.29            | 0.32            | 0.22                |
| A-A-B-A-C | R-I                      | OAc                             | Br                 | Et <sub>3</sub> N  | H <sub>2</sub> O     | Et <sub>3</sub> N·HI  | 1      | 0.23            | 0.23            | 0.13                | 1    | 0.19            | 0.19            | 0.1                 | 1.18    | 0.16            | 0.19            | 0.09                |
| A-A-B-A-D | R-I                      | OAc                             | Br                 | Et <sub>3</sub> N  | DMF/H <sub>2</sub> O | Et <sub>3</sub> N·HI  | 1      | 0.59            | 0.59            | 0.49                | 1    | 0.56            | 0.56            | 0.47                | 1.06    | 0.52            | 0.55            | 0.45                |
| A-A-B-A-E | R-I                      | OAc                             | Br                 | Et <sub>3</sub> N  | NMP/H <sub>2</sub> O | Et <sub>3</sub> N·HI  | 1      | 0.29            | 0.29            | 0.19                | 1    | 0.26            | 0.26            | 0.17                | 1.13    | 0.23            | 0.26            | 0.16                |
| A-A-B-B-A | R-I                      | OAc                             | Br                 | Et <sub>2</sub> NH | DMF                  | Et <sub>2</sub> NH·HI | 0.61   | 1.65            | 1               | 0.9                 | 0.69 | 1.33            | 0.92            | 0.83                | 0.52    | 1.75            | 0.91            | 0.81                |
| A-A-B-B-B | R-I                      | OAc                             | Br                 | Et <sub>2</sub> NH | NMP                  | Et <sub>2</sub> NH·HI | 0.39   | 1.05            | 0.41            | 0.31                | 0.44 | 0.74            | 0.32            | 0.23                | 0.27    | 1.16            | 0.32            | 0.22                |
| A-A-B-B-C | R-I                      | OAc                             | Br                 | Et <sub>2</sub> NH | H <sub>2</sub> O     | Et <sub>2</sub> NH·HI | 0.3    | 0.92            | 0.27            | 0.17                | 0.32 | 0.6             | 0.19            | 0.1                 | 0.18    | 1.02            | 0.18            | 0.08                |
| A-A-B-B-D | R-I                      | OAc                             | Br                 | Et <sub>2</sub> NH | DMF/H <sub>2</sub> O | Et <sub>2</sub> NH·HI | 0.5    | 1.28            | 0.64            | 0.54                | 0.57 | 0.97            | 0.56            | 0.46                | 0.39    | 1.39            | 0.55            | 0.45                |
| A-A-B-B-E | R-I                      | OAc                             | Br                 | Et <sub>2</sub> NH | NMP/H <sub>2</sub> O | Et <sub>2</sub> NH·HI | 0.34   | 0.98            | 0.34            | 0.24                | 0.38 | 0.67            | 0.26            | 0.17                | 0.23    | 1.09            | 0.25            | 0.15                |
| A-B-A-A-A | R-I                      | Cl                              | I                  | Et <sub>3</sub> N  | DMF                  | Et <sub>3</sub> N·HI  | 1      | 0.93            | 0.93            | 0.83                | 1    | 0.91            | 0.91            | 0.81                | 1.03    | 0.86            | 0.89            | 0.79                |
| A-B-A-A-B | R-I                      | Cl                              | I                  | Et <sub>3</sub> N  | NMP                  | Et <sub>3</sub> N·HI  | 1      | 0.34            | 0.34            | 0.24                | 1    | 0.31            | 0.31            | 0.22                | 1.11    | 0.26            | 0.29            | 0.19                |
| A-B-A-A-C | R-I                      | Cl                              | I                  | Et <sub>3</sub> N  | H <sub>2</sub> O     | Et <sub>3</sub> N·HI  | 1      | 0.2             | 0.2             | 0.1                 | 1    | 0.18            | 0.18            | 0.09                | 1.22    | 0.13            | 0.16            | 0.06                |
| A-B-A-A-D | R-I                      | Cl                              | I                  | Et <sub>3</sub> N  | DMF/H <sub>2</sub> O | Et <sub>3</sub> N·HI  | 1      | 0.57            | 0.57            | 0.47                | 1    | 0.54            | 0.54            | 0.45                | 1.06    | 0.49            | 0.52            | 0.42                |
| A-B-A-A-E | R-I                      | Cl                              | I                  | Et <sub>3</sub> N  | NMP/H <sub>2</sub> O | Et <sub>3</sub> N·HI  | 1      | 0.27            | 0.27            | 0.17                | 1    | 0.25            | 0.24            | 0.15                | 1.15    | 0.2             | 0.22            | 0.12                |
| A-B-A-B-A | R-I                      | Cl                              | I                  | Et <sub>2</sub> NH | DMF                  | Et <sub>2</sub> NH·HI | 0.6    | 1.62            | 0.97            | 0.87                | 0.69 | 1.32            | 0.9             | 0.81                | 0.51    | 1.72            | 0.88            | 0.78                |
| A-B-A-B-B | R-I                      | Cl                              | I                  | Et <sub>2</sub> NH | NMP                  | Et <sub>2</sub> NH·HI | 0.37   | 1.03            | 0.38            | 0.28                | 0.43 | 0.72            | 0.31            | 0.22                | 0.25    | 1.13            | 0.29            | 0.19                |
| A-B-A-B-C | R-I                      | Cl                              | I                  | Et <sub>2</sub> NH | H <sub>2</sub> O     | Et <sub>2</sub> NH·HI | 0.28   | 0.89            | 0.25            | 0.15                | 0.3  | 0.59            | 0.17            | 0.08                | 0.15    | 0.99            | 0.15            | 0.05                |
| A-B-A-B-D | R-I                      | Cl                              | I                  | Et <sub>2</sub> NH | DMF/H <sub>2</sub> O | Et <sub>2</sub> NH·HI | 0.49   | 1.26            | 0.61            | 0.51                | 0.57 | 0.95            | 0.54            | 0.45                | 0.38    | 1.36            | 0.52            | 0.42                |
| A-B-A-B-E | R-I                      | Cl                              | I                  | Et <sub>2</sub> NH | NMP/H <sub>2</sub> O | Et <sub>2</sub> NH·HI | 0.33   | 0.96            | 0.31            | 0.21                | 0.37 | 0.65            | 0.24            | 0.15                | 0.21    | 1.06            | 0.22            | 0.12                |
| A-B-B-A-A | R-I                      | Cl                              | Br                 | Et <sub>3</sub> N  | DMF                  | Et <sub>3</sub> N·HI  | 1      | 0.96            | 0.96            | 0.86                | 1    | 0.93            | 0.93            | 0.84                | 1.03    | 0.89            | 0.92            | 0.82                |
| A-B-B-A-B | R-I                      | Cl                              | Br                 | Et <sub>3</sub> N  | NMP                  | Et <sub>3</sub> N·HI  | 1      | 0.37            | 0.37            | 0.27                | 1    | 0.34            | 0.34            | 0.25                | 1.1     | 0.3             | 0.33            | 0.23                |
| A-B-B-A-C | R-I                      | Cl                              | Br                 | Et <sub>3</sub> N  | H <sub>2</sub> O     | Et <sub>3</sub> N·HI  | 1      | 0.23            | 0.23            | 0.13                | 1    | 0.21            | 0.21            | 0.11                | 1.18    | 0.16            | 0.19            | 0.09                |
| A-B-B-A-D | R-I                      | Cl                              | Br                 | Et <sub>3</sub> N  | DMF/H <sub>2</sub> O | Et <sub>3</sub> N·HI  | 1      | 0.6             | 0.6             | 0.5                 | 1    | 0.57            | 0.57            | 0.48                | 1.05    | 0.53            | 0.56            | 0.46                |
| A-B-B-A-E | R-I                      | Cl                              | Br                 | Et <sub>3</sub> N  | NMP/H <sub>2</sub> O | Et <sub>3</sub> N·HI  | 1      | 0.3             | 0.3             | 0.2                 | 1    | 0.27            | 0.27            | 0.18                | 1.13    | 0.23            | 0.26            | 0.16                |
| A-B-B-B-A | R-I                      | Cl                              | Br                 | Et <sub>2</sub> NH | DMF                  | Et <sub>2</sub> NH·HI | 0.61   | 1.65            | 1               | 0.9                 | 0.69 | 1.34            | 0.93            | 0.84                | 0.52    | 1.75            | 0.91            | 0.81                |
| A-B-B-B-B | R-I                      | Cl                              | Br                 | Et <sub>2</sub> NH | NMP                  | Et <sub>2</sub> NH·HI | 0.39   | 1.06            | 0.41            | 0.31                | 0.45 | 0.75            | 0.34            | 0.25                | 0.28    | 1.16            | 0.32            | 0.22                |
| A-B-B-B-C | R-I                      | Cl                              | Br                 | Et <sub>2</sub> NH | H <sub>2</sub> O     | Et <sub>2</sub> NH·HI | 0.3    | 0.92            | 0.28            | 0.18                | 0.33 | 0.62            | 0.2             | 0.11                | 0.18    | 1.03            | 0.19            | 0.09                |
| A-B-B-B-D | R-I                      | Cl                              | Br                 | Et <sub>2</sub> NH | DMF/H <sub>2</sub> O | Et <sub>2</sub> NH·HI | 0.5    | 1.29            | 0.64            | 0.54                | 0.58 | 0.98            | 0.57            | 0.48                | 0.4     | 1.39            | 0.55            | 0.45                |
| A-B-B-B-E | R-I                      | Cl                              | Br                 | Et <sub>2</sub> NH | NMP/H <sub>2</sub> O | Et <sub>2</sub> NH·HI | 0.35   | 0.99            | 0.34            | 0.24                | 0.4  | 0.68            | 0.27            | 0.18                | 0.23    | 1.09            | 0.25            | 0.15                |
| A-C-A-A-A | R-I                      | acac                            | I                  | Et <sub>3</sub> N  | DMF                  | Et <sub>3</sub> N·HI  | 1      | 1.19            | 1.19            | 1.09                | 1    | 2.31            | 2.31            | 2.22                | 1.02    | 1.56            | 1.59            | 1.49                |

|           |      |      |    |                    |                      |                        |      |      |      |      |      |      |      |      |      |      |      |      |
|-----------|------|------|----|--------------------|----------------------|------------------------|------|------|------|------|------|------|------|------|------|------|------|------|
| A-C-A-A-B | R-I  | acac | I  | Et <sub>3</sub> N  | NMP                  | Et <sub>3</sub> N·HI   | 1    | 0.59 | 0.59 | 0.49 | 1    | 1.71 | 1.71 | 1.62 | 1.03 | 0.96 | 0.99 | 0.89 |
| A-C-A-A-C | R-I  | acac | I  | Et <sub>3</sub> N  | H <sub>2</sub> O     | Et <sub>3</sub> N·HI   | 1    | 0.46 | 0.46 | 0.36 | 1    | 1.58 | 1.58 | 1.49 | 1.03 | 0.83 | 0.86 | 0.76 |
| A-C-A-A-D | R-I  | acac | I  | Et <sub>3</sub> N  | DMF/H <sub>2</sub> O | Et <sub>3</sub> N·HI   | 1    | 0.82 | 0.82 | 0.72 | 1    | 1.94 | 1.94 | 1.85 | 1.02 | 1.19 | 1.22 | 1.12 |
| A-C-A-A-E | R-I  | acac | I  | Et <sub>3</sub> N  | NMP/H <sub>2</sub> O | Et <sub>3</sub> N·HI   | 1    | 0.52 | 0.52 | 0.42 | 1    | 1.65 | 1.65 | 1.56 | 1.03 | 0.9  | 0.93 | 0.83 |
| A-C-A-B-A | R-I  | acac | I  | Et <sub>2</sub> NH | DMF                  | Et <sub>2</sub> NH·HI  | 0.66 | 1.88 | 1.23 | 1.13 | 0.85 | 2.72 | 2.31 | 2.21 | 0.65 | 2.42 | 1.58 | 1.48 |
| A-C-A-B-B | R-I  | acac | I  | Et <sub>2</sub> NH | NMP                  | Et <sub>2</sub> NH·HI  | 0.5  | 1.28 | 0.64 | 0.54 | 0.81 | 2.12 | 1.71 | 1.62 | 0.54 | 1.83 | 0.99 | 0.89 |
| A-C-A-B-C | R-I  | acac | I  | Et <sub>2</sub> NH | H <sub>2</sub> O     | Et <sub>2</sub> NH·HI  | 0.44 | 1.15 | 0.5  | 0.4  | 0.79 | 1.99 | 1.58 | 1.49 | 0.5  | 1.69 | 0.85 | 0.75 |
| A-C-A-B-D | R-I  | acac | I  | Et <sub>2</sub> NH | DMF/H <sub>2</sub> O | Et <sub>2</sub> NH·HI  | 0.57 | 1.51 | 0.87 | 0.77 | 0.82 | 2.35 | 1.94 | 1.85 | 0.59 | 2.06 | 1.22 | 1.12 |
| A-C-A-B-E | R-I  | acac | I  | Et <sub>2</sub> NH | NMP/H <sub>2</sub> O | Et <sub>2</sub> NH·HI  | 0.47 | 1.22 | 0.57 | 0.47 | 0.8  | 2.06 | 1.64 | 1.55 | 0.52 | 1.76 | 0.92 | 0.82 |
| A-C-B-A-A | R-I  | acac | Br | Et <sub>3</sub> N  | DMF                  | Et <sub>3</sub> N·HI   | 1    | 1.22 | 1.22 | 1.12 | 1    | 2.34 | 2.34 | 2.25 | 1.02 | 1.59 | 1.62 | 1.52 |
| A-C-B-A-B | R-I  | acac | Br | Et <sub>3</sub> N  | NMP                  | Et <sub>3</sub> N·HI   | 1    | 0.62 | 0.62 | 0.52 | 1    | 1.74 | 1.74 | 1.65 | 1.03 | 1    | 1.03 | 0.93 |
| A-C-B-A-C | R-I  | acac | Br | Et <sub>3</sub> N  | H <sub>2</sub> O     | Et <sub>3</sub> N·HI   | 1    | 0.49 | 0.49 | 0.39 | 1    | 1.61 | 1.61 | 1.52 | 1.03 | 0.86 | 0.89 | 0.79 |
| A-C-B-A-D | R-I  | acac | Br | Et <sub>3</sub> N  | DMF/H <sub>2</sub> O | Et <sub>3</sub> N·HI   | 1    | 0.85 | 0.85 | 0.75 | 1    | 1.97 | 1.97 | 1.88 | 1.02 | 1.23 | 1.26 | 1.16 |
| A-C-B-A-E | R-I  | acac | Br | Et <sub>3</sub> N  | NMP/H <sub>2</sub> O | Et <sub>3</sub> N·HI   | 1    | 0.55 | 0.55 | 0.45 | 1    | 1.68 | 1.68 | 1.58 | 1.03 | 0.93 | 0.96 | 0.86 |
| A-C-B-B-A | R-I  | acac | Br | Et <sub>2</sub> NH | DMF                  | Et <sub>2</sub> NH·HI  | 0.66 | 1.91 | 1.26 | 1.16 | 0.85 | 2.75 | 2.33 | 2.24 | 0.66 | 2.46 | 1.61 | 1.51 |
| A-C-B-B-B | R-I  | acac | Br | Et <sub>2</sub> NH | NMP                  | Et <sub>2</sub> NH·HI  | 0.51 | 1.31 | 0.67 | 0.57 | 0.81 | 2.15 | 1.74 | 1.65 | 0.55 | 1.86 | 1.02 | 0.92 |
| A-C-B-B-C | R-I  | acac | Br | Et <sub>2</sub> NH | H <sub>2</sub> O     | Et <sub>2</sub> NH·HI  | 0.45 | 1.18 | 0.53 | 0.43 | 0.8  | 2.02 | 1.61 | 1.51 | 0.51 | 1.73 | 0.89 | 0.79 |
| A-C-B-B-D | R-I  | acac | Br | Et <sub>2</sub> NH | DMF/H <sub>2</sub> O | Et <sub>2</sub> NH·HI  | 0.58 | 1.54 | 0.9  | 0.8  | 0.83 | 2.38 | 1.97 | 1.88 | 0.6  | 2.09 | 1.25 | 1.15 |
| A-C-B-B-E | R-I  | acac | Br | Et <sub>2</sub> NH | NMP/H <sub>2</sub> O | Et <sub>2</sub> NH·HI  | 0.48 | 1.25 | 0.6  | 0.5  | 0.8  | 2.09 | 1.67 | 1.58 | 0.53 | 1.79 | 0.95 | 0.85 |
| B-A-A-A-A | R-Br | OAc  | I  | Et <sub>3</sub> N  | DMF                  | Et <sub>3</sub> N·HBr  | 0.66 | 1.37 | 0.91 | 0.81 | 0.95 | 0.94 | 0.89 | 0.8  | 0.82 | 1.07 | 0.88 | 0.78 |
| B-A-A-A-B | R-Br | OAc  | I  | Et <sub>3</sub> N  | NMP                  | Et <sub>3</sub> N·HBr  | 0.4  | 0.78 | 0.31 | 0.21 | 0.86 | 0.35 | 0.3  | 0.21 | 0.59 | 0.48 | 0.28 | 0.18 |
| B-A-A-A-C | R-Br | OAc  | I  | Et <sub>3</sub> N  | H <sub>2</sub> O     | Et <sub>3</sub> N·HBr  | 0.27 | 0.65 | 0.18 | 0.08 | 0.77 | 0.22 | 0.17 | 0.08 | 0.43 | 0.35 | 0.15 | 0.05 |
| B-A-A-A-D | R-Br | OAc  | I  | Et <sub>3</sub> N  | DMF/H <sub>2</sub> O | Et <sub>3</sub> N·HBr  | 0.54 | 1.01 | 0.54 | 0.44 | 0.91 | 0.58 | 0.53 | 0.44 | 0.72 | 0.71 | 0.51 | 0.41 |
| B-A-A-A-E | R-Br | OAc  | I  | Et <sub>3</sub> N  | NMP/H <sub>2</sub> O | Et <sub>3</sub> N·HBr  | 0.34 | 0.71 | 0.24 | 0.14 | 0.82 | 0.28 | 0.23 | 0.14 | 0.52 | 0.41 | 0.22 | 0.12 |
| B-A-A-B-A | R-Br | OAc  | I  | Et <sub>2</sub> NH | DMF                  | Et <sub>2</sub> NH·HBr | 0.43 | 2.07 | 0.89 | 0.79 | 0.66 | 1.35 | 0.9  | 0.81 | 0.46 | 1.94 | 0.89 | 0.79 |
| B-A-A-B-B | R-Br | OAc  | I  | Et <sub>2</sub> NH | NMP                  | Et <sub>2</sub> NH·HBr | 0.2  | 1.47 | 0.3  | 0.2  | 0.4  | 0.76 | 0.31 | 0.21 | 0.22 | 1.34 | 0.3  | 0.2  |
| B-A-A-B-C | R-Br | OAc  | I  | Et <sub>2</sub> NH | H <sub>2</sub> O     | Et <sub>2</sub> NH·HBr | 0.12 | 1.34 | 0.17 | 0.07 | 0.27 | 0.63 | 0.17 | 0.08 | 0.13 | 1.21 | 0.16 | 0.06 |
| B-A-A-B-D | R-Br | OAc  | I  | Et <sub>2</sub> NH | DMF/H <sub>2</sub> O | Et <sub>2</sub> NH·HBr | 0.31 | 1.7  | 0.53 | 0.43 | 0.54 | 0.99 | 0.54 | 0.44 | 0.34 | 1.57 | 0.53 | 0.43 |
| B-A-A-B-E | R-Br | OAc  | I  | Et <sub>2</sub> NH | NMP/H <sub>2</sub> O | Et <sub>2</sub> NH·HBr | 0.17 | 1.4  | 0.23 | 0.13 | 0.34 | 0.69 | 0.24 | 0.15 | 0.18 | 1.28 | 0.23 | 0.13 |
| B-A-B-A-A | R-Br | OAc  | Br | Et <sub>3</sub> N  | DMF                  | Et <sub>3</sub> N·HBr  | 0.67 | 1.4  | 0.94 | 0.84 | 0.95 | 0.97 | 0.92 | 0.83 | 0.82 | 1.11 | 0.91 | 0.81 |
| B-A-B-A-B | R-Br | OAc  | Br | Et <sub>3</sub> N  | NMP                  | Et <sub>3</sub> N·HBr  | 0.42 | 0.81 | 0.34 | 0.24 | 0.87 | 0.38 | 0.33 | 0.24 | 0.62 | 0.51 | 0.32 | 0.22 |
| B-A-B-A-C | R-Br | OAc  | Br | Et <sub>3</sub> N  | H <sub>2</sub> O     | Et <sub>3</sub> N·HBr  | 0.31 | 0.68 | 0.21 | 0.11 | 0.8  | 0.24 | 0.19 | 0.1  | 0.48 | 0.38 | 0.18 | 0.08 |
| B-A-B-A-D | R-Br | OAc  | Br | Et <sub>3</sub> N  | DMF/H <sub>2</sub> O | Et <sub>3</sub> N·HBr  | 0.55 | 1.04 | 0.57 | 0.47 | 0.92 | 0.61 | 0.56 | 0.47 | 0.74 | 0.74 | 0.55 | 0.45 |
| B-A-B-A-E | R-Br | OAc  | Br | Et <sub>3</sub> N  | NMP/H <sub>2</sub> O | Et <sub>3</sub> N·HBr  | 0.37 | 0.74 | 0.27 | 0.17 | 0.84 | 0.31 | 0.26 | 0.17 | 0.56 | 0.45 | 0.25 | 0.15 |
| B-A-B-B-A | R-Br | OAc  | Br | Et <sub>2</sub> NH | DMF                  | Et <sub>2</sub> NH·HBr | 0.44 | 2.1  | 0.92 | 0.82 | 0.67 | 1.38 | 0.93 | 0.84 | 0.47 | 1.97 | 0.93 | 0.83 |
| B-A-B-B-B | R-Br | OAc  | Br | Et <sub>2</sub> NH | NMP                  | Et <sub>2</sub> NH·HBr | 0.22 | 1.5  | 0.33 | 0.23 | 0.42 | 0.79 | 0.33 | 0.24 | 0.24 | 1.38 | 0.33 | 0.23 |
| B-A-B-B-C | R-Br | OAc  | Br | Et <sub>2</sub> NH | H <sub>2</sub> O     | Et <sub>2</sub> NH·HBr | 0.14 | 1.37 | 0.2  | 0.1  | 0.31 | 0.65 | 0.2  | 0.11 | 0.16 | 1.24 | 0.2  | 0.1  |
| B-A-B-B-D | R-Br | OAc  | Br | Et <sub>2</sub> NH | DMF/H <sub>2</sub> O | Et <sub>2</sub> NH·HBr | 0.32 | 1.73 | 0.56 | 0.46 | 0.55 | 1.02 | 0.56 | 0.47 | 0.35 | 1.61 | 0.56 | 0.46 |
| B-A-B-B-E | R-Br | OAc  | Br | Et <sub>2</sub> NH | NMP/H <sub>2</sub> O | Et <sub>2</sub> NH·HBr | 0.18 | 1.43 | 0.26 | 0.16 | 0.37 | 0.72 | 0.27 | 0.18 | 0.2  | 1.31 | 0.27 | 0.17 |
| B-B-A-A-A | R-Br | Cl   | I  | Et <sub>3</sub> N  | DMF                  | Et <sub>3</sub> N·HBr  | 0.66 | 1.38 | 0.91 | 0.81 | 0.95 | 0.96 | 0.91 | 0.82 | 0.82 | 1.08 | 0.88 | 0.78 |
| B-B-A-A-B | R-Br | Cl   | I  | Et <sub>3</sub> N  | NMP                  | Et <sub>3</sub> N·HBr  | 0.4  | 0.79 | 0.32 | 0.22 | 0.86 | 0.36 | 0.31 | 0.22 | 0.59 | 0.48 | 0.29 | 0.19 |
| B-B-A-A-C | R-Br | Cl   | I  | Et <sub>3</sub> N  | H <sub>2</sub> O     | Et <sub>3</sub> N·HBr  | 0.28 | 0.65 | 0.18 | 0.08 | 0.78 | 0.23 | 0.18 | 0.09 | 0.44 | 0.35 | 0.15 | 0.05 |
| B-B-A-A-D | R-Br | Cl   | I  | Et <sub>3</sub> N  | DMF/H <sub>2</sub> O | Et <sub>3</sub> N·HBr  | 0.54 | 1.02 | 0.55 | 0.45 | 0.92 | 0.59 | 0.54 | 0.45 | 0.73 | 0.71 | 0.52 | 0.42 |
| B-B-A-A-E | R-Br | Cl   | I  | Et <sub>3</sub> N  | NMP/H <sub>2</sub> O | Et <sub>3</sub> N·HBr  | 0.35 | 0.72 | 0.25 | 0.15 | 0.83 | 0.3  | 0.25 | 0.15 | 0.53 | 0.42 | 0.22 | 0.12 |
| B-B-A-B-A | R-Br | Cl   | I  | Et <sub>2</sub> NH | DMF                  | Et <sub>2</sub> NH·HBr | 0.43 | 2.07 | 0.9  | 0.8  | 0.67 | 1.37 | 0.91 | 0.82 | 0.46 | 1.94 | 0.9  | 0.8  |

|           |      |      |    |                    |                      |                        |      |      |      |      |      |      |      |      |      |      |      |      |
|-----------|------|------|----|--------------------|----------------------|------------------------|------|------|------|------|------|------|------|------|------|------|------|------|
| B-B-A-B-B | R-Br | Cl   | I  | Et <sub>2</sub> NH | NMP                  | Et <sub>2</sub> NH·HBr | 0.21 | 1.48 | 0.3  | 0.2  | 0.41 | 0.77 | 0.32 | 0.23 | 0.22 | 1.35 | 0.3  | 0.2  |
| B-B-A-B-C | R-Br | Cl   | I  | Et <sub>2</sub> NH | H <sub>2</sub> O     | Et <sub>2</sub> NH·HBr | 0.13 | 1.34 | 0.17 | 0.07 | 0.29 | 0.64 | 0.18 | 0.09 | 0.14 | 1.21 | 0.17 | 0.07 |
| B-B-A-B-D | R-Br | Cl   | I  | Et <sub>2</sub> NH | DMF/H <sub>2</sub> O | Et <sub>2</sub> NH·HBr | 0.31 | 1.71 | 0.54 | 0.44 | 0.55 | 1    | 0.55 | 0.46 | 0.34 | 1.58 | 0.53 | 0.43 |
| B-B-A-B-E | R-Br | Cl   | I  | Et <sub>2</sub> NH | NMP/H <sub>2</sub> O | Et <sub>2</sub> NH·HBr | 0.17 | 1.41 | 0.24 | 0.14 | 0.36 | 0.7  | 0.25 | 0.16 | 0.18 | 1.28 | 0.23 | 0.13 |
| B-B-B-A-A | R-Br | Cl   | Br | Et <sub>3</sub> N  | DMF                  | Et <sub>3</sub> N·HBr  | 0.67 | 1.41 | 0.94 | 0.84 | 0.95 | 0.98 | 0.93 | 0.84 | 0.82 | 1.11 | 0.92 | 0.82 |
| B-B-B-A-B | R-Br | Cl   | Br | Et <sub>3</sub> N  | NMP                  | Et <sub>3</sub> N·HBr  | 0.42 | 0.82 | 0.35 | 0.25 | 0.87 | 0.39 | 0.34 | 0.25 | 0.62 | 0.52 | 0.32 | 0.22 |
| B-B-B-A-C | R-Br | Cl   | Br | Et <sub>3</sub> N  | H <sub>2</sub> O     | Et <sub>3</sub> N·HBr  | 0.31 | 0.68 | 0.21 | 0.11 | 0.81 | 0.26 | 0.21 | 0.12 | 0.49 | 0.39 | 0.19 | 0.09 |
| B-B-B-A-D | R-Br | Cl   | Br | Et <sub>3</sub> N  | DMF/H <sub>2</sub> O | Et <sub>3</sub> N·HBr  | 0.55 | 1.05 | 0.58 | 0.48 | 0.92 | 0.62 | 0.57 | 0.48 | 0.74 | 0.75 | 0.55 | 0.45 |
| B-B-B-A-E | R-Br | Cl   | Br | Et <sub>3</sub> N  | NMP/H <sub>2</sub> O | Et <sub>3</sub> N·HBr  | 0.37 | 0.75 | 0.28 | 0.18 | 0.85 | 0.32 | 0.27 | 0.18 | 0.57 | 0.45 | 0.26 | 0.16 |
| B-B-B-B-A | R-Br | Cl   | Br | Et <sub>2</sub> NH | DMF                  | Et <sub>2</sub> NH·HBr | 0.44 | 2.1  | 0.93 | 0.83 | 0.67 | 1.39 | 0.94 | 0.85 | 0.47 | 1.98 | 0.93 | 0.83 |
| B-B-B-B-B | R-Br | Cl   | Br | Et <sub>2</sub> NH | NMP                  | Et <sub>2</sub> NH·HBr | 0.22 | 1.51 | 0.33 | 0.23 | 0.43 | 0.8  | 0.35 | 0.25 | 0.24 | 1.38 | 0.34 | 0.24 |
| B-B-B-B-C | R-Br | Cl   | Br | Et <sub>2</sub> NH | H <sub>2</sub> O     | Et <sub>2</sub> NH·HBr | 0.15 | 1.37 | 0.2  | 0.1  | 0.32 | 0.67 | 0.21 | 0.12 | 0.16 | 1.25 | 0.2  | 0.1  |
| B-B-B-B-D | R-Br | Cl   | Br | Et <sub>2</sub> NH | DMF/H <sub>2</sub> O | Et <sub>2</sub> NH·HBr | 0.33 | 1.74 | 0.56 | 0.46 | 0.56 | 1.03 | 0.58 | 0.48 | 0.35 | 1.61 | 0.57 | 0.47 |
| B-B-B-B-E | R-Br | Cl   | Br | Et <sub>2</sub> NH | NMP/H <sub>2</sub> O | Et <sub>2</sub> NH·HBr | 0.19 | 1.44 | 0.27 | 0.17 | 0.38 | 0.73 | 0.28 | 0.19 | 0.21 | 1.32 | 0.27 | 0.17 |
| B-C-A-A-A | R-Br | acac | I  | Et <sub>3</sub> N  | DMF                  | Et <sub>3</sub> N·HBr  | 0.71 | 1.64 | 1.17 | 1.07 | 0.98 | 2.36 | 2.31 | 2.22 | 0.89 | 1.78 | 1.58 | 1.48 |
| B-C-A-A-B | R-Br | acac | I  | Et <sub>3</sub> N  | NMP                  | Et <sub>3</sub> N·HBr  | 0.55 | 1.04 | 0.57 | 0.47 | 0.97 | 1.76 | 1.71 | 1.62 | 0.83 | 1.18 | 0.99 | 0.89 |
| B-C-A-A-C | R-Br | acac | I  | Et <sub>3</sub> N  | H <sub>2</sub> O     | Et <sub>3</sub> N·HBr  | 0.48 | 0.91 | 0.44 | 0.34 | 0.97 | 1.63 | 1.58 | 1.49 | 0.81 | 1.05 | 0.85 | 0.75 |
| B-C-A-A-D | R-Br | acac | I  | Et <sub>3</sub> N  | DMF/H <sub>2</sub> O | Et <sub>3</sub> N·HBr  | 0.63 | 1.27 | 0.8  | 0.7  | 0.97 | 1.99 | 1.94 | 1.85 | 0.86 | 1.41 | 1.22 | 1.12 |
| B-C-A-A-E | R-Br | acac | I  | Et <sub>3</sub> N  | NMP/H <sub>2</sub> O | Et <sub>3</sub> N·HBr  | 0.52 | 0.97 | 0.5  | 0.4  | 0.97 | 1.7  | 1.65 | 1.56 | 0.82 | 1.12 | 0.92 | 0.82 |
| B-C-A-B-A | R-Br | acac | I  | Et <sub>2</sub> NH | DMF                  | Et <sub>2</sub> NH·HBr | 0.5  | 2.33 | 1.15 | 1.05 | 0.84 | 2.77 | 2.31 | 2.22 | 0.6  | 2.64 | 1.6  | 1.5  |
| B-C-A-B-B | R-Br | acac | I  | Et <sub>2</sub> NH | NMP                  | Et <sub>2</sub> NH·HBr | 0.32 | 1.73 | 0.56 | 0.46 | 0.79 | 2.17 | 1.72 | 1.63 | 0.49 | 2.05 | 1    | 0.9  |
| B-C-A-B-C | R-Br | acac | I  | Et <sub>2</sub> NH | H <sub>2</sub> O     | Et <sub>2</sub> NH·HBr | 0.27 | 1.6  | 0.43 | 0.33 | 0.78 | 2.04 | 1.59 | 1.5  | 0.45 | 1.91 | 0.87 | 0.77 |
| B-C-A-B-D | R-Br | acac | I  | Et <sub>2</sub> NH | DMF/H <sub>2</sub> O | Et <sub>2</sub> NH·HBr | 0.4  | 1.96 | 0.79 | 0.69 | 0.81 | 2.4  | 1.95 | 1.86 | 0.54 | 2.28 | 1.23 | 1.13 |
| B-C-A-B-E | R-Br | acac | I  | Et <sub>2</sub> NH | NMP/H <sub>2</sub> O | Et <sub>2</sub> NH·HBr | 0.3  | 1.67 | 0.49 | 0.39 | 0.78 | 2.11 | 1.65 | 1.56 | 0.47 | 1.98 | 0.94 | 0.84 |
| B-C-B-A-A | R-Br | acac | Br | Et <sub>3</sub> N  | DMF                  | Et <sub>3</sub> N·HBr  | 0.72 | 1.67 | 1.2  | 1.1  | 0.98 | 2.39 | 2.34 | 2.25 | 0.89 | 1.81 | 1.62 | 1.52 |
| B-C-B-A-B | R-Br | acac | Br | Et <sub>3</sub> N  | NMP                  | Et <sub>3</sub> N·HBr  | 0.56 | 1.07 | 0.6  | 0.5  | 0.97 | 1.79 | 1.74 | 1.65 | 0.84 | 1.22 | 1.02 | 0.92 |
| B-C-B-A-C | R-Br | acac | Br | Et <sub>3</sub> N  | H <sub>2</sub> O     | Et <sub>3</sub> N·HBr  | 0.5  | 0.94 | 0.47 | 0.37 | 0.97 | 1.66 | 1.61 | 1.52 | 0.82 | 1.09 | 0.89 | 0.79 |
| B-C-B-A-D | R-Br | acac | Br | Et <sub>3</sub> N  | DMF/H <sub>2</sub> O | Et <sub>3</sub> N·HBr  | 0.64 | 1.3  | 0.83 | 0.73 | 0.98 | 2.02 | 1.97 | 1.88 | 0.86 | 1.45 | 1.25 | 1.15 |
| B-C-B-A-E | R-Br | acac | Br | Et <sub>3</sub> N  | NMP/H <sub>2</sub> O | Et <sub>3</sub> N·HBr  | 0.53 | 1    | 0.53 | 0.43 | 0.97 | 1.73 | 1.68 | 1.59 | 0.83 | 1.15 | 0.96 | 0.86 |
| B-C-B-B-A | R-Br | acac | Br | Et <sub>2</sub> NH | DMF                  | Et <sub>2</sub> NH·HBr | 0.5  | 2.36 | 1.18 | 1.08 | 0.84 | 2.8  | 2.34 | 2.25 | 0.61 | 2.68 | 1.63 | 1.53 |
| B-C-B-B-B | R-Br | acac | Br | Et <sub>2</sub> NH | NMP                  | Et <sub>2</sub> NH·HBr | 0.34 | 1.76 | 0.59 | 0.49 | 0.79 | 2.2  | 1.75 | 1.66 | 0.5  | 2.08 | 1.04 | 0.94 |
| B-C-B-B-C | R-Br | acac | Br | Et <sub>2</sub> NH | H <sub>2</sub> O     | Et <sub>2</sub> NH·HBr | 0.28 | 1.63 | 0.46 | 0.36 | 0.78 | 2.07 | 1.61 | 1.52 | 0.46 | 1.95 | 0.9  | 0.8  |
| B-C-B-B-D | R-Br | acac | Br | Et <sub>2</sub> NH | DMF/H <sub>2</sub> O | Et <sub>2</sub> NH·HBr | 0.41 | 1.99 | 0.82 | 0.72 | 0.81 | 2.43 | 1.98 | 1.89 | 0.55 | 2.31 | 1.27 | 1.17 |
| B-C-B-B-E | R-Br | acac | Br | Et <sub>2</sub> NH | NMP/H <sub>2</sub> O | Et <sub>2</sub> NH·HBr | 0.31 | 1.7  | 0.52 | 0.42 | 0.79 | 2.14 | 1.68 | 1.59 | 0.48 | 2.02 | 0.97 | 0.87 |
| C-A-A-A-A | R-Cl | OAc  | I  | Et <sub>3</sub> N  | DMF                  | Et <sub>3</sub> N·HCl  | 0.98 | 0.94 | 0.92 | 0.82 | 0.96 | 0.93 | 0.89 | 0.8  | 1.04 | 0.85 | 0.89 | 0.79 |
| C-A-A-A-B | R-Cl | OAc  | I  | Et <sub>3</sub> N  | NMP                  | Et <sub>3</sub> N·HCl  | 0.95 | 0.34 | 0.33 | 0.23 | 0.88 | 0.33 | 0.29 | 0.2  | 1.14 | 0.26 | 0.29 | 0.19 |
| C-A-A-A-C | R-Cl | OAc  | I  | Et <sub>3</sub> N  | H <sub>2</sub> O     | Et <sub>3</sub> N·HCl  | 0.92 | 0.21 | 0.19 | 0.09 | 0.79 | 0.2  | 0.16 | 0.07 | 1.28 | 0.13 | 0.16 | 0.06 |
| C-A-A-A-D | R-Cl | OAc  | I  | Et <sub>3</sub> N  | DMF/H <sub>2</sub> O | Et <sub>3</sub> N·HCl  | 0.97 | 0.57 | 0.56 | 0.46 | 0.93 | 0.56 | 0.52 | 0.43 | 1.07 | 0.49 | 0.52 | 0.42 |
| C-A-A-A-E | R-Cl | OAc  | I  | Et <sub>3</sub> N  | NMP/H <sub>2</sub> O | Et <sub>3</sub> N·HCl  | 0.94 | 0.28 | 0.26 | 0.16 | 0.85 | 0.27 | 0.23 | 0.14 | 1.18 | 0.19 | 0.23 | 0.13 |
| C-A-A-B-A | R-Cl | OAc  | I  | Et <sub>2</sub> NH | DMF                  | Et <sub>2</sub> NH·HCl | 0.58 | 1.63 | 0.95 | 0.85 | 0.66 | 1.34 | 0.89 | 0.8  | 0.51 | 1.72 | 0.88 | 0.78 |
| C-A-A-B-B | R-Cl | OAc  | I  | Et <sub>2</sub> NH | NMP                  | Et <sub>2</sub> NH·HCl | 0.34 | 1.03 | 0.35 | 0.25 | 0.39 | 0.74 | 0.29 | 0.2  | 0.25 | 1.12 | 0.28 | 0.18 |
| C-A-A-B-C | R-Cl | OAc  | I  | Et <sub>2</sub> NH | H <sub>2</sub> O     | Et <sub>2</sub> NH·HCl | 0.24 | 0.9  | 0.22 | 0.12 | 0.26 | 0.61 | 0.16 | 0.07 | 0.15 | 0.99 | 0.15 | 0.05 |
| C-A-A-B-D | R-Cl | OAc  | I  | Et <sub>2</sub> NH | DMF/H <sub>2</sub> O | Et <sub>2</sub> NH·HCl | 0.46 | 1.26 | 0.58 | 0.48 | 0.54 | 0.97 | 0.52 | 0.43 | 0.38 | 1.35 | 0.51 | 0.41 |
| C-A-A-B-E | R-Cl | OAc  | I  | Et <sub>2</sub> NH | NMP/H <sub>2</sub> O | Et <sub>2</sub> NH·HCl | 0.29 | 0.97 | 0.28 | 0.18 | 0.33 | 0.68 | 0.23 | 0.13 | 0.2  | 1.06 | 0.21 | 0.11 |
| C-A-B-A-A | R-Cl | OAc  | Br | Et <sub>3</sub> N  | DMF                  | Et <sub>3</sub> N·HCl  | 0.98 | 0.97 | 0.95 | 0.85 | 0.96 | 0.96 | 0.92 | 0.82 | 1.04 | 0.89 | 0.92 | 0.82 |

|           |      |      |    |                    |                      |                        |      |      |      |      |      |      |      |      |      |      |      |      |
|-----------|------|------|----|--------------------|----------------------|------------------------|------|------|------|------|------|------|------|------|------|------|------|------|
| C-A-B-A-B | R-Cl | OAc  | Br | Et <sub>3</sub> N  | NMP                  | Et <sub>3</sub> N·HCl  | 0.96 | 0.37 | 0.36 | 0.26 | 0.89 | 0.36 | 0.32 | 0.23 | 1.12 | 0.29 | 0.33 | 0.23 |
| C-A-B-A-C | R-Cl | OAc  | Br | Et <sub>3</sub> N  | H <sub>2</sub> O     | Et <sub>3</sub> N·HCl  | 0.93 | 0.24 | 0.22 | 0.12 | 0.82 | 0.23 | 0.19 | 0.1  | 1.22 | 0.16 | 0.2  | 0.1  |
| C-A-B-A-D | R-Cl | OAc  | Br | Et <sub>3</sub> N  | DMF/H <sub>2</sub> O | Et <sub>3</sub> N·HCl  | 0.97 | 0.6  | 0.59 | 0.49 | 0.93 | 0.59 | 0.55 | 0.46 | 1.07 | 0.52 | 0.56 | 0.46 |
| C-A-B-A-E | R-Cl | OAc  | Br | Et <sub>3</sub> N  | NMP/H <sub>2</sub> O | Et <sub>3</sub> N·HCl  | 0.95 | 0.31 | 0.29 | 0.19 | 0.86 | 0.3  | 0.25 | 0.16 | 1.15 | 0.23 | 0.26 | 0.16 |
| C-A-B-B-A | R-Cl | OAc  | Br | Et <sub>2</sub> NH | DMF                  | Et <sub>2</sub> NH·HCl | 0.59 | 1.66 | 0.98 | 0.88 | 0.67 | 1.37 | 0.91 | 0.82 | 0.52 | 1.75 | 0.91 | 0.81 |
| C-A-B-B-B | R-Cl | OAc  | Br | Et <sub>2</sub> NH | NMP                  | Et <sub>2</sub> NH·HCl | 0.36 | 1.06 | 0.38 | 0.28 | 0.42 | 0.77 | 0.32 | 0.23 | 0.27 | 1.16 | 0.32 | 0.22 |
| C-A-B-B-C | R-Cl | OAc  | Br | Et <sub>2</sub> NH | H <sub>2</sub> O     | Et <sub>2</sub> NH·HCl | 0.27 | 0.93 | 0.25 | 0.15 | 0.29 | 0.64 | 0.19 | 0.1  | 0.18 | 1.02 | 0.18 | 0.08 |
| C-A-B-B-D | R-Cl | OAc  | Br | Et <sub>2</sub> NH | DMF/H <sub>2</sub> O | Et <sub>2</sub> NH·HCl | 0.47 | 1.29 | 0.61 | 0.51 | 0.55 | 1    | 0.55 | 0.46 | 0.39 | 1.39 | 0.55 | 0.45 |
| C-A-B-B-E | R-Cl | OAc  | Br | Et <sub>2</sub> NH | NMP/H <sub>2</sub> O | Et <sub>2</sub> NH·HCl | 0.32 | 1    | 0.31 | 0.21 | 0.36 | 0.71 | 0.25 | 0.16 | 0.23 | 1.09 | 0.25 | 0.15 |
| C-B-A-A-A | R-Cl | Cl   | I  | Et <sub>3</sub> N  | DMF                  | Et <sub>3</sub> N·HCl  | 0.98 | 0.94 | 0.93 | 0.83 | 0.96 | 0.94 | 0.9  | 0.81 | 1.04 | 0.86 | 0.89 | 0.79 |
| C-B-A-A-B | R-Cl | Cl   | I  | Et <sub>3</sub> N  | NMP                  | Et <sub>3</sub> N·HCl  | 0.95 | 0.35 | 0.33 | 0.23 | 0.88 | 0.35 | 0.31 | 0.21 | 1.13 | 0.26 | 0.3  | 0.2  |
| C-B-A-A-C | R-Cl | Cl   | I  | Et <sub>3</sub> N  | H <sub>2</sub> O     | Et <sub>3</sub> N·HCl  | 0.93 | 0.21 | 0.2  | 0.1  | 0.8  | 0.21 | 0.17 | 0.08 | 1.27 | 0.13 | 0.17 | 0.07 |
| C-B-A-A-D | R-Cl | Cl   | I  | Et <sub>3</sub> N  | DMF/H <sub>2</sub> O | Et <sub>3</sub> N·HCl  | 0.97 | 0.58 | 0.56 | 0.46 | 0.93 | 0.58 | 0.54 | 0.44 | 1.07 | 0.49 | 0.53 | 0.43 |
| C-B-A-A-E | R-Cl | Cl   | I  | Et <sub>3</sub> N  | NMP/H <sub>2</sub> O | Et <sub>3</sub> N·HCl  | 0.94 | 0.28 | 0.26 | 0.16 | 0.85 | 0.28 | 0.24 | 0.15 | 1.18 | 0.2  | 0.23 | 0.13 |
| C-B-A-B-A | R-Cl | Cl   | I  | Et <sub>2</sub> NH | DMF                  | Et <sub>2</sub> NH·HCl | 0.58 | 1.63 | 0.95 | 0.85 | 0.67 | 1.35 | 0.9  | 0.81 | 0.51 | 1.72 | 0.88 | 0.78 |
| C-B-A-B-B | R-Cl | Cl   | I  | Et <sub>2</sub> NH | NMP                  | Et <sub>2</sub> NH·HCl | 0.34 | 1.04 | 0.36 | 0.26 | 0.4  | 0.76 | 0.3  | 0.21 | 0.25 | 1.13 | 0.29 | 0.19 |
| C-B-A-B-C | R-Cl | Cl   | I  | Et <sub>2</sub> NH | H <sub>2</sub> O     | Et <sub>2</sub> NH·HCl | 0.25 | 0.91 | 0.22 | 0.12 | 0.27 | 0.62 | 0.17 | 0.08 | 0.15 | 0.99 | 0.15 | 0.05 |
| C-B-A-B-D | R-Cl | Cl   | I  | Et <sub>2</sub> NH | DMF/H <sub>2</sub> O | Et <sub>2</sub> NH·HCl | 0.46 | 1.27 | 0.59 | 0.49 | 0.54 | 0.99 | 0.53 | 0.44 | 0.38 | 1.36 | 0.52 | 0.42 |
| C-B-A-B-E | R-Cl | Cl   | I  | Et <sub>2</sub> NH | NMP/H <sub>2</sub> O | Et <sub>2</sub> NH·HCl | 0.3  | 0.97 | 0.29 | 0.19 | 0.34 | 0.69 | 0.24 | 0.15 | 0.21 | 1.06 | 0.22 | 0.12 |
| C-B-B-A-A | R-Cl | Cl   | Br | Et <sub>3</sub> N  | DMF                  | Et <sub>3</sub> N·HCl  | 0.98 | 0.97 | 0.96 | 0.86 | 0.96 | 0.97 | 0.93 | 0.84 | 1.04 | 0.89 | 0.93 | 0.83 |
| C-B-B-A-B | R-Cl | Cl   | Br | Et <sub>3</sub> N  | NMP                  | Et <sub>3</sub> N·HCl  | 0.96 | 0.38 | 0.36 | 0.26 | 0.89 | 0.37 | 0.33 | 0.24 | 1.12 | 0.3  | 0.33 | 0.23 |
| C-B-B-A-C | R-Cl | Cl   | Br | Et <sub>3</sub> N  | H <sub>2</sub> O     | Et <sub>3</sub> N·HCl  | 0.93 | 0.24 | 0.23 | 0.13 | 0.83 | 0.24 | 0.2  | 0.11 | 1.21 | 0.17 | 0.2  | 0.1  |
| C-B-B-A-D | R-Cl | Cl   | Br | Et <sub>3</sub> N  | DMF/H <sub>2</sub> O | Et <sub>3</sub> N·HCl  | 0.97 | 0.61 | 0.59 | 0.49 | 0.93 | 0.61 | 0.56 | 0.47 | 1.07 | 0.53 | 0.56 | 0.46 |
| C-B-B-A-E | R-Cl | Cl   | Br | Et <sub>3</sub> N  | NMP/H <sub>2</sub> O | Et <sub>3</sub> N·HCl  | 0.95 | 0.31 | 0.29 | 0.19 | 0.87 | 0.31 | 0.27 | 0.18 | 1.15 | 0.23 | 0.27 | 0.17 |
| C-B-B-B-A | R-Cl | Cl   | Br | Et <sub>2</sub> NH | DMF                  | Et <sub>2</sub> NH·HCl | 0.59 | 1.66 | 0.98 | 0.88 | 0.67 | 1.38 | 0.93 | 0.84 | 0.52 | 1.76 | 0.92 | 0.82 |
| C-B-B-B-B | R-Cl | Cl   | Br | Et <sub>2</sub> NH | NMP                  | Et <sub>2</sub> NH·HCl | 0.36 | 1.07 | 0.39 | 0.29 | 0.42 | 0.78 | 0.33 | 0.24 | 0.28 | 1.16 | 0.32 | 0.22 |
| C-B-B-B-C | R-Cl | Cl   | Br | Et <sub>2</sub> NH | H <sub>2</sub> O     | Et <sub>2</sub> NH·HCl | 0.27 | 0.93 | 0.25 | 0.15 | 0.31 | 0.65 | 0.2  | 0.11 | 0.18 | 1.03 | 0.19 | 0.09 |
| C-B-B-B-D | R-Cl | Cl   | Br | Et <sub>2</sub> NH | DMF/H <sub>2</sub> O | Et <sub>2</sub> NH·HCl | 0.47 | 1.3  | 0.62 | 0.52 | 0.55 | 1.01 | 0.56 | 0.47 | 0.4  | 1.39 | 0.55 | 0.45 |
| C-B-B-B-E | R-Cl | Cl   | Br | Et <sub>2</sub> NH | NMP/H <sub>2</sub> O | Et <sub>2</sub> NH·HCl | 0.32 | 1    | 0.32 | 0.22 | 0.37 | 0.72 | 0.27 | 0.17 | 0.23 | 1.1  | 0.25 | 0.15 |
| C-C-A-A-A | R-Cl | acac | I  | Et <sub>3</sub> N  | DMF                  | Et <sub>3</sub> N·HCl  | 0.99 | 1.2  | 1.18 | 1.08 | 0.98 | 2.34 | 2.3  | 2.21 | 1.02 | 1.56 | 1.59 | 1.49 |
| C-C-A-A-B | R-Cl | acac | I  | Et <sub>3</sub> N  | NMP                  | Et <sub>3</sub> N·HCl  | 0.97 | 0.6  | 0.59 | 0.49 | 0.98 | 1.75 | 1.71 | 1.62 | 1.04 | 0.96 | 1    | 0.9  |
| C-C-A-A-C | R-Cl | acac | I  | Et <sub>3</sub> N  | H <sub>2</sub> O     | Et <sub>3</sub> N·HCl  | 0.97 | 0.47 | 0.45 | 0.35 | 0.97 | 1.62 | 1.57 | 1.48 | 1.04 | 0.83 | 0.87 | 0.77 |
| C-C-A-A-D | R-Cl | acac | I  | Et <sub>3</sub> N  | DMF/H <sub>2</sub> O | Et <sub>3</sub> N·HCl  | 0.98 | 0.83 | 0.82 | 0.72 | 0.98 | 1.98 | 1.94 | 1.85 | 1.03 | 1.19 | 1.23 | 1.13 |
| C-C-A-A-E | R-Cl | acac | I  | Et <sub>3</sub> N  | NMP/H <sub>2</sub> O | Et <sub>3</sub> N·HCl  | 0.97 | 0.54 | 0.52 | 0.42 | 0.98 | 1.68 | 1.64 | 1.55 | 1.04 | 0.9  | 0.93 | 0.83 |
| C-C-A-B-A | R-Cl | acac | I  | Et <sub>2</sub> NH | DMF                  | Et <sub>2</sub> NH·HCl | 0.64 | 1.89 | 1.21 | 1.11 | 0.84 | 2.75 | 2.3  | 2.21 | 0.65 | 2.42 | 1.58 | 1.48 |
| C-C-A-B-B | R-Cl | acac | I  | Et <sub>2</sub> NH | NMP                  | Et <sub>2</sub> NH·HCl | 0.47 | 1.29 | 0.61 | 0.51 | 0.79 | 2.16 | 1.71 | 1.62 | 0.54 | 1.83 | 0.99 | 0.89 |
| C-C-A-B-C | R-Cl | acac | I  | Et <sub>2</sub> NH | H <sub>2</sub> O     | Et <sub>2</sub> NH·HCl | 0.41 | 1.16 | 0.48 | 0.38 | 0.78 | 2.02 | 1.57 | 1.48 | 0.5  | 1.69 | 0.85 | 0.75 |
| C-C-A-B-D | R-Cl | acac | I  | Et <sub>2</sub> NH | DMF/H <sub>2</sub> O | Et <sub>2</sub> NH·HCl | 0.55 | 1.53 | 0.84 | 0.74 | 0.81 | 2.39 | 1.94 | 1.85 | 0.59 | 2.06 | 1.22 | 1.12 |
| C-C-A-B-E | R-Cl | acac | I  | Et <sub>2</sub> NH | NMP/H <sub>2</sub> O | Et <sub>2</sub> NH·HCl | 0.44 | 1.23 | 0.55 | 0.45 | 0.78 | 2.09 | 1.64 | 1.55 | 0.52 | 1.76 | 0.92 | 0.82 |
| C-C-B-A-A | R-Cl | acac | Br | Et <sub>3</sub> N  | DMF                  | Et <sub>3</sub> N·HCl  | 0.99 | 1.23 | 1.21 | 1.11 | 0.98 | 2.37 | 2.33 | 2.24 | 1.02 | 1.59 | 1.63 | 1.53 |
| C-C-B-A-B | R-Cl | acac | Br | Et <sub>3</sub> N  | NMP                  | Et <sub>3</sub> N·HCl  | 0.97 | 0.63 | 0.62 | 0.52 | 0.98 | 1.78 | 1.74 | 1.65 | 1.04 | 1    | 1.04 | 0.94 |
| C-C-B-A-C | R-Cl | acac | Br | Et <sub>3</sub> N  | H <sub>2</sub> O     | Et <sub>3</sub> N·HCl  | 0.97 | 0.5  | 0.48 | 0.38 | 0.97 | 1.64 | 1.6  | 1.51 | 1.04 | 0.87 | 0.9  | 0.8  |
| C-C-B-A-D | R-Cl | acac | Br | Et <sub>3</sub> N  | DMF/H <sub>2</sub> O | Et <sub>3</sub> N·HCl  | 0.98 | 0.86 | 0.85 | 0.75 | 0.98 | 2.01 | 1.97 | 1.88 | 1.03 | 1.23 | 1.27 | 1.17 |
| C-C-B-A-E | R-Cl | acac | Br | Et <sub>3</sub> N  | NMP/H <sub>2</sub> O | Et <sub>3</sub> N·HCl  | 0.97 | 0.57 | 0.55 | 0.45 | 0.98 | 1.71 | 1.67 | 1.58 | 1.04 | 0.93 | 0.97 | 0.87 |
| C-C-B-B-A | R-Cl | acac | Br | Et <sub>2</sub> NH | DMF                  | Et <sub>2</sub> NH·HCl | 0.64 | 1.92 | 1.24 | 1.14 | 0.84 | 2.78 | 2.33 | 2.24 | 0.66 | 2.46 | 1.62 | 1.52 |



|           |      |      |    |                    |                      |                        |      |      |      |      |      |      |      |      |      |      |      |      |
|-----------|------|------|----|--------------------|----------------------|------------------------|------|------|------|------|------|------|------|------|------|------|------|------|
| C-C-B-B-B | R-Cl | acac | Br | Et <sub>2</sub> NH | NMP                  | Et <sub>2</sub> NH·HCl | 0.48 | 1.32 | 0.64 | 0.54 | 0.79 | 2.19 | 1.73 | 1.64 | 0.55 | 1.86 | 1.02 | 0.92 |
| C-C-B-B-C | R-Cl | acac | Br | Et <sub>2</sub> NH | H <sub>2</sub> O     | Et <sub>2</sub> NH·HCl | 0.43 | 1.19 | 0.51 | 0.41 | 0.78 | 2.05 | 1.6  | 1.51 | 0.51 | 1.73 | 0.89 | 0.79 |
| C-C-B-B-D | R-Cl | acac | Br | Et <sub>2</sub> NH | DMF/H <sub>2</sub> O | Et <sub>2</sub> NH·HCl | 0.56 | 1.55 | 0.87 | 0.77 | 0.81 | 2.42 | 1.97 | 1.87 | 0.6  | 2.09 | 1.25 | 1.15 |
| C-C-B-B-E | R-Cl | acac | Br | Et <sub>2</sub> NH | NMP/H <sub>2</sub> O | Et <sub>2</sub> NH·HCl | 0.46 | 1.26 | 0.57 | 0.47 | 0.79 | 2.12 | 1.67 | 1.58 | 0.53 | 1.8  | 0.96 | 0.86 |

Target product P (1-nitro-4-phenylethynyl-benzene) and starting material SM1 (phenylacetylene) are not shown. R-I, 1-iodo-4-nitrobenzene; R-Br, 1-bromo-4-nitrobenzene; R-Cl, 1-chloro-4-nitrobenzene; DMF, dimethylformamide; NMP, *N*-methylpyrrolidone; BF, bio-Factor; CP<sub>i</sub>, initial cytotoxicity potential; CP<sub>f</sub>, final cytotoxicity potential; CP<sub>f,rel</sub>, relative final cytotoxicity potential. The reactions with the five lowest CPs are highlighted with green. Organic solvents mixed with water at a 1:1 mass ratio are indicated as solvent/H<sub>2</sub>O.

**Table S5.** bio-Factors and cytotoxicity potentials for synthesis of 1-nitro-3-((4-nitrophenyl)ethynyl)benzene.

| Reaction  | Starting materials (SM2) | Catalyst (CT1) PdA <sub>2</sub> | Catalyst (CT2) CuX | Reagent (R)        | Solvent (S)          | Byproduct (BP)        | CaCo-2 |                 |                 |                     | FRSN |                 |                 |                     | HEK293T |                 |                 |                     |
|-----------|--------------------------|---------------------------------|--------------------|--------------------|----------------------|-----------------------|--------|-----------------|-----------------|---------------------|------|-----------------|-----------------|---------------------|---------|-----------------|-----------------|---------------------|
|           |                          |                                 |                    |                    |                      |                       | BF     | CP <sub>i</sub> | CP <sub>f</sub> | CP <sub>f_rel</sub> | BF   | CP <sub>i</sub> | CP <sub>f</sub> | CP <sub>f_rel</sub> | BF      | CP <sub>i</sub> | CP <sub>f</sub> | CP <sub>f_rel</sub> |
| A-A-A-A-A | PhI                      | OAc                             | I                  | Et <sub>3</sub> N  | DMF                  | Et <sub>3</sub> N·HI  | 0.74   | 1.25            | 0.92            | 0.82                | 2.61 | 1.02            | 2.67            | 0.8                 | 0.83    | 1.04            | 0.87            | 0.78                |
| A-A-A-A-B | PhI                      | OAc                             | I                  | Et <sub>3</sub> N  | NMP                  | Et <sub>3</sub> N·HI  | 0.5    | 0.66            | 0.33            | 0.23                | 4.83 | 0.43            | 2.08            | 0.21                | 0.61    | 0.45            | 0.27            | 0.19                |
| A-A-A-A-C | PhI                      | OAc                             | I                  | Et <sub>3</sub> N  | H <sub>2</sub> O     | Et <sub>3</sub> N·HI  | 0.37   | 0.53            | 0.2             | 0.1                 | 6.56 | 0.3             | 1.94            | 0.07                | 0.45    | 0.31            | 0.14            | 0.05                |
| A-A-A-A-D | PhI                      | OAc                             | I                  | Et <sub>3</sub> N  | DMF/H <sub>2</sub> O | Et <sub>3</sub> N·HI  | 0.63   | 0.89            | 0.56            | 0.46                | 3.5  | 0.66            | 2.31            | 0.44                | 0.74    | 0.68            | 0.5             | 0.42                |
| A-A-A-A-E | PhI                      | OAc                             | I                  | Et <sub>3</sub> N  | NMP/H <sub>2</sub> O | Et <sub>3</sub> N·HI  | 0.44   | 0.59            | 0.26            | 0.16                | 5.54 | 0.36            | 2.01            | 0.14                | 0.54    | 0.38            | 0.21            | 0.12                |
| A-A-A-B-A | PhI                      | OAc                             | I                  | Et <sub>2</sub> NH | DMF                  | Et <sub>2</sub> NH·HI | 0.5    | 1.95            | 0.97            | 0.87                | 1.86 | 1.43            | 2.67            | 0.8                 | 0.45    | 1.91            | 0.86            | 0.77                |
| A-A-A-B-B | PhI                      | OAc                             | I                  | Et <sub>2</sub> NH | NMP                  | Et <sub>2</sub> NH·HI | 0.28   | 1.35            | 0.37            | 0.28                | 2.47 | 0.84            | 2.07            | 0.21                | 0.2     | 1.31            | 0.27            | 0.18                |
| A-A-A-B-C | PhI                      | OAc                             | I                  | Et <sub>2</sub> NH | H <sub>2</sub> O     | Et <sub>2</sub> NH·HI | 0.2    | 1.22            | 0.24            | 0.14                | 2.75 | 0.71            | 1.94            | 0.07                | 0.11    | 1.18            | 0.13            | 0.05                |
| A-A-A-B-D | PhI                      | OAc                             | I                  | Et <sub>2</sub> NH | DMF/H <sub>2</sub> O | Et <sub>2</sub> NH·HI | 0.38   | 1.58            | 0.6             | 0.51                | 2.16 | 1.07            | 2.3             | 0.44                | 0.32    | 1.54            | 0.5             | 0.41                |
| A-A-A-B-E | PhI                      | OAc                             | I                  | Et <sub>2</sub> NH | NMP/H <sub>2</sub> O | Et <sub>2</sub> NH·HI | 0.24   | 1.28            | 0.31            | 0.21                | 2.6  | 0.77            | 2.01            | 0.14                | 0.16    | 1.24            | 0.2             | 0.11                |
| A-A-B-A-A | PhI                      | OAc                             | Br                 | Et <sub>3</sub> N  | DMF                  | Et <sub>3</sub> N·HI  | 0.74   | 1.28            | 0.95            | 0.85                | 2.57 | 1.05            | 2.7             | 0.83                | 0.84    | 1.08            | 0.9             | 0.82                |
| A-A-B-A-B | PhI                      | OAc                             | Br                 | Et <sub>3</sub> N  | NMP                  | Et <sub>3</sub> N·HI  | 0.52   | 0.69            | 0.36            | 0.26                | 4.59 | 0.46            | 2.11            | 0.24                | 0.64    | 0.48            | 0.31            | 0.22                |
| A-A-B-A-C | PhI                      | OAc                             | Br                 | Et <sub>3</sub> N  | H <sub>2</sub> O     | Et <sub>3</sub> N·HI  | 0.41   | 0.56            | 0.23            | 0.13                | 6.08 | 0.32            | 1.97            | 0.1                 | 0.5     | 0.35            | 0.18            | 0.09                |
| A-A-B-A-D | PhI                      | OAc                             | Br                 | Et <sub>3</sub> N  | DMF/H <sub>2</sub> O | Et <sub>3</sub> N·HI  | 0.64   | 0.92            | 0.59            | 0.49                | 3.39 | 0.69            | 2.34            | 0.47                | 0.76    | 0.71            | 0.54            | 0.45                |
| A-A-B-A-E | PhI                      | OAc                             | Br                 | Et <sub>3</sub> N  | NMP/H <sub>2</sub> O | Et <sub>3</sub> N·HI  | 0.47   | 0.62            | 0.29            | 0.19                | 5.21 | 0.39            | 2.04            | 0.17                | 0.58    | 0.42            | 0.24            | 0.16                |
| A-A-B-B-A | PhI                      | OAc                             | Br                 | Et <sub>2</sub> NH | DMF                  | Et <sub>2</sub> NH·HI | 0.51   | 1.98            | 1               | 0.9                 | 1.85 | 1.46            | 2.7             | 0.83                | 0.46    | 1.94            | 0.9             | 0.81                |
| A-A-B-B-B | PhI                      | OAc                             | Br                 | Et <sub>2</sub> NH | NMP                  | Et <sub>2</sub> NH·HI | 0.29   | 1.38            | 0.4             | 0.31                | 2.42 | 0.87            | 2.1             | 0.23                | 0.23    | 1.35            | 0.3             | 0.22                |
| A-A-B-B-C | PhI                      | OAc                             | Br                 | Et <sub>2</sub> NH | H <sub>2</sub> O     | Et <sub>2</sub> NH·HI | 0.22   | 1.25            | 0.27            | 0.17                | 2.68 | 0.73            | 1.97            | 0.1                 | 0.14    | 1.21            | 0.17            | 0.08                |
| A-A-B-B-D | PhI                      | OAc                             | Br                 | Et <sub>2</sub> NH | DMF/H <sub>2</sub> O | Et <sub>2</sub> NH·HI | 0.39   | 1.61            | 0.63            | 0.54                | 2.13 | 1.1             | 2.33            | 0.46                | 0.34    | 1.58            | 0.53            | 0.45                |
| A-A-B-B-E | PhI                      | OAc                             | Br                 | Et <sub>2</sub> NH | NMP/H <sub>2</sub> O | Et <sub>2</sub> NH·HI | 0.26   | 1.31            | 0.34            | 0.24                | 2.54 | 0.8             | 2.04            | 0.17                | 0.19    | 1.28            | 0.24            | 0.15                |
| A-B-A-A-A | PhI                      | Cl                              | I                  | Et <sub>3</sub> N  | DMF                  | Et <sub>3</sub> N·HI  | 0.74   | 1.26            | 0.93            | 0.83                | 2.59 | 1.04            | 2.68            | 0.81                | 0.83    | 1.05            | 0.87            | 0.79                |
| A-B-A-A-B | PhI                      | Cl                              | I                  | Et <sub>3</sub> N  | NMP                  | Et <sub>3</sub> N·HI  | 0.5    | 0.66            | 0.33            | 0.24                | 4.73 | 0.44            | 2.09            | 0.22                | 0.62    | 0.45            | 0.28            | 0.19                |
| A-B-A-A-C | PhI                      | Cl                              | I                  | Et <sub>3</sub> N  | H <sub>2</sub> O     | Et <sub>3</sub> N·HI  | 0.38   | 0.53            | 0.2             | 0.1                 | 6.35 | 0.31            | 1.96            | 0.09                | 0.46    | 0.32            | 0.15            | 0.06                |
| A-B-A-A-D | PhI                      | Cl                              | I                  | Et <sub>3</sub> N  | DMF/H <sub>2</sub> O | Et <sub>3</sub> N·HI  | 0.63   | 0.89            | 0.56            | 0.47                | 3.45 | 0.67            | 2.32            | 0.45                | 0.75    | 0.68            | 0.51            | 0.42                |
| A-B-A-A-E | PhI                      | Cl                              | I                  | Et <sub>3</sub> N  | NMP/H <sub>2</sub> O | Et <sub>3</sub> N·HI  | 0.45   | 0.6             | 0.27            | 0.17                | 5.39 | 0.38            | 2.02            | 0.15                | 0.55    | 0.39            | 0.21            | 0.12                |
| A-B-A-B-A | PhI                      | Cl                              | I                  | Et <sub>2</sub> NH | DMF                  | Et <sub>2</sub> NH·HI | 0.5    | 1.95            | 0.97            | 0.87                | 1.86 | 1.45            | 2.68            | 0.81                | 0.45    | 1.91            | 0.87            | 0.78                |
| A-B-A-B-B | PhI                      | Cl                              | I                  | Et <sub>2</sub> NH | NMP                  | Et <sub>2</sub> NH·HI | 0.28   | 1.36            | 0.38            | 0.28                | 2.45 | 0.85            | 2.09            | 0.22                | 0.21    | 1.32            | 0.27            | 0.19                |
| A-B-A-B-C | PhI                      | Cl                              | I                  | Et <sub>2</sub> NH | H <sub>2</sub> O     | Et <sub>2</sub> NH·HI | 0.2    | 1.22            | 0.25            | 0.15                | 2.72 | 0.72            | 1.95            | 0.08                | 0.12    | 1.18            | 0.14            | 0.05                |
| A-B-A-B-D | PhI                      | Cl                              | I                  | Et <sub>2</sub> NH | DMF/H <sub>2</sub> O | Et <sub>2</sub> NH·HI | 0.38   | 1.59            | 0.61            | 0.51                | 2.14 | 1.08            | 2.32            | 0.45                | 0.33    | 1.55            | 0.5             | 0.42                |
| A-B-A-B-E | PhI                      | Cl                              | I                  | Et <sub>2</sub> NH | NMP/H <sub>2</sub> O | Et <sub>2</sub> NH·HI | 0.24   | 1.29            | 0.31            | 0.21                | 2.58 | 0.78            | 2.02            | 0.15                | 0.17    | 1.25            | 0.21            | 0.12                |
| A-B-B-A-A | PhI                      | Cl                              | Br                 | Et <sub>3</sub> N  | DMF                  | Et <sub>3</sub> N·HI  | 0.74   | 1.29            | 0.96            | 0.86                | 2.55 | 1.06            | 2.71            | 0.84                | 0.84    | 1.08            | 0.91            | 0.82                |
| A-B-B-A-B | PhI                      | Cl                              | Br                 | Et <sub>3</sub> N  | NMP                  | Et <sub>3</sub> N·HI  | 0.52   | 0.69            | 0.36            | 0.27                | 4.5  | 0.47            | 2.12            | 0.25                | 0.64    | 0.49            | 0.31            | 0.23                |
| A-B-B-A-C | PhI                      | Cl                              | Br                 | Et <sub>3</sub> N  | H <sub>2</sub> O     | Et <sub>3</sub> N·HI  | 0.41   | 0.56            | 0.23            | 0.13                | 5.9  | 0.34            | 1.98            | 0.11                | 0.51    | 0.35            | 0.18            | 0.09                |
| A-B-B-A-D | PhI                      | Cl                              | Br                 | Et <sub>3</sub> N  | DMF/H <sub>2</sub> O | Et <sub>3</sub> N·HI  | 0.64   | 0.92            | 0.59            | 0.5                 | 3.35 | 0.7             | 2.35            | 0.48                | 0.76    | 0.72            | 0.54            | 0.46                |
| A-B-B-A-E | PhI                      | Cl                              | Br                 | Et <sub>3</sub> N  | NMP/H <sub>2</sub> O | Et <sub>3</sub> N·HI  | 0.47   | 0.63            | 0.3             | 0.2                 | 5.08 | 0.4             | 2.05            | 0.18                | 0.59    | 0.42            | 0.25            | 0.16                |
| A-B-B-B-A | PhI                      | Cl                              | Br                 | Et <sub>2</sub> NH | DMF                  | Et <sub>2</sub> NH·HI | 0.51   | 1.98            | 1               | 0.9                 | 1.84 | 1.47            | 2.71            | 0.84                | 0.46    | 1.95            | 0.9             | 0.81                |
| A-B-B-B-B | PhI                      | Cl                              | Br                 | Et <sub>2</sub> NH | NMP                  | Et <sub>2</sub> NH·HI | 0.3    | 1.39            | 0.41            | 0.31                | 2.41 | 0.88            | 2.12            | 0.25                | 0.23    | 1.35            | 0.31            | 0.22                |
| A-B-B-B-C | PhI                      | Cl                              | Br                 | Et <sub>2</sub> NH | H <sub>2</sub> O     | Et <sub>2</sub> NH·HI | 0.22   | 1.25            | 0.28            | 0.18                | 2.66 | 0.75            | 1.98            | 0.11                | 0.14    | 1.22            | 0.17            | 0.09                |
| A-B-B-B-D | PhI                      | Cl                              | Br                 | Et <sub>2</sub> NH | DMF/H <sub>2</sub> O | Et <sub>2</sub> NH·HI | 0.4    | 1.62            | 0.64            | 0.54                | 2.11 | 1.11            | 2.35            | 0.48                | 0.34    | 1.58            | 0.54            | 0.45                |
| A-B-B-B-E | PhI                      | Cl                              | Br                 | Et <sub>2</sub> NH | NMP/H <sub>2</sub> O | Et <sub>2</sub> NH·HI | 0.26   | 1.32            | 0.34            | 0.24                | 2.52 | 0.81            | 2.05            | 0.18                | 0.19    | 1.28            | 0.24            | 0.15                |
| A-C-A-A-A | PhI                      | acac                            | I                  | Et <sub>3</sub> N  | DMF                  | Et <sub>3</sub> N·HI  | 0.78   | 1.51            | 1.18            | 1.09                | 1.68 | 2.44            | 4.09            | 2.22                | 0.9     | 1.75            | 1.57            | 1.49                |

|           |      |      |    |                    |                      |                        |      |      |      |      |      |      |      |      |      |      |      |      |
|-----------|------|------|----|--------------------|----------------------|------------------------|------|------|------|------|------|------|------|------|------|------|------|------|
| A-C-A-A-B | PhI  | acac | I  | Et <sub>3</sub> N  | NMP                  | Et <sub>3</sub> N·HI   | 0.64 | 0.92 | 0.59 | 0.49 | 1.89 | 1.84 | 3.49 | 1.62 | 0.85 | 1.15 | 0.98 | 0.89 |
| A-C-A-A-C | PhI  | acac | I  | Et <sub>3</sub> N  | H <sub>2</sub> O     | Et <sub>3</sub> N·HI   | 0.58 | 0.79 | 0.46 | 0.36 | 1.96 | 1.71 | 3.36 | 1.49 | 0.83 | 1.02 | 0.85 | 0.76 |
| A-C-A-A-D | PhI  | acac | I  | Et <sub>3</sub> N  | DMF/H <sub>2</sub> O | Et <sub>3</sub> N·HI   | 0.71 | 1.15 | 0.82 | 0.72 | 1.79 | 2.07 | 3.72 | 1.85 | 0.87 | 1.38 | 1.21 | 1.12 |
| A-C-A-A-E | PhI  | acac | I  | Et <sub>3</sub> N  | NMP/H <sub>2</sub> O | Et <sub>3</sub> N·HI   | 0.61 | 0.85 | 0.52 | 0.42 | 1.93 | 1.78 | 3.43 | 1.56 | 0.84 | 1.09 | 0.91 | 0.83 |
| A-C-A-B-A | PhI  | acac | I  | Et <sub>2</sub> NH | DMF                  | Et <sub>2</sub> NH·HI  | 0.56 | 2.21 | 1.23 | 1.13 | 1.43 | 2.85 | 4.08 | 2.21 | 0.6  | 2.61 | 1.57 | 1.48 |
| A-C-A-B-B | PhI  | acac | I  | Et <sub>2</sub> NH | NMP                  | Et <sub>2</sub> NH·HI  | 0.39 | 1.61 | 0.64 | 0.54 | 1.55 | 2.25 | 3.49 | 1.62 | 0.48 | 2.02 | 0.97 | 0.89 |
| A-C-A-B-C | PhI  | acac | I  | Et <sub>2</sub> NH | H <sub>2</sub> O     | Et <sub>2</sub> NH·HI  | 0.34 | 1.48 | 0.5  | 0.4  | 1.58 | 2.12 | 3.36 | 1.49 | 0.45 | 1.88 | 0.84 | 0.75 |
| A-C-A-B-D | PhI  | acac | I  | Et <sub>2</sub> NH | DMF/H <sub>2</sub> O | Et <sub>2</sub> NH·HI  | 0.47 | 1.84 | 0.87 | 0.77 | 1.5  | 2.48 | 3.72 | 1.85 | 0.54 | 2.25 | 1.2  | 1.12 |
| A-C-A-B-E | PhI  | acac | I  | Et <sub>2</sub> NH | NMP/H <sub>2</sub> O | Et <sub>2</sub> NH·HI  | 0.37 | 1.54 | 0.57 | 0.47 | 1.57 | 2.19 | 3.42 | 1.55 | 0.47 | 1.95 | 0.91 | 0.82 |
| A-C-B-A-A | PhI  | acac | Br | Et <sub>3</sub> N  | DMF                  | Et <sub>3</sub> N·HI   | 0.79 | 1.54 | 1.21 | 1.12 | 1.67 | 2.47 | 4.11 | 2.25 | 0.9  | 1.78 | 1.61 | 1.52 |
| A-C-B-A-B | PhI  | acac | Br | Et <sub>3</sub> N  | NMP                  | Et <sub>3</sub> N·HI   | 0.65 | 0.95 | 0.62 | 0.52 | 1.88 | 1.87 | 3.52 | 1.65 | 0.85 | 1.19 | 1.02 | 0.93 |
| A-C-B-A-C | PhI  | acac | Br | Et <sub>3</sub> N  | H <sub>2</sub> O     | Et <sub>3</sub> N·HI   | 0.6  | 0.82 | 0.49 | 0.39 | 1.95 | 1.74 | 3.39 | 1.52 | 0.84 | 1.06 | 0.88 | 0.79 |
| A-C-B-A-D | PhI  | acac | Br | Et <sub>3</sub> N  | DMF/H <sub>2</sub> O | Et <sub>3</sub> N·HI   | 0.72 | 1.18 | 0.85 | 0.75 | 1.78 | 2.1  | 3.75 | 1.88 | 0.88 | 1.42 | 1.25 | 1.16 |
| A-C-B-A-E | PhI  | acac | Br | Et <sub>3</sub> N  | NMP/H <sub>2</sub> O | Et <sub>3</sub> N·HI   | 0.63 | 0.88 | 0.55 | 0.45 | 1.91 | 1.81 | 3.45 | 1.58 | 0.85 | 1.12 | 0.95 | 0.86 |
| A-C-B-B-A | PhI  | acac | Br | Et <sub>2</sub> NH | DMF                  | Et <sub>2</sub> NH·HI  | 0.56 | 2.24 | 1.26 | 1.16 | 1.43 | 2.88 | 4.11 | 2.24 | 0.61 | 2.65 | 1.6  | 1.51 |
| A-C-B-B-B | PhI  | acac | Br | Et <sub>2</sub> NH | NMP                  | Et <sub>2</sub> NH·HI  | 0.41 | 1.64 | 0.66 | 0.57 | 1.54 | 2.28 | 3.52 | 1.65 | 0.49 | 2.05 | 1.01 | 0.92 |
| A-C-B-B-C | PhI  | acac | Br | Et <sub>2</sub> NH | H <sub>2</sub> O     | Et <sub>2</sub> NH·HI  | 0.35 | 1.51 | 0.53 | 0.43 | 1.58 | 2.15 | 3.38 | 1.51 | 0.46 | 1.92 | 0.88 | 0.79 |
| A-C-B-B-D | PhI  | acac | Br | Et <sub>2</sub> NH | DMF/H <sub>2</sub> O | Et <sub>2</sub> NH·HI  | 0.48 | 1.87 | 0.9  | 0.8  | 1.49 | 2.51 | 3.75 | 1.88 | 0.54 | 2.28 | 1.24 | 1.15 |
| A-C-B-B-E | PhI  | acac | Br | Et <sub>2</sub> NH | NMP/H <sub>2</sub> O | Et <sub>2</sub> NH·HI  | 0.38 | 1.57 | 0.6  | 0.5  | 1.56 | 2.21 | 3.45 | 1.58 | 0.47 | 1.98 | 0.94 | 0.85 |
| B-A-A-A-A | PhBr | OAc  | I  | Et <sub>3</sub> N  | DMF                  | Et <sub>3</sub> N·HBr  | 0.53 | 1.7  | 0.9  | 0.81 | 2.49 | 1.07 | 2.67 | 0.8  | 0.68 | 1.26 | 0.87 | 0.78 |
| B-A-A-A-B | PhBr | OAc  | I  | Et <sub>3</sub> N  | NMP                  | Et <sub>3</sub> N·HBr  | 0.28 | 1.11 | 0.31 | 0.21 | 4.33 | 0.48 | 2.08 | 0.21 | 0.4  | 0.67 | 0.27 | 0.18 |
| B-A-A-A-C | PhBr | OAc  | I  | Et <sub>3</sub> N  | H <sub>2</sub> O     | Et <sub>3</sub> N·HBr  | 0.18 | 0.98 | 0.18 | 0.08 | 5.62 | 0.35 | 1.94 | 0.08 | 0.26 | 0.54 | 0.14 | 0.05 |
| B-A-A-A-D | PhBr | OAc  | I  | Et <sub>3</sub> N  | DMF/H <sub>2</sub> O | Et <sub>3</sub> N·HBr  | 0.4  | 1.34 | 0.54 | 0.44 | 3.25 | 0.71 | 2.31 | 0.44 | 0.56 | 0.9  | 0.5  | 0.41 |
| B-A-A-A-E | PhBr | OAc  | I  | Et <sub>3</sub> N  | NMP/H <sub>2</sub> O | Et <sub>3</sub> N·HBr  | 0.23 | 1.04 | 0.24 | 0.14 | 4.87 | 0.41 | 2.01 | 0.14 | 0.34 | 0.6  | 0.2  | 0.12 |
| B-A-A-B-A | PhBr | OAc  | I  | Et <sub>2</sub> NH | DMF                  | Et <sub>2</sub> NH·HBr | 0.37 | 2.4  | 0.89 | 0.79 | 1.81 | 1.48 | 2.68 | 0.81 | 0.41 | 2.13 | 0.88 | 0.79 |
| B-A-A-B-B | PhBr | OAc  | I  | Et <sub>2</sub> NH | NMP                  | Et <sub>2</sub> NH·HBr | 0.17 | 1.8  | 0.3  | 0.2  | 2.34 | 0.89 | 2.08 | 0.21 | 0.19 | 1.53 | 0.28 | 0.2  |
| B-A-A-B-C | PhBr | OAc  | I  | Et <sub>2</sub> NH | H <sub>2</sub> O     | Et <sub>2</sub> NH·HBr | 0.1  | 1.67 | 0.17 | 0.07 | 2.58 | 0.76 | 1.95 | 0.08 | 0.11 | 1.4  | 0.15 | 0.06 |
| B-A-A-B-D | PhBr | OAc  | I  | Et <sub>2</sub> NH | DMF/H <sub>2</sub> O | Et <sub>2</sub> NH·HBr | 0.26 | 2.03 | 0.53 | 0.43 | 2.07 | 1.12 | 2.31 | 0.44 | 0.29 | 1.76 | 0.52 | 0.43 |
| B-A-A-B-E | PhBr | OAc  | I  | Et <sub>2</sub> NH | NMP/H <sub>2</sub> O | Et <sub>2</sub> NH·HBr | 0.13 | 1.73 | 0.23 | 0.13 | 2.45 | 0.82 | 2.02 | 0.15 | 0.15 | 1.47 | 0.22 | 0.13 |
| B-A-B-A-A | PhBr | OAc  | Br | Et <sub>3</sub> N  | DMF                  | Et <sub>3</sub> N·HBr  | 0.54 | 1.73 | 0.93 | 0.84 | 2.45 | 1.1  | 2.7  | 0.83 | 0.69 | 1.3  | 0.9  | 0.81 |
| B-A-B-A-B | PhBr | OAc  | Br | Et <sub>3</sub> N  | NMP                  | Et <sub>3</sub> N·HBr  | 0.3  | 1.14 | 0.34 | 0.24 | 4.14 | 0.51 | 2.11 | 0.24 | 0.43 | 0.71 | 0.31 | 0.22 |
| B-A-B-A-C | PhBr | OAc  | Br | Et <sub>3</sub> N  | H <sub>2</sub> O     | Et <sub>3</sub> N·HBr  | 0.2  | 1.01 | 0.21 | 0.11 | 5.27 | 0.37 | 1.97 | 0.1  | 0.3  | 0.57 | 0.17 | 0.08 |
| B-A-B-A-D | PhBr | OAc  | Br | Et <sub>3</sub> N  | DMF/H <sub>2</sub> O | Et <sub>3</sub> N·HBr  | 0.42 | 1.37 | 0.57 | 0.47 | 3.16 | 0.74 | 2.34 | 0.47 | 0.57 | 0.94 | 0.54 | 0.45 |
| B-A-B-A-E | PhBr | OAc  | Br | Et <sub>3</sub> N  | NMP/H <sub>2</sub> O | Et <sub>3</sub> N·HBr  | 0.25 | 1.07 | 0.27 | 0.17 | 4.62 | 0.44 | 2.04 | 0.17 | 0.38 | 0.64 | 0.24 | 0.15 |
| B-A-B-B-A | PhBr | OAc  | Br | Et <sub>2</sub> NH | DMF                  | Et <sub>2</sub> NH·HBr | 0.38 | 2.43 | 0.92 | 0.82 | 1.79 | 1.51 | 2.71 | 0.84 | 0.42 | 2.16 | 0.91 | 0.83 |
| B-A-B-B-B | PhBr | OAc  | Br | Et <sub>2</sub> NH | NMP                  | Et <sub>2</sub> NH·HBr | 0.18 | 1.83 | 0.33 | 0.23 | 2.3  | 0.92 | 2.11 | 0.24 | 0.2  | 1.57 | 0.32 | 0.23 |
| B-A-B-B-C | PhBr | OAc  | Br | Et <sub>2</sub> NH | H <sub>2</sub> O     | Et <sub>2</sub> NH·HBr | 0.12 | 1.7  | 0.2  | 0.1  | 2.52 | 0.78 | 1.98 | 0.11 | 0.13 | 1.43 | 0.19 | 0.1  |
| B-A-B-B-D | PhBr | OAc  | Br | Et <sub>2</sub> NH | DMF/H <sub>2</sub> O | Et <sub>2</sub> NH·HBr | 0.27 | 2.06 | 0.56 | 0.46 | 2.04 | 1.15 | 2.34 | 0.47 | 0.31 | 1.8  | 0.55 | 0.46 |
| B-A-B-B-E | PhBr | OAc  | Br | Et <sub>2</sub> NH | NMP/H <sub>2</sub> O | Et <sub>2</sub> NH·HBr | 0.15 | 1.76 | 0.26 | 0.16 | 2.4  | 0.85 | 2.05 | 0.18 | 0.17 | 1.5  | 0.25 | 0.17 |
| B-B-A-A-A | PhBr | Cl   | I  | Et <sub>3</sub> N  | DMF                  | Et <sub>3</sub> N·HBr  | 0.53 | 1.71 | 0.91 | 0.81 | 2.47 | 1.09 | 2.68 | 0.82 | 0.69 | 1.27 | 0.87 | 0.78 |
| B-B-A-A-B | PhBr | Cl   | I  | Et <sub>3</sub> N  | NMP                  | Et <sub>3</sub> N·HBr  | 0.28 | 1.11 | 0.31 | 0.22 | 4.25 | 0.49 | 2.09 | 0.22 | 0.41 | 0.67 | 0.28 | 0.19 |
| B-B-A-A-C | PhBr | Cl   | I  | Et <sub>3</sub> N  | H <sub>2</sub> O     | Et <sub>3</sub> N·HBr  | 0.18 | 0.98 | 0.18 | 0.08 | 5.46 | 0.36 | 1.96 | 0.09 | 0.26 | 0.54 | 0.14 | 0.05 |
| B-B-A-A-D | PhBr | Cl   | I  | Et <sub>3</sub> N  | DMF/H <sub>2</sub> O | Et <sub>3</sub> N·HBr  | 0.41 | 1.34 | 0.54 | 0.45 | 3.21 | 0.72 | 2.32 | 0.45 | 0.56 | 0.9  | 0.51 | 0.42 |
| B-B-A-A-E | PhBr | Cl   | I  | Et <sub>3</sub> N  | NMP/H <sub>2</sub> O | Et <sub>3</sub> N·HBr  | 0.24 | 1.05 | 0.25 | 0.15 | 4.76 | 0.43 | 2.02 | 0.15 | 0.34 | 0.61 | 0.21 | 0.12 |
| B-B-A-B-A | PhBr | Cl   | I  | Et <sub>2</sub> NH | DMF                  | Et <sub>2</sub> NH·HBr | 0.37 | 2.4  | 0.9  | 0.8  | 1.8  | 1.5  | 2.69 | 0.82 | 0.41 | 2.13 | 0.88 | 0.8  |

|           |      |      |    |                    |                      |                        |      |      |      |      |      |      |      |      |      |      |      |      |
|-----------|------|------|----|--------------------|----------------------|------------------------|------|------|------|------|------|------|------|------|------|------|------|------|
| B-B-A-B-B | PhBr | Cl   | I  | Et <sub>2</sub> NH | NMP                  | Et <sub>2</sub> NH·HBr | 0.17 | 1.81 | 0.3  | 0.2  | 2.33 | 0.9  | 2.1  | 0.23 | 0.19 | 1.54 | 0.29 | 0.2  |
| B-B-A-B-C | PhBr | Cl   | I  | Et <sub>2</sub> NH | H <sub>2</sub> O     | Et <sub>2</sub> NH·HBr | 0.1  | 1.67 | 0.17 | 0.07 | 2.56 | 0.77 | 1.96 | 0.09 | 0.11 | 1.4  | 0.16 | 0.07 |
| B-B-A-B-D | PhBr | Cl   | I  | Et <sub>2</sub> NH | DMF/H <sub>2</sub> O | Et <sub>2</sub> NH·HBr | 0.26 | 2.04 | 0.53 | 0.44 | 2.06 | 1.13 | 2.33 | 0.46 | 0.29 | 1.77 | 0.52 | 0.43 |
| B-B-A-B-E | PhBr | Cl   | I  | Et <sub>2</sub> NH | NMP/H <sub>2</sub> O | Et <sub>2</sub> NH·HBr | 0.14 | 1.74 | 0.24 | 0.14 | 2.43 | 0.83 | 2.03 | 0.16 | 0.15 | 1.47 | 0.22 | 0.13 |
| B-B-B-A-A | PhBr | Cl   | Br | Et <sub>3</sub> N  | DMF                  | Et <sub>3</sub> N·HBr  | 0.54 | 1.74 | 0.94 | 0.84 | 2.43 | 1.11 | 2.71 | 0.84 | 0.69 | 1.3  | 0.91 | 0.82 |
| B-B-B-A-B | PhBr | Cl   | Br | Et <sub>3</sub> N  | NMP                  | Et <sub>3</sub> N·HBr  | 0.3  | 1.14 | 0.34 | 0.25 | 4.07 | 0.52 | 2.12 | 0.25 | 0.44 | 0.71 | 0.31 | 0.22 |
| B-B-B-A-C | PhBr | Cl   | Br | Et <sub>3</sub> N  | H <sub>2</sub> O     | Et <sub>3</sub> N·HBr  | 0.21 | 1.01 | 0.21 | 0.11 | 5.14 | 0.39 | 1.98 | 0.12 | 0.31 | 0.58 | 0.18 | 0.09 |
| B-B-B-A-D | PhBr | Cl   | Br | Et <sub>3</sub> N  | DMF/H <sub>2</sub> O | Et <sub>3</sub> N·HBr  | 0.42 | 1.37 | 0.57 | 0.48 | 3.13 | 0.75 | 2.35 | 0.48 | 0.58 | 0.94 | 0.54 | 0.45 |
| B-B-B-A-E | PhBr | Cl   | Br | Et <sub>3</sub> N  | NMP/H <sub>2</sub> O | Et <sub>3</sub> N·HBr  | 0.26 | 1.08 | 0.28 | 0.18 | 4.53 | 0.45 | 2.05 | 0.18 | 0.38 | 0.64 | 0.24 | 0.16 |
| B-B-B-B-A | PhBr | Cl   | Br | Et <sub>2</sub> NH | DMF                  | Et <sub>2</sub> NH·HBr | 0.38 | 2.43 | 0.93 | 0.83 | 1.78 | 1.52 | 2.72 | 0.85 | 0.42 | 2.17 | 0.92 | 0.83 |
| B-B-B-B-B | PhBr | Cl   | Br | Et <sub>2</sub> NH | NMP                  | Et <sub>2</sub> NH·HBr | 0.18 | 1.84 | 0.33 | 0.23 | 2.29 | 0.93 | 2.12 | 0.25 | 0.21 | 1.57 | 0.32 | 0.24 |
| B-B-B-B-C | PhBr | Cl   | Br | Et <sub>2</sub> NH | H <sub>2</sub> O     | Et <sub>2</sub> NH·HBr | 0.12 | 1.7  | 0.2  | 0.1  | 2.5  | 0.8  | 1.99 | 0.12 | 0.13 | 1.44 | 0.19 | 0.1  |
| B-B-B-B-D | PhBr | Cl   | Br | Et <sub>2</sub> NH | DMF/H <sub>2</sub> O | Et <sub>2</sub> NH·HBr | 0.27 | 2.07 | 0.56 | 0.46 | 2.03 | 1.16 | 2.35 | 0.48 | 0.31 | 1.8  | 0.55 | 0.47 |
| B-B-B-B-E | PhBr | Cl   | Br | Et <sub>2</sub> NH | NMP/H <sub>2</sub> O | Et <sub>2</sub> NH·HBr | 0.15 | 1.77 | 0.27 | 0.17 | 2.39 | 0.86 | 2.06 | 0.19 | 0.17 | 1.51 | 0.26 | 0.17 |
| B-C-A-A-A | PhBr | acac | I  | Et <sub>3</sub> N  | DMF                  | Et <sub>3</sub> N·HBr  | 0.59 | 1.96 | 1.16 | 1.07 | 1.64 | 2.49 | 4.09 | 2.22 | 0.8  | 1.97 | 1.57 | 1.48 |
| B-C-A-A-B | PhBr | acac | I  | Et <sub>3</sub> N  | NMP                  | Et <sub>3</sub> N·HBr  | 0.42 | 1.37 | 0.57 | 0.47 | 1.84 | 1.89 | 3.49 | 1.62 | 0.71 | 1.38 | 0.98 | 0.89 |
| B-C-A-A-C | PhBr | acac | I  | Et <sub>3</sub> N  | H <sub>2</sub> O     | Et <sub>3</sub> N·HBr  | 0.35 | 1.24 | 0.44 | 0.34 | 1.91 | 1.76 | 3.36 | 1.49 | 0.68 | 1.24 | 0.84 | 0.75 |
| B-C-A-A-D | PhBr | acac | I  | Et <sub>3</sub> N  | DMF/H <sub>2</sub> O | Et <sub>3</sub> N·HBr  | 0.5  | 1.6  | 0.8  | 0.7  | 1.75 | 2.12 | 3.72 | 1.85 | 0.75 | 1.61 | 1.21 | 1.12 |
| B-C-A-A-E | PhBr | acac | I  | Et <sub>3</sub> N  | NMP/H <sub>2</sub> O | Et <sub>3</sub> N·HBr  | 0.39 | 1.3  | 0.5  | 0.4  | 1.87 | 1.83 | 3.43 | 1.56 | 0.7  | 1.31 | 0.91 | 0.82 |
| B-C-A-B-A | PhBr | acac | I  | Et <sub>2</sub> NH | DMF                  | Et <sub>2</sub> NH·HBr | 0.43 | 2.66 | 1.15 | 1.05 | 1.41 | 2.9  | 4.09 | 2.22 | 0.56 | 2.83 | 1.58 | 1.5  |
| B-C-A-B-B | PhBr | acac | I  | Et <sub>2</sub> NH | NMP                  | Et <sub>2</sub> NH·HBr | 0.27 | 2.06 | 0.56 | 0.46 | 1.52 | 2.3  | 3.5  | 1.63 | 0.44 | 2.24 | 0.99 | 0.9  |
| B-C-A-B-C | PhBr | acac | I  | Et <sub>2</sub> NH | H <sub>2</sub> O     | Et <sub>2</sub> NH·HBr | 0.22 | 1.93 | 0.43 | 0.33 | 1.55 | 2.17 | 3.36 | 1.5  | 0.41 | 2.1  | 0.86 | 0.77 |
| B-C-A-B-D | PhBr | acac | I  | Et <sub>2</sub> NH | DMF/H <sub>2</sub> O | Et <sub>2</sub> NH·HBr | 0.34 | 2.29 | 0.79 | 0.69 | 1.47 | 2.53 | 3.73 | 1.86 | 0.49 | 2.47 | 1.22 | 1.13 |
| B-C-A-B-E | PhBr | acac | I  | Et <sub>2</sub> NH | NMP/H <sub>2</sub> O | Et <sub>2</sub> NH·HBr | 0.25 | 1.99 | 0.49 | 0.39 | 1.53 | 2.24 | 3.43 | 1.56 | 0.43 | 2.17 | 0.92 | 0.84 |
| B-C-B-A-A | PhBr | acac | Br | Et <sub>3</sub> N  | DMF                  | Et <sub>3</sub> N·HBr  | 0.6  | 1.99 | 1.19 | 1.1  | 1.64 | 2.52 | 4.12 | 2.25 | 0.8  | 2    | 1.61 | 1.52 |
| B-C-B-A-B | PhBr | acac | Br | Et <sub>3</sub> N  | NMP                  | Et <sub>3</sub> N·HBr  | 0.43 | 1.4  | 0.6  | 0.5  | 1.83 | 1.92 | 3.52 | 1.65 | 0.72 | 1.41 | 1.01 | 0.92 |
| B-C-B-A-C | PhBr | acac | Br | Et <sub>3</sub> N  | H <sub>2</sub> O     | Et <sub>3</sub> N·HBr  | 0.37 | 1.27 | 0.47 | 0.37 | 1.89 | 1.79 | 3.39 | 1.52 | 0.69 | 1.28 | 0.88 | 0.79 |
| B-C-B-A-D | PhBr | acac | Br | Et <sub>3</sub> N  | DMF/H <sub>2</sub> O | Et <sub>3</sub> N·HBr  | 0.51 | 1.63 | 0.83 | 0.73 | 1.74 | 2.15 | 3.75 | 1.88 | 0.76 | 1.64 | 1.24 | 1.15 |
| B-C-B-A-E | PhBr | acac | Br | Et <sub>3</sub> N  | NMP/H <sub>2</sub> O | Et <sub>3</sub> N·HBr  | 0.4  | 1.33 | 0.53 | 0.43 | 1.86 | 1.86 | 3.45 | 1.59 | 0.7  | 1.34 | 0.94 | 0.86 |
| B-C-B-B-A | PhBr | acac | Br | Et <sub>2</sub> NH | DMF                  | Et <sub>2</sub> NH·HBr | 0.44 | 2.69 | 1.18 | 1.08 | 1.41 | 2.93 | 4.12 | 2.25 | 0.56 | 2.87 | 1.62 | 1.53 |
| B-C-B-B-B | PhBr | acac | Br | Et <sub>2</sub> NH | NMP                  | Et <sub>2</sub> NH·HBr | 0.28 | 2.09 | 0.59 | 0.49 | 1.51 | 2.33 | 3.53 | 1.66 | 0.45 | 2.27 | 1.03 | 0.94 |
| B-C-B-B-C | PhBr | acac | Br | Et <sub>2</sub> NH | H <sub>2</sub> O     | Et <sub>2</sub> NH·HBr | 0.23 | 1.96 | 0.46 | 0.36 | 1.54 | 2.2  | 3.39 | 1.52 | 0.42 | 2.14 | 0.89 | 0.8  |
| B-C-B-B-D | PhBr | acac | Br | Et <sub>2</sub> NH | DMF/H <sub>2</sub> O | Et <sub>2</sub> NH·HBr | 0.35 | 2.32 | 0.82 | 0.72 | 1.47 | 2.56 | 3.76 | 1.89 | 0.5  | 2.5  | 1.26 | 1.17 |
| B-C-B-B-E | PhBr | acac | Br | Et <sub>2</sub> NH | NMP/H <sub>2</sub> O | Et <sub>2</sub> NH·HBr | 0.26 | 2.02 | 0.52 | 0.42 | 1.53 | 2.26 | 3.46 | 1.59 | 0.43 | 2.21 | 0.96 | 0.87 |
| C-A-A-A-A | PhCl | OAc  | I  | Et <sub>3</sub> N  | DMF                  | Et <sub>3</sub> N·HCl  | 0.73 | 1.27 | 0.92 | 0.82 | 2.52 | 1.06 | 2.67 | 0.8  | 0.84 | 1.04 | 0.88 | 0.79 |
| C-A-A-A-B | PhCl | OAc  | I  | Et <sub>3</sub> N  | NMP                  | Et <sub>3</sub> N·HCl  | 0.49 | 0.67 | 0.33 | 0.23 | 4.46 | 0.46 | 2.07 | 0.2  | 0.63 | 0.45 | 0.28 | 0.19 |
| C-A-A-A-C | PhCl | OAc  | I  | Et <sub>3</sub> N  | H <sub>2</sub> O     | Et <sub>3</sub> N·HCl  | 0.36 | 0.54 | 0.19 | 0.09 | 5.86 | 0.33 | 1.94 | 0.07 | 0.47 | 0.32 | 0.15 | 0.06 |
| C-A-A-A-D | PhCl | OAc  | I  | Et <sub>3</sub> N  | DMF/H <sub>2</sub> O | Et <sub>3</sub> N·HCl  | 0.62 | 0.9  | 0.56 | 0.46 | 3.31 | 0.69 | 2.3  | 0.43 | 0.75 | 0.68 | 0.51 | 0.42 |
| C-A-A-A-E | PhCl | OAc  | I  | Et <sub>3</sub> N  | NMP/H <sub>2</sub> O | Et <sub>3</sub> N·HCl  | 0.43 | 0.61 | 0.26 | 0.16 | 5.04 | 0.4  | 2    | 0.14 | 0.56 | 0.38 | 0.22 | 0.13 |
| C-A-A-B-A | PhCl | OAc  | I  | Et <sub>2</sub> NH | DMF                  | Et <sub>2</sub> NH·HCl | 0.48 | 1.96 | 0.94 | 0.85 | 1.82 | 1.47 | 2.66 | 0.8  | 0.45 | 1.91 | 0.86 | 0.78 |
| C-A-A-B-B | PhCl | OAc  | I  | Et <sub>2</sub> NH | NMP                  | Et <sub>2</sub> NH·HCl | 0.26 | 1.36 | 0.35 | 0.25 | 2.37 | 0.87 | 2.07 | 0.2  | 0.21 | 1.31 | 0.27 | 0.18 |
| C-A-A-B-C | PhCl | OAc  | I  | Et <sub>2</sub> NH | H <sub>2</sub> O     | Et <sub>2</sub> NH·HCl | 0.18 | 1.23 | 0.22 | 0.12 | 2.62 | 0.74 | 1.94 | 0.07 | 0.12 | 1.18 | 0.14 | 0.05 |
| C-A-A-B-D | PhCl | OAc  | I  | Et <sub>2</sub> NH | DMF/H <sub>2</sub> O | Et <sub>2</sub> NH·HCl | 0.36 | 1.59 | 0.58 | 0.48 | 2.08 | 1.1  | 2.3  | 0.43 | 0.32 | 1.54 | 0.5  | 0.41 |
| C-A-A-B-E | PhCl | OAc  | I  | Et <sub>2</sub> NH | NMP/H <sub>2</sub> O | Et <sub>2</sub> NH·HCl | 0.22 | 1.3  | 0.28 | 0.18 | 2.48 | 0.81 | 2    | 0.13 | 0.16 | 1.25 | 0.2  | 0.11 |
| C-A-B-A-A | PhCl | OAc  | Br | Et <sub>3</sub> N  | DMF                  | Et <sub>3</sub> N·HCl  | 0.73 | 1.3  | 0.95 | 0.85 | 2.48 | 1.09 | 2.69 | 0.82 | 0.84 | 1.08 | 0.91 | 0.82 |

|           |      |      |    |                    |                      |                        |      |      |      |      |      |      |      |      |      |      |      |      |
|-----------|------|------|----|--------------------|----------------------|------------------------|------|------|------|------|------|------|------|------|------|------|------|------|
| C-A-B-A-B | PhCl | OAc  | Br | Et <sub>3</sub> N  | NMP                  | Et <sub>3</sub> N·HCl  | 0.51 | 0.7  | 0.36 | 0.26 | 4.26 | 0.49 | 2.1  | 0.23 | 0.66 | 0.49 | 0.32 | 0.23 |
| C-A-B-A-C | PhCl | OAc  | Br | Et <sub>3</sub> N  | H <sub>2</sub> O     | Et <sub>3</sub> N·HCl  | 0.39 | 0.57 | 0.22 | 0.12 | 5.48 | 0.36 | 1.97 | 0.1  | 0.52 | 0.35 | 0.18 | 0.1  |
| C-A-B-A-D | PhCl | OAc  | Br | Et <sub>3</sub> N  | DMF/H <sub>2</sub> O | Et <sub>3</sub> N·HCl  | 0.63 | 0.93 | 0.59 | 0.49 | 3.22 | 0.72 | 2.33 | 0.46 | 0.77 | 0.72 | 0.55 | 0.46 |
| C-A-B-A-E | PhCl | OAc  | Br | Et <sub>3</sub> N  | NMP/H <sub>2</sub> O | Et <sub>3</sub> N·HCl  | 0.45 | 0.64 | 0.29 | 0.19 | 4.77 | 0.43 | 2.03 | 0.16 | 0.6  | 0.42 | 0.25 | 0.16 |
| C-A-B-B-A | PhCl | OAc  | Br | Et <sub>2</sub> NH | DMF                  | Et <sub>2</sub> NH·HCl | 0.49 | 1.99 | 0.97 | 0.88 | 1.8  | 1.5  | 2.69 | 0.82 | 0.46 | 1.94 | 0.9  | 0.81 |
| C-A-B-B-B | PhCl | OAc  | Br | Et <sub>2</sub> NH | NMP                  | Et <sub>2</sub> NH·HCl | 0.27 | 1.39 | 0.38 | 0.28 | 2.33 | 0.9  | 2.1  | 0.23 | 0.23 | 1.35 | 0.3  | 0.22 |
| C-A-B-B-C | PhCl | OAc  | Br | Et <sub>2</sub> NH | H <sub>2</sub> O     | Et <sub>2</sub> NH·HCl | 0.2  | 1.26 | 0.25 | 0.15 | 2.56 | 0.77 | 1.96 | 0.1  | 0.14 | 1.21 | 0.17 | 0.08 |
| C-A-B-B-D | PhCl | OAc  | Br | Et <sub>2</sub> NH | DMF/H <sub>2</sub> O | Et <sub>2</sub> NH·HCl | 0.38 | 1.62 | 0.61 | 0.51 | 2.06 | 1.13 | 2.33 | 0.46 | 0.34 | 1.58 | 0.53 | 0.45 |
| C-A-B-B-E | PhCl | OAc  | Br | Et <sub>2</sub> NH | NMP/H <sub>2</sub> O | Et <sub>2</sub> NH·HCl | 0.24 | 1.33 | 0.31 | 0.21 | 2.43 | 0.83 | 2.03 | 0.16 | 0.19 | 1.28 | 0.24 | 0.15 |
| C-B-A-A-A | PhCl | Cl   | I  | Et <sub>3</sub> N  | DMF                  | Et <sub>3</sub> N·HCl  | 0.73 | 1.27 | 0.92 | 0.83 | 2.5  | 1.07 | 2.68 | 0.81 | 0.84 | 1.05 | 0.88 | 0.79 |
| C-B-A-A-B | PhCl | Cl   | I  | Et <sub>3</sub> N  | NMP                  | Et <sub>3</sub> N·HCl  | 0.49 | 0.68 | 0.33 | 0.23 | 4.37 | 0.48 | 2.08 | 0.21 | 0.63 | 0.45 | 0.29 | 0.2  |
| C-B-A-A-C | PhCl | Cl   | I  | Et <sub>3</sub> N  | H <sub>2</sub> O     | Et <sub>3</sub> N·HCl  | 0.36 | 0.54 | 0.2  | 0.1  | 5.69 | 0.34 | 1.95 | 0.08 | 0.48 | 0.32 | 0.15 | 0.07 |
| C-B-A-A-D | PhCl | Cl   | I  | Et <sub>3</sub> N  | DMF/H <sub>2</sub> O | Et <sub>3</sub> N·HCl  | 0.62 | 0.91 | 0.56 | 0.46 | 3.27 | 0.71 | 2.31 | 0.44 | 0.76 | 0.69 | 0.52 | 0.43 |
| C-B-A-A-E | PhCl | Cl   | I  | Et <sub>3</sub> N  | NMP/H <sub>2</sub> O | Et <sub>3</sub> N·HCl  | 0.43 | 0.61 | 0.26 | 0.16 | 4.92 | 0.41 | 2.02 | 0.15 | 0.57 | 0.39 | 0.22 | 0.13 |
| C-B-A-B-A | PhCl | Cl   | I  | Et <sub>2</sub> NH | DMF                  | Et <sub>2</sub> NH·HCl | 0.48 | 1.96 | 0.95 | 0.85 | 1.81 | 1.48 | 2.68 | 0.81 | 0.45 | 1.91 | 0.87 | 0.78 |
| C-B-A-B-B | PhCl | Cl   | I  | Et <sub>2</sub> NH | NMP                  | Et <sub>2</sub> NH·HCl | 0.26 | 1.37 | 0.36 | 0.26 | 2.35 | 0.89 | 2.08 | 0.21 | 0.21 | 1.32 | 0.27 | 0.19 |
| C-B-A-B-C | PhCl | Cl   | I  | Et <sub>2</sub> NH | H <sub>2</sub> O     | Et <sub>2</sub> NH·HCl | 0.18 | 1.23 | 0.22 | 0.12 | 2.59 | 0.75 | 1.95 | 0.08 | 0.12 | 1.18 | 0.14 | 0.05 |
| C-B-A-B-D | PhCl | Cl   | I  | Et <sub>2</sub> NH | DMF/H <sub>2</sub> O | Et <sub>2</sub> NH·HCl | 0.37 | 1.6  | 0.59 | 0.49 | 2.07 | 1.12 | 2.31 | 0.44 | 0.33 | 1.55 | 0.5  | 0.42 |
| C-B-A-B-E | PhCl | Cl   | I  | Et <sub>2</sub> NH | NMP/H <sub>2</sub> O | Et <sub>2</sub> NH·HCl | 0.22 | 1.3  | 0.29 | 0.19 | 2.46 | 0.82 | 2.02 | 0.15 | 0.17 | 1.25 | 0.21 | 0.12 |
| C-B-B-A-A | PhCl | Cl   | Br | Et <sub>3</sub> N  | DMF                  | Et <sub>3</sub> N·HCl  | 0.73 | 1.3  | 0.95 | 0.86 | 2.46 | 1.1  | 2.71 | 0.84 | 0.85 | 1.08 | 0.92 | 0.83 |
| C-B-B-A-B | PhCl | Cl   | Br | Et <sub>3</sub> N  | NMP                  | Et <sub>3</sub> N·HCl  | 0.51 | 0.71 | 0.36 | 0.26 | 4.18 | 0.5  | 2.11 | 0.24 | 0.66 | 0.49 | 0.32 | 0.23 |
| C-B-B-A-C | PhCl | Cl   | Br | Et <sub>3</sub> N  | H <sub>2</sub> O     | Et <sub>3</sub> N·HCl  | 0.4  | 0.57 | 0.23 | 0.13 | 5.33 | 0.37 | 1.98 | 0.11 | 0.53 | 0.36 | 0.19 | 0.1  |
| C-B-B-A-D | PhCl | Cl   | Br | Et <sub>3</sub> N  | DMF/H <sub>2</sub> O | Et <sub>3</sub> N·HCl  | 0.63 | 0.94 | 0.59 | 0.49 | 3.19 | 0.73 | 2.34 | 0.47 | 0.77 | 0.72 | 0.55 | 0.46 |
| C-B-B-A-E | PhCl | Cl   | Br | Et <sub>3</sub> N  | NMP/H <sub>2</sub> O | Et <sub>3</sub> N·HCl  | 0.46 | 0.64 | 0.29 | 0.19 | 4.67 | 0.44 | 2.04 | 0.18 | 0.6  | 0.42 | 0.26 | 0.17 |
| C-B-B-B-A | PhCl | Cl   | Br | Et <sub>2</sub> NH | DMF                  | Et <sub>2</sub> NH·HCl | 0.49 | 1.99 | 0.98 | 0.88 | 1.79 | 1.51 | 2.7  | 0.84 | 0.46 | 1.95 | 0.9  | 0.82 |
| C-B-B-B-B | PhCl | Cl   | Br | Et <sub>2</sub> NH | NMP                  | Et <sub>2</sub> NH·HCl | 0.28 | 1.4  | 0.39 | 0.29 | 2.31 | 0.91 | 2.11 | 0.24 | 0.23 | 1.35 | 0.31 | 0.22 |
| C-B-B-B-C | PhCl | Cl   | Br | Et <sub>2</sub> NH | H <sub>2</sub> O     | Et <sub>2</sub> NH·HCl | 0.2  | 1.26 | 0.25 | 0.15 | 2.53 | 0.78 | 1.98 | 0.11 | 0.14 | 1.22 | 0.18 | 0.09 |
| C-B-B-B-D | PhCl | Cl   | Br | Et <sub>2</sub> NH | DMF/H <sub>2</sub> O | Et <sub>2</sub> NH·HCl | 0.38 | 1.63 | 0.62 | 0.52 | 2.05 | 1.14 | 2.34 | 0.47 | 0.34 | 1.58 | 0.54 | 0.45 |
| C-B-B-B-E | PhCl | Cl   | Br | Et <sub>2</sub> NH | NMP/H <sub>2</sub> O | Et <sub>2</sub> NH·HCl | 0.24 | 1.33 | 0.32 | 0.22 | 2.41 | 0.85 | 2.04 | 0.17 | 0.19 | 1.29 | 0.24 | 0.15 |
| C-C-A-A-A | PhCl | acac | I  | Et <sub>3</sub> N  | DMF                  | Et <sub>3</sub> N·HCl  | 0.77 | 1.53 | 1.18 | 1.08 | 1.65 | 2.47 | 4.08 | 2.21 | 0.9  | 1.75 | 1.58 | 1.49 |
| C-C-A-A-B | PhCl | acac | I  | Et <sub>3</sub> N  | NMP                  | Et <sub>3</sub> N·HCl  | 0.63 | 0.93 | 0.59 | 0.49 | 1.86 | 1.88 | 3.49 | 1.62 | 0.86 | 1.16 | 0.99 | 0.9  |
| C-C-A-A-C | PhCl | acac | I  | Et <sub>3</sub> N  | H <sub>2</sub> O     | Et <sub>3</sub> N·HCl  | 0.57 | 0.8  | 0.45 | 0.35 | 1.92 | 1.75 | 3.35 | 1.48 | 0.84 | 1.02 | 0.85 | 0.77 |
| C-C-A-A-D | PhCl | acac | I  | Et <sub>3</sub> N  | DMF/H <sub>2</sub> O | Et <sub>3</sub> N·HCl  | 0.7  | 1.16 | 0.82 | 0.72 | 1.76 | 2.11 | 3.72 | 1.85 | 0.88 | 1.39 | 1.22 | 1.13 |
| C-C-A-A-E | PhCl | acac | I  | Et <sub>3</sub> N  | NMP/H <sub>2</sub> O | Et <sub>3</sub> N·HCl  | 0.6  | 0.87 | 0.52 | 0.42 | 1.89 | 1.81 | 3.42 | 1.55 | 0.85 | 1.09 | 0.92 | 0.83 |
| C-C-A-B-A | PhCl | acac | I  | Et <sub>2</sub> NH | DMF                  | Et <sub>2</sub> NH·HCl | 0.54 | 2.22 | 1.21 | 1.11 | 1.42 | 2.88 | 4.08 | 2.21 | 0.6  | 2.61 | 1.57 | 1.48 |
| C-C-A-B-B | PhCl | acac | I  | Et <sub>2</sub> NH | NMP                  | Et <sub>2</sub> NH·HCl | 0.38 | 1.62 | 0.61 | 0.51 | 1.52 | 2.29 | 3.48 | 1.62 | 0.48 | 2.02 | 0.97 | 0.89 |
| C-C-A-B-C | PhCl | acac | I  | Et <sub>2</sub> NH | H <sub>2</sub> O     | Et <sub>2</sub> NH·HCl | 0.32 | 1.49 | 0.48 | 0.38 | 1.56 | 2.15 | 3.35 | 1.48 | 0.45 | 1.88 | 0.84 | 0.75 |
| C-C-A-B-D | PhCl | acac | I  | Et <sub>2</sub> NH | DMF/H <sub>2</sub> O | Et <sub>2</sub> NH·HCl | 0.45 | 1.85 | 0.84 | 0.74 | 1.48 | 2.52 | 3.71 | 1.85 | 0.54 | 2.25 | 1.2  | 1.12 |
| C-C-A-B-E | PhCl | acac | I  | Et <sub>2</sub> NH | NMP/H <sub>2</sub> O | Et <sub>2</sub> NH·HCl | 0.35 | 1.56 | 0.54 | 0.45 | 1.54 | 2.22 | 3.42 | 1.55 | 0.47 | 1.95 | 0.91 | 0.82 |
| C-C-B-A-A | PhCl | acac | Br | Et <sub>3</sub> N  | DMF                  | Et <sub>3</sub> N·HCl  | 0.78 | 1.56 | 1.21 | 1.11 | 1.64 | 2.5  | 4.11 | 2.24 | 0.91 | 1.78 | 1.62 | 1.53 |
| C-C-B-A-B | PhCl | acac | Br | Et <sub>3</sub> N  | NMP                  | Et <sub>3</sub> N·HCl  | 0.64 | 0.96 | 0.62 | 0.52 | 1.84 | 1.91 | 3.51 | 1.65 | 0.86 | 1.19 | 1.02 | 0.94 |
| C-C-B-A-C | PhCl | acac | Br | Et <sub>3</sub> N  | H <sub>2</sub> O     | Et <sub>3</sub> N·HCl  | 0.58 | 0.83 | 0.48 | 0.38 | 1.91 | 1.77 | 3.38 | 1.51 | 0.84 | 1.06 | 0.89 | 0.8  |
| C-C-B-A-D | PhCl | acac | Br | Et <sub>3</sub> N  | DMF/H <sub>2</sub> O | Et <sub>3</sub> N·HCl  | 0.71 | 1.19 | 0.85 | 0.75 | 1.75 | 2.14 | 3.74 | 1.88 | 0.88 | 1.42 | 1.25 | 1.17 |
| C-C-B-A-E | PhCl | acac | Br | Et <sub>3</sub> N  | NMP/H <sub>2</sub> O | Et <sub>3</sub> N·HCl  | 0.61 | 0.9  | 0.55 | 0.45 | 1.87 | 1.84 | 3.45 | 1.58 | 0.85 | 1.12 | 0.96 | 0.87 |
| C-C-B-B-A | PhCl | acac | Br | Et <sub>2</sub> NH | DMF                  | Et <sub>2</sub> NH·HCl | 0.55 | 2.25 | 1.23 | 1.14 | 1.41 | 2.91 | 4.11 | 2.24 | 0.61 | 2.65 | 1.6  | 1.52 |

|           |      |      |    |                    |                      |                        |      |      |      |      |      |      |      |      |      |      |      |      |
|-----------|------|------|----|--------------------|----------------------|------------------------|------|------|------|------|------|------|------|------|------|------|------|------|
| C-C-B-B-B | PhCl | acac | Br | Et <sub>2</sub> NH | NMP                  | Et <sub>2</sub> NH·HCl | 0.39 | 1.65 | 0.64 | 0.54 | 1.52 | 2.32 | 3.51 | 1.64 | 0.49 | 2.05 | 1.01 | 0.92 |
| C-C-B-B-C | PhCl | acac | Br | Et <sub>2</sub> NH | H <sub>2</sub> O     | Et <sub>2</sub> NH·HCl | 0.33 | 1.52 | 0.51 | 0.41 | 1.55 | 2.18 | 3.38 | 1.51 | 0.46 | 1.92 | 0.88 | 0.79 |
| C-C-B-B-D | PhCl | acac | Br | Et <sub>2</sub> NH | DMF/H <sub>2</sub> O | Et <sub>2</sub> NH·HCl | 0.46 | 1.88 | 0.87 | 0.77 | 1.47 | 2.55 | 3.74 | 1.87 | 0.54 | 2.28 | 1.24 | 1.15 |
| C-C-B-B-E | PhCl | acac | Br | Et <sub>2</sub> NH | NMP/H <sub>2</sub> O | Et <sub>2</sub> NH·HCl | 0.36 | 1.59 | 0.57 | 0.47 | 1.53 | 2.25 | 3.45 | 1.58 | 0.47 | 1.99 | 0.94 | 0.86 |

Target product P (1-nitro-3-((4-nitrophenyl)ethynyl)benzene) and starting material SM1 (1-ethynyl-3-nitrobenzene) are not shown. R-I, 1-iodo-4-nitrobenzene; R-Br, 1-bromo-4-nitrobenzene; R-Cl, 1-chloro-4-nitrobenzene; DMF, dimethylformamide; NMP, *N*-methylpyrrolidone; BF, bio-Factor; CP<sub>i</sub>, initial cytotoxicity potential; CP<sub>f</sub>, final cytotoxicity potential; CP<sub>f,rel</sub>, relative final cytotoxicity potential. The reactions with the five lowest CPs are highlighted with green. Organic solvents mixed with water at a 1:1 mass ratio are indicated as solvent/H<sub>2</sub>O.

**Table S6.** bio-Factors and cytotoxicity potentials for synthesis of 1-((4-methoxyphenyl)ethynyl)-3-nitrobenzene.

| Reaction  | Starting materials (SM2) | Catalyst (CT1) PdA <sub>2</sub> | Catalyst (CT2) CuX | Reagent (R)        | Solvent (S)          | Byproduct (BP)        | CaCo-2 |                 |                 |                     | FRSN |                 |                 |                     | HEK293T |                 |                 |                     |
|-----------|--------------------------|---------------------------------|--------------------|--------------------|----------------------|-----------------------|--------|-----------------|-----------------|---------------------|------|-----------------|-----------------|---------------------|---------|-----------------|-----------------|---------------------|
|           |                          |                                 |                    |                    |                      |                       | BF     | CP <sub>i</sub> | CP <sub>f</sub> | CP <sub>f,rel</sub> | BF   | CP <sub>i</sub> | CP <sub>f</sub> | CP <sub>f,rel</sub> | BF      | CP <sub>i</sub> | CP <sub>f</sub> | CP <sub>f,rel</sub> |
| A-A-A-A-A | R-I                      | OAc                             | I                  | Et <sub>3</sub> N  | DMF                  | Et <sub>3</sub> N·HI  | 0.82   | 1.25            | 1.02            | 0.82                | 0.86 | 1.06            | 0.91            | 0.8                 | 1.16    | 1.04            | 1.21            | 0.78                |
| A-A-A-A-B | R-I                      | OAc                             | I                  | Et <sub>3</sub> N  | NMP                  | Et <sub>3</sub> N·HI  | 0.65   | 0.65            | 0.42            | 0.23                | 0.68 | 0.46            | 0.31            | 0.21                | 1.38    | 0.45            | 0.62            | 0.19                |
| A-A-A-A-C | R-I                      | OAc                             | I                  | Et <sub>3</sub> N  | H <sub>2</sub> O     | Et <sub>3</sub> N·HI  | 0.56   | 0.52            | 0.29            | 0.1                 | 0.54 | 0.33            | 0.18            | 0.07                | 1.54    | 0.32            | 0.48            | 0.05                |
| A-A-A-A-D | R-I                      | OAc                             | I                  | Et <sub>3</sub> N  | DMF/H <sub>2</sub> O | Et <sub>3</sub> N·HI  | 0.74   | 0.88            | 0.65            | 0.46                | 0.78 | 0.7             | 0.54            | 0.44                | 1.25    | 0.68            | 0.85            | 0.42                |
| A-A-A-A-E | R-I                      | OAc                             | I                  | Et <sub>3</sub> N  | NMP/H <sub>2</sub> O | Et <sub>3</sub> N·HI  | 0.61   | 0.59            | 0.36            | 0.16                | 0.62 | 0.4             | 0.25            | 0.14                | 1.44    | 0.38            | 0.55            | 0.12                |
| A-A-A-B-A | R-I                      | OAc                             | I                  | Et <sub>2</sub> NH | DMF                  | Et <sub>2</sub> NH·HI | 0.55   | 1.94            | 1.06            | 0.87                | 0.62 | 1.47            | 0.91            | 0.8                 | 0.63    | 1.91            | 1.21            | 0.77                |
| A-A-A-B-B | R-I                      | OAc                             | I                  | Et <sub>2</sub> NH | NMP                  | Et <sub>2</sub> NH·HI | 0.35   | 1.34            | 0.47            | 0.28                | 0.36 | 0.87            | 0.31            | 0.21                | 0.47    | 1.31            | 0.61            | 0.18                |
| A-A-A-B-C | R-I                      | OAc                             | I                  | Et <sub>2</sub> NH | H <sub>2</sub> O     | Et <sub>2</sub> NH·HI | 0.28   | 1.21            | 0.34            | 0.14                | 0.24 | 0.74            | 0.18            | 0.07                | 0.41    | 1.18            | 0.48            | 0.05                |
| A-A-A-B-D | R-I                      | OAc                             | I                  | Et <sub>2</sub> NH | DMF/H <sub>2</sub> O | Et <sub>2</sub> NH·HI | 0.44   | 1.57            | 0.7             | 0.51                | 0.49 | 1.1             | 0.54            | 0.44                | 0.55    | 1.54            | 0.84            | 0.41                |
| A-A-A-B-E | R-I                      | OAc                             | I                  | Et <sub>2</sub> NH | NMP/H <sub>2</sub> O | Et <sub>2</sub> NH·HI | 0.32   | 1.28            | 0.4             | 0.21                | 0.3  | 0.81            | 0.24            | 0.14                | 0.44    | 1.25            | 0.55            | 0.11                |
| A-A-B-A-A | R-I                      | OAc                             | Br                 | Et <sub>3</sub> N  | DMF                  | Et <sub>3</sub> N·HI  | 0.82   | 1.28            | 1.05            | 0.85                | 0.86 | 1.09            | 0.94            | 0.83                | 1.16    | 1.08            | 1.25            | 0.82                |
| A-A-B-A-B | R-I                      | OAc                             | Br                 | Et <sub>3</sub> N  | NMP                  | Et <sub>3</sub> N·HI  | 0.67   | 0.68            | 0.45            | 0.26                | 0.69 | 0.49            | 0.34            | 0.24                | 1.35    | 0.48            | 0.65            | 0.22                |
| A-A-B-A-C | R-I                      | OAc                             | Br                 | Et <sub>3</sub> N  | H <sub>2</sub> O     | Et <sub>3</sub> N·HI  | 0.58   | 0.55            | 0.32            | 0.13                | 0.58 | 0.36            | 0.21            | 0.1                 | 1.48    | 0.35            | 0.52            | 0.09                |
| A-A-B-A-D | R-I                      | OAc                             | Br                 | Et <sub>3</sub> N  | DMF/H <sub>2</sub> O | Et <sub>3</sub> N·HI  | 0.75   | 0.91            | 0.68            | 0.49                | 0.79 | 0.72            | 0.57            | 0.47                | 1.24    | 0.71            | 0.88            | 0.45                |
| A-A-B-A-E | R-I                      | OAc                             | Br                 | Et <sub>3</sub> N  | NMP/H <sub>2</sub> O | Et <sub>3</sub> N·HI  | 0.63   | 0.62            | 0.39            | 0.19                | 0.65 | 0.43            | 0.28            | 0.17                | 1.41    | 0.42            | 0.59            | 0.16                |
| A-A-B-B-A | R-I                      | OAc                             | Br                 | Et <sub>2</sub> NH | DMF                  | Et <sub>2</sub> NH·HI | 0.56   | 1.97            | 1.09            | 0.9                 | 0.62 | 1.5             | 0.93            | 0.83                | 0.64    | 1.94            | 1.24            | 0.81                |
| A-A-B-B-B | R-I                      | OAc                             | Br                 | Et <sub>2</sub> NH | NMP                  | Et <sub>2</sub> NH·HI | 0.36   | 1.37            | 0.5             | 0.31                | 0.38 | 0.9             | 0.34            | 0.23                | 0.48    | 1.35            | 0.65            | 0.22                |
| A-A-B-B-C | R-I                      | OAc                             | Br                 | Et <sub>2</sub> NH | H <sub>2</sub> O     | Et <sub>2</sub> NH·HI | 0.29   | 1.24            | 0.37            | 0.17                | 0.27 | 0.77            | 0.21            | 0.1                 | 0.42    | 1.21            | 0.51            | 0.08                |
| A-A-B-B-D | R-I                      | OAc                             | Br                 | Et <sub>2</sub> NH | DMF/H <sub>2</sub> O | Et <sub>2</sub> NH·HI | 0.45   | 1.6             | 0.73            | 0.54                | 0.5  | 1.13            | 0.57            | 0.46                | 0.56    | 1.58            | 0.88            | 0.45                |
| A-A-B-B-E | R-I                      | OAc                             | Br                 | Et <sub>2</sub> NH | NMP/H <sub>2</sub> O | Et <sub>2</sub> NH·HI | 0.33   | 1.31            | 0.43            | 0.24                | 0.33 | 0.84            | 0.27            | 0.17                | 0.45    | 1.28            | 0.58            | 0.15                |
| A-B-A-A-A | R-I                      | Cl                              | I                  | Et <sub>3</sub> N  | DMF                  | Et <sub>3</sub> N·HI  | 0.82   | 1.25            | 1.02            | 0.83                | 0.86 | 1.07            | 0.92            | 0.81                | 1.16    | 1.05            | 1.22            | 0.79                |
| A-B-A-A-B | R-I                      | Cl                              | I                  | Et <sub>3</sub> N  | NMP                  | Et <sub>3</sub> N·HI  | 0.65   | 0.66            | 0.43            | 0.24                | 0.68 | 0.48            | 0.33            | 0.22                | 1.37    | 0.45            | 0.62            | 0.19                |
| A-B-A-A-C | R-I                      | Cl                              | I                  | Et <sub>3</sub> N  | H <sub>2</sub> O     | Et <sub>3</sub> N·HI  | 0.56   | 0.52            | 0.3             | 0.1                 | 0.56 | 0.34            | 0.19            | 0.09                | 1.53    | 0.32            | 0.49            | 0.06                |
| A-B-A-A-D | R-I                      | Cl                              | I                  | Et <sub>3</sub> N  | DMF/H <sub>2</sub> O | Et <sub>3</sub> N·HI  | 0.74   | 0.89            | 0.66            | 0.47                | 0.79 | 0.71            | 0.56            | 0.45                | 1.25    | 0.68            | 0.85            | 0.42                |
| A-B-A-A-E | R-I                      | Cl                              | I                  | Et <sub>3</sub> N  | NMP/H <sub>2</sub> O | Et <sub>3</sub> N·HI  | 0.61   | 0.59            | 0.36            | 0.17                | 0.63 | 0.41            | 0.26            | 0.15                | 1.44    | 0.39            | 0.56            | 0.12                |
| A-B-A-B-A | R-I                      | Cl                              | I                  | Et <sub>2</sub> NH | DMF                  | Et <sub>2</sub> NH·HI | 0.55   | 1.94            | 1.07            | 0.87                | 0.62 | 1.48            | 0.92            | 0.81                | 0.63    | 1.91            | 1.21            | 0.78                |
| A-B-A-B-B | R-I                      | Cl                              | I                  | Et <sub>2</sub> NH | NMP                  | Et <sub>2</sub> NH·HI | 0.35   | 1.35            | 0.47            | 0.28                | 0.36 | 0.89            | 0.32            | 0.22                | 0.47    | 1.32            | 0.62            | 0.19                |
| A-B-A-B-C | R-I                      | Cl                              | I                  | Et <sub>2</sub> NH | H <sub>2</sub> O     | Et <sub>2</sub> NH·HI | 0.28   | 1.21            | 0.34            | 0.15                | 0.25 | 0.75            | 0.19            | 0.08                | 0.41    | 1.18            | 0.48            | 0.05                |
| A-B-A-B-D | R-I                      | Cl                              | I                  | Et <sub>2</sub> NH | DMF/H <sub>2</sub> O | Et <sub>2</sub> NH·HI | 0.45   | 1.58            | 0.7             | 0.51                | 0.5  | 1.12            | 0.55            | 0.45                | 0.55    | 1.55            | 0.85            | 0.42                |
| A-B-A-B-E | R-I                      | Cl                              | I                  | Et <sub>2</sub> NH | NMP/H <sub>2</sub> O | Et <sub>2</sub> NH·HI | 0.32   | 1.28            | 0.41            | 0.21                | 0.31 | 0.82            | 0.26            | 0.15                | 0.44    | 1.25            | 0.55            | 0.12                |
| A-B-B-A-A | R-I                      | Cl                              | Br                 | Et <sub>3</sub> N  | DMF                  | Et <sub>3</sub> N·HI  | 0.82   | 1.28            | 1.05            | 0.86                | 0.86 | 1.1             | 0.95            | 0.84                | 1.16    | 1.08            | 1.25            | 0.82                |
| A-B-B-A-B | R-I                      | Cl                              | Br                 | Et <sub>3</sub> N  | NMP                  | Et <sub>3</sub> N·HI  | 0.67   | 0.69            | 0.46            | 0.27                | 0.7  | 0.51            | 0.35            | 0.25                | 1.35    | 0.49            | 0.66            | 0.23                |
| A-B-B-A-C | R-I                      | Cl                              | Br                 | Et <sub>3</sub> N  | H <sub>2</sub> O     | Et <sub>3</sub> N·HI  | 0.59   | 0.55            | 0.33            | 0.13                | 0.59 | 0.37            | 0.22            | 0.11                | 1.48    | 0.36            | 0.52            | 0.09                |
| A-B-B-A-D | R-I                      | Cl                              | Br                 | Et <sub>3</sub> N  | DMF/H <sub>2</sub> O | Et <sub>3</sub> N·HI  | 0.75   | 0.92            | 0.69            | 0.5                 | 0.79 | 0.74            | 0.58            | 0.48                | 1.24    | 0.72            | 0.89            | 0.46                |
| A-B-B-A-E | R-I                      | Cl                              | Br                 | Et <sub>3</sub> N  | NMP/H <sub>2</sub> O | Et <sub>3</sub> N·HI  | 0.63   | 0.62            | 0.39            | 0.2                 | 0.66 | 0.44            | 0.29            | 0.18                | 1.4     | 0.42            | 0.59            | 0.16                |
| A-B-B-B-A | R-I                      | Cl                              | Br                 | Et <sub>2</sub> NH | DMF                  | Et <sub>2</sub> NH·HI | 0.56   | 1.97            | 1.1             | 0.9                 | 0.63 | 1.51            | 0.95            | 0.84                | 0.64    | 1.95            | 1.25            | 0.81                |
| A-B-B-B-B | R-I                      | Cl                              | Br                 | Et <sub>2</sub> NH | NMP                  | Et <sub>2</sub> NH·HI | 0.37   | 1.38            | 0.5             | 0.31                | 0.38 | 0.91            | 0.35            | 0.25                | 0.48    | 1.35            | 0.65            | 0.22                |
| A-B-B-B-C | R-I                      | Cl                              | Br                 | Et <sub>2</sub> NH | H <sub>2</sub> O     | Et <sub>2</sub> NH·HI | 0.3    | 1.24            | 0.37            | 0.18                | 0.28 | 0.78            | 0.22            | 0.11                | 0.43    | 1.22            | 0.52            | 0.09                |
| A-B-B-B-D | R-I                      | Cl                              | Br                 | Et <sub>2</sub> NH | DMF/H <sub>2</sub> O | Et <sub>2</sub> NH·HI | 0.46   | 1.61            | 0.73            | 0.54                | 0.51 | 1.14            | 0.58            | 0.48                | 0.56    | 1.58            | 0.88            | 0.45                |
| A-B-B-B-E | R-I                      | Cl                              | Br                 | Et <sub>2</sub> NH | NMP/H <sub>2</sub> O | Et <sub>2</sub> NH·HI | 0.33   | 1.31            | 0.44            | 0.24                | 0.34 | 0.85            | 0.28            | 0.18                | 0.46    | 1.28            | 0.59            | 0.15                |
| A-C-A-A-A | R-I                      | acac                            | I                  | Et <sub>3</sub> N  | DMF                  | Et <sub>3</sub> N·HI  | 0.85   | 1.51            | 1.28            | 1.09                | 0.94 | 2.47            | 2.32            | 2.22                | 1.1     | 1.75            | 1.92            | 1.49                |

|           |      |      |    |                    |                      |                        |      |      |      |      |      |      |      |      |      |      |      |      |
|-----------|------|------|----|--------------------|----------------------|------------------------|------|------|------|------|------|------|------|------|------|------|------|------|
| A-C-A-A-B | R-I  | acac | I  | Et <sub>3</sub> N  | NMP                  | Et <sub>3</sub> N·HI   | 0.75 | 0.91 | 0.69 | 0.49 | 0.92 | 1.88 | 1.73 | 1.62 | 1.15 | 1.15 | 1.32 | 0.89 |
| A-C-A-A-C | R-I  | acac | I  | Et <sub>3</sub> N  | H <sub>2</sub> O     | Et <sub>3</sub> N·HI   | 0.71 | 0.78 | 0.55 | 0.36 | 0.91 | 1.75 | 1.59 | 1.49 | 1.17 | 1.02 | 1.19 | 0.76 |
| A-C-A-A-D | R-I  | acac | I  | Et <sub>3</sub> N  | DMF/H <sub>2</sub> O | Et <sub>3</sub> N·HI   | 0.8  | 1.14 | 0.92 | 0.72 | 0.93 | 2.11 | 1.96 | 1.85 | 1.12 | 1.38 | 1.55 | 1.12 |
| A-C-A-A-E | R-I  | acac | I  | Et <sub>3</sub> N  | NMP/H <sub>2</sub> O | Et <sub>3</sub> N·HI   | 0.73 | 0.85 | 0.62 | 0.42 | 0.92 | 1.81 | 1.66 | 1.56 | 1.16 | 1.09 | 1.26 | 0.83 |
| A-C-A-B-A | R-I  | acac | I  | Et <sub>2</sub> NH | DMF                  | Et <sub>2</sub> NH·HI  | 0.6  | 2.2  | 1.32 | 1.13 | 0.8  | 2.88 | 2.32 | 2.21 | 0.73 | 2.61 | 1.91 | 1.48 |
| A-C-A-B-B | R-I  | acac | I  | Et <sub>2</sub> NH | NMP                  | Et <sub>2</sub> NH·HI  | 0.46 | 1.6  | 0.73 | 0.54 | 0.75 | 2.29 | 1.73 | 1.62 | 0.65 | 2.02 | 1.32 | 0.89 |
| A-C-A-B-C | R-I  | acac | I  | Et <sub>2</sub> NH | H <sub>2</sub> O     | Et <sub>2</sub> NH·HI  | 0.41 | 1.47 | 0.6  | 0.4  | 0.74 | 2.15 | 1.59 | 1.49 | 0.63 | 1.88 | 1.18 | 0.75 |
| A-C-A-B-D | R-I  | acac | I  | Et <sub>2</sub> NH | DMF/H <sub>2</sub> O | Et <sub>2</sub> NH·HI  | 0.52 | 1.83 | 0.96 | 0.77 | 0.78 | 2.52 | 1.96 | 1.85 | 0.69 | 2.25 | 1.55 | 1.12 |
| A-C-A-B-E | R-I  | acac | I  | Et <sub>2</sub> NH | NMP/H <sub>2</sub> O | Et <sub>2</sub> NH·HI  | 0.43 | 1.54 | 0.66 | 0.47 | 0.75 | 2.22 | 1.66 | 1.55 | 0.64 | 1.95 | 1.25 | 0.82 |
| A-C-B-A-A | R-I  | acac | Br | Et <sub>3</sub> N  | DMF                  | Et <sub>3</sub> N·HI   | 0.85 | 1.54 | 1.31 | 1.12 | 0.94 | 2.5  | 2.35 | 2.25 | 1.09 | 1.78 | 1.95 | 1.52 |
| A-C-B-A-B | R-I  | acac | Br | Et <sub>3</sub> N  | NMP                  | Et <sub>3</sub> N·HI   | 0.76 | 0.94 | 0.72 | 0.52 | 0.92 | 1.91 | 1.76 | 1.65 | 1.14 | 1.19 | 1.36 | 0.93 |
| A-C-B-A-C | R-I  | acac | Br | Et <sub>3</sub> N  | H <sub>2</sub> O     | Et <sub>3</sub> N·HI   | 0.72 | 0.81 | 0.58 | 0.39 | 0.91 | 1.77 | 1.62 | 1.52 | 1.16 | 1.06 | 1.22 | 0.79 |
| A-C-B-A-D | R-I  | acac | Br | Et <sub>3</sub> N  | DMF/H <sub>2</sub> O | Et <sub>3</sub> N·HI   | 0.81 | 1.17 | 0.95 | 0.75 | 0.93 | 2.14 | 1.99 | 1.88 | 1.12 | 1.42 | 1.59 | 1.16 |
| A-C-B-A-E | R-I  | acac | Br | Et <sub>3</sub> N  | NMP/H <sub>2</sub> O | Et <sub>3</sub> N·HI   | 0.74 | 0.88 | 0.65 | 0.45 | 0.92 | 1.84 | 1.69 | 1.58 | 1.15 | 1.12 | 1.29 | 0.86 |
| A-C-B-B-A | R-I  | acac | Br | Et <sub>2</sub> NH | DMF                  | Et <sub>2</sub> NH·HI  | 0.61 | 2.23 | 1.35 | 1.16 | 0.81 | 2.91 | 2.35 | 2.24 | 0.74 | 2.65 | 1.95 | 1.51 |
| A-C-B-B-B | R-I  | acac | Br | Et <sub>2</sub> NH | NMP                  | Et <sub>2</sub> NH·HI  | 0.47 | 1.63 | 0.76 | 0.57 | 0.76 | 2.32 | 1.75 | 1.65 | 0.66 | 2.05 | 1.35 | 0.92 |
| A-C-B-B-C | R-I  | acac | Br | Et <sub>2</sub> NH | H <sub>2</sub> O     | Et <sub>2</sub> NH·HI  | 0.42 | 1.5  | 0.63 | 0.43 | 0.74 | 2.18 | 1.62 | 1.51 | 0.64 | 1.92 | 1.22 | 0.79 |
| A-C-B-B-D | R-I  | acac | Br | Et <sub>2</sub> NH | DMF/H <sub>2</sub> O | Et <sub>2</sub> NH·HI  | 0.53 | 1.86 | 0.99 | 0.8  | 0.78 | 2.55 | 1.98 | 1.88 | 0.69 | 2.28 | 1.58 | 1.15 |
| A-C-B-B-E | R-I  | acac | Br | Et <sub>2</sub> NH | NMP/H <sub>2</sub> O | Et <sub>2</sub> NH·HI  | 0.44 | 1.57 | 0.69 | 0.5  | 0.75 | 2.25 | 1.69 | 1.58 | 0.65 | 1.99 | 1.29 | 0.85 |
| B-A-A-A-A | R-Br | OAc  | I  | Et <sub>3</sub> N  | DMF                  | Et <sub>3</sub> N·HBr  | 0.75 | 1.33 | 1    | 0.81 | 0.81 | 1.13 | 0.91 | 0.8  | 1.15 | 1.06 | 1.21 | 0.78 |
| B-A-A-A-B | R-Br | OAc  | I  | Et <sub>3</sub> N  | NMP                  | Et <sub>3</sub> N·HBr  | 0.55 | 0.74 | 0.41 | 0.21 | 0.59 | 0.53 | 0.31 | 0.21 | 1.33 | 0.46 | 0.61 | 0.18 |
| B-A-A-A-C | R-Br | OAc  | I  | Et <sub>3</sub> N  | H <sub>2</sub> O     | Et <sub>3</sub> N·HBr  | 0.45 | 0.6  | 0.27 | 0.08 | 0.45 | 0.4  | 0.18 | 0.08 | 1.47 | 0.33 | 0.48 | 0.05 |
| B-A-A-A-D | R-Br | OAc  | I  | Et <sub>3</sub> N  | DMF/H <sub>2</sub> O | Et <sub>3</sub> N·HBr  | 0.66 | 0.97 | 0.64 | 0.44 | 0.71 | 0.76 | 0.54 | 0.44 | 1.22 | 0.69 | 0.84 | 0.41 |
| B-A-A-A-E | R-Br | OAc  | I  | Et <sub>3</sub> N  | NMP/H <sub>2</sub> O | Et <sub>3</sub> N·HBr  | 0.51 | 0.67 | 0.34 | 0.14 | 0.53 | 0.47 | 0.25 | 0.14 | 1.39 | 0.39 | 0.55 | 0.12 |
| B-A-A-B-A | R-Br | OAc  | I  | Et <sub>2</sub> NH | DMF                  | Et <sub>2</sub> NH·HBr | 0.49 | 2.02 | 0.99 | 0.79 | 0.59 | 1.54 | 0.91 | 0.81 | 0.64 | 1.92 | 1.22 | 0.79 |
| B-A-A-B-B | R-Br | OAc  | I  | Et <sub>2</sub> NH | NMP                  | Et <sub>2</sub> NH·HBr | 0.28 | 1.43 | 0.39 | 0.2  | 0.34 | 0.94 | 0.32 | 0.21 | 0.47 | 1.32 | 0.63 | 0.2  |
| B-A-A-B-C | R-Br | OAc  | I  | Et <sub>2</sub> NH | H <sub>2</sub> O     | Et <sub>2</sub> NH·HBr | 0.2  | 1.29 | 0.26 | 0.07 | 0.23 | 0.81 | 0.19 | 0.08 | 0.42 | 1.19 | 0.49 | 0.06 |
| B-A-A-B-D | R-Br | OAc  | I  | Et <sub>2</sub> NH | DMF/H <sub>2</sub> O | Et <sub>2</sub> NH·HBr | 0.38 | 1.66 | 0.62 | 0.43 | 0.47 | 1.17 | 0.55 | 0.44 | 0.55 | 1.55 | 0.86 | 0.43 |
| B-A-A-B-E | R-Br | OAc  | I  | Et <sub>2</sub> NH | NMP/H <sub>2</sub> O | Et <sub>2</sub> NH·HBr | 0.24 | 1.36 | 0.33 | 0.13 | 0.29 | 0.88 | 0.25 | 0.15 | 0.45 | 1.26 | 0.56 | 0.13 |
| B-A-B-A-A | R-Br | OAc  | Br | Et <sub>3</sub> N  | DMF                  | Et <sub>3</sub> N·HBr  | 0.76 | 1.36 | 1.03 | 0.84 | 0.81 | 1.16 | 0.94 | 0.83 | 1.14 | 1.09 | 1.24 | 0.81 |
| B-A-B-A-B | R-Br | OAc  | Br | Et <sub>3</sub> N  | NMP                  | Et <sub>3</sub> N·HBr  | 0.57 | 0.77 | 0.44 | 0.24 | 0.61 | 0.56 | 0.34 | 0.24 | 1.31 | 0.5  | 0.65 | 0.22 |
| B-A-B-A-C | R-Br | OAc  | Br | Et <sub>3</sub> N  | H <sub>2</sub> O     | Et <sub>3</sub> N·HBr  | 0.48 | 0.63 | 0.3  | 0.11 | 0.49 | 0.43 | 0.21 | 0.1  | 1.42 | 0.36 | 0.52 | 0.08 |
| B-A-B-A-D | R-Br | OAc  | Br | Et <sub>3</sub> N  | DMF/H <sub>2</sub> O | Et <sub>3</sub> N·HBr  | 0.67 | 1    | 0.67 | 0.47 | 0.72 | 0.79 | 0.57 | 0.47 | 1.21 | 0.73 | 0.88 | 0.45 |
| B-A-B-A-E | R-Br | OAc  | Br | Et <sub>3</sub> N  | NMP/H <sub>2</sub> O | Et <sub>3</sub> N·HBr  | 0.53 | 0.7  | 0.37 | 0.17 | 0.56 | 0.5  | 0.28 | 0.17 | 1.36 | 0.43 | 0.58 | 0.15 |
| B-A-B-B-A | R-Br | OAc  | Br | Et <sub>2</sub> NH | DMF                  | Et <sub>2</sub> NH·HBr | 0.5  | 2.05 | 1.02 | 0.82 | 0.6  | 1.57 | 0.94 | 0.84 | 0.64 | 1.95 | 1.26 | 0.83 |
| B-A-B-B-B | R-Br | OAc  | Br | Et <sub>2</sub> NH | NMP                  | Et <sub>2</sub> NH·HBr | 0.29 | 1.46 | 0.42 | 0.23 | 0.36 | 0.97 | 0.35 | 0.24 | 0.49 | 1.36 | 0.66 | 0.23 |
| B-A-B-B-C | R-Br | OAc  | Br | Et <sub>2</sub> NH | H <sub>2</sub> O     | Et <sub>2</sub> NH·HBr | 0.22 | 1.32 | 0.29 | 0.1  | 0.26 | 0.84 | 0.21 | 0.11 | 0.43 | 1.23 | 0.53 | 0.1  |
| B-A-B-B-D | R-Br | OAc  | Br | Et <sub>2</sub> NH | DMF/H <sub>2</sub> O | Et <sub>2</sub> NH·HBr | 0.39 | 1.69 | 0.65 | 0.46 | 0.48 | 1.2  | 0.58 | 0.47 | 0.56 | 1.59 | 0.89 | 0.46 |
| B-A-B-B-E | R-Br | OAc  | Br | Et <sub>2</sub> NH | NMP/H <sub>2</sub> O | Et <sub>2</sub> NH·HBr | 0.26 | 1.39 | 0.36 | 0.16 | 0.31 | 0.9  | 0.28 | 0.18 | 0.46 | 1.29 | 0.6  | 0.17 |
| B-B-A-A-A | R-Br | Cl   | I  | Et <sub>3</sub> N  | DMF                  | Et <sub>3</sub> N·HBr  | 0.75 | 1.34 | 1    | 0.81 | 0.81 | 1.14 | 0.92 | 0.82 | 1.14 | 1.06 | 1.21 | 0.78 |
| B-B-A-A-B | R-Br | Cl   | I  | Et <sub>3</sub> N  | NMP                  | Et <sub>3</sub> N·HBr  | 0.55 | 0.74 | 0.41 | 0.22 | 0.6  | 0.55 | 0.33 | 0.22 | 1.33 | 0.47 | 0.62 | 0.19 |
| B-B-A-A-C | R-Br | Cl   | I  | Et <sub>3</sub> N  | H <sub>2</sub> O     | Et <sub>3</sub> N·HBr  | 0.45 | 0.61 | 0.28 | 0.08 | 0.47 | 0.41 | 0.19 | 0.09 | 1.46 | 0.33 | 0.49 | 0.05 |
| B-B-A-A-D | R-Br | Cl   | I  | Et <sub>3</sub> N  | DMF/H <sub>2</sub> O | Et <sub>3</sub> N·HBr  | 0.66 | 0.97 | 0.64 | 0.45 | 0.72 | 0.78 | 0.56 | 0.45 | 1.22 | 0.7  | 0.85 | 0.42 |
| B-B-A-A-E | R-Br | Cl   | I  | Et <sub>3</sub> N  | NMP/H <sub>2</sub> O | Et <sub>3</sub> N·HBr  | 0.51 | 0.67 | 0.34 | 0.15 | 0.54 | 0.48 | 0.26 | 0.15 | 1.38 | 0.4  | 0.55 | 0.12 |
| B-B-A-B-A | R-Br | Cl   | I  | Et <sub>2</sub> NH | DMF                  | Et <sub>2</sub> NH·HBr | 0.49 | 2.03 | 0.99 | 0.8  | 0.6  | 1.55 | 0.93 | 0.82 | 0.64 | 1.92 | 1.23 | 0.8  |



|           |      |      |    |                    |                      |                        |      |      |      |      |      |      |      |      |      |      |      |      |
|-----------|------|------|----|--------------------|----------------------|------------------------|------|------|------|------|------|------|------|------|------|------|------|------|
| B-B-A-B-B | R-Br | Cl   | I  | Et <sub>2</sub> NH | NMP                  | Et <sub>2</sub> NH·HBr | 0.28 | 1.43 | 0.4  | 0.2  | 0.35 | 0.95 | 0.33 | 0.23 | 0.48 | 1.33 | 0.63 | 0.2  |
| B-B-A-B-C | R-Br | Cl   | I  | Et <sub>2</sub> NH | H <sub>2</sub> O     | Et <sub>2</sub> NH·HBr | 0.2  | 1.3  | 0.27 | 0.07 | 0.24 | 0.82 | 0.2  | 0.09 | 0.42 | 1.19 | 0.5  | 0.07 |
| B-B-A-B-D | R-Br | Cl   | I  | Et <sub>2</sub> NH | DMF/H <sub>2</sub> O | Et <sub>2</sub> NH·HBr | 0.38 | 1.66 | 0.63 | 0.44 | 0.47 | 1.18 | 0.56 | 0.46 | 0.55 | 1.56 | 0.86 | 0.43 |
| B-B-A-B-E | R-Br | Cl   | I  | Et <sub>2</sub> NH | NMP/H <sub>2</sub> O | Et <sub>2</sub> NH·HBr | 0.24 | 1.37 | 0.33 | 0.14 | 0.3  | 0.89 | 0.26 | 0.16 | 0.45 | 1.26 | 0.57 | 0.13 |
| B-B-B-A-A | R-Br | Cl   | Br | Et <sub>3</sub> N  | DMF                  | Et <sub>3</sub> N·HBr  | 0.76 | 1.36 | 1.03 | 0.84 | 0.81 | 1.17 | 0.95 | 0.84 | 1.14 | 1.1  | 1.25 | 0.82 |
| B-B-B-A-B | R-Br | Cl   | Br | Et <sub>3</sub> N  | NMP                  | Et <sub>3</sub> N·HBr  | 0.57 | 0.77 | 0.44 | 0.25 | 0.62 | 0.57 | 0.36 | 0.25 | 1.31 | 0.5  | 0.65 | 0.22 |
| B-B-B-A-C | R-Br | Cl   | Br | Et <sub>3</sub> N  | H <sub>2</sub> O     | Et <sub>3</sub> N·HBr  | 0.48 | 0.64 | 0.31 | 0.11 | 0.5  | 0.44 | 0.22 | 0.12 | 1.42 | 0.37 | 0.52 | 0.09 |
| B-B-B-A-D | R-Br | Cl   | Br | Et <sub>3</sub> N  | DMF/H <sub>2</sub> O | Et <sub>3</sub> N·HBr  | 0.67 | 1    | 0.67 | 0.48 | 0.73 | 0.8  | 0.59 | 0.48 | 1.21 | 0.73 | 0.88 | 0.45 |
| B-B-B-A-E | R-Br | Cl   | Br | Et <sub>3</sub> N  | NMP/H <sub>2</sub> O | Et <sub>3</sub> N·HBr  | 0.53 | 0.7  | 0.37 | 0.18 | 0.57 | 0.51 | 0.29 | 0.18 | 1.35 | 0.43 | 0.59 | 0.16 |
| B-B-B-B-A | R-Br | Cl   | Br | Et <sub>2</sub> NH | DMF                  | Et <sub>2</sub> NH·HBr | 0.5  | 2.06 | 1.02 | 0.83 | 0.6  | 1.58 | 0.95 | 0.85 | 0.64 | 1.96 | 1.26 | 0.83 |
| B-B-B-B-B | R-Br | Cl   | Br | Et <sub>2</sub> NH | NMP                  | Et <sub>2</sub> NH·HBr | 0.29 | 1.46 | 0.43 | 0.23 | 0.37 | 0.98 | 0.36 | 0.25 | 0.49 | 1.36 | 0.67 | 0.24 |
| B-B-B-B-C | R-Br | Cl   | Br | Et <sub>2</sub> NH | H <sub>2</sub> O     | Et <sub>2</sub> NH·HBr | 0.22 | 1.33 | 0.3  | 0.1  | 0.27 | 0.85 | 0.23 | 0.12 | 0.43 | 1.23 | 0.53 | 0.1  |
| B-B-B-B-D | R-Br | Cl   | Br | Et <sub>2</sub> NH | DMF/H <sub>2</sub> O | Et <sub>2</sub> NH·HBr | 0.39 | 1.69 | 0.66 | 0.46 | 0.49 | 1.21 | 0.59 | 0.48 | 0.56 | 1.59 | 0.9  | 0.47 |
| B-B-B-B-E | R-Br | Cl   | Br | Et <sub>2</sub> NH | NMP/H <sub>2</sub> O | Et <sub>2</sub> NH·HBr | 0.26 | 1.4  | 0.36 | 0.17 | 0.32 | 0.92 | 0.29 | 0.19 | 0.46 | 1.3  | 0.6  | 0.17 |
| B-C-A-A-A | R-Br | acac | I  | Et <sub>3</sub> N  | DMF                  | Et <sub>3</sub> N·HBr  | 0.79 | 1.59 | 1.26 | 1.07 | 0.91 | 2.54 | 2.32 | 2.22 | 1.09 | 1.76 | 1.91 | 1.48 |
| B-C-A-A-B | R-Br | acac | I  | Et <sub>3</sub> N  | NMP                  | Et <sub>3</sub> N·HBr  | 0.67 | 1    | 0.67 | 0.47 | 0.89 | 1.95 | 1.73 | 1.62 | 1.13 | 1.17 | 1.32 | 0.89 |
| B-C-A-A-C | R-Br | acac | I  | Et <sub>3</sub> N  | H <sub>2</sub> O     | Et <sub>3</sub> N·HBr  | 0.62 | 0.86 | 0.53 | 0.34 | 0.88 | 1.81 | 1.6  | 1.49 | 1.15 | 1.03 | 1.19 | 0.75 |
| B-C-A-A-D | R-Br | acac | I  | Et <sub>3</sub> N  | DMF/H <sub>2</sub> O | Et <sub>3</sub> N·HBr  | 0.73 | 1.23 | 0.9  | 0.7  | 0.9  | 2.18 | 1.96 | 1.85 | 1.11 | 1.4  | 1.55 | 1.12 |
| B-C-A-A-E | R-Br | acac | I  | Et <sub>3</sub> N  | NMP/H <sub>2</sub> O | Et <sub>3</sub> N·HBr  | 0.64 | 0.93 | 0.6  | 0.4  | 0.88 | 1.88 | 1.66 | 1.56 | 1.14 | 1.1  | 1.25 | 0.82 |
| B-C-A-B-A | R-Br | acac | I  | Et <sub>2</sub> NH | DMF                  | Et <sub>2</sub> NH·HBr | 0.55 | 2.28 | 1.25 | 1.05 | 0.79 | 2.95 | 2.33 | 2.22 | 0.73 | 2.62 | 1.93 | 1.5  |
| B-C-A-B-B | R-Br | acac | I  | Et <sub>2</sub> NH | NMP                  | Et <sub>2</sub> NH·HBr | 0.39 | 1.69 | 0.66 | 0.46 | 0.74 | 2.36 | 1.73 | 1.63 | 0.66 | 2.03 | 1.33 | 0.9  |
| B-C-A-B-C | R-Br | acac | I  | Et <sub>2</sub> NH | H <sub>2</sub> O     | Et <sub>2</sub> NH·HBr | 0.34 | 1.55 | 0.52 | 0.33 | 0.72 | 2.22 | 1.6  | 1.5  | 0.63 | 1.9  | 1.2  | 0.77 |
| B-C-A-B-D | R-Br | acac | I  | Et <sub>2</sub> NH | DMF/H <sub>2</sub> O | Et <sub>2</sub> NH·HBr | 0.46 | 1.92 | 0.89 | 0.69 | 0.76 | 2.59 | 1.96 | 1.86 | 0.69 | 2.26 | 1.56 | 1.13 |
| B-C-A-B-E | R-Br | acac | I  | Et <sub>2</sub> NH | NMP/H <sub>2</sub> O | Et <sub>2</sub> NH·HBr | 0.36 | 1.62 | 0.59 | 0.39 | 0.73 | 2.29 | 1.67 | 1.56 | 0.65 | 1.96 | 1.27 | 0.84 |
| B-C-B-A-A | R-Br | acac | Br | Et <sub>3</sub> N  | DMF                  | Et <sub>3</sub> N·HBr  | 0.8  | 1.62 | 1.29 | 1.1  | 0.91 | 2.57 | 2.35 | 2.25 | 1.09 | 1.8  | 1.95 | 1.52 |
| B-C-B-A-B | R-Br | acac | Br | Et <sub>3</sub> N  | NMP                  | Et <sub>3</sub> N·HBr  | 0.68 | 1.03 | 0.7  | 0.5  | 0.89 | 1.98 | 1.76 | 1.65 | 1.13 | 1.2  | 1.36 | 0.92 |
| B-C-B-A-C | R-Br | acac | Br | Et <sub>3</sub> N  | H <sub>2</sub> O     | Et <sub>3</sub> N·HBr  | 0.63 | 0.89 | 0.56 | 0.37 | 0.88 | 1.84 | 1.62 | 1.52 | 1.14 | 1.07 | 1.22 | 0.79 |
| B-C-B-A-D | R-Br | acac | Br | Et <sub>3</sub> N  | DMF/H <sub>2</sub> O | Et <sub>3</sub> N·HBr  | 0.74 | 1.26 | 0.93 | 0.73 | 0.9  | 2.21 | 1.99 | 1.88 | 1.11 | 1.43 | 1.59 | 1.15 |
| B-C-B-A-E | R-Br | acac | Br | Et <sub>3</sub> N  | NMP/H <sub>2</sub> O | Et <sub>3</sub> N·HBr  | 0.66 | 0.96 | 0.63 | 0.43 | 0.89 | 1.91 | 1.69 | 1.59 | 1.14 | 1.13 | 1.29 | 0.86 |
| B-C-B-B-A | R-Br | acac | Br | Et <sub>2</sub> NH | DMF                  | Et <sub>2</sub> NH·HBr | 0.55 | 2.31 | 1.28 | 1.08 | 0.79 | 2.98 | 2.36 | 2.25 | 0.74 | 2.66 | 1.96 | 1.53 |
| B-C-B-B-B | R-Br | acac | Br | Et <sub>2</sub> NH | NMP                  | Et <sub>2</sub> NH·HBr | 0.4  | 1.72 | 0.68 | 0.49 | 0.74 | 2.39 | 1.76 | 1.66 | 0.66 | 2.06 | 1.37 | 0.94 |
| B-C-B-B-C | R-Br | acac | Br | Et <sub>2</sub> NH | H <sub>2</sub> O     | Et <sub>2</sub> NH·HBr | 0.35 | 1.58 | 0.55 | 0.36 | 0.72 | 2.25 | 1.63 | 1.52 | 0.64 | 1.93 | 1.24 | 0.8  |
| B-C-B-B-D | R-Br | acac | Br | Et <sub>2</sub> NH | DMF/H <sub>2</sub> O | Et <sub>2</sub> NH·HBr | 0.47 | 1.95 | 0.92 | 0.72 | 0.76 | 2.62 | 1.99 | 1.89 | 0.7  | 2.29 | 1.6  | 1.17 |
| B-C-B-B-E | R-Br | acac | Br | Et <sub>2</sub> NH | NMP/H <sub>2</sub> O | Et <sub>2</sub> NH·HBr | 0.37 | 1.65 | 0.62 | 0.42 | 0.73 | 2.32 | 1.7  | 1.59 | 0.65 | 2    | 1.3  | 0.87 |

Target product P (1-((4-methoxyphenyl)ethynyl)-3-nitrobenzene) and starting material SM1 (1-ethynyl-3-nitrobenzene) are not shown. R-I, 1-iodo-4-methoxybenzene; R-Br, 1-bromo-4-methoxybenzene; DMF, dimethylformamide; NMP, *N*-methylpyrrolidone; BF, bio-Factor; CP<sub>i</sub>, initial cytotoxicity potential; CP<sub>f</sub>, final cytotoxicity potential; CP<sub>f,rel</sub>, relative final cytotoxicity potential. The reactions with the five lowest CPs are highlighted with green. Organic solvents mixed with water at a 1:1 mass ratio are indicated as solvent/H<sub>2</sub>O.

**Table S7.** bio-Factors and cytotoxicity potentials for synthesis of (*E*)-stilbene.

| Reaction | Starting materials (SM2) | Catalyst (CT) PdA <sub>2</sub> | Reagent (R)        | Solvent (S) | Byproduct (BP)         | CaCo-2 |                 |                 |                     | FRSN |                 |                 |                     | HEK293T |                 |                 |                     |
|----------|--------------------------|--------------------------------|--------------------|-------------|------------------------|--------|-----------------|-----------------|---------------------|------|-----------------|-----------------|---------------------|---------|-----------------|-----------------|---------------------|
|          |                          |                                |                    |             |                        | BF     | CP <sub>i</sub> | CP <sub>f</sub> | CP <sub>f,rel</sub> | BF   | CP <sub>i</sub> | CP <sub>f</sub> | CP <sub>f,rel</sub> | BF      | CP <sub>i</sub> | CP <sub>f</sub> | CP <sub>f,rel</sub> |
| A-A-A-A  | PhI                      | OAc                            | Et <sub>3</sub> N  | DMF         | Et <sub>3</sub> N·HI   | 0.7    | 1.18            | 0.82            | 0.8                 | 0.71 | 1.16            | 0.82            | 0.79                | 0.66    | 0.35            | 0.23            | 0.21                |
| A-A-A-B  | PhI                      | OAc                            | Et <sub>3</sub> N  | NMP         | Et <sub>3</sub> N·HI   | 0.39   | 0.58            | 0.23            | 0.21                | 0.41 | 0.58            | 0.24            | 0.21                | 0.57    | 0.27            | 0.15            | 0.13                |
| A-A-B-A  | PhI                      | OAc                            | Et <sub>2</sub> NH | DMF         | Et <sub>2</sub> NH·HI  | 0.46   | 1.87            | 0.87            | 0.85                | 0.52 | 1.57            | 0.82            | 0.79                | 0.18    | 1.21            | 0.22            | 0.21                |
| A-A-B-B  | PhI                      | OAc                            | Et <sub>2</sub> NH | NMP         | Et <sub>2</sub> NH·HI  | 0.21   | 1.27            | 0.27            | 0.25                | 0.24 | 0.99            | 0.24            | 0.2                 | 0.13    | 1.13            | 0.15            | 0.13                |
| A-B-A-A  | PhI                      | Cl                             | Et <sub>3</sub> N  | DMF         | Et <sub>3</sub> N·HI   | 0.7    | 1.18            | 0.83            | 0.81                | 0.71 | 1.17            | 0.83            | 0.8                 | 0.67    | 0.35            | 0.23            | 0.22                |
| A-B-A-B  | PhI                      | Cl                             | Et <sub>3</sub> N  | NMP         | Et <sub>3</sub> N·HI   | 0.39   | 0.59            | 0.23            | 0.21                | 0.42 | 0.59            | 0.25            | 0.22                | 0.57    | 0.27            | 0.16            | 0.14                |
| A-B-B-A  | PhI                      | Cl                             | Et <sub>2</sub> NH | DMF         | Et <sub>2</sub> NH·HI  | 0.46   | 1.87            | 0.87            | 0.85                | 0.53 | 1.58            | 0.83            | 0.8                 | 0.19    | 1.21            | 0.23            | 0.21                |
| A-B-B-B  | PhI                      | Cl                             | Et <sub>2</sub> NH | NMP         | Et <sub>2</sub> NH·HI  | 0.22   | 1.28            | 0.28            | 0.26                | 0.25 | 1               | 0.25            | 0.22                | 0.13    | 1.14            | 0.15            | 0.13                |
| A-C-A-A  | PhI                      | acac                           | Et <sub>3</sub> N  | DMF         | Et <sub>3</sub> N·HI   | 0.75   | 1.44            | 1.08            | 1.06                | 0.87 | 2.57            | 2.24            | 2.21                | 0.89    | 1.05            | 0.94            | 0.92                |
| A-C-A-B  | PhI                      | acac                           | Et <sub>3</sub> N  | NMP         | Et <sub>3</sub> N·HI   | 0.58   | 0.84            | 0.49            | 0.47                | 0.83 | 1.99            | 1.65            | 1.62                | 0.88    | 0.97            | 0.86            | 0.84                |
| A-C-B-A  | PhI                      | acac                           | Et <sub>2</sub> NH | DMF         | Et <sub>2</sub> NH·HI  | 0.53   | 2.13            | 1.13            | 1.11                | 0.75 | 2.98            | 2.23            | 2.2                 | 0.49    | 1.91            | 0.93            | 0.91                |
| A-C-B-B  | PhI                      | acac                           | Et <sub>2</sub> NH | NMP         | Et <sub>2</sub> NH·HI  | 0.35   | 1.53            | 0.53            | 0.52                | 0.69 | 2.4             | 1.65            | 1.62                | 0.46    | 1.84            | 0.85            | 0.83                |
| B-A-A-A  | PhBr                     | OAc                            | Et <sub>3</sub> N  | DMF         | Et <sub>3</sub> N·HBr  | 0.76   | 1.06            | 0.8             | 0.78                | 0.77 | 1.07            | 0.82            | 0.79                | 0.76    | 0.3             | 0.23            | 0.21                |
| B-A-A-B  | PhBr                     | OAc                            | Et <sub>3</sub> N  | NMP         | Et <sub>3</sub> N·HBr  | 0.45   | 0.46            | 0.21            | 0.19                | 0.49 | 0.48            | 0.24            | 0.21                | 0.67    | 0.22            | 0.15            | 0.13                |
| B-A-B-A  | PhBr                     | OAc                            | Et <sub>2</sub> NH | DMF         | Et <sub>2</sub> NH·HBr | 0.45   | 1.75            | 0.79            | 0.77                | 0.56 | 1.48            | 0.83            | 0.8                 | 0.21    | 1.16            | 0.24            | 0.22                |
| B-A-B-B  | PhBr                     | OAc                            | Et <sub>2</sub> NH | NMP         | Et <sub>2</sub> NH·HBr | 0.17   | 1.16            | 0.2             | 0.18                | 0.27 | 0.89            | 0.24            | 0.21                | 0.15    | 1.08            | 0.16            | 0.14                |
| B-B-A-A  | PhBr                     | Cl                             | Et <sub>3</sub> N  | DMF         | Et <sub>3</sub> N·HBr  | 0.76   | 1.06            | 0.81            | 0.79                | 0.77 | 1.08            | 0.83            | 0.8                 | 0.76    | 0.3             | 0.23            | 0.21                |
| B-B-A-B  | PhBr                     | Cl                             | Et <sub>3</sub> N  | NMP         | Et <sub>3</sub> N·HBr  | 0.45   | 0.47            | 0.21            | 0.19                | 0.51 | 0.5             | 0.25            | 0.22                | 0.68    | 0.23            | 0.15            | 0.14                |
| B-B-B-A  | PhBr                     | Cl                             | Et <sub>2</sub> NH | DMF         | Et <sub>2</sub> NH·HBr | 0.45   | 1.75            | 0.8             | 0.78                | 0.56 | 1.49            | 0.84            | 0.81                | 0.21    | 1.17            | 0.24            | 0.23                |
| B-B-B-B  | PhBr                     | Cl                             | Et <sub>2</sub> NH | NMP         | Et <sub>2</sub> NH·HBr | 0.17   | 1.16            | 0.2             | 0.18                | 0.28 | 0.91            | 0.26            | 0.23                | 0.15    | 1.09            | 0.17            | 0.15                |
| B-C-A-A  | PhBr                     | acac                           | Et <sub>3</sub> N  | DMF         | Et <sub>3</sub> N·HBr  | 0.81   | 1.32            | 1.06            | 1.04                | 0.9  | 2.48            | 2.24            | 2.21                | 0.93    | 1               | 0.93            | 0.91                |
| B-C-A-B  | PhBr                     | acac                           | Et <sub>3</sub> N  | NMP         | Et <sub>3</sub> N·HBr  | 0.65   | 0.72            | 0.47            | 0.45                | 0.87 | 1.9             | 1.65            | 1.62                | 0.92    | 0.93            | 0.85            | 0.84                |
| B-C-B-A  | PhBr                     | acac                           | Et <sub>2</sub> NH | DMF         | Et <sub>2</sub> NH·HBr | 0.52   | 2.01            | 1.05            | 1.03                | 0.78 | 2.89            | 2.24            | 2.21                | 0.51    | 1.87            | 0.95            | 0.93                |
| B-C-B-B  | PhBr                     | acac                           | Et <sub>2</sub> NH | NMP         | Et <sub>2</sub> NH·HBr | 0.32   | 1.42            | 0.46            | 0.44                | 0.72 | 2.31            | 1.66            | 1.63                | 0.48    | 1.79            | 0.87            | 0.85                |
| C-A-A-A  | PhCl                     | OAc                            | Et <sub>3</sub> N  | DMF         | Et <sub>3</sub> N·HCl  | 0.82   | 1               | 0.82            | 0.8                 | 0.8  | 1.02            | 0.82            | 0.79                | 0.88    | 0.27            | 0.24            | 0.22                |
| C-A-A-B  | PhCl                     | OAc                            | Et <sub>3</sub> N  | NMP         | Et <sub>3</sub> N·HCl  | 0.55   | 0.4             | 0.22            | 0.21                | 0.53 | 0.44            | 0.23            | 0.2                 | 0.83    | 0.19            | 0.16            | 0.14                |
| C-A-B-A  | PhCl                     | OAc                            | Et <sub>2</sub> NH | DMF         | Et <sub>2</sub> NH·HCl | 0.5    | 1.69            | 0.84            | 0.82                | 0.57 | 1.43            | 0.81            | 0.78                | 0.2     | 1.13            | 0.22            | 0.21                |
| C-A-B-B  | PhCl                     | OAc                            | Et <sub>2</sub> NH | NMP         | Et <sub>2</sub> NH·HCl | 0.23   | 1.1             | 0.25            | 0.23                | 0.27 | 0.84            | 0.23            | 0.2                 | 0.14    | 1.05            | 0.15            | 0.13                |
| C-B-A-A  | PhCl                     | Cl                             | Et <sub>3</sub> N  | DMF         | Et <sub>3</sub> N·HCl  | 0.82   | 1               | 0.82            | 0.8                 | 0.8  | 1.03            | 0.83            | 0.8                 | 0.88    | 0.27            | 0.24            | 0.23                |
| C-B-A-B  | PhCl                     | Cl                             | Et <sub>3</sub> N  | NMP         | Et <sub>3</sub> N·HCl  | 0.56   | 0.41            | 0.23            | 0.21                | 0.55 | 0.45            | 0.24            | 0.21                | 0.84    | 0.2             | 0.16            | 0.15                |
| C-B-B-A  | PhCl                     | Cl                             | Et <sub>2</sub> NH | DMF         | Et <sub>2</sub> NH·HCl | 0.5    | 1.69            | 0.85            | 0.83                | 0.57 | 1.44            | 0.83            | 0.8                 | 0.2     | 1.14            | 0.23            | 0.21                |
| C-B-B-B  | PhCl                     | Cl                             | Et <sub>2</sub> NH | NMP         | Et <sub>2</sub> NH·HCl | 0.23   | 1.1             | 0.25            | 0.24                | 0.28 | 0.86            | 0.24            | 0.21                | 0.14    | 1.06            | 0.15            | 0.13                |
| C-C-A-A  | PhCl                     | acac                           | Et <sub>3</sub> N  | DMF         | Et <sub>3</sub> N·HCl  | 0.86   | 1.26            | 1.08            | 1.06                | 0.92 | 2.43            | 2.23            | 2.2                 | 0.97    | 0.97            | 0.94            | 0.93                |
| C-C-A-B  | PhCl                     | acac                           | Et <sub>3</sub> N  | NMP         | Et <sub>3</sub> N·HCl  | 0.73   | 0.67            | 0.48            | 0.47                | 0.89 | 1.85            | 1.65            | 1.62                | 0.96    | 0.9             | 0.87            | 0.85                |
| C-C-B-A  | PhCl                     | acac                           | Et <sub>2</sub> NH | DMF         | Et <sub>2</sub> NH·HCl | 0.57   | 1.95            | 1.1             | 1.09                | 0.78 | 2.84            | 2.23            | 2.2                 | 0.51    | 1.84            | 0.93            | 0.91                |
| C-C-B-B  | PhCl                     | acac                           | Et <sub>2</sub> NH | NMP         | Et <sub>2</sub> NH·HCl | 0.37   | 1.36            | 0.51            | 0.49                | 0.73 | 2.26            | 1.65            | 1.61                | 0.48    | 1.76            | 0.85            | 0.83                |

Target product P(*E*-stilbene) and starting material SM1 (styrene) are not shown. PhI, iodobenzene; PhBr, bromobenzene; PhCl, chlorobenzene; DMF, dimethylformamide; NMP, *N*-methylpyrrolidone; BF, bio-Factor; CP<sub>i</sub>, initial cytotoxicity potential; CP<sub>f</sub>, final cytotoxicity potential; CP<sub>f,rel</sub>, relative final cytotoxicity potential. The reactions with the five lowest CPs are highlighted with green.

**Table S8.** bio-Factors and cytotoxicity potentials for synthesis of (*E*)-4-nitrostilbene.

| Reaction | Starting materials (SM2) | Catalyst (CT) PdA <sub>2</sub> | Reagent (R)        | Solvent (S) | Byproduct (BP)         | CaCo-2 |                 |                 |                     | FRSN |                 |                 |                     | HEK293T |                 |                 |                     |
|----------|--------------------------|--------------------------------|--------------------|-------------|------------------------|--------|-----------------|-----------------|---------------------|------|-----------------|-----------------|---------------------|---------|-----------------|-----------------|---------------------|
|          |                          |                                |                    |             |                        | BF     | CP <sub>i</sub> | CP <sub>f</sub> | CP <sub>f,rel</sub> | BF   | CP <sub>i</sub> | CP <sub>f</sub> | CP <sub>f,rel</sub> | BF      | CP <sub>i</sub> | CP <sub>f</sub> | CP <sub>f,rel</sub> |
| A-A-A-A  | R-I                      | OAc                            | Et <sub>3</sub> N  | DMF         | Et <sub>3</sub> N·HI   | 0.97   | 0.93            | 0.9             | 0.8                 | 0.92 | 0.91            | 0.84            | 0.79                | 1.2     | 0.27            | 0.32            | 0.21                |
| A-A-A-B  | R-I                      | OAc                            | Et <sub>3</sub> N  | NMP         | Et <sub>3</sub> N·HI   | 0.93   | 0.33            | 0.31            | 0.21                | 0.77 | 0.33            | 0.25            | 0.21                | 1.28    | 0.19            | 0.25            | 0.13                |
| A-A-B-A  | R-I                      | OAc                            | Et <sub>2</sub> NH | DMF         | Et <sub>2</sub> NH·HI  | 0.59   | 1.62            | 0.95            | 0.85                | 0.63 | 1.32            | 0.83            | 0.79                | 0.28    | 1.13            | 0.32            | 0.21                |
| A-A-B-B  | R-I                      | OAc                            | Et <sub>2</sub> NH | NMP         | Et <sub>2</sub> NH·HI  | 0.35   | 1.03            | 0.35            | 0.25                | 0.34 | 0.74            | 0.25            | 0.2                 | 0.23    | 1.06            | 0.24            | 0.13                |
| A-B-A-A  | R-I                      | Cl                             | Et <sub>3</sub> N  | DMF         | Et <sub>3</sub> N·HI   | 0.97   | 0.93            | 0.91            | 0.81                | 0.92 | 0.92            | 0.85            | 0.8                 | 1.19    | 0.28            | 0.33            | 0.22                |
| A-B-A-B  | R-I                      | Cl                             | Et <sub>3</sub> N  | NMP         | Et <sub>3</sub> N·HI   | 0.93   | 0.34            | 0.31            | 0.21                | 0.78 | 0.34            | 0.26            | 0.22                | 1.27    | 0.2             | 0.25            | 0.14                |
| A-B-B-A  | R-I                      | Cl                             | Et <sub>2</sub> NH | DMF         | Et <sub>2</sub> NH·HI  | 0.59   | 1.62            | 0.95            | 0.85                | 0.64 | 1.33            | 0.85            | 0.8                 | 0.28    | 1.14            | 0.32            | 0.21                |
| A-B-B-B  | R-I                      | Cl                             | Et <sub>2</sub> NH | NMP         | Et <sub>2</sub> NH·HI  | 0.35   | 1.03            | 0.36            | 0.26                | 0.35 | 0.75            | 0.26            | 0.22                | 0.23    | 1.06            | 0.24            | 0.13                |
| A-C-A-A  | R-I                      | acac                           | Et <sub>3</sub> N  | DMF         | Et <sub>3</sub> N·HI   | 0.98   | 1.19            | 1.16            | 1.06                | 0.97 | 2.32            | 2.25            | 2.21                | 1.05    | 0.98            | 1.03            | 0.92                |
| A-C-A-B  | R-I                      | acac                           | Et <sub>3</sub> N  | NMP         | Et <sub>3</sub> N·HI   | 0.96   | 0.59            | 0.57            | 0.47                | 0.96 | 1.74            | 1.67            | 1.62                | 1.06    | 0.9             | 0.95            | 0.84                |
| A-C-B-A  | R-I                      | acac                           | Et <sub>2</sub> NH | DMF         | Et <sub>2</sub> NH·HI  | 0.64   | 1.88            | 1.21            | 1.11                | 0.82 | 2.73            | 2.25            | 2.2                 | 0.56    | 1.84            | 1.02            | 0.91                |
| A-C-B-B  | R-I                      | acac                           | Et <sub>2</sub> NH | NMP         | Et <sub>2</sub> NH·HI  | 0.48   | 1.28            | 0.61            | 0.51                | 0.77 | 2.15            | 1.66            | 1.62                | 0.54    | 1.76            | 0.94            | 0.83                |
| B-A-A-A  | R-Br                     | OAc                            | Et <sub>3</sub> N  | DMF         | Et <sub>3</sub> N·HBr  | 0.64   | 1.38            | 0.88            | 0.78                | 0.87 | 0.96            | 0.84            | 0.79                | 0.65    | 0.49            | 0.32            | 0.21                |
| B-A-A-B  | R-Br                     | OAc                            | Et <sub>3</sub> N  | NMP         | Et <sub>3</sub> N·HBr  | 0.37   | 0.78            | 0.29            | 0.19                | 0.67 | 0.38            | 0.25            | 0.21                | 0.58    | 0.41            | 0.24            | 0.13                |
| B-A-B-A  | R-Br                     | OAc                            | Et <sub>2</sub> NH | DMF         | Et <sub>2</sub> NH·HBr | 0.42   | 2.07            | 0.87            | 0.77                | 0.62 | 1.37            | 0.84            | 0.8                 | 0.25    | 1.35            | 0.33            | 0.22                |
| B-A-B-B  | R-Br                     | OAc                            | Et <sub>2</sub> NH | NMP         | Et <sub>2</sub> NH·HBr | 0.19   | 1.48            | 0.28            | 0.18                | 0.33 | 0.79            | 0.26            | 0.21                | 0.2     | 1.28            | 0.26            | 0.14                |
| B-B-A-A  | R-Br                     | Cl                             | Et <sub>3</sub> N  | DMF         | Et <sub>3</sub> N·HBr  | 0.64   | 1.38            | 0.89            | 0.79                | 0.87 | 0.97            | 0.85            | 0.8                 | 0.65    | 0.5             | 0.32            | 0.21                |
| B-B-A-B  | R-Br                     | Cl                             | Et <sub>3</sub> N  | NMP         | Et <sub>3</sub> N·HBr  | 0.37   | 0.79            | 0.29            | 0.19                | 0.68 | 0.39            | 0.27            | 0.22                | 0.59    | 0.42            | 0.25            | 0.14                |
| B-B-B-A  | R-Br                     | Cl                             | Et <sub>2</sub> NH | DMF         | Et <sub>2</sub> NH·HBr | 0.42   | 2.07            | 0.88            | 0.78                | 0.62 | 1.38            | 0.85            | 0.81                | 0.25    | 1.36            | 0.34            | 0.23                |
| B-B-B-B  | R-Br                     | Cl                             | Et <sub>2</sub> NH | NMP         | Et <sub>2</sub> NH·HBr | 0.19   | 1.48            | 0.28            | 0.18                | 0.34 | 0.8             | 0.27            | 0.23                | 0.2     | 1.28            | 0.26            | 0.15                |
| B-C-A-A  | R-Br                     | acac                           | Et <sub>3</sub> N  | DMF         | Et <sub>3</sub> N·HBr  | 0.7    | 1.64            | 1.14            | 1.04                | 0.95 | 2.37            | 2.25            | 2.21                | 0.86    | 1.2             | 1.03            | 0.91                |
| B-C-A-B  | R-Br                     | acac                           | Et <sub>3</sub> N  | NMP         | Et <sub>3</sub> N·HBr  | 0.53   | 1.04            | 0.55            | 0.45                | 0.93 | 1.79            | 1.67            | 1.62                | 0.85    | 1.12            | 0.95            | 0.84                |
| B-C-B-A  | R-Br                     | acac                           | Et <sub>2</sub> NH | DMF         | Et <sub>2</sub> NH·HBr | 0.49   | 2.33            | 1.13            | 1.03                | 0.81 | 2.78            | 2.26            | 2.21                | 0.5     | 2.06            | 1.04            | 0.93                |
| B-C-B-B  | R-Br                     | acac                           | Et <sub>2</sub> NH | NMP         | Et <sub>2</sub> NH·HBr | 0.31   | 1.73            | 0.54            | 0.44                | 0.76 | 2.2             | 1.67            | 1.63                | 0.48    | 1.98            | 0.96            | 0.85                |
| C-A-A-A  | R-Cl                     | OAc                            | Et <sub>3</sub> N  | DMF         | Et <sub>3</sub> N·HCl  | 0.96   | 0.94            | 0.9             | 0.8                 | 0.88 | 0.94            | 0.83            | 0.79                | 1.22    | 0.27            | 0.33            | 0.22                |
| C-A-A-B  | R-Cl                     | OAc                            | Et <sub>3</sub> N  | NMP         | Et <sub>3</sub> N·HCl  | 0.88   | 0.35            | 0.31            | 0.21                | 0.68 | 0.36            | 0.25            | 0.2                 | 1.31    | 0.19            | 0.25            | 0.14                |
| C-A-B-A  | R-Cl                     | OAc                            | Et <sub>2</sub> NH | DMF         | Et <sub>2</sub> NH·HCl | 0.57   | 1.63            | 0.92            | 0.82                | 0.61 | 1.35            | 0.83            | 0.78                | 0.28    | 1.14            | 0.32            | 0.21                |
| C-A-B-B  | R-Cl                     | OAc                            | Et <sub>2</sub> NH | NMP         | Et <sub>2</sub> NH·HCl | 0.32   | 1.04            | 0.33            | 0.23                | 0.32 | 0.77            | 0.25            | 0.2                 | 0.23    | 1.06            | 0.24            | 0.13                |
| C-B-A-A  | R-Cl                     | Cl                             | Et <sub>3</sub> N  | DMF         | Et <sub>3</sub> N·HCl  | 0.96   | 0.94            | 0.9             | 0.8                 | 0.88 | 0.96            | 0.84            | 0.8                 | 1.21    | 0.28            | 0.34            | 0.23                |
| C-B-A-B  | R-Cl                     | Cl                             | Et <sub>3</sub> N  | NMP         | Et <sub>3</sub> N·HCl  | 0.89   | 0.35            | 0.31            | 0.21                | 0.69 | 0.37            | 0.26            | 0.21                | 1.3     | 0.2             | 0.26            | 0.15                |
| C-B-B-A  | R-Cl                     | Cl                             | Et <sub>2</sub> NH | DMF         | Et <sub>2</sub> NH·HCl | 0.57   | 1.64            | 0.93            | 0.83                | 0.62 | 1.37            | 0.84            | 0.8                 | 0.28    | 1.14            | 0.32            | 0.21                |
| C-B-B-B  | R-Cl                     | Cl                             | Et <sub>2</sub> NH | NMP         | Et <sub>2</sub> NH·HCl | 0.32   | 1.04            | 0.34            | 0.24                | 0.33 | 0.78            | 0.26            | 0.21                | 0.23    | 1.06            | 0.25            | 0.13                |
| C-C-A-A  | R-Cl                     | acac                           | Et <sub>3</sub> N  | DMF         | Et <sub>3</sub> N·HCl  | 0.97   | 1.2             | 1.16            | 1.06                | 0.95 | 2.36            | 2.24            | 2.2                 | 1.06    | 0.98            | 1.04            | 0.93                |
| C-C-A-B  | R-Cl                     | acac                           | Et <sub>3</sub> N  | NMP         | Et <sub>3</sub> N·HCl  | 0.93   | 0.61            | 0.57            | 0.47                | 0.94 | 1.78            | 1.66            | 1.62                | 1.07    | 0.9             | 0.96            | 0.85                |
| C-C-B-A  | R-Cl                     | acac                           | Et <sub>2</sub> NH | DMF         | Et <sub>2</sub> NH·HCl | 0.63   | 1.89            | 1.18            | 1.08                | 0.81 | 2.77            | 2.24            | 2.2                 | 0.56    | 1.84            | 1.02            | 0.91                |
| C-C-B-B  | R-Cl                     | acac                           | Et <sub>2</sub> NH | NMP         | Et <sub>2</sub> NH·HCl | 0.45   | 1.3             | 0.59            | 0.49                | 0.76 | 2.18            | 1.66            | 1.61                | 0.54    | 1.76            | 0.95            | 0.83                |

Target product P ((*E*)-4-nitrostilbene) and starting material SM1 (styrene) are not shown. R-I, 1-iodo-4-nitrobenzene; R-Br, 1-bromo-4-nitrobenzene; R-Cl, 1-chloro-4-nitrobenzene; DMF, dimethylformamide; NMP, *N*-methylpyrrolidone; BF, bio-Factor; CP<sub>i</sub>, initial cytotoxicity potential; CP<sub>f</sub>, final cytotoxicity potential; CP<sub>f,rel</sub>, relative final cytotoxicity potential. The reactions with the five lowest CPs are highlighted with green.

**Table S9.** bio-Factors and cytotoxicity potentials for synthesis of (*E*)-4-chlorostilbene.

| Reaction | Starting materials (SM2) | Catalyst (CT) PdA <sub>2</sub> | Reagent (R)        | Solvent (S) | Byproduct (BP)         | CaCo-2 |                 |                 |                     | FRSN |                 |                 |                     | HEK293T |                 |                 |                     |
|----------|--------------------------|--------------------------------|--------------------|-------------|------------------------|--------|-----------------|-----------------|---------------------|------|-----------------|-----------------|---------------------|---------|-----------------|-----------------|---------------------|
|          |                          |                                |                    |             |                        | BF     | CP <sub>i</sub> | CP <sub>f</sub> | CP <sub>f,rel</sub> | BF   | CP <sub>i</sub> | CP <sub>f</sub> | CP <sub>f,rel</sub> | BF      | CP <sub>i</sub> | CP <sub>f</sub> | CP <sub>f,rel</sub> |
| A-A-A-A  | PhI                      | OAc                            | Et <sub>3</sub> N  | DMF         | Et <sub>3</sub> N·HI   | 0.73   | 1.34            | 0.98            | 0.8                 | 0.77 | 1.58            | 1.22            | 0.79                | 0.81    | 0.41            | 0.33            | 0.21                |
| A-A-A-B  | PhI                      | OAc                            | Et <sub>3</sub> N  | NMP         | Et <sub>3</sub> N·HI   | 0.52   | 0.74            | 0.39            | 0.21                | 0.64 | 1               | 0.64            | 0.21                | 0.77    | 0.33            | 0.25            | 0.13                |
| A-A-B-A  | PhI                      | OAc                            | Et <sub>2</sub> NH | DMF         | Et <sub>2</sub> NH·HI  | 0.51   | 2.03            | 1.03            | 0.85                | 0.61 | 1.99            | 1.22            | 0.79                | 0.26    | 1.27            | 0.33            | 0.21                |
| A-A-B-B  | PhI                      | OAc                            | Et <sub>2</sub> NH | NMP         | Et <sub>2</sub> NH·HI  | 0.3    | 1.44            | 0.43            | 0.25                | 0.45 | 1.41            | 0.63            | 0.2                 | 0.21    | 1.19            | 0.25            | 0.13                |
| A-B-A-A  | PhI                      | Cl                             | Et <sub>3</sub> N  | DMF         | Et <sub>3</sub> N·HI   | 0.73   | 1.34            | 0.99            | 0.81                | 0.77 | 1.59            | 1.23            | 0.8                 | 0.81    | 0.41            | 0.34            | 0.22                |
| A-B-A-B  | PhI                      | Cl                             | Et <sub>3</sub> N  | NMP         | Et <sub>3</sub> N·HI   | 0.52   | 0.75            | 0.39            | 0.21                | 0.64 | 1.01            | 0.65            | 0.22                | 0.77    | 0.34            | 0.26            | 0.14                |
| A-B-B-A  | PhI                      | Cl                             | Et <sub>2</sub> NH | DMF         | Et <sub>2</sub> NH·HI  | 0.51   | 2.03            | 1.03            | 0.85                | 0.61 | 2               | 1.23            | 0.8                 | 0.26    | 1.28            | 0.33            | 0.21                |
| A-B-B-B  | PhI                      | Cl                             | Et <sub>2</sub> NH | NMP         | Et <sub>2</sub> NH·HI  | 0.3    | 1.44            | 0.44            | 0.26                | 0.45 | 1.42            | 0.64            | 0.22                | 0.21    | 1.2             | 0.25            | 0.13                |
| A-C-A-A  | PhI                      | acac                           | Et <sub>3</sub> N  | DMF         | Et <sub>3</sub> N·HI   | 0.78   | 1.6             | 1.24            | 1.06                | 0.88 | 2.99            | 2.63            | 2.21                | 0.93    | 1.11            | 1.04            | 0.92                |
| A-C-A-B  | PhI                      | acac                           | Et <sub>3</sub> N  | NMP         | Et <sub>3</sub> N·HI   | 0.64   | 1               | 0.65            | 0.47                | 0.85 | 2.41            | 2.05            | 1.62                | 0.93    | 1.04            | 0.96            | 0.84                |
| A-C-B-A  | PhI                      | acac                           | Et <sub>2</sub> NH | DMF         | Et <sub>2</sub> NH·HI  | 0.56   | 2.29            | 1.29            | 1.11                | 0.77 | 3.4             | 2.63            | 2.2                 | 0.52    | 1.98            | 1.03            | 0.91                |
| A-C-B-B  | PhI                      | acac                           | Et <sub>2</sub> NH | NMP         | Et <sub>2</sub> NH·HI  | 0.41   | 1.7             | 0.69            | 0.52                | 0.73 | 2.82            | 2.05            | 1.62                | 0.5     | 1.9             | 0.95            | 0.83                |
| B-A-A-A  | PhBr                     | OAc                            | Et <sub>3</sub> N  | DMF         | Et <sub>3</sub> N·HBr  | 0.79   | 1.22            | 0.96            | 0.78                | 0.82 | 1.49            | 1.22            | 0.79                | 0.91    | 0.36            | 0.33            | 0.21                |
| B-A-A-B  | PhBr                     | OAc                            | Et <sub>3</sub> N  | NMP         | Et <sub>3</sub> N·HBr  | 0.59   | 0.63            | 0.37            | 0.19                | 0.7  | 0.9             | 0.64            | 0.21                | 0.88    | 0.28            | 0.25            | 0.13                |
| B-A-B-A  | PhBr                     | OAc                            | Et <sub>2</sub> NH | DMF         | Et <sub>2</sub> NH·HBr | 0.5    | 1.91            | 0.95            | 0.77                | 0.65 | 1.9             | 1.23            | 0.8                 | 0.28    | 1.22            | 0.34            | 0.22                |
| B-A-B-B  | PhBr                     | OAc                            | Et <sub>2</sub> NH | NMP         | Et <sub>2</sub> NH·HBr | 0.27   | 1.32            | 0.36            | 0.18                | 0.49 | 1.31            | 0.64            | 0.21                | 0.23    | 1.15            | 0.26            | 0.14                |
| B-B-A-A  | PhBr                     | Cl                             | Et <sub>3</sub> N  | DMF         | Et <sub>3</sub> N·HBr  | 0.79   | 1.22            | 0.97            | 0.79                | 0.82 | 1.5             | 1.23            | 0.8                 | 0.91    | 0.37            | 0.33            | 0.21                |
| B-B-A-B  | PhBr                     | Cl                             | Et <sub>3</sub> N  | NMP         | Et <sub>3</sub> N·HBr  | 0.59   | 0.63            | 0.37            | 0.19                | 0.71 | 0.92            | 0.65            | 0.22                | 0.89    | 0.29            | 0.25            | 0.14                |
| B-B-B-A  | PhBr                     | Cl                             | Et <sub>2</sub> NH | DMF         | Et <sub>2</sub> NH·HBr | 0.5    | 1.92            | 0.96            | 0.78                | 0.65 | 1.91            | 1.24            | 0.81                | 0.28    | 1.23            | 0.35            | 0.23                |
| B-B-B-B  | PhBr                     | Cl                             | Et <sub>2</sub> NH | NMP         | Et <sub>2</sub> NH·HBr | 0.27   | 1.32            | 0.36            | 0.18                | 0.49 | 1.33            | 0.65            | 0.23                | 0.23    | 1.15            | 0.27            | 0.15                |
| B-C-A-A  | PhBr                     | acac                           | Et <sub>3</sub> N  | DMF         | Et <sub>3</sub> N·HBr  | 0.83   | 1.48            | 1.22            | 1.04                | 0.91 | 2.9             | 2.64            | 2.21                | 0.97    | 1.07            | 1.03            | 0.91                |
| B-C-A-B  | PhBr                     | acac                           | Et <sub>3</sub> N  | NMP         | Et <sub>3</sub> N·HBr  | 0.71   | 0.89            | 0.63            | 0.45                | 0.88 | 2.32            | 2.05            | 1.62                | 0.97    | 0.99            | 0.96            | 0.84                |
| B-C-B-A  | PhBr                     | acac                           | Et <sub>2</sub> NH | DMF         | Et <sub>2</sub> NH·HBr | 0.56   | 2.17            | 1.21            | 1.03                | 0.8  | 3.31            | 2.64            | 2.21                | 0.54    | 1.93            | 1.05            | 0.93                |
| B-C-B-B  | PhBr                     | acac                           | Et <sub>2</sub> NH | NMP         | Et <sub>2</sub> NH·HBr | 0.39   | 1.58            | 0.62            | 0.44                | 0.75 | 2.73            | 2.06            | 1.63                | 0.52    | 1.85            | 0.97            | 0.85                |
| C-A-A-A  | PhCl                     | OAc                            | Et <sub>3</sub> N  | DMF         | Et <sub>3</sub> N·HCl  | 0.84   | 1.16            | 0.98            | 0.8                 | 0.84 | 1.44            | 1.21            | 0.79                | 1.03    | 0.33            | 0.34            | 0.22                |
| C-A-A-B  | PhCl                     | OAc                            | Et <sub>3</sub> N  | NMP         | Et <sub>3</sub> N·HCl  | 0.68   | 0.57            | 0.38            | 0.21                | 0.74 | 0.86            | 0.63            | 0.2                 | 1.03    | 0.25            | 0.26            | 0.14                |
| C-A-B-A  | PhCl                     | OAc                            | Et <sub>2</sub> NH | DMF         | Et <sub>2</sub> NH·HCl | 0.54   | 1.85            | 1               | 0.82                | 0.66 | 1.85            | 1.21            | 0.78                | 0.27    | 1.19            | 0.33            | 0.21                |
| C-A-B-B  | PhCl                     | OAc                            | Et <sub>2</sub> NH | NMP         | Et <sub>2</sub> NH·HCl | 0.32   | 1.26            | 0.41            | 0.23                | 0.5  | 1.26            | 0.63            | 0.2                 | 0.22    | 1.12            | 0.25            | 0.13                |
| C-B-A-A  | PhCl                     | Cl                             | Et <sub>3</sub> N  | DMF         | Et <sub>3</sub> N·HCl  | 0.84   | 1.16            | 0.98            | 0.8                 | 0.84 | 1.45            | 1.23            | 0.8                 | 1.02    | 0.34            | 0.34            | 0.23                |
| C-B-A-B  | PhCl                     | Cl                             | Et <sub>3</sub> N  | NMP         | Et <sub>3</sub> N·HCl  | 0.68   | 0.57            | 0.39            | 0.21                | 0.74 | 0.87            | 0.64            | 0.21                | 1.03    | 0.26            | 0.27            | 0.15                |
| C-B-B-A  | PhCl                     | Cl                             | Et <sub>2</sub> NH | DMF         | Et <sub>2</sub> NH·HCl | 0.54   | 1.86            | 1.01            | 0.83                | 0.66 | 1.86            | 1.22            | 0.8                 | 0.28    | 1.2             | 0.33            | 0.21                |
| C-B-B-B  | PhCl                     | Cl                             | Et <sub>2</sub> NH | NMP         | Et <sub>2</sub> NH·HCl | 0.33   | 1.26            | 0.41            | 0.24                | 0.5  | 1.28            | 0.64            | 0.21                | 0.23    | 1.12            | 0.25            | 0.13                |
| C-C-A-A  | PhCl                     | acac                           | Et <sub>3</sub> N  | DMF         | Et <sub>3</sub> N·HCl  | 0.87   | 1.42            | 1.24            | 1.06                | 0.92 | 2.85            | 2.63            | 2.2                 | 1.01    | 1.04            | 1.04            | 0.93                |
| C-C-A-B  | PhCl                     | acac                           | Et <sub>3</sub> N  | NMP         | Et <sub>3</sub> N·HCl  | 0.78   | 0.83            | 0.64            | 0.47                | 0.9  | 2.27            | 2.04            | 1.62                | 1.01    | 0.96            | 0.97            | 0.85                |
| C-C-B-A  | PhCl                     | acac                           | Et <sub>2</sub> NH | DMF         | Et <sub>2</sub> NH·HCl | 0.6    | 2.11            | 1.26            | 1.09                | 0.81 | 3.26            | 2.63            | 2.2                 | 0.54    | 1.9             | 1.03            | 0.91                |
| C-C-B-B  | PhCl                     | acac                           | Et <sub>2</sub> NH | NMP         | Et <sub>2</sub> NH·HCl | 0.44   | 1.52            | 0.67            | 0.49                | 0.76 | 2.68            | 2.04            | 1.61                | 0.52    | 1.82            | 0.95            | 0.83                |

Target product P(*E*)-4-chlorostilbene) and starting material SM1 (4-chlorostyrene) are not shown. PhI, iodobenzene; PhBr, bromobenzene; PhCl, chlorobenzene; DMF, dimethylformamide; NMP, *N*-methylpyrrolidone; BF, bio-Factor; CP<sub>i</sub>, initial cytotoxicity potential; CP<sub>f</sub>, final cytotoxicity potential; CP<sub>f,rel</sub>, relative final cytotoxicity potential. The reactions with the five lowest CPs are highlighted with green.

**Table S10.** bio-Factors and cytotoxicity potentials for synthesis of (*E*)-4-chloro-4'-nitrostilbene.

| Reaction | Starting materials (SM2) | Catalyst (CT) PdA <sub>2</sub> | Reagent (R)        | Solvent (S) | Byproduct (BP)         | CaCo-2 |                 |                 |                     | FRSN |                 |                 |                     | HEK293T |                 |                 |                     |
|----------|--------------------------|--------------------------------|--------------------|-------------|------------------------|--------|-----------------|-----------------|---------------------|------|-----------------|-----------------|---------------------|---------|-----------------|-----------------|---------------------|
|          |                          |                                |                    |             |                        | BF     | CP <sub>i</sub> | CP <sub>f</sub> | CP <sub>f,rel</sub> | BF   | CP <sub>i</sub> | CP <sub>f</sub> | CP <sub>f,rel</sub> | BF      | CP <sub>i</sub> | CP <sub>f</sub> | CP <sub>f,rel</sub> |
| A-A-A-A  | R-I                      | OAc                            | Et <sub>3</sub> N  | DMF         | Et <sub>3</sub> N·HI   | 0.89   | 1.09            | 0.97            | 0.8                 | 0.65 | 1.33            | 0.87            | 0.79                | 0.87    | 0.33            | 0.29            | 0.21                |
| A-A-A-B  | R-I                      | OAc                            | Et <sub>3</sub> N  | NMP         | Et <sub>3</sub> N·HI   | 0.76   | 0.5             | 0.38            | 0.21                | 0.38 | 0.75            | 0.28            | 0.21                | 0.83    | 0.25            | 0.21            | 0.13                |
| A-A-B-A  | R-I                      | OAc                            | Et <sub>2</sub> NH | DMF         | Et <sub>2</sub> NH·HI  | 0.57   | 1.78            | 1.02            | 0.85                | 0.5  | 1.74            | 0.87            | 0.79                | 0.24    | 1.19            | 0.28            | 0.21                |
| A-A-B-B  | R-I                      | OAc                            | Et <sub>2</sub> NH | NMP         | Et <sub>2</sub> NH·HI  | 0.36   | 1.19            | 0.42            | 0.25                | 0.24 | 1.16            | 0.28            | 0.2                 | 0.18    | 1.12            | 0.21            | 0.13                |
| A-B-A-A  | R-I                      | Cl                             | Et <sub>3</sub> N  | DMF         | Et <sub>3</sub> N·HI   | 0.89   | 1.09            | 0.98            | 0.81                | 0.66 | 1.34            | 0.88            | 0.8                 | 0.87    | 0.34            | 0.29            | 0.22                |
| A-B-A-B  | R-I                      | Cl                             | Et <sub>3</sub> N  | NMP         | Et <sub>3</sub> N·HI   | 0.76   | 0.5             | 0.38            | 0.21                | 0.39 | 0.76            | 0.3             | 0.22                | 0.84    | 0.26            | 0.22            | 0.14                |
| A-B-B-A  | R-I                      | Cl                             | Et <sub>2</sub> NH | DMF         | Et <sub>2</sub> NH·HI  | 0.57   | 1.79            | 1.02            | 0.85                | 0.5  | 1.75            | 0.88            | 0.8                 | 0.24    | 1.2             | 0.29            | 0.21                |
| A-B-B-B  | R-I                      | Cl                             | Et <sub>2</sub> NH | NMP         | Et <sub>2</sub> NH·HI  | 0.36   | 1.19            | 0.43            | 0.26                | 0.25 | 1.17            | 0.29            | 0.22                | 0.19    | 1.12            | 0.21            | 0.13                |
| A-C-A-A  | R-I                      | acac                           | Et <sub>3</sub> N  | DMF         | Et <sub>3</sub> N·HI   | 0.91   | 1.35            | 1.23            | 1.06                | 0.83 | 2.74            | 2.28            | 2.21                | 0.96    | 1.04            | 0.99            | 0.92                |
| A-C-A-B  | R-I                      | acac                           | Et <sub>3</sub> N  | NMP         | Et <sub>3</sub> N·HI   | 0.84   | 0.75            | 0.64            | 0.47                | 0.79 | 2.16            | 1.7             | 1.62                | 0.96    | 0.96            | 0.92            | 0.84                |
| A-C-B-A  | R-I                      | acac                           | Et <sub>2</sub> NH | DMF         | Et <sub>2</sub> NH·HI  | 0.62   | 2.04            | 1.27            | 1.11                | 0.72 | 3.15            | 2.28            | 2.2                 | 0.52    | 1.9             | 0.99            | 0.91                |
| A-C-B-B  | R-I                      | acac                           | Et <sub>2</sub> NH | NMP         | Et <sub>2</sub> NH·HI  | 0.47   | 1.45            | 0.68            | 0.51                | 0.66 | 2.57            | 1.7             | 1.62                | 0.5     | 1.82            | 0.91            | 0.83                |
| B-A-A-A  | R-Br                     | OAc                            | Et <sub>3</sub> N  | DMF         | Et <sub>3</sub> N·HBr  | 0.62   | 1.54            | 0.95            | 0.78                | 0.63 | 1.38            | 0.87            | 0.79                | 0.52    | 0.55            | 0.29            | 0.21                |
| B-A-A-B  | R-Br                     | OAc                            | Et <sub>3</sub> N  | NMP         | Et <sub>3</sub> N·HBr  | 0.38   | 0.95            | 0.36            | 0.19                | 0.36 | 0.8             | 0.29            | 0.21                | 0.44    | 0.48            | 0.21            | 0.13                |
| B-A-B-A  | R-Br                     | OAc                            | Et <sub>2</sub> NH | DMF         | Et <sub>2</sub> NH·HBr | 0.42   | 2.23            | 0.94            | 0.77                | 0.49 | 1.79            | 0.87            | 0.8                 | 0.21    | 1.42            | 0.3             | 0.22                |
| B-A-B-B  | R-Br                     | OAc                            | Et <sub>2</sub> NH | NMP         | Et <sub>2</sub> NH·HBr | 0.21   | 1.64            | 0.35            | 0.18                | 0.24 | 1.21            | 0.29            | 0.21                | 0.17    | 1.34            | 0.22            | 0.14                |
| B-B-A-A  | R-Br                     | Cl                             | Et <sub>3</sub> N  | DMF         | Et <sub>3</sub> N·HBr  | 0.62   | 1.54            | 0.96            | 0.79                | 0.63 | 1.39            | 0.88            | 0.8                 | 0.52    | 0.56            | 0.29            | 0.21                |
| B-B-A-B  | R-Br                     | Cl                             | Et <sub>3</sub> N  | NMP         | Et <sub>3</sub> N·HBr  | 0.38   | 0.95            | 0.36            | 0.19                | 0.37 | 0.81            | 0.3             | 0.22                | 0.44    | 0.48            | 0.21            | 0.14                |
| B-B-B-A  | R-Br                     | Cl                             | Et <sub>2</sub> NH | DMF         | Et <sub>2</sub> NH·HBr | 0.42   | 2.24            | 0.94            | 0.78                | 0.49 | 1.8             | 0.89            | 0.81                | 0.21    | 1.42            | 0.3             | 0.23                |
| B-B-B-B  | R-Br                     | Cl                             | Et <sub>2</sub> NH | NMP         | Et <sub>2</sub> NH·HBr | 0.21   | 1.64            | 0.35            | 0.18                | 0.25 | 1.22            | 0.3             | 0.23                | 0.17    | 1.34            | 0.23            | 0.15                |
| B-C-A-A  | R-Br                     | acac                           | Et <sub>3</sub> N  | DMF         | Et <sub>3</sub> N·HBr  | 0.67   | 1.8             | 1.21            | 1.04                | 0.82 | 2.79            | 2.28            | 2.21                | 0.79    | 1.26            | 0.99            | 0.91                |
| B-C-A-B  | R-Br                     | acac                           | Et <sub>3</sub> N  | NMP         | Et <sub>3</sub> N·HBr  | 0.51   | 1.2             | 0.62            | 0.45                | 0.77 | 2.21            | 1.7             | 1.62                | 0.77    | 1.18            | 0.91            | 0.84                |
| B-C-B-A  | R-Br                     | acac                           | Et <sub>2</sub> NH | DMF         | Et <sub>2</sub> NH·HBr | 0.48   | 2.49            | 1.2             | 1.03                | 0.71 | 3.2             | 2.29            | 2.21                | 0.47    | 2.12            | 1               | 0.93                |
| B-C-B-B  | R-Br                     | acac                           | Et <sub>2</sub> NH | NMP         | Et <sub>2</sub> NH·HBr | 0.32   | 1.9             | 0.6             | 0.44                | 0.65 | 2.62            | 1.71            | 1.63                | 0.45    | 2.04            | 0.93            | 0.85                |
| C-A-A-A  | R-Cl                     | OAc                            | Et <sub>3</sub> N  | DMF         | Et <sub>3</sub> N·HCl  | 0.88   | 1.1             | 0.97            | 0.8                 | 0.63 | 1.36            | 0.86            | 0.79                | 0.89    | 0.33            | 0.3             | 0.22                |
| C-A-A-B  | R-Cl                     | OAc                            | Et <sub>3</sub> N  | NMP         | Et <sub>3</sub> N·HCl  | 0.73   | 0.51            | 0.37            | 0.21                | 0.36 | 0.78            | 0.28            | 0.2                 | 0.86    | 0.26            | 0.22            | 0.14                |
| C-A-B-A  | R-Cl                     | OAc                            | Et <sub>2</sub> NH | DMF         | Et <sub>2</sub> NH·HCl | 0.55   | 1.79            | 0.99            | 0.82                | 0.49 | 1.77            | 0.86            | 0.78                | 0.24    | 1.2             | 0.28            | 0.21                |
| C-A-B-B  | R-Cl                     | OAc                            | Et <sub>2</sub> NH | NMP         | Et <sub>2</sub> NH·HCl | 0.33   | 1.2             | 0.4             | 0.23                | 0.23 | 1.19            | 0.28            | 0.2                 | 0.18    | 1.12            | 0.21            | 0.13                |
| C-B-A-A  | R-Cl                     | Cl                             | Et <sub>3</sub> N  | DMF         | Et <sub>3</sub> N·HCl  | 0.88   | 1.11            | 0.97            | 0.8                 | 0.64 | 1.38            | 0.87            | 0.8                 | 0.89    | 0.34            | 0.3             | 0.23                |
| C-B-A-B  | R-Cl                     | Cl                             | Et <sub>3</sub> N  | NMP         | Et <sub>3</sub> N·HCl  | 0.74   | 0.51            | 0.38            | 0.21                | 0.37 | 0.79            | 0.29            | 0.21                | 0.86    | 0.26            | 0.22            | 0.15                |
| C-B-B-A  | R-Cl                     | Cl                             | Et <sub>2</sub> NH | DMF         | Et <sub>2</sub> NH·HCl | 0.55   | 1.8             | 1               | 0.83                | 0.49 | 1.79            | 0.87            | 0.8                 | 0.24    | 1.2             | 0.29            | 0.21                |
| C-B-B-B  | R-Cl                     | Cl                             | Et <sub>2</sub> NH | NMP         | Et <sub>2</sub> NH·HCl | 0.33   | 1.2             | 0.4             | 0.24                | 0.24 | 1.2             | 0.29            | 0.21                | 0.19    | 1.12            | 0.21            | 0.13                |
| C-C-A-A  | R-Cl                     | acac                           | Et <sub>3</sub> N  | DMF         | Et <sub>3</sub> N·HCl  | 0.9    | 1.36            | 1.23            | 1.06                | 0.82 | 2.78            | 2.28            | 2.2                 | 0.97    | 1.04            | 1               | 0.93                |
| C-C-A-B  | R-Cl                     | acac                           | Et <sub>3</sub> N  | NMP         | Et <sub>3</sub> N·HCl  | 0.82   | 0.77            | 0.63            | 0.47                | 0.77 | 2.2             | 1.69            | 1.62                | 0.96    | 0.96            | 0.92            | 0.85                |
| C-C-B-A  | R-Cl                     | acac                           | Et <sub>2</sub> NH | DMF         | Et <sub>2</sub> NH·HCl | 0.61   | 2.05            | 1.25            | 1.08                | 0.71 | 3.19            | 2.28            | 2.2                 | 0.52    | 1.9             | 0.99            | 0.91                |
| C-C-B-B  | R-Cl                     | acac                           | Et <sub>2</sub> NH | NMP         | Et <sub>2</sub> NH·HCl | 0.45   | 1.46            | 0.66            | 0.49                | 0.65 | 2.6             | 1.69            | 1.61                | 0.5     | 1.82            | 0.91            | 0.83                |

Target product P ((*E*)-4-chloro-4'-nitrostilbene) and starting material SM1 (4-chlorostyrene) are not shown. R-I, 1-iodo-4-nitrobenzene; R-Br, 1-bromo-4-nitrobenzene; R-Cl, 1-chloro-4-nitrobenzene; DMF, dimethylformamide; NMP, *N*-methylpyrrolidone; BF, bio-Factor; CP<sub>i</sub>, initial cytotoxicity potential; CP<sub>f</sub>, final cytotoxicity potential; CP<sub>f,rel</sub>, relative final cytotoxicity potential. The reactions with the five lowest CPs are highlighted with green.

**Table S11.** bio-Factors and cytotoxicity potentials for synthesis of (*E*)-4-fluoro-4'-nitrostilbene.

| Reaction | Starting materials (SM2) | Catalyst (CT) PdA <sub>2</sub> | Reagent (R)        | Solvent (S) | Byproduct (BP)         | CaCo-2 |                 |                 |                     | FRSN |                 |                 |                     | HEK293T |                 |                 |                     |
|----------|--------------------------|--------------------------------|--------------------|-------------|------------------------|--------|-----------------|-----------------|---------------------|------|-----------------|-----------------|---------------------|---------|-----------------|-----------------|---------------------|
|          |                          |                                |                    |             |                        | BF     | CP <sub>i</sub> | CP <sub>f</sub> | CP <sub>f,rel</sub> | BF   | CP <sub>i</sub> | CP <sub>f</sub> | CP <sub>f,rel</sub> | BF      | CP <sub>i</sub> | CP <sub>f</sub> | CP <sub>f,rel</sub> |
| A-A-A-A  | R-I                      | OAc                            | Et <sub>3</sub> N  | DMF         | Et <sub>3</sub> N·HI   | 1.26   | 1.03            | 1.3             | 0.8                 | 0.78 | 1.08            | 0.85            | 0.79                | 0.92    | 0.3             | 0.28            | 0.21                |
| A-A-A-B  | R-I                      | OAc                            | Et <sub>3</sub> N  | NMP         | Et <sub>3</sub> N·HI   | 1.62   | 0.44            | 0.71            | 0.21                | 0.52 | 0.5             | 0.26            | 0.21                | 0.9     | 0.22            | 0.2             | 0.13                |
| A-A-B-A  | R-I                      | OAc                            | Et <sub>2</sub> NH | DMF         | Et <sub>2</sub> NH·HI  | 0.78   | 1.72            | 1.35            | 0.85                | 0.56 | 1.49            | 0.84            | 0.79                | 0.23    | 1.17            | 0.27            | 0.21                |
| A-A-B-B  | R-I                      | OAc                            | Et <sub>2</sub> NH | NMP         | Et <sub>2</sub> NH·HI  | 0.67   | 1.13            | 0.75            | 0.25                | 0.29 | 0.91            | 0.26            | 0.2                 | 0.18    | 1.09            | 0.2             | 0.13                |
| A-B-A-A  | R-I                      | Cl                             | Et <sub>3</sub> N  | DMF         | Et <sub>3</sub> N·HI   | 1.26   | 1.04            | 1.31            | 0.81                | 0.78 | 1.1             | 0.86            | 0.8                 | 0.92    | 0.31            | 0.28            | 0.22                |
| A-B-A-B  | R-I                      | Cl                             | Et <sub>3</sub> N  | NMP         | Et <sub>3</sub> N·HI   | 1.61   | 0.44            | 0.71            | 0.21                | 0.54 | 0.51            | 0.27            | 0.22                | 0.9     | 0.23            | 0.21            | 0.14                |
| A-B-B-A  | R-I                      | Cl                             | Et <sub>2</sub> NH | DMF         | Et <sub>2</sub> NH·HI  | 0.78   | 1.73            | 1.35            | 0.85                | 0.57 | 1.51            | 0.86            | 0.8                 | 0.24    | 1.17            | 0.28            | 0.21                |
| A-B-B-B  | R-I                      | Cl                             | Et <sub>2</sub> NH | NMP         | Et <sub>2</sub> NH·HI  | 0.67   | 1.14            | 0.76            | 0.26                | 0.29 | 0.92            | 0.27            | 0.22                | 0.18    | 1.09            | 0.2             | 0.13                |
| A-C-A-A  | R-I                      | acac                           | Et <sub>3</sub> N  | DMF         | Et <sub>3</sub> N·HI   | 1.21   | 1.29            | 1.56            | 1.06                | 0.9  | 2.5             | 2.26            | 2.21                | 0.98    | 1.01            | 0.98            | 0.92                |
| A-C-A-B  | R-I                      | acac                           | Et <sub>3</sub> N  | NMP         | Et <sub>3</sub> N·HI   | 1.39   | 0.7             | 0.97            | 0.47                | 0.88 | 1.92            | 1.68            | 1.62                | 0.97    | 0.93            | 0.91            | 0.84                |
| A-C-B-A  | R-I                      | acac                           | Et <sub>2</sub> NH | DMF         | Et <sub>2</sub> NH·HI  | 0.81   | 1.98            | 1.61            | 1.11                | 0.78 | 2.91            | 2.26            | 2.2                 | 0.52    | 1.87            | 0.98            | 0.91                |
| A-C-B-B  | R-I                      | acac                           | Et <sub>2</sub> NH | NMP         | Et <sub>2</sub> NH·HI  | 0.73   | 1.39            | 1.01            | 0.51                | 0.72 | 2.32            | 1.67            | 1.62                | 0.5     | 1.79            | 0.9             | 0.83                |
| B-A-A-A  | R-Br                     | OAc                            | Et <sub>3</sub> N  | DMF         | Et <sub>3</sub> N·HBr  | 0.87   | 1.48            | 1.28            | 0.78                | 0.75 | 1.13            | 0.85            | 0.79                | 0.53    | 0.52            | 0.28            | 0.21                |
| B-A-A-B  | R-Br                     | OAc                            | Et <sub>3</sub> N  | NMP         | Et <sub>3</sub> N·HBr  | 0.78   | 0.89            | 0.69            | 0.19                | 0.48 | 0.55            | 0.26            | 0.21                | 0.44    | 0.45            | 0.2             | 0.13                |
| B-A-B-A  | R-Br                     | OAc                            | Et <sub>2</sub> NH | DMF         | Et <sub>2</sub> NH·HBr | 0.59   | 2.17            | 1.27            | 0.77                | 0.55 | 1.54            | 0.85            | 0.8                 | 0.21    | 1.39            | 0.29            | 0.22                |
| B-A-B-B  | R-Br                     | OAc                            | Et <sub>2</sub> NH | NMP         | Et <sub>2</sub> NH·HBr | 0.43   | 1.58            | 0.68            | 0.18                | 0.28 | 0.96            | 0.27            | 0.21                | 0.16    | 1.31            | 0.21            | 0.14                |
| B-B-A-A  | R-Br                     | Cl                             | Et <sub>3</sub> N  | DMF         | Et <sub>3</sub> N·HBr  | 0.87   | 1.49            | 1.29            | 0.79                | 0.75 | 1.15            | 0.86            | 0.8                 | 0.53    | 0.53            | 0.28            | 0.21                |
| B-B-A-B  | R-Br                     | Cl                             | Et <sub>3</sub> N  | NMP         | Et <sub>3</sub> N·HBr  | 0.78   | 0.89            | 0.69            | 0.19                | 0.49 | 0.56            | 0.28            | 0.22                | 0.45    | 0.45            | 0.2             | 0.14                |
| B-B-B-A  | R-Br                     | Cl                             | Et <sub>2</sub> NH | DMF         | Et <sub>2</sub> NH·HBr | 0.59   | 2.18            | 1.28            | 0.78                | 0.56 | 1.56            | 0.86            | 0.81                | 0.21    | 1.39            | 0.29            | 0.23                |
| B-B-B-B  | R-Br                     | Cl                             | Et <sub>2</sub> NH | NMP         | Et <sub>2</sub> NH·HBr | 0.43   | 1.59            | 0.68            | 0.18                | 0.29 | 0.97            | 0.28            | 0.23                | 0.16    | 1.31            | 0.22            | 0.15                |
| B-C-A-A  | R-Br                     | acac                           | Et <sub>3</sub> N  | DMF         | Et <sub>3</sub> N·HBr  | 0.89   | 1.74            | 1.54            | 1.04                | 0.89 | 2.55            | 2.26            | 2.21                | 0.8     | 1.23            | 0.98            | 0.91                |
| B-C-A-B  | R-Br                     | acac                           | Et <sub>3</sub> N  | NMP         | Et <sub>3</sub> N·HBr  | 0.83   | 1.15            | 0.95            | 0.45                | 0.85 | 1.97            | 1.68            | 1.62                | 0.78    | 1.15            | 0.9             | 0.84                |
| B-C-B-A  | R-Br                     | acac                           | Et <sub>2</sub> NH | DMF         | Et <sub>2</sub> NH·HBr | 0.63   | 2.43            | 1.53            | 1.03                | 0.77 | 2.96            | 2.27            | 2.21                | 0.48    | 2.09            | 0.99            | 0.93                |
| B-C-B-B  | R-Br                     | acac                           | Et <sub>2</sub> NH | NMP         | Et <sub>2</sub> NH·HBr | 0.51   | 1.84            | 0.94            | 0.44                | 0.71 | 2.37            | 1.68            | 1.63                | 0.46    | 2.01            | 0.92            | 0.85                |
| C-A-A-A  | R-Cl                     | OAc                            | Et <sub>3</sub> N  | DMF         | Et <sub>3</sub> N·HCl  | 1.24   | 1.05            | 1.3             | 0.8                 | 0.75 | 1.12            | 0.84            | 0.79                | 0.94    | 0.3             | 0.29            | 0.22                |
| C-A-A-B  | R-Cl                     | OAc                            | Et <sub>3</sub> N  | NMP         | Et <sub>3</sub> N·HCl  | 1.56   | 0.45            | 0.71            | 0.21                | 0.48 | 0.54            | 0.26            | 0.2                 | 0.92    | 0.23            | 0.21            | 0.14                |
| C-A-B-A  | R-Cl                     | OAc                            | Et <sub>2</sub> NH | DMF         | Et <sub>2</sub> NH·HCl | 0.76   | 1.74            | 1.32            | 0.82                | 0.55 | 1.53            | 0.84            | 0.78                | 0.23    | 1.17            | 0.27            | 0.21                |
| C-A-B-B  | R-Cl                     | OAc                            | Et <sub>2</sub> NH | NMP         | Et <sub>2</sub> NH·HCl | 0.64   | 1.14            | 0.73            | 0.23                | 0.27 | 0.94            | 0.26            | 0.2                 | 0.18    | 1.09            | 0.2             | 0.13                |
| C-B-A-A  | R-Cl                     | Cl                             | Et <sub>3</sub> N  | DMF         | Et <sub>3</sub> N·HCl  | 1.24   | 1.05            | 1.3             | 0.8                 | 0.75 | 1.13            | 0.85            | 0.8                 | 0.94    | 0.31            | 0.29            | 0.23                |
| C-B-A-B  | R-Cl                     | Cl                             | Et <sub>3</sub> N  | NMP         | Et <sub>3</sub> N·HCl  | 1.56   | 0.46            | 0.71            | 0.21                | 0.49 | 0.55            | 0.27            | 0.21                | 0.93    | 0.23            | 0.21            | 0.15                |
| C-B-B-A  | R-Cl                     | Cl                             | Et <sub>2</sub> NH | DMF         | Et <sub>2</sub> NH·HCl | 0.76   | 1.74            | 1.33            | 0.83                | 0.55 | 1.54            | 0.85            | 0.8                 | 0.24    | 1.17            | 0.28            | 0.21                |
| C-B-B-B  | R-Cl                     | Cl                             | Et <sub>2</sub> NH | NMP         | Et <sub>2</sub> NH·HCl | 0.64   | 1.15            | 0.74            | 0.24                | 0.28 | 0.96            | 0.27            | 0.21                | 0.18    | 1.09            | 0.2             | 0.13                |
| C-C-A-A  | R-Cl                     | acac                           | Et <sub>3</sub> N  | DMF         | Et <sub>3</sub> N·HCl  | 1.19   | 1.3             | 1.56            | 1.06                | 0.89 | 2.53            | 2.25            | 2.2                 | 0.98    | 1.01            | 0.99            | 0.93                |
| C-C-A-B  | R-Cl                     | acac                           | Et <sub>3</sub> N  | NMP         | Et <sub>3</sub> N·HCl  | 1.36   | 0.71            | 0.97            | 0.47                | 0.86 | 1.95            | 1.67            | 1.62                | 0.98    | 0.93            | 0.91            | 0.85                |
| C-C-B-A  | R-Cl                     | acac                           | Et <sub>2</sub> NH | DMF         | Et <sub>2</sub> NH·HCl | 0.79   | 2               | 1.58            | 1.08                | 0.77 | 2.94            | 2.25            | 2.2                 | 0.52    | 1.87            | 0.98            | 0.91                |
| C-C-B-B  | R-Cl                     | acac                           | Et <sub>2</sub> NH | NMP         | Et <sub>2</sub> NH·HCl | 0.71   | 1.4             | 0.99            | 0.49                | 0.71 | 2.36            | 1.67            | 1.61                | 0.5     | 1.79            | 0.9             | 0.83                |

Target product P ((*E*)-4-fluoro-4'-nitrostilbene) and starting material SM1 (4-fluorostyrene) are not shown. R-I, 1-iodo-4-nitrobenzene; R-Br, 1-bromo-4-nitrobenzene; R-Cl, 1-chloro-4-nitrobenzene; DMF, dimethylformamide; NMP, *N*-methylpyrrolidone; BF, bio-Factor; CP<sub>i</sub>, initial cytotoxicity potential; CP<sub>f</sub>, final cytotoxicity potential; CP<sub>f,rel</sub>, relative final cytotoxicity potential. The reactions with the five lowest CPs are highlighted with green.

**Table S12.** bio-Factors and cytotoxicity potentials for synthesis of (*E*)-4-methoxystilbene.

| Reaction | Starting materials (SM2) | Catalyst (CT) PdA <sub>2</sub> | Reagent (R)        | Solvent (S) | Byproduct (BP)         | CaCo-2 |                 |                 |                     | FRSN |                 |                 |                     | HEK293T |                 |                 |                     |
|----------|--------------------------|--------------------------------|--------------------|-------------|------------------------|--------|-----------------|-----------------|---------------------|------|-----------------|-----------------|---------------------|---------|-----------------|-----------------|---------------------|
|          |                          |                                |                    |             |                        | BF     | CP <sub>i</sub> | CP <sub>f</sub> | CP <sub>f,rel</sub> | BF   | CP <sub>i</sub> | CP <sub>f</sub> | CP <sub>f,rel</sub> | BF      | CP <sub>i</sub> | CP <sub>f</sub> | CP <sub>f,rel</sub> |
| A-A-A-A  | R-I                      | OAc                            | Et <sub>3</sub> N  | DMF         | Et <sub>3</sub> N·HI   | 0.91   | 0.92            | 0.83            | 0.8                 | 0.87 | 0.95            | 0.82            | 0.79                | 1.24    | 0.27            | 0.34            | 0.21                |
| A-A-A-B  | R-I                      | OAc                            | Et <sub>3</sub> N  | NMP         | Et <sub>3</sub> N·HI   | 0.73   | 0.33            | 0.24            | 0.21                | 0.66 | 0.36            | 0.24            | 0.21                | 1.34    | 0.19            | 0.26            | 0.13                |
| A-A-B-A  | R-I                      | OAc                            | Et <sub>2</sub> NH | DMF         | Et <sub>2</sub> NH·HI  | 0.54   | 1.61            | 0.88            | 0.85                | 0.6  | 1.35            | 0.82            | 0.79                | 0.29    | 1.13            | 0.33            | 0.21                |
| A-A-B-B  | R-I                      | OAc                            | Et <sub>2</sub> NH | NMP         | Et <sub>2</sub> NH·HI  | 0.28   | 1.02            | 0.28            | 0.25                | 0.3  | 0.77            | 0.23            | 0.2                 | 0.24    | 1.06            | 0.25            | 0.13                |
| A-B-A-A  | R-I                      | Cl                             | Et <sub>3</sub> N  | DMF         | Et <sub>3</sub> N·HI   | 0.91   | 0.93            | 0.84            | 0.81                | 0.87 | 0.96            | 0.83            | 0.8                 | 1.24    | 0.28            | 0.34            | 0.22                |
| A-B-A-B  | R-I                      | Cl                             | Et <sub>3</sub> N  | NMP         | Et <sub>3</sub> N·HI   | 0.74   | 0.33            | 0.24            | 0.21                | 0.67 | 0.37            | 0.25            | 0.22                | 1.34    | 0.2             | 0.26            | 0.14                |
| A-B-B-A  | R-I                      | Cl                             | Et <sub>2</sub> NH | DMF         | Et <sub>2</sub> NH·HI  | 0.55   | 1.62            | 0.88            | 0.85                | 0.61 | 1.37            | 0.83            | 0.8                 | 0.3     | 1.14            | 0.34            | 0.21                |
| A-B-B-B  | R-I                      | Cl                             | Et <sub>2</sub> NH | NMP         | Et <sub>2</sub> NH·HI  | 0.28   | 1.02            | 0.29            | 0.26                | 0.32 | 0.78            | 0.25            | 0.22                | 0.24    | 1.06            | 0.26            | 0.13                |
| A-C-A-A  | R-I                      | acac                           | Et <sub>3</sub> N  | DMF         | Et <sub>3</sub> N·HI   | 0.93   | 1.18            | 1.09            | 1.06                | 0.95 | 2.36            | 2.24            | 2.21                | 1.07    | 0.98            | 1.04            | 0.92                |
| A-C-A-B  | R-I                      | acac                           | Et <sub>3</sub> N  | NMP         | Et <sub>3</sub> N·HI   | 0.85   | 0.59            | 0.5             | 0.47                | 0.93 | 1.78            | 1.65            | 1.62                | 1.07    | 0.9             | 0.96            | 0.84                |
| A-C-B-A  | R-I                      | acac                           | Et <sub>2</sub> NH | DMF         | Et <sub>2</sub> NH·HI  | 0.61   | 1.87            | 1.14            | 1.11                | 0.81 | 2.77            | 2.23            | 2.2                 | 0.56    | 1.84            | 1.04            | 0.91                |
| A-C-B-B  | R-I                      | acac                           | Et <sub>2</sub> NH | NMP         | Et <sub>2</sub> NH·HI  | 0.43   | 1.28            | 0.54            | 0.52                | 0.75 | 2.18            | 1.65            | 1.62                | 0.54    | 1.76            | 0.96            | 0.83                |
| B-A-A-A  | R-Br                     | OAc                            | Et <sub>3</sub> N  | DMF         | Et <sub>3</sub> N·HBr  | 0.81   | 1               | 0.81            | 0.78                | 0.81 | 1.01            | 0.82            | 0.79                | 1.18    | 0.28            | 0.33            | 0.21                |
| B-A-A-B  | R-Br                     | OAc                            | Et <sub>3</sub> N  | NMP         | Et <sub>3</sub> N·HBr  | 0.54   | 0.41            | 0.22            | 0.19                | 0.55 | 0.43            | 0.24            | 0.21                | 1.25    | 0.21            | 0.26            | 0.13                |
| B-A-B-A  | R-Br                     | OAc                            | Et <sub>2</sub> NH | DMF         | Et <sub>2</sub> NH·HBr | 0.47   | 1.7             | 0.8             | 0.77                | 0.58 | 1.42            | 0.83            | 0.8                 | 0.3     | 1.15            | 0.35            | 0.22                |
| B-A-B-B  | R-Br                     | OAc                            | Et <sub>2</sub> NH | NMP         | Et <sub>2</sub> NH·HBr | 0.19   | 1.1             | 0.21            | 0.18                | 0.29 | 0.84            | 0.24            | 0.21                | 0.25    | 1.07            | 0.27            | 0.14                |
| B-B-A-A  | R-Br                     | Cl                             | Et <sub>3</sub> N  | DMF         | Et <sub>3</sub> N·HBr  | 0.81   | 1.01            | 0.82            | 0.79                | 0.81 | 1.03            | 0.83            | 0.8                 | 1.18    | 0.29            | 0.34            | 0.21                |
| B-B-A-B  | R-Br                     | Cl                             | Et <sub>3</sub> N  | NMP         | Et <sub>3</sub> N·HBr  | 0.54   | 0.41            | 0.22            | 0.19                | 0.57 | 0.44            | 0.25            | 0.22                | 1.24    | 0.21            | 0.26            | 0.14                |
| B-B-B-A  | R-Br                     | Cl                             | Et <sub>2</sub> NH | DMF         | Et <sub>2</sub> NH·HBr | 0.47   | 1.7             | 0.81            | 0.78                | 0.58 | 1.44            | 0.84            | 0.81                | 0.31    | 1.15            | 0.35            | 0.23                |
| B-B-B-B  | R-Br                     | Cl                             | Et <sub>2</sub> NH | NMP         | Et <sub>2</sub> NH·HBr | 0.19   | 1.11            | 0.21            | 0.18                | 0.3  | 0.85            | 0.26            | 0.23                | 0.26    | 1.07            | 0.27            | 0.15                |
| B-C-A-A  | R-Br                     | acac                           | Et <sub>3</sub> N  | DMF         | Et <sub>3</sub> N·HBr  | 0.85   | 1.26            | 1.07            | 1.04                | 0.92 | 2.43            | 2.24            | 2.21                | 1.05    | 0.99            | 1.04            | 0.91                |
| B-C-A-B  | R-Br                     | acac                           | Et <sub>3</sub> N  | NMP         | Et <sub>3</sub> N·HBr  | 0.72   | 0.67            | 0.48            | 0.45                | 0.9  | 1.84            | 1.65            | 1.62                | 1.06    | 0.91            | 0.96            | 0.84                |
| B-C-B-A  | R-Br                     | acac                           | Et <sub>2</sub> NH | DMF         | Et <sub>2</sub> NH·HBr | 0.54   | 1.96            | 1.06            | 1.03                | 0.79 | 2.84            | 2.24            | 2.21                | 0.57    | 1.85            | 1.05            | 0.93                |
| B-C-B-B  | R-Br                     | acac                           | Et <sub>2</sub> NH | NMP         | Et <sub>2</sub> NH·HBr | 0.34   | 1.36            | 0.47            | 0.44                | 0.74 | 2.25            | 1.66            | 1.63                | 0.55    | 1.77            | 0.98            | 0.85                |

Target product P (*E*)-4-methoxystilbene) and starting material SM1 (styrene) are not shown. R-I, 1-iodo-4-methoxybenzene; R-Br, 1-bromo-4-methoxybenzene; DMF, dimethylformamide; NMP, *N*-methylpyrrolidone; BF, bio-Factor; CP<sub>i</sub>, initial cytotoxicity potential; CP<sub>f</sub>, final cytotoxicity potential; CP<sub>f,rel</sub>, relative final cytotoxicity potential.

The reactions with the five lowest CPs are highlighted with green.

**Table S13.** Dependence of  $CP_f$  and  $CP_{f\_rel}$  on the Pd : Cu ratio during the reaction period by example of synthesis of diphenylacetylene measured in CaCo-2 cells.<sup>a</sup>

| <b><math>CP_f</math></b>                     |          |               |              |               |             |               |              |               |             |
|----------------------------------------------|----------|---------------|--------------|---------------|-------------|---------------|--------------|---------------|-------------|
| <b><math>Pd, n</math> (mmol)<sup>b</sup></b> | <b>0</b> | <b>0.0025</b> | <b>0.005</b> | <b>0.0075</b> | <b>0.01</b> | <b>0.0125</b> | <b>0.015</b> | <b>0.0175</b> | <b>0.02</b> |
| <b>Conversion, %</b>                         |          |               |              |               |             |               |              |               |             |
| <b>100</b>                                   | 0.907306 | 0.904502      | 0.901699     | 0.898895      | 0.896091    | 0.893287      | 0.890484     | 0.88768       | 0.88488     |
| <b>90</b>                                    | 0.923189 | 0.920385      | 0.917582     | 0.914778      | 0.911974    | 0.90917       | 0.906367     | 0.903563      | 0.90076     |
| <b>80</b>                                    | 0.939072 | 0.936268      | 0.933464     | 0.930661      | 0.927857    | 0.925053      | 0.922249     | 0.919446      | 0.91664     |
| <b>70</b>                                    | 0.954955 | 0.952151      | 0.949347     | 0.946544      | 0.94374     | 0.940936      | 0.938132     | 0.935329      | 0.93252     |
| <b>60</b>                                    | 0.970838 | 0.968034      | 0.96523      | 0.962426      | 0.959623    | 0.956819      | 0.954015     | 0.951211      | 0.94841     |
| <b>50</b>                                    | 0.98672  | 0.983917      | 0.981113     | 0.978309      | 0.975505    | 0.972702      | 0.969898     | 0.967094      | 0.96429     |
| <b>40</b>                                    | 1.002603 | 0.9998        | 0.996996     | 0.994192      | 0.991388    | 0.988585      | 0.985781     | 0.982977      | 0.98017     |
| <b>30</b>                                    | 1.018486 | 1.015682      | 1.012879     | 1.010075      | 1.007271    | 1.004467      | 1.001664     | 0.99886       | 0.99606     |
| <b>20</b>                                    | 1.034369 | 1.031565      | 1.028762     | 1.025958      | 1.023154    | 1.02035       | 1.017547     | 1.014743      | 1.01194     |
| <b>10</b>                                    | 1.050252 | 1.047448      | 1.044644     | 1.041841      | 1.039037    | 1.036233      | 1.033429     | 1.030626      | 1.02782     |
| <b>0<sup>c</sup></b>                         | 1.066135 | 1.063331      | 1.060527     | 1.057723      | 1.05492     | 1.052116      | 1.049312     | 1.046508      | 1.04370     |
| <b><math>CP_{f\_rel}</math></b>              |          |               |              |               |             |               |              |               |             |
| <b><math>Pd, n</math> (mmol)<sup>b</sup></b> | <b>0</b> | <b>0.0025</b> | <b>0.005</b> | <b>0.0075</b> | <b>0.01</b> | <b>0.0125</b> | <b>0.015</b> | <b>0.0175</b> | <b>0.02</b> |
| <b>Conversion, %</b>                         |          |               |              |               |             |               |              |               |             |
| <b>100</b>                                   | 0.816397 | 0.813593      | 0.81079      | 0.807986      | 0.805182    | 0.802378      | 0.799575     | 0.796771      | 0.79397     |
| <b>90</b>                                    | 0.841371 | 0.838567      | 0.835763     | 0.83296       | 0.830156    | 0.827352      | 0.824548     | 0.821745      | 0.81894     |
| <b>80</b>                                    | 0.866345 | 0.863541      | 0.860737     | 0.857933      | 0.85513     | 0.852326      | 0.849522     | 0.846718      | 0.84391     |
| <b>70</b>                                    | 0.891318 | 0.888515      | 0.885711     | 0.882907      | 0.880103    | 0.8773        | 0.874496     | 0.871692      | 0.86889     |
| <b>60</b>                                    | 0.916292 | 0.913488      | 0.910685     | 0.907881      | 0.905077    | 0.902273      | 0.89947      | 0.896666      | 0.89386     |
| <b>50</b>                                    | 0.941266 | 0.938462      | 0.935658     | 0.932855      | 0.930051    | 0.927247      | 0.924443     | 0.92164       | 0.91884     |
| <b>40</b>                                    | 0.96624  | 0.963436      | 0.960632     | 0.957828      | 0.955025    | 0.952221      | 0.949417     | 0.946613      | 0.94381     |
| <b>30</b>                                    | 0.991213 | 0.98841       | 0.985606     | 0.982802      | 0.979998    | 0.977195      | 0.974391     | 0.971587      | 0.96878     |
| <b>20</b>                                    | 1.016187 | 1.013383      | 1.01058      | 1.007776      | 1.004972    | 1.002168      | 0.999365     | 0.996561      | 0.99376     |
| <b>10</b>                                    | 1.041161 | 1.038357      | 1.035553     | 1.03275       | 1.029946    | 1.027142      | 1.024338     | 1.021535      | 1.01873     |
| <b>0<sup>c</sup></b>                         | 1.066135 | 1.063331      | 1.060527     | 1.057723      | 1.05492     | 1.052116      | 1.049312     | 1.046508      | 1.04370     |

<sup>a</sup> Synthesis from phenylacetylene and bromobenzene using Pd(OAc)<sub>2</sub> and CuI as catalysts and Et<sub>3</sub>N as a base in DMF is considered. <sup>b</sup> The summarized content of Pd and Cu in the reaction equals 0.02 mmol. <sup>c</sup> Final CPs at 0% conversion equals the initial CPs of the reaction.



**Table S14.** Dependence of  $CP_f$  and  $CP_{f\_rel}$  on the Pd : Cu ratio during the reaction period by example of synthesis of diphenylacetylene measured in FRSN cells.<sup>a</sup>

| <b><math>CP_f</math></b>                     |          |               |              |               |             |               |              |               |             |
|----------------------------------------------|----------|---------------|--------------|---------------|-------------|---------------|--------------|---------------|-------------|
| <b><math>Pd, n</math> (mmol)<sup>b</sup></b> | <b>0</b> | <b>0.0025</b> | <b>0.005</b> | <b>0.0075</b> | <b>0.01</b> | <b>0.0125</b> | <b>0.015</b> | <b>0.0175</b> | <b>0.02</b> |
| <b>Conversion, %</b>                         |          |               |              |               |             |               |              |               |             |
| <b>100</b>                                   | 0.894355 | 0.889707      | 0.885059     | 0.880411      | 0.875763    | 0.871115      | 0.866467     | 0.861819      | 0.857171    |
| <b>90</b>                                    | 0.914211 | 0.909563      | 0.904915     | 0.900267      | 0.895619    | 0.890971      | 0.886323     | 0.881675      | 0.877027    |
| <b>80</b>                                    | 0.934066 | 0.929418      | 0.92477      | 0.920122      | 0.915474    | 0.910826      | 0.906178     | 0.90153       | 0.896882    |
| <b>70</b>                                    | 0.953922 | 0.949274      | 0.944626     | 0.939978      | 0.93533     | 0.930682      | 0.926034     | 0.921386      | 0.916738    |
| <b>60</b>                                    | 0.973777 | 0.969129      | 0.964481     | 0.959833      | 0.955185    | 0.950537      | 0.945889     | 0.941241      | 0.936593    |
| <b>50</b>                                    | 0.993633 | 0.988985      | 0.984337     | 0.979689      | 0.975041    | 0.970393      | 0.965745     | 0.961097      | 0.956449    |
| <b>40</b>                                    | 1.013489 | 1.008841      | 1.004193     | 0.999545      | 0.994896    | 0.990248      | 0.9856       | 0.980952      | 0.976304    |
| <b>30</b>                                    | 1.033344 | 1.028696      | 1.024048     | 1.0194        | 1.014752    | 1.010104      | 1.005456     | 1.000808      | 0.99616     |
| <b>20</b>                                    | 1.0532   | 1.048552      | 1.043904     | 1.039256      | 1.034608    | 1.02996       | 1.025312     | 1.020664      | 1.016016    |
| <b>10</b>                                    | 1.073055 | 1.068407      | 1.063759     | 1.059111      | 1.054463    | 1.049815      | 1.045167     | 1.040519      | 1.035871    |
| <b>0<sup>c</sup></b>                         | 1.092911 | 1.088263      | 1.083615     | 1.078967      | 1.074319    | 1.069671      | 1.065023     | 1.060375      | 1.055727    |
| <b><math>CP_{f\_rel}</math></b>              |          |               |              |               |             |               |              |               |             |
| <b><math>Pd, n</math> (mmol)<sup>b</sup></b> | <b>0</b> | <b>0.0025</b> | <b>0.005</b> | <b>0.0075</b> | <b>0.01</b> | <b>0.0125</b> | <b>0.015</b> | <b>0.0175</b> | <b>0.02</b> |
| <b>Conversion, %</b>                         |          |               |              |               |             |               |              |               |             |
| <b>100</b>                                   | 0.843825 | 0.839177      | 0.834529     | 0.829881      | 0.825233    | 0.820585      | 0.815937     | 0.811289      | 0.806641    |
| <b>90</b>                                    | 0.868733 | 0.864085      | 0.859437     | 0.854789      | 0.850141    | 0.845493      | 0.840845     | 0.836197      | 0.831549    |
| <b>80</b>                                    | 0.893642 | 0.888994      | 0.884346     | 0.879698      | 0.87505     | 0.870402      | 0.865754     | 0.861106      | 0.856458    |
| <b>70</b>                                    | 0.918551 | 0.913902      | 0.909254     | 0.904606      | 0.899958    | 0.89531       | 0.890662     | 0.886014      | 0.881366    |
| <b>60</b>                                    | 0.943459 | 0.938811      | 0.934163     | 0.929515      | 0.924867    | 0.920219      | 0.915571     | 0.910923      | 0.906275    |
| <b>50</b>                                    | 0.968368 | 0.96372       | 0.959072     | 0.954424      | 0.949776    | 0.945128      | 0.94048      | 0.935832      | 0.931184    |
| <b>40</b>                                    | 0.993276 | 0.988628      | 0.98398      | 0.979332      | 0.974684    | 0.970036      | 0.965388     | 0.96074       | 0.956092    |
| <b>30</b>                                    | 1.018185 | 1.013537      | 1.008889     | 1.004241      | 0.999593    | 0.994945      | 0.990297     | 0.985649      | 0.981001    |
| <b>20</b>                                    | 1.043094 | 1.038446      | 1.033798     | 1.02915       | 1.024501    | 1.019853      | 1.015205     | 1.010557      | 1.005909    |
| <b>10</b>                                    | 1.068002 | 1.063354      | 1.058706     | 1.054058      | 1.04941     | 1.044762      | 1.040114     | 1.035466      | 1.030818    |
| <b>0<sup>c</sup></b>                         | 1.092911 | 1.088263      | 1.083615     | 1.078967      | 1.074319    | 1.069671      | 1.065023     | 1.060375      | 1.055727    |

<sup>a</sup> Synthesis from phenylacetylene and bromobenzene using  $Pd(OAc)_2$  and  $CuI$  as catalysts and  $Et_3N$  as a base in DMF is considered. <sup>b</sup> The summarized content of Pd and Cu in the reaction equals 0.02 mmol. <sup>c</sup> Final CPs at 0% conversion equals the initial CPs of the reaction.

**Table S15.** Dependence of  $CP_f$  and  $CP_{f\_rel}$  on the Pd : Cu ratio during the reaction period by example of synthesis of diphenylacetylene measured in HEK293T cells.<sup>a</sup>

| <b><math>CP_f</math></b>                     |          |               |              |               |             |               |              |               |             |
|----------------------------------------------|----------|---------------|--------------|---------------|-------------|---------------|--------------|---------------|-------------|
| <b><math>Pd, n</math> (mmol)<sup>b</sup></b> | <b>0</b> | <b>0.0025</b> | <b>0.005</b> | <b>0.0075</b> | <b>0.01</b> | <b>0.0125</b> | <b>0.015</b> | <b>0.0175</b> | <b>0.02</b> |
| <b>Conversion, %</b>                         |          |               |              |               |             |               |              |               |             |
| <b>100</b>                                   | 0.273452 | 0.271722      | 0.269992     | 0.268262      | 0.266532    | 0.264802      | 0.263072     | 0.261342      | 0.259612    |
| <b>90</b>                                    | 0.279631 | 0.277901      | 0.276171     | 0.274441      | 0.272711    | 0.270981      | 0.269251     | 0.267521      | 0.265791    |
| <b>80</b>                                    | 0.285809 | 0.284079      | 0.282349     | 0.280619      | 0.278889    | 0.277159      | 0.275429     | 0.273699      | 0.271969    |
| <b>70</b>                                    | 0.291987 | 0.290257      | 0.288527     | 0.286797      | 0.285067    | 0.283337      | 0.281607     | 0.279877      | 0.278147    |
| <b>60</b>                                    | 0.298165 | 0.296435      | 0.294705     | 0.292976      | 0.291246    | 0.289516      | 0.287786     | 0.286056      | 0.284326    |
| <b>50</b>                                    | 0.304344 | 0.302614      | 0.300884     | 0.299154      | 0.297424    | 0.295694      | 0.293964     | 0.292234      | 0.290504    |
| <b>40</b>                                    | 0.310522 | 0.308792      | 0.307062     | 0.305332      | 0.303602    | 0.301872      | 0.300142     | 0.298412      | 0.296682    |
| <b>30</b>                                    | 0.3167   | 0.31497       | 0.31324      | 0.31151       | 0.30978     | 0.30805       | 0.30632      | 0.30459       | 0.30286     |
| <b>20</b>                                    | 0.322879 | 0.321149      | 0.319419     | 0.317689      | 0.315959    | 0.314229      | 0.312499     | 0.310769      | 0.309039    |
| <b>10</b>                                    | 0.329057 | 0.327327      | 0.325597     | 0.323867      | 0.322137    | 0.320407      | 0.318677     | 0.316947      | 0.315217    |
| <b>0<sup>c</sup></b>                         | 0.335235 | 0.333505      | 0.331775     | 0.330045      | 0.328315    | 0.326585      | 0.324855     | 0.323125      | 0.321395    |
| <b><math>CP_{f\_rel}</math></b>              |          |               |              |               |             |               |              |               |             |
| <b><math>Pd, n</math> (mmol)<sup>b</sup></b> | <b>0</b> | <b>0.0025</b> | <b>0.005</b> | <b>0.0075</b> | <b>0.01</b> | <b>0.0125</b> | <b>0.015</b> | <b>0.0175</b> | <b>0.02</b> |
| <b>Conversion, %</b>                         |          |               |              |               |             |               |              |               |             |
| <b>100</b>                                   | 0.231786 | 0.230056      | 0.228326     | 0.226596      | 0.224866    | 0.223136      | 0.221406     | 0.219676      | 0.217946    |
| <b>90</b>                                    | 0.242131 | 0.240401      | 0.238671     | 0.236941      | 0.235211    | 0.233481      | 0.231751     | 0.230021      | 0.228291    |
| <b>80</b>                                    | 0.252476 | 0.250746      | 0.249016     | 0.247286      | 0.245556    | 0.243826      | 0.242096     | 0.240366      | 0.238636    |
| <b>70</b>                                    | 0.262821 | 0.261091      | 0.259361     | 0.257631      | 0.255901    | 0.254171      | 0.252441     | 0.250711      | 0.248981    |
| <b>60</b>                                    | 0.273165 | 0.271435      | 0.269705     | 0.267976      | 0.266246    | 0.264516      | 0.262786     | 0.261056      | 0.259326    |
| <b>50</b>                                    | 0.28351  | 0.28178       | 0.28005      | 0.27832       | 0.27659     | 0.27486       | 0.27313      | 0.271401      | 0.269671    |
| <b>40</b>                                    | 0.293855 | 0.292125      | 0.290395     | 0.288665      | 0.286935    | 0.285205      | 0.283475     | 0.281745      | 0.280015    |
| <b>30</b>                                    | 0.3042   | 0.30247       | 0.30074      | 0.29901       | 0.29728     | 0.29555       | 0.29382      | 0.29209       | 0.29036     |
| <b>20</b>                                    | 0.314545 | 0.312815      | 0.311085     | 0.309355      | 0.307625    | 0.305895      | 0.304165     | 0.302435      | 0.300705    |
| <b>10</b>                                    | 0.32489  | 0.32316       | 0.32143      | 0.3197        | 0.31797     | 0.31624       | 0.31451      | 0.31278       | 0.31105     |
| <b>0<sup>c</sup></b>                         | 0.335235 | 0.333505      | 0.331775     | 0.330045      | 0.328315    | 0.326585      | 0.324855     | 0.323125      | 0.321395    |

<sup>a</sup> Synthesis from phenylacetylene and bromobenzene using  $Pd(OAc)_2$  and CuI as catalysts and  $Et_3N$  as a base in DMF is considered. <sup>b</sup> The summarized content of Pd and Cu in the reaction equals 0.02 mmol. <sup>c</sup> Final CPs at 0% conversion equals the initial CPs of the reaction.

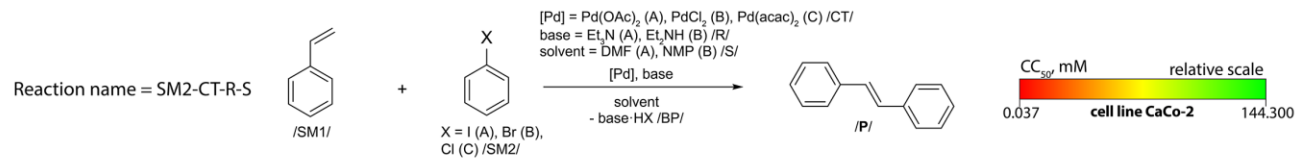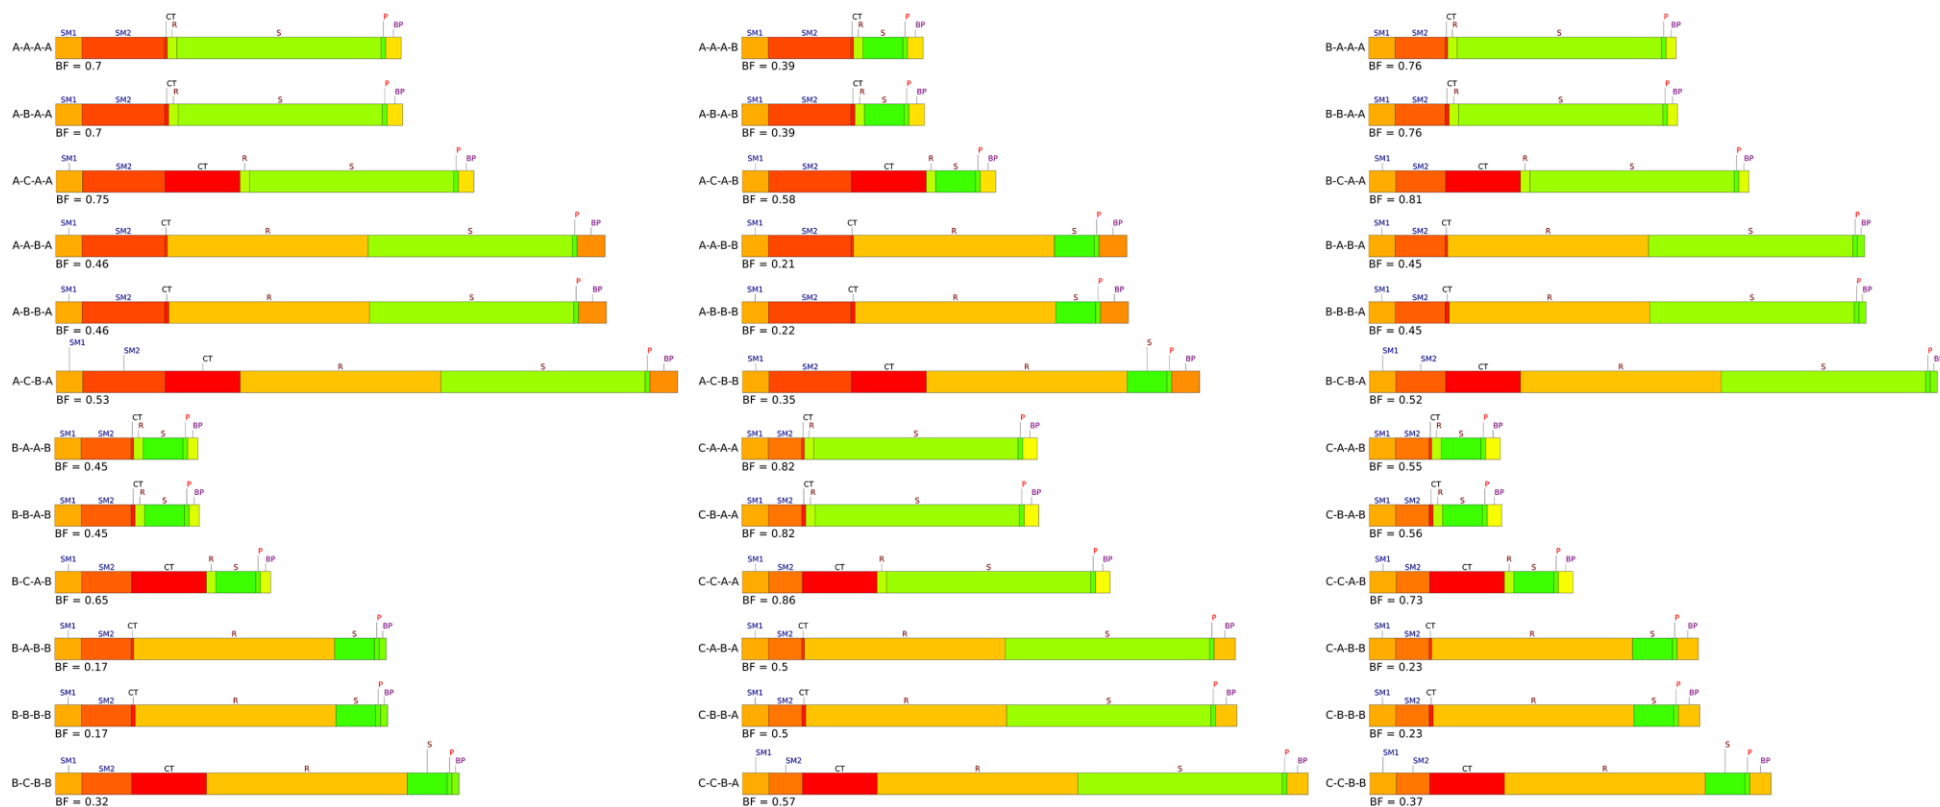

**Fig. S1.** bio-Strips of 36 synthetic routes for (*E*)-stilbene (based on 24-h  $CC_{50}$  values measured in CaCo-2 cells). The 1<sup>st</sup>, 2<sup>nd</sup>, 3<sup>rd</sup>, and 4<sup>th</sup> letters in the reaction names correspond to the types of starting material (SM2: iodobenzene (A), bromobenzene (B), or chlorobenzene (C)), catalyst (CT:  $Pd(OAc)_2$  (A),  $PdCl_2$  (B), or  $Pd(acac)_2$  (C)), base (R:  $Et_3N$  (A) or  $Et_2NH$  (B)), and solvent (S: DMF (A) or NMP (B)), respectively. The color of the strip sections corresponds to the  $CC_{50}$  of a particular substance in CaCo-2 cells (see the cytotoxicity scale above the bio-Strips). bio-Factors are shown below the strips.

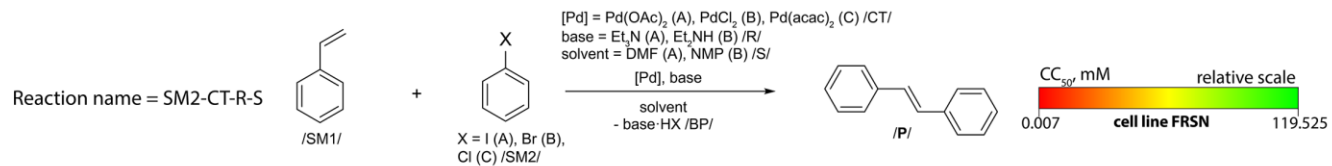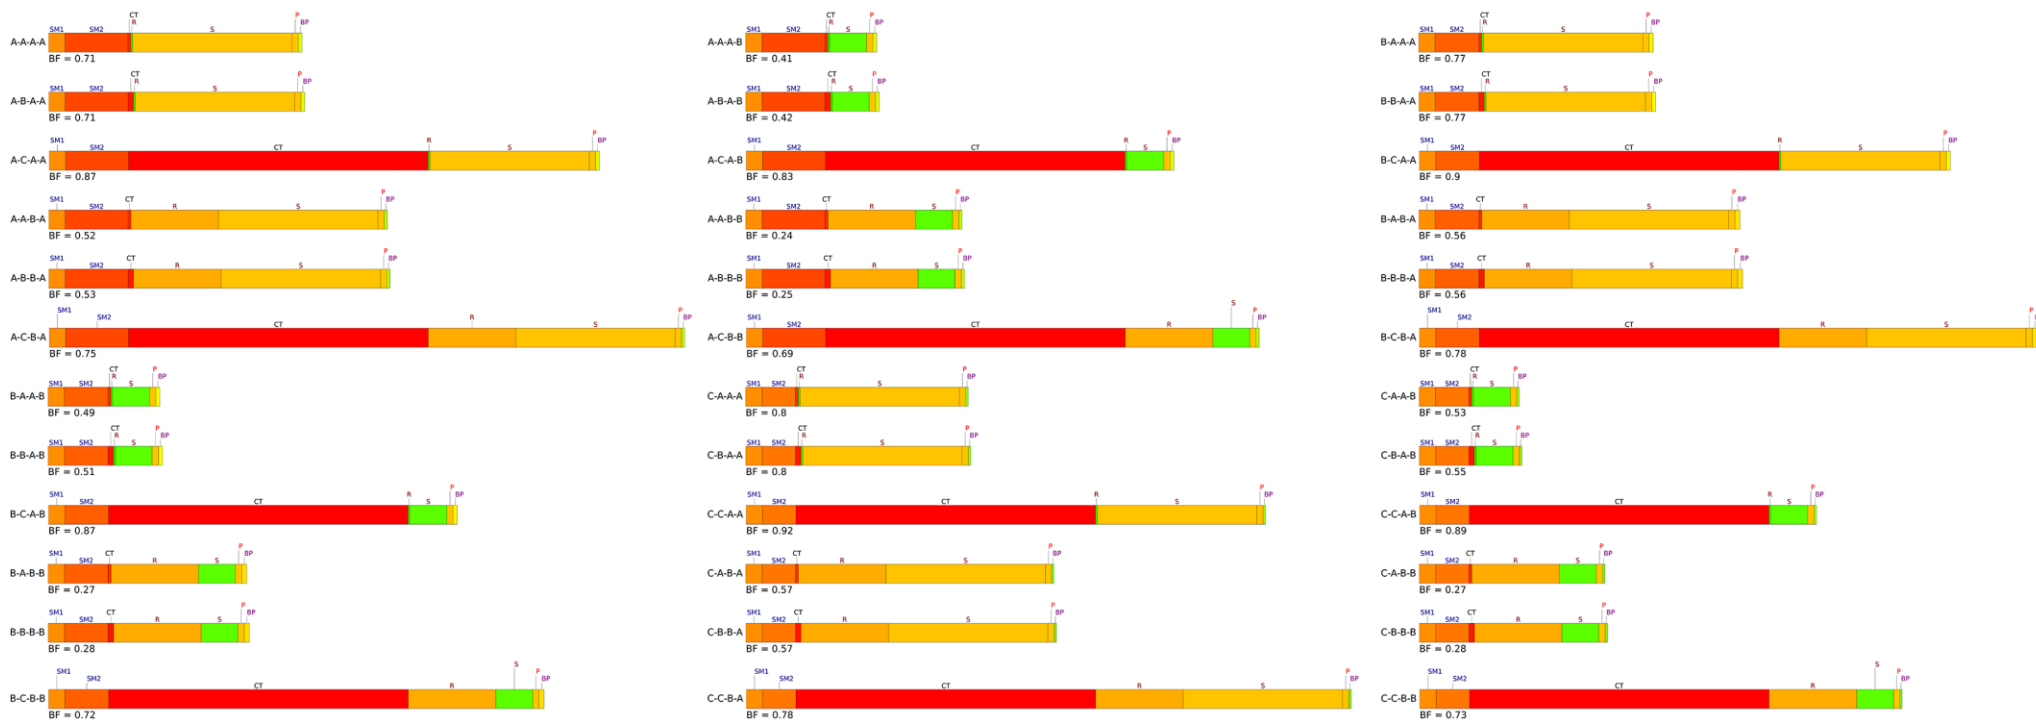

**Fig. S2.** bio-Strips of 36 synthetic routes for (*E*)-stilbene (based on 24-h CC<sub>50</sub> values measured in FR5N cells). The 1<sup>st</sup>, 2<sup>nd</sup>, 3<sup>rd</sup>, and 4<sup>th</sup> letters in the reaction names correspond to the types of starting material (SM2: iodobenzene (A), bromobenzene (B), or chlorobenzene (C)), catalyst (CT: Pd(OAc)<sub>2</sub> (A), PdCl<sub>2</sub> (B), or Pd(acac)<sub>2</sub> (C)), base (R: Et<sub>3</sub>N (A) or Et<sub>2</sub>NH (B)), and solvent (S: DMF (A) or NMP (B)), respectively. The color of the strip sections corresponds to the CC<sub>50</sub> of a particular substance in FR5N cells (see the cytotoxicity scale above the bio-Strips). bio-Factors are shown below the strips.

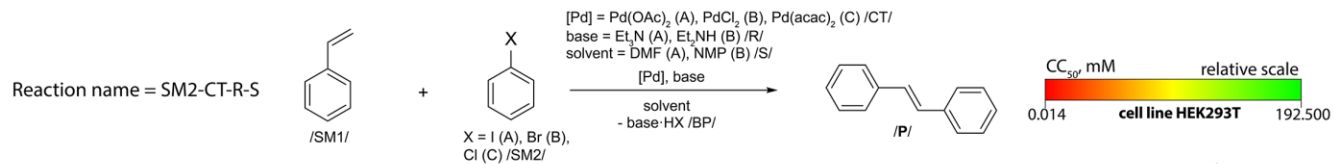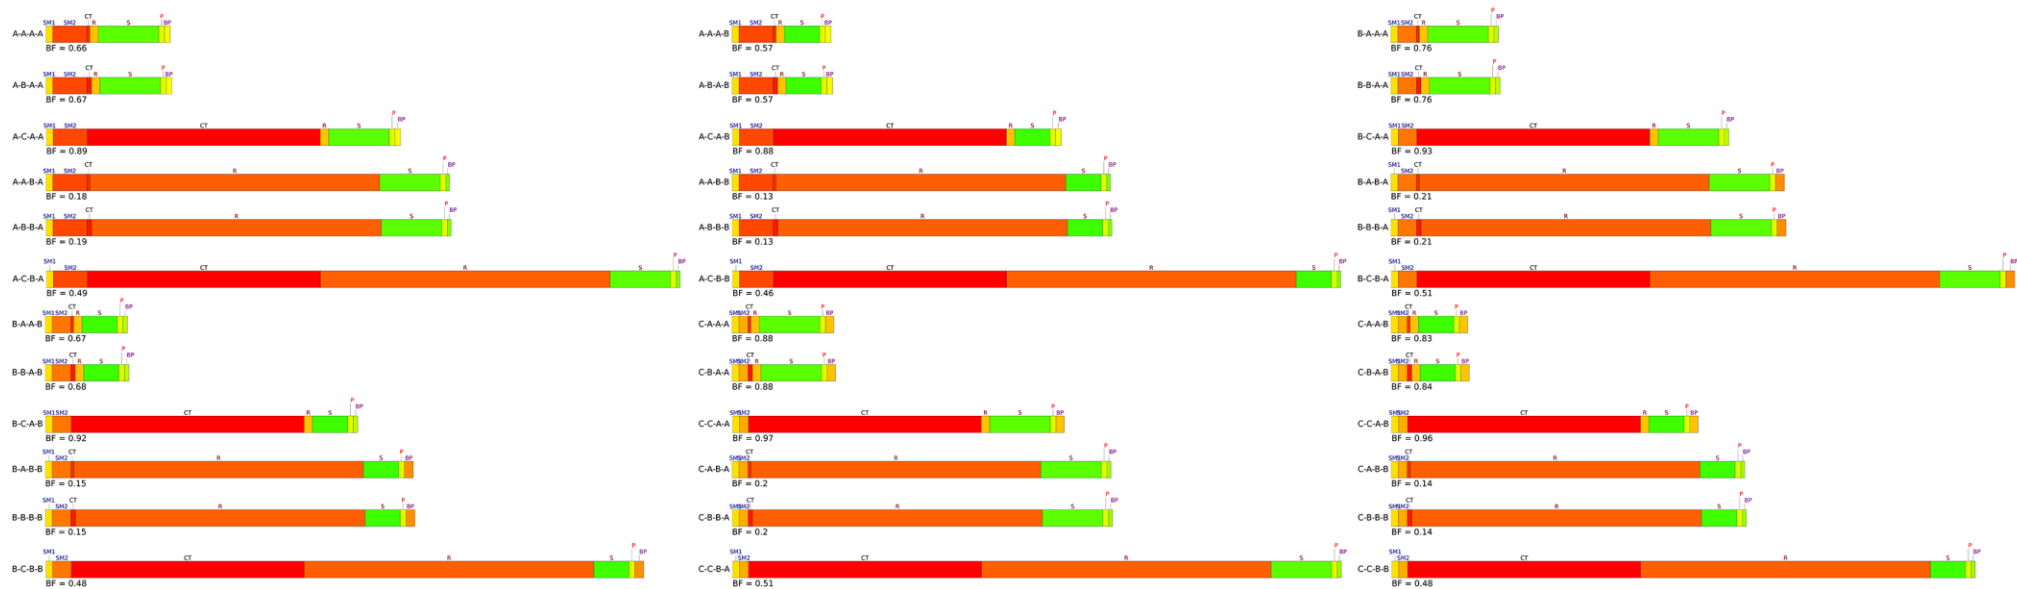

**Fig. S3.** bio-Strips of 36 synthetic routes for (*E*)-stilbene (based on 24-h CC<sub>50</sub> values measured in HEK293T cells). The 1<sup>st</sup>, 2<sup>nd</sup>, 3<sup>rd</sup>, and 4<sup>th</sup> letters in the reaction names correspond to the types of starting material (SM2: iodobenzene (A), bromobenzene (B), or chlorobenzene (C)), catalyst (CT: Pd(OAc)<sub>2</sub> (A), PdCl<sub>2</sub> (B), or Pd(acac)<sub>2</sub> (C)), base (R: Et<sub>3</sub>N (A) or Et<sub>2</sub>NH (B)), and solvent (S: DMF (A) or NMP (B)), respectively. The color of the strip sections corresponds to the CC<sub>50</sub> of a particular substance in HEK293T cells (see the cytotoxicity scale above the bio-Strips). bio-Factors are shown below the strips.

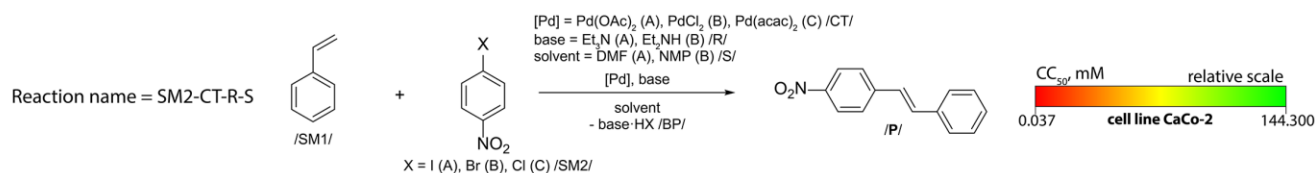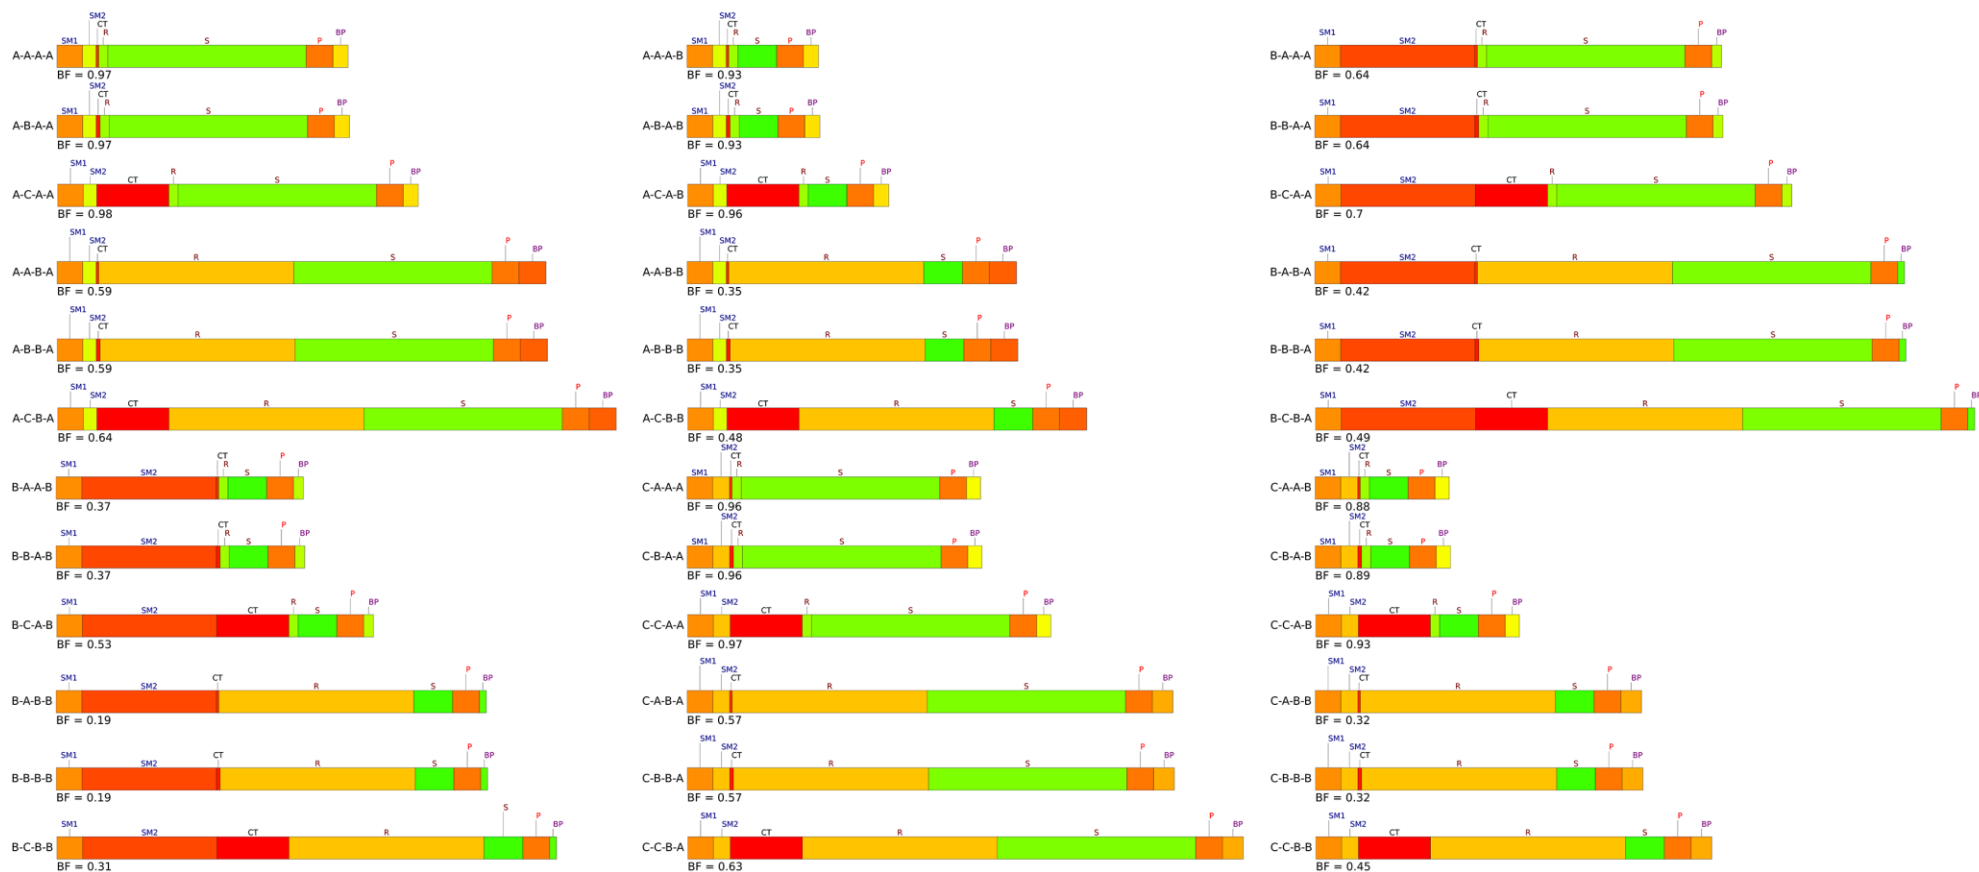

**Fig. S4.** bio-Strips of 36 synthetic routes for (*E*)-4-nitrostilbene (based on 24-h CC<sub>50</sub> values measured in CaCo-2 cells). The 1<sup>st</sup>, 2<sup>nd</sup>, 3<sup>rd</sup>, and 4<sup>th</sup> letters in the reaction names correspond to the types of starting material (SM2: 1-iodo-4-nitrobenzene (A), 1-bromo-4-nitrobenzene (B), or 1-chloro-4-nitrobenzene (C)), catalyst (CT: Pd(OAc)<sub>2</sub> (A), PdCl<sub>2</sub> (B), or Pd(acac)<sub>2</sub> (C)), base (R: Et<sub>3</sub>N (A) or Et<sub>2</sub>NH (B)), and solvent (S: DMF (A) or NMP (B)), respectively. The color of the strip sections corresponds to the CC<sub>50</sub> of a particular substance in CaCo-2 cells (see the cytotoxicity scale above the bio-Strips). bio-Factors are shown below the strips.

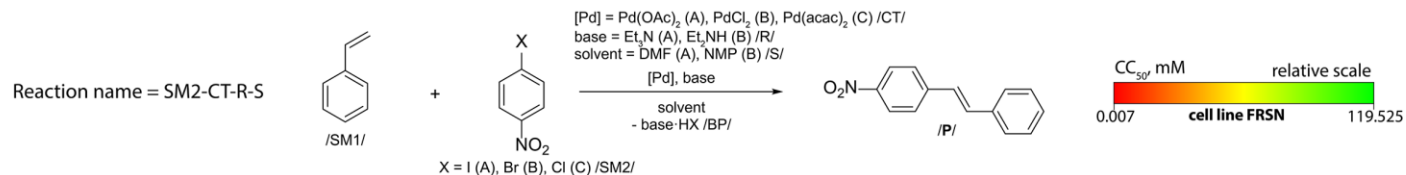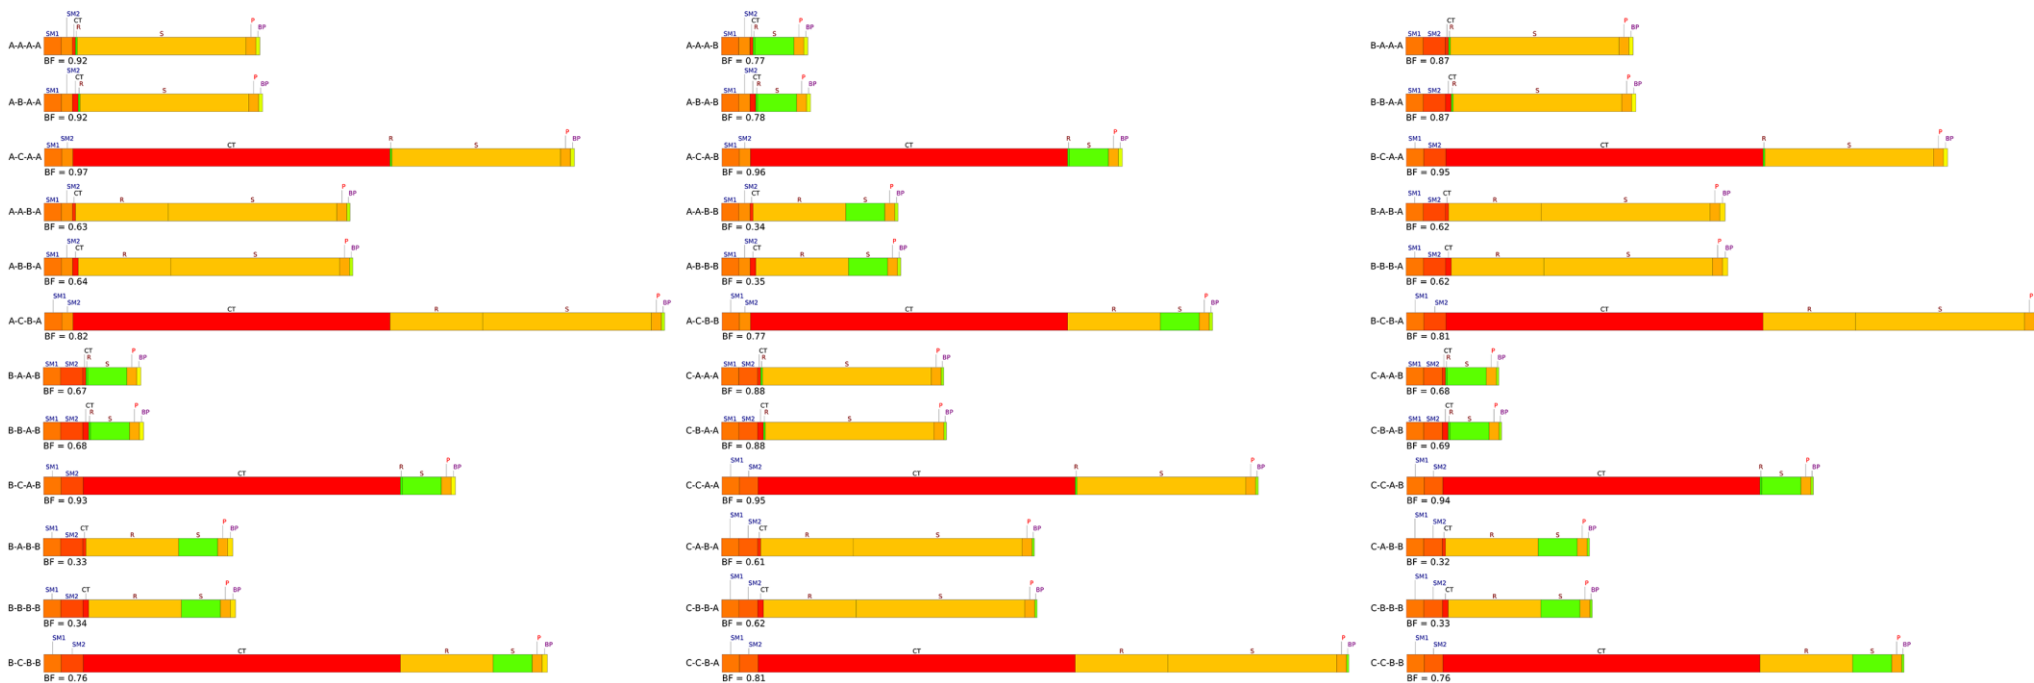

**Fig. S5.** bio-Strips of 36 synthetic routes for (E)-4-nitrostilbene (based on 24-h CC<sub>50</sub> values measured in FRSN cells). The 1<sup>st</sup>, 2<sup>nd</sup>, 3<sup>rd</sup>, and 4<sup>th</sup> letters in the reaction names correspond to the types of starting material (SM2: 1-iodo-4-nitrobenzene (A), 1-bromo-4-nitrobenzene (B), or 1-chloro-4-nitrobenzene (C)), catalyst (CT: Pd(OAc)<sub>2</sub> (A), PdCl<sub>2</sub> (B), or Pd(acac)<sub>2</sub> (C)), base (R: Et<sub>3</sub>N (A) or Et<sub>2</sub>NH (B)), and solvent (S: DMF (A) or NMP (B)), respectively. The color of the strip sections corresponds to the CC<sub>50</sub> of a particular substance in FRSN cells (see the cytotoxicity scale above the bio-Strips). Bio-Factors are shown below the strips.

Reaction name = SM2-CT-R-S

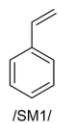

X = I (A), Br (B), Cl (C) /SM2/

[Pd] = Pd(OAc)<sub>2</sub> (A), PdCl<sub>2</sub> (B), Pd(acac)<sub>2</sub> (C) /CT/  
 base = Et<sub>3</sub>N (A), Et<sub>2</sub>NH (B) /R/  
 solvent = DMF (A), NMP (B) /S/

[Pd], base  
 solvent  
 - base·HX /BP/

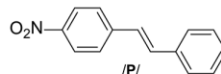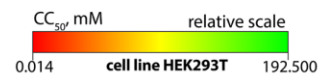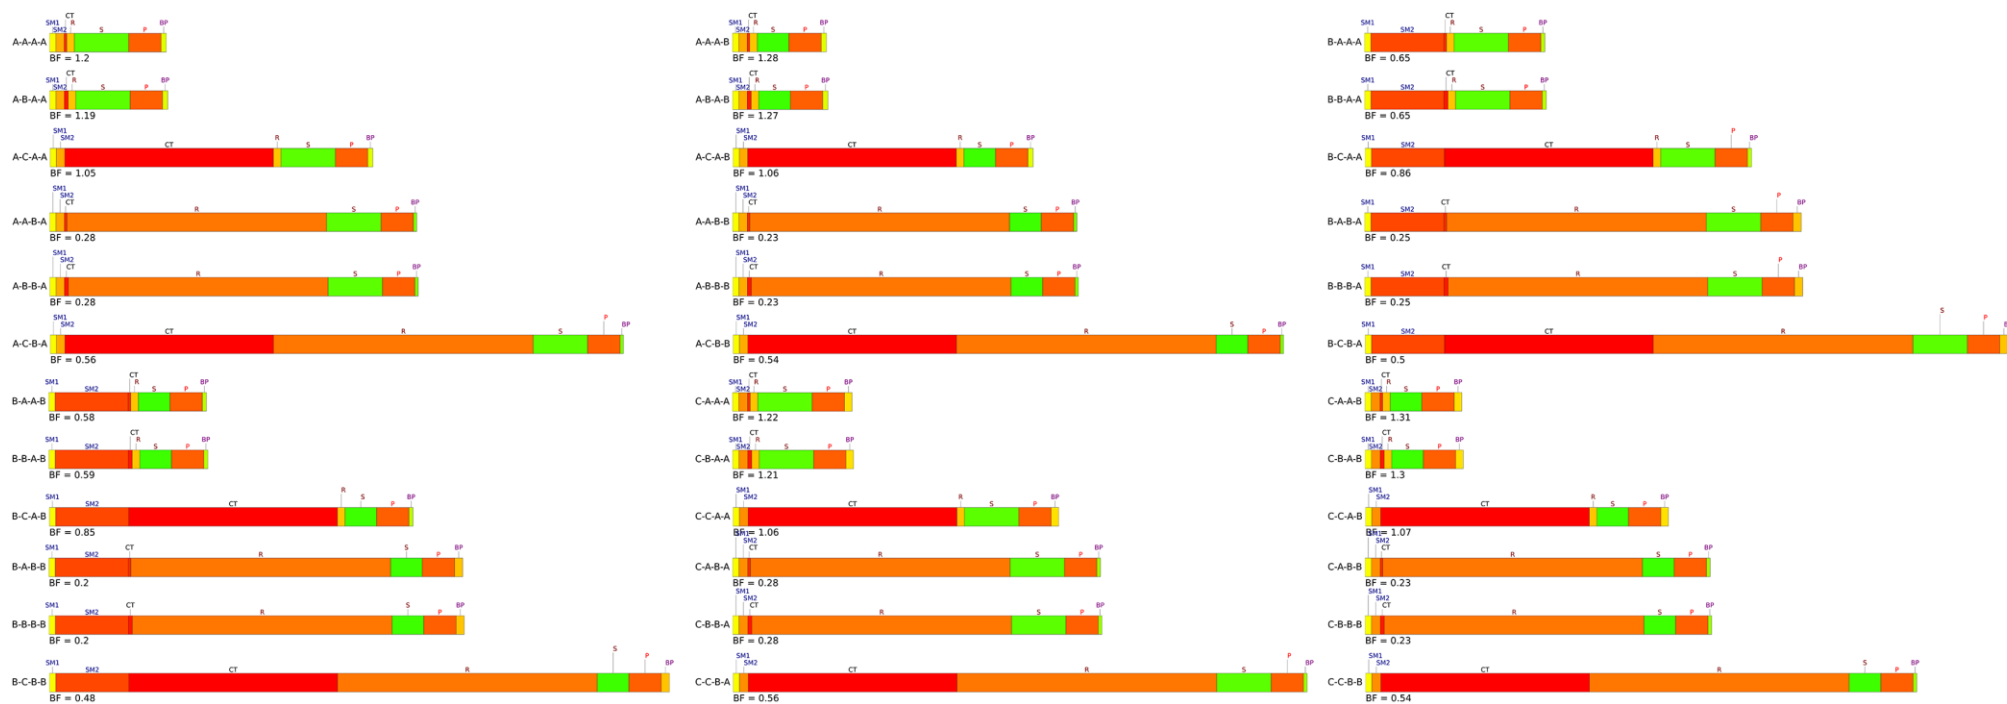

**Fig. S6.** bio-Strips of 36 synthetic routes for (*E*)-4-nitrostilbene (based on 24-h CC<sub>50</sub> values measured in HEK293T cells). The 1<sup>st</sup>, 2<sup>nd</sup>, 3<sup>rd</sup>, and 4<sup>th</sup> letters in the reaction names correspond to the types of starting material (SM2: 1-iodo-4-nitrobenzene (A), 1-bromo-4-nitrobenzene (B), or 1-chloro-4-nitrobenzene (C)), catalyst (CT: Pd(OAc)<sub>2</sub> (A), PdCl<sub>2</sub> (B), or Pd(acac)<sub>2</sub> (C)), base (R: Et<sub>3</sub>N (A) or Et<sub>2</sub>NH (B)), and solvent (S: DMF (A) or NMP (B)), respectively. The color of the strip sections corresponds to the CC<sub>50</sub> of a particular substance in HEK293T cells (see the cytotoxicity scale above the bio-Strips). bio-Factors are shown below the strips.



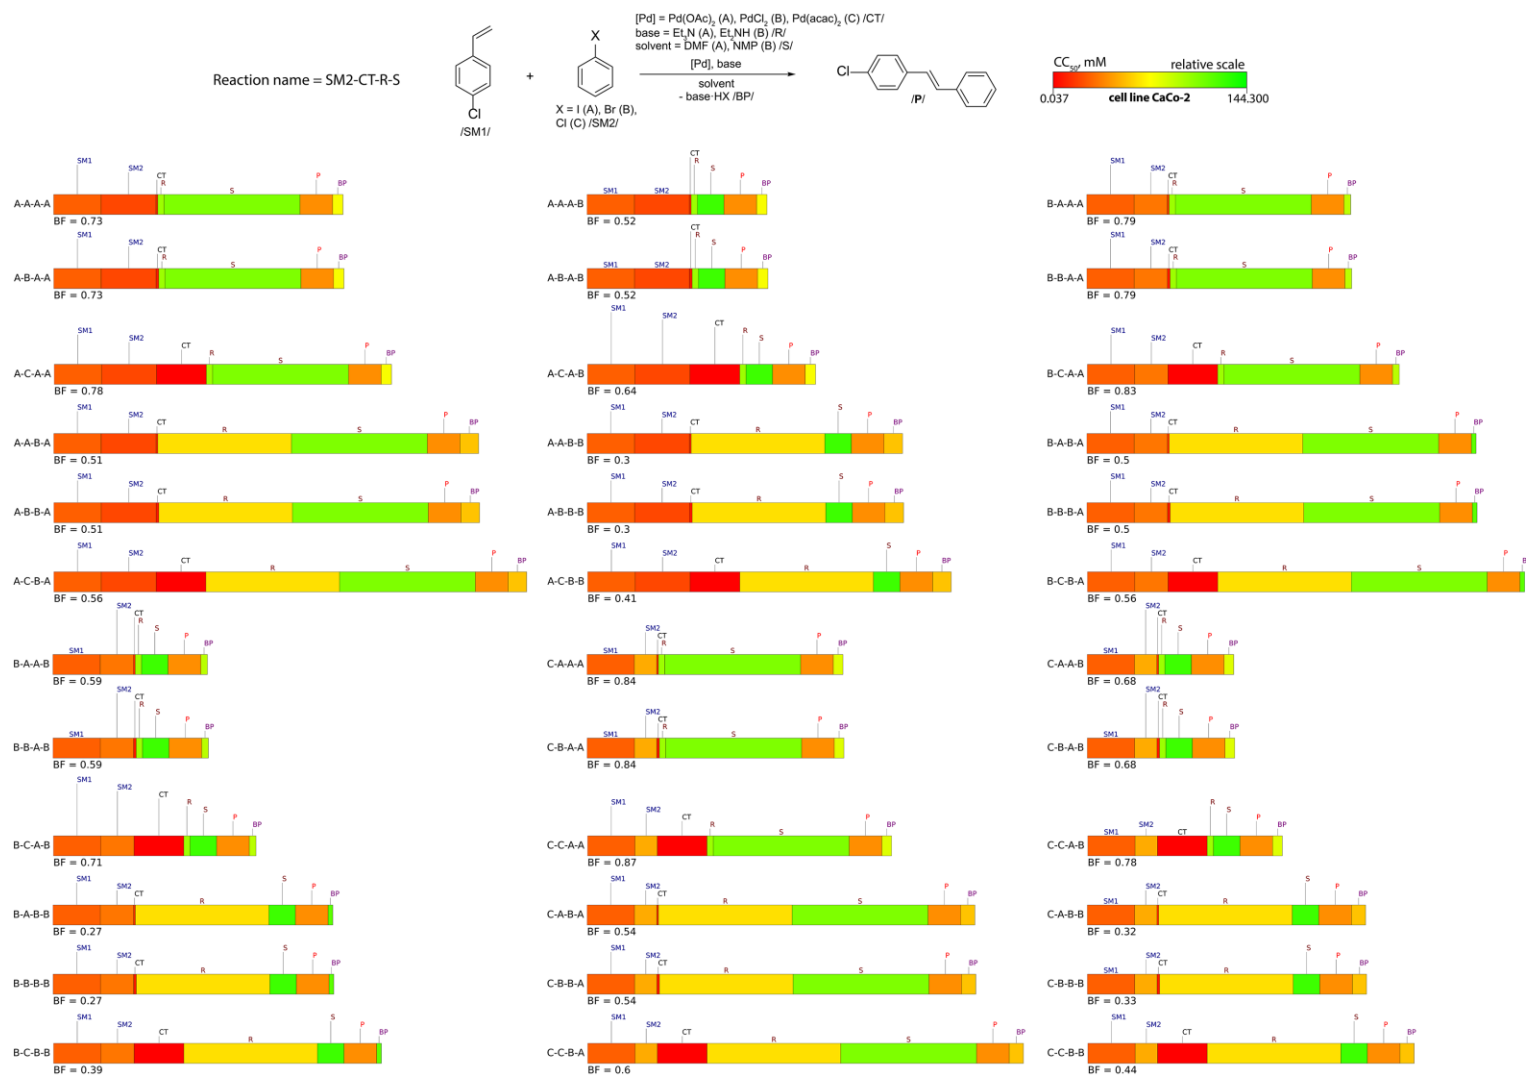

**Fig. S7.** bio-Strips of 36 synthetic routes for (*E*)-4-chlorostilbene (based on 24-h  $CC_{50}$  values measured in CaCo-2 cells). The 1<sup>st</sup>, 2<sup>nd</sup>, 3<sup>rd</sup>, and 4<sup>th</sup> letters in the reaction names correspond to the types of starting material (SM2: iodobenzene (A), bromobenzene (B), or chlorobenzene (C)), catalyst (CT: Pd(OAc)<sub>2</sub> (A), PdCl<sub>2</sub> (B), or Pd(acac)<sub>2</sub> (C)), base (R: Et<sub>3</sub>N (A) or Et<sub>2</sub>NH (B)), and solvent (S: DMF (A) or NMP (B)), respectively. The color of the strip sections corresponds to the  $CC_{50}$  of a particular substance in CaCo-2 cells (see the cytotoxicity scale above the bio-Strips). bio-Factors are shown below the strips.

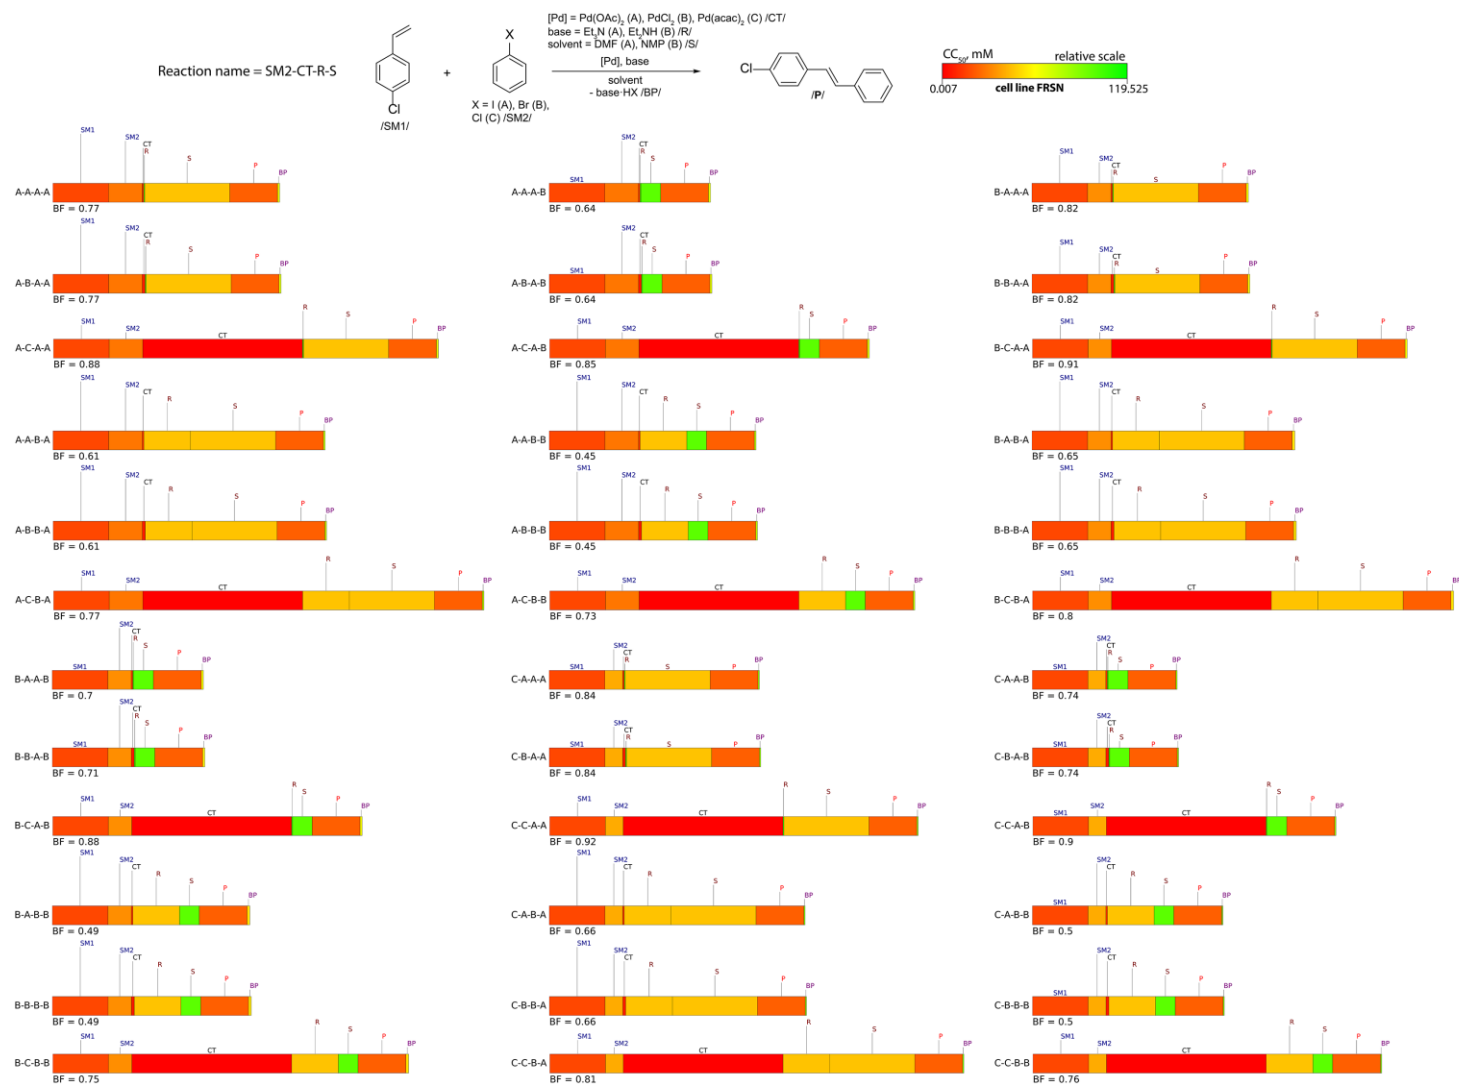

**Fig. S8.** bio-Strips of 36 synthetic routes for (*E*)-4-chlorostilbene (based on 24-h  $CC_{50}$  values measured in FRSN cells). The 1<sup>st</sup>, 2<sup>nd</sup>, 3<sup>rd</sup>, and 4<sup>th</sup> letters in the reaction names correspond to the types of starting material (SM2: iodobenzene (A), bromobenzene (B), or chlorobenzene (C)), catalyst (CT:  $Pd(OAc)_2$  (A),  $PdCl_2$  (B), or  $Pd(acac)_2$  (C)), base (R:  $Et_3N$  (A) or  $Et_2NH$  (B)), and solvent (S: DMF (A) or NMP (B)), respectively. The color of the strip sections corresponds to the  $CC_{50}$  of a particular substance in FRSN cells (see the cytotoxicity scale above the bio-Strips). bio-Factors are shown below the strips.

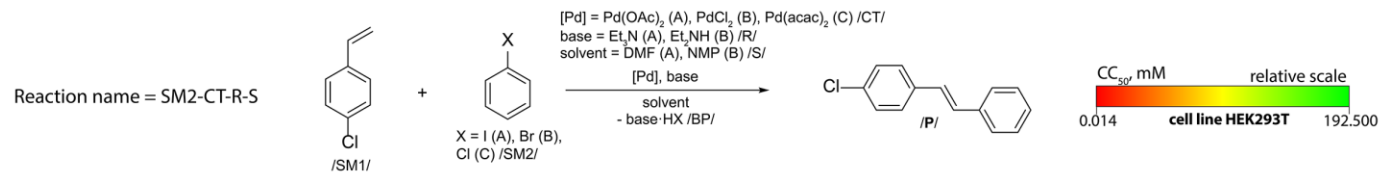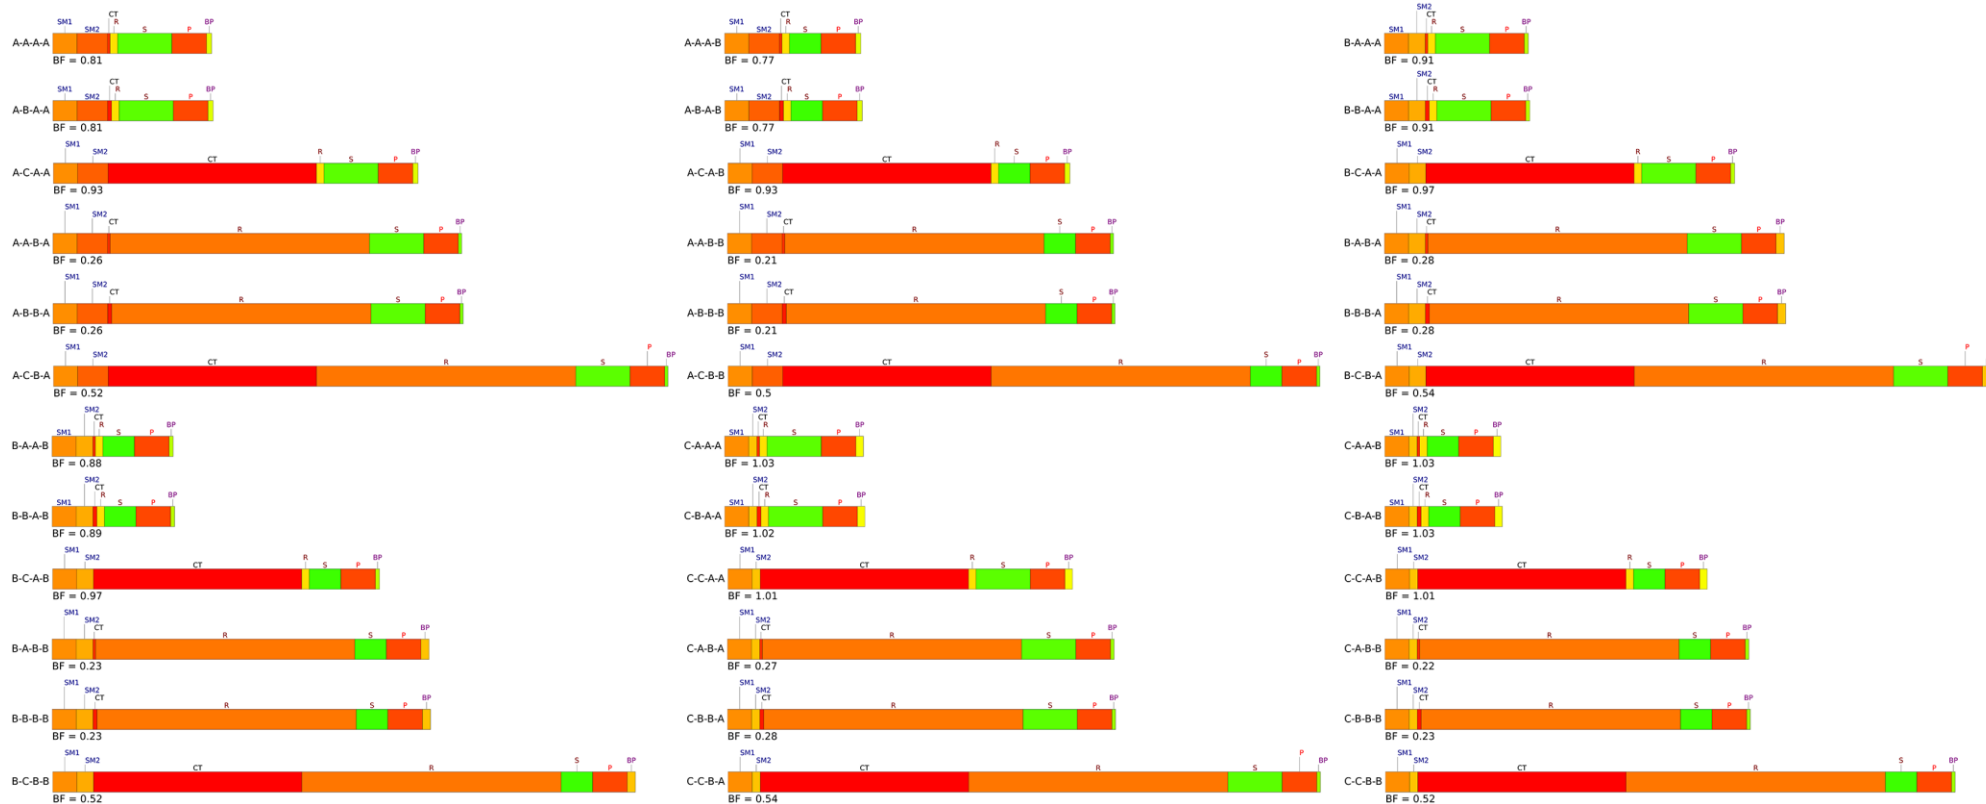

**Fig. S9.** bio-Strips of 36 synthetic routes for (*E*)-4-chlorostilbene (based on 24-h CC<sub>50</sub> values measured in HEK293T cells). The 1<sup>st</sup>, 2<sup>nd</sup>, 3<sup>rd</sup>, and 4<sup>th</sup> letters in the reaction names correspond to the types of starting material (SM2: iodobenzene (A), bromobenzene (B), or chlorobenzene (C)), catalyst (CT: Pd(OAc)<sub>2</sub> (A), PdCl<sub>2</sub> (B), or Pd(acac)<sub>2</sub> (C)), base (R: Et<sub>3</sub>N (A) or Et<sub>2</sub>NH (B)), and solvent (S: DMF (A) or NMP (B)), respectively. The color of the strip sections corresponds to the CC<sub>50</sub> of a particular substance in HEK293T cells (see the cytotoxicity scale above the bio-Strips). bio-Factors are shown below the strips.

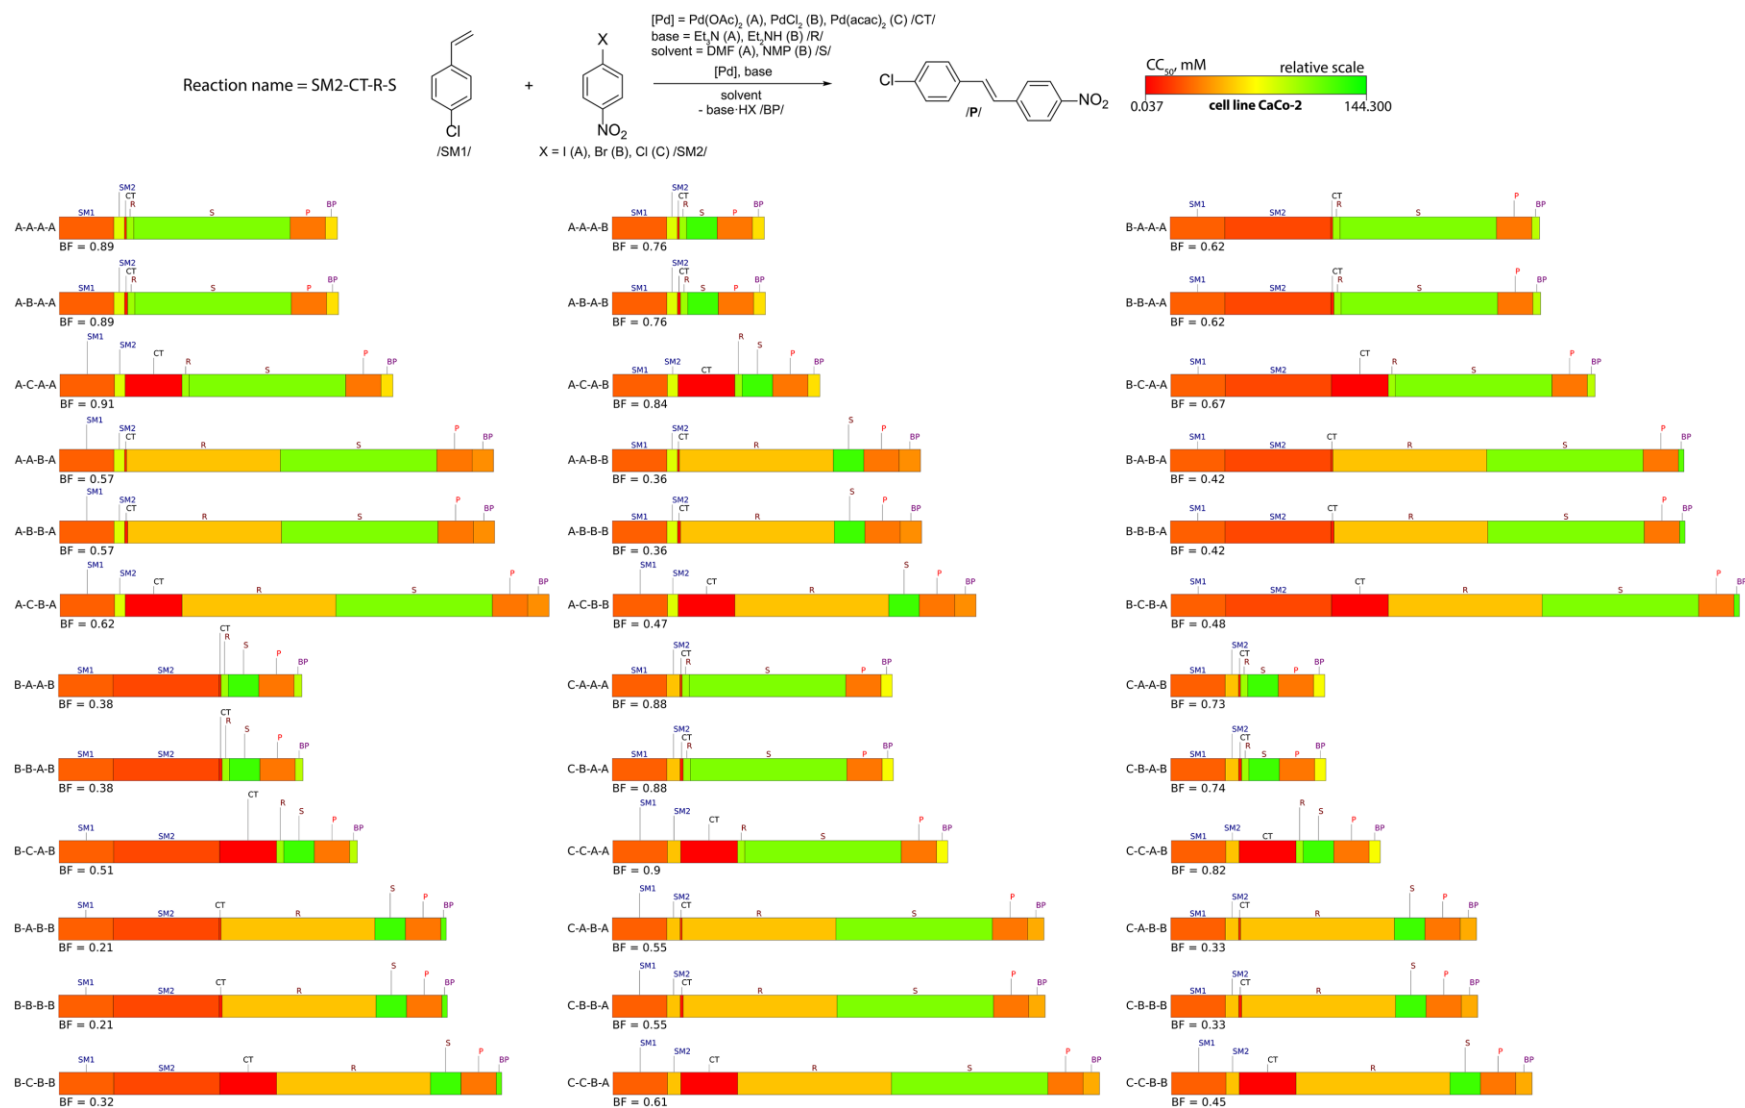

**Fig. S10.** bio-Strips of 36 synthetic routes for (*E*)-4-chloro-4'-nitrostilbene (based on 24-h  $CC_{50}$  values measured in CaCo-2 cells). The 1<sup>st</sup>, 2<sup>nd</sup>, 3<sup>rd</sup>, and 4<sup>th</sup> letters in the reaction names correspond to the types of starting material (SM2: 1-iodo-4-nitrobenzene (A), 1-bromo-4-nitrobenzene (B), or 1-chloro-4-nitrobenzene (C)), catalyst (CT:  $Pd(OAc)_2$  (A),  $PdCl_2$  (B), or  $Pd(acac)_2$  (C)), base (R:  $Et_3N$  (A) or  $Et_2NH$  (B)), and solvent (S: DMF (A) or NMP (B)), respectively. The color of the strip sections corresponds to the  $CC_{50}$  of a particular substance in CaCo-2 cells (see the cytotoxicity scale above the bio-Strips). bio-Factors are shown below the strips.

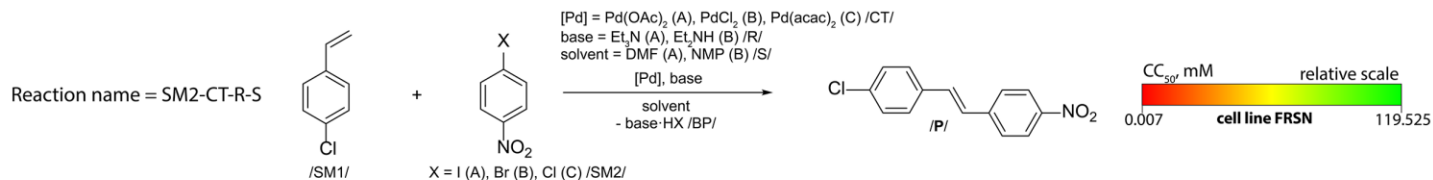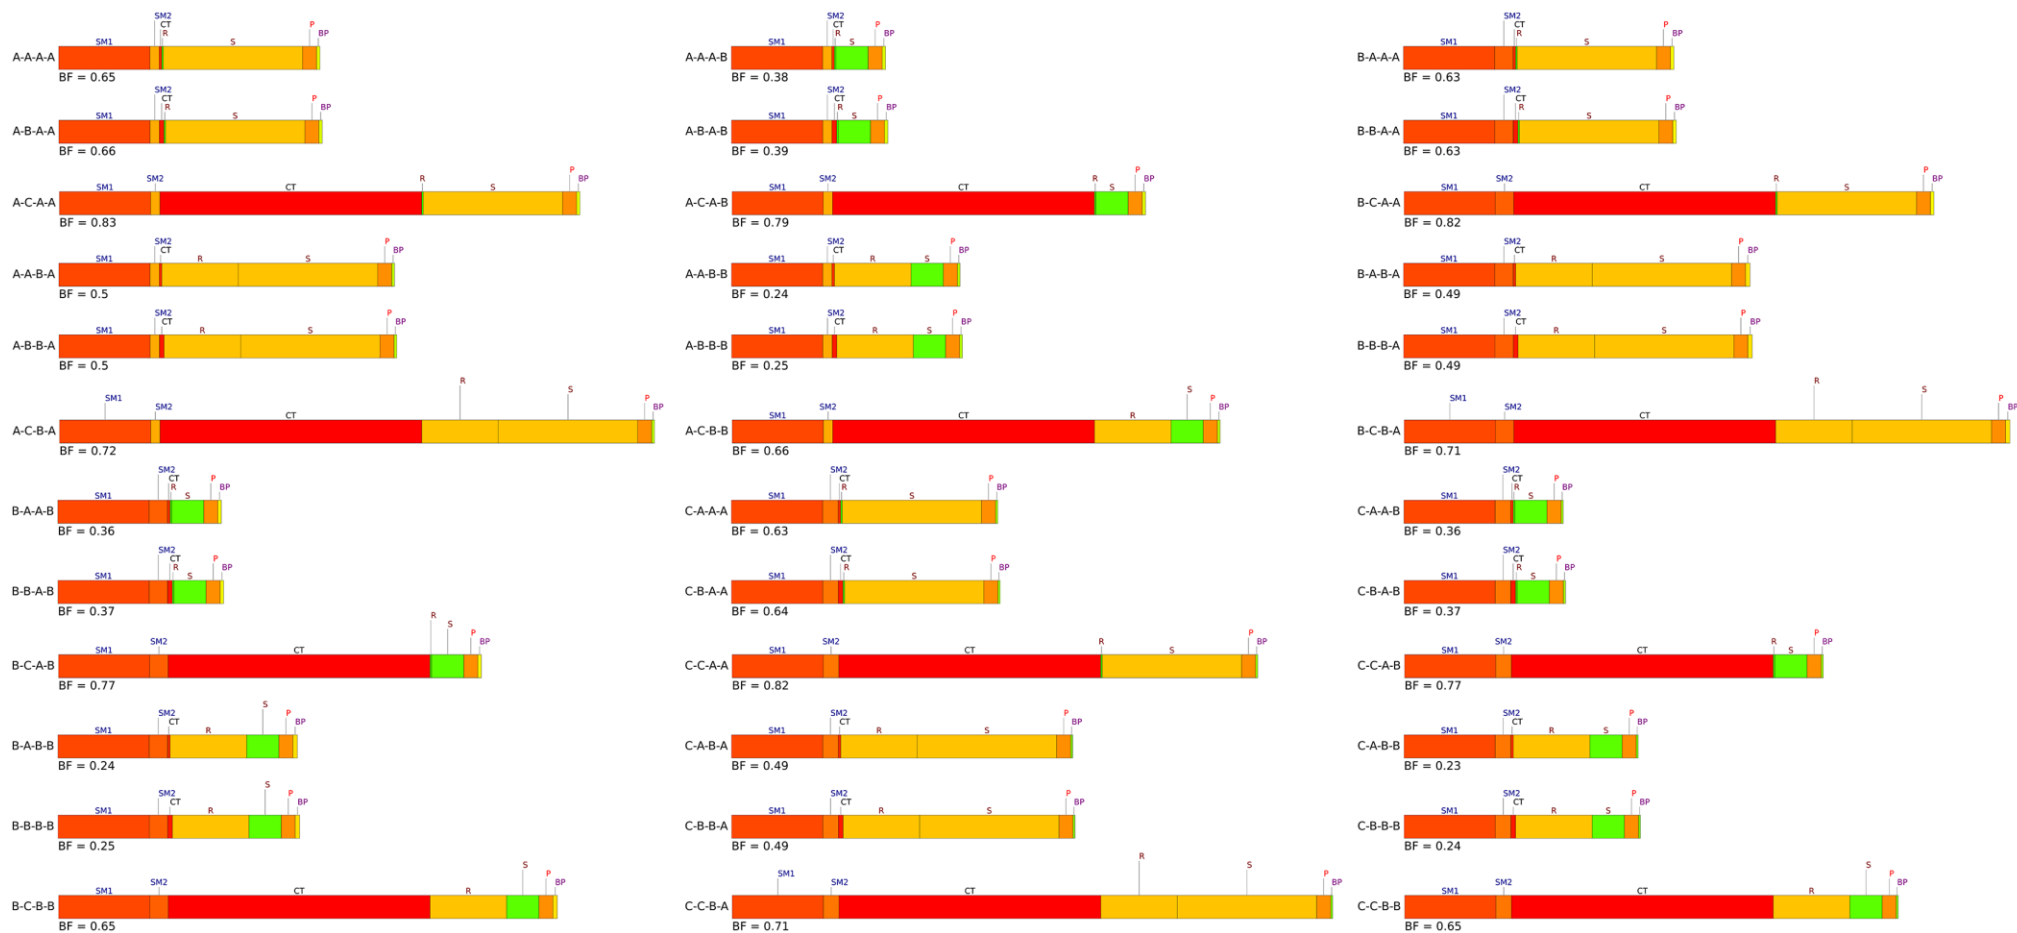

**Fig. S11.** bio-Strips of 36 synthetic routes for (*E*)-4-chloro-4'-nitrostilbene (based on 24-h  $CC_{50}$  values measured in FRSN cells). The 1<sup>st</sup>, 2<sup>nd</sup>, 3<sup>rd</sup>, and 4<sup>th</sup> letters in the reaction names correspond to the types of starting material (SM2: 1-iodo-4-nitrobenzene (A), 1-bromo-4-nitrobenzene (B), or 1-chloro-4-nitrobenzene (C)), catalyst (CT:  $Pd(OAc)_2$  (A),  $PdCl_2$  (B), or  $Pd(acac)_2$  (C)), base (R:  $Et_3N$  (A) or  $Et_2NH$  (B)), and solvent (S: DMF (A) or NMP (B)), respectively. The color of the strip sections corresponds to the  $CC_{50}$  of a particular substance in FRSN cells (see the cytotoxicity scale above the bio-Strips). bio-Factors are shown below the strips.

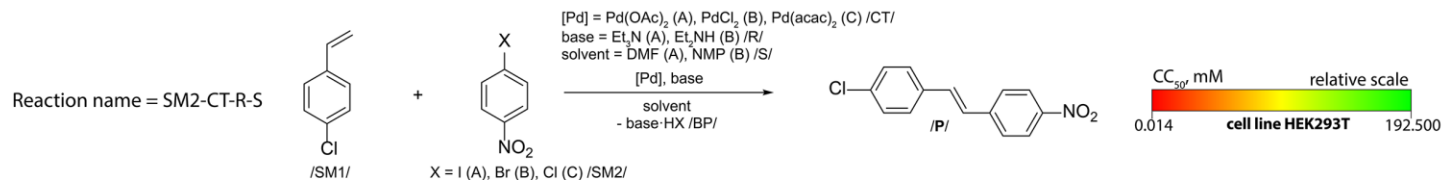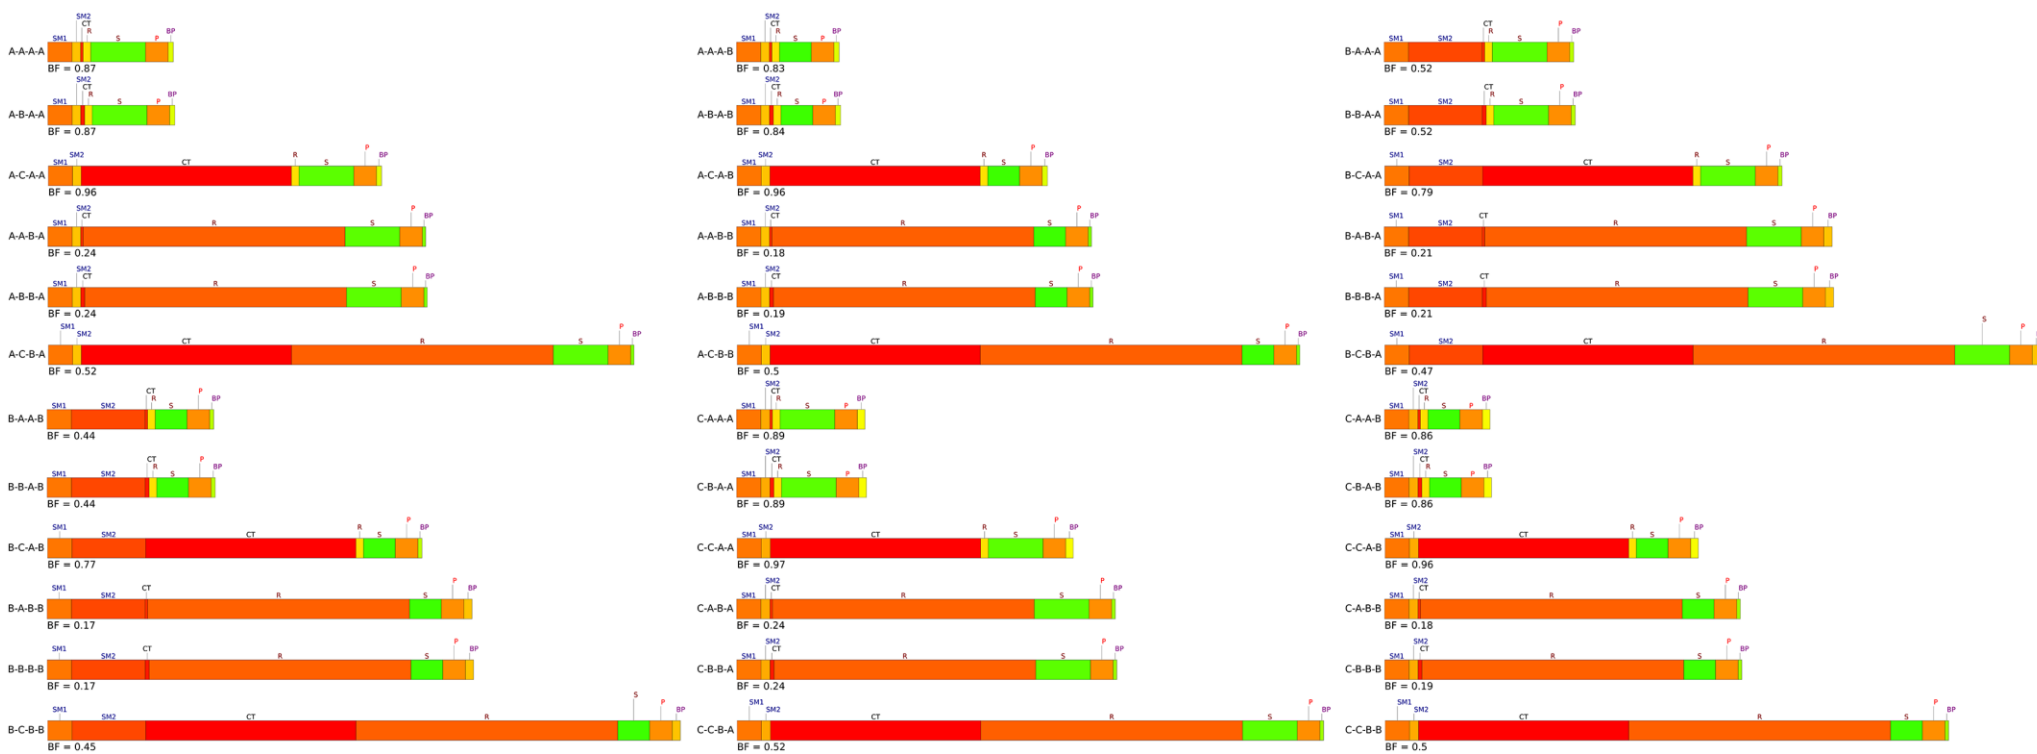

**Fig. S12.** bio-Strips of 36 synthetic routes for (E)-4-chloro-4'-nitrostilbene (based on 24-h  $CC_{50}$  values measured in HEK293T cells). The 1<sup>st</sup>, 2<sup>nd</sup>, 3<sup>rd</sup>, and 4<sup>th</sup> letters in the reaction names correspond to the types of starting material (SM2: 1-iodo-4-nitrobenzene (A), 1-bromo-4-nitrobenzene (B), or 1-chloro-4-nitrobenzene (C)), catalyst (CT:  $Pd(OAc)_2$  (A),  $PdCl_2$  (B), or  $Pd(acac)_2$  (C)), base (R:  $Et_3N$  (A) or  $Et_2NH$  (B)), and solvent (S: DMF (A) or NMP (B)), respectively. The color of the strip sections corresponds to the  $CC_{50}$  of a particular substance in HEK293T cells (see the cytotoxicity scale above the bio-Strips). bio-Factors are shown below the strips.

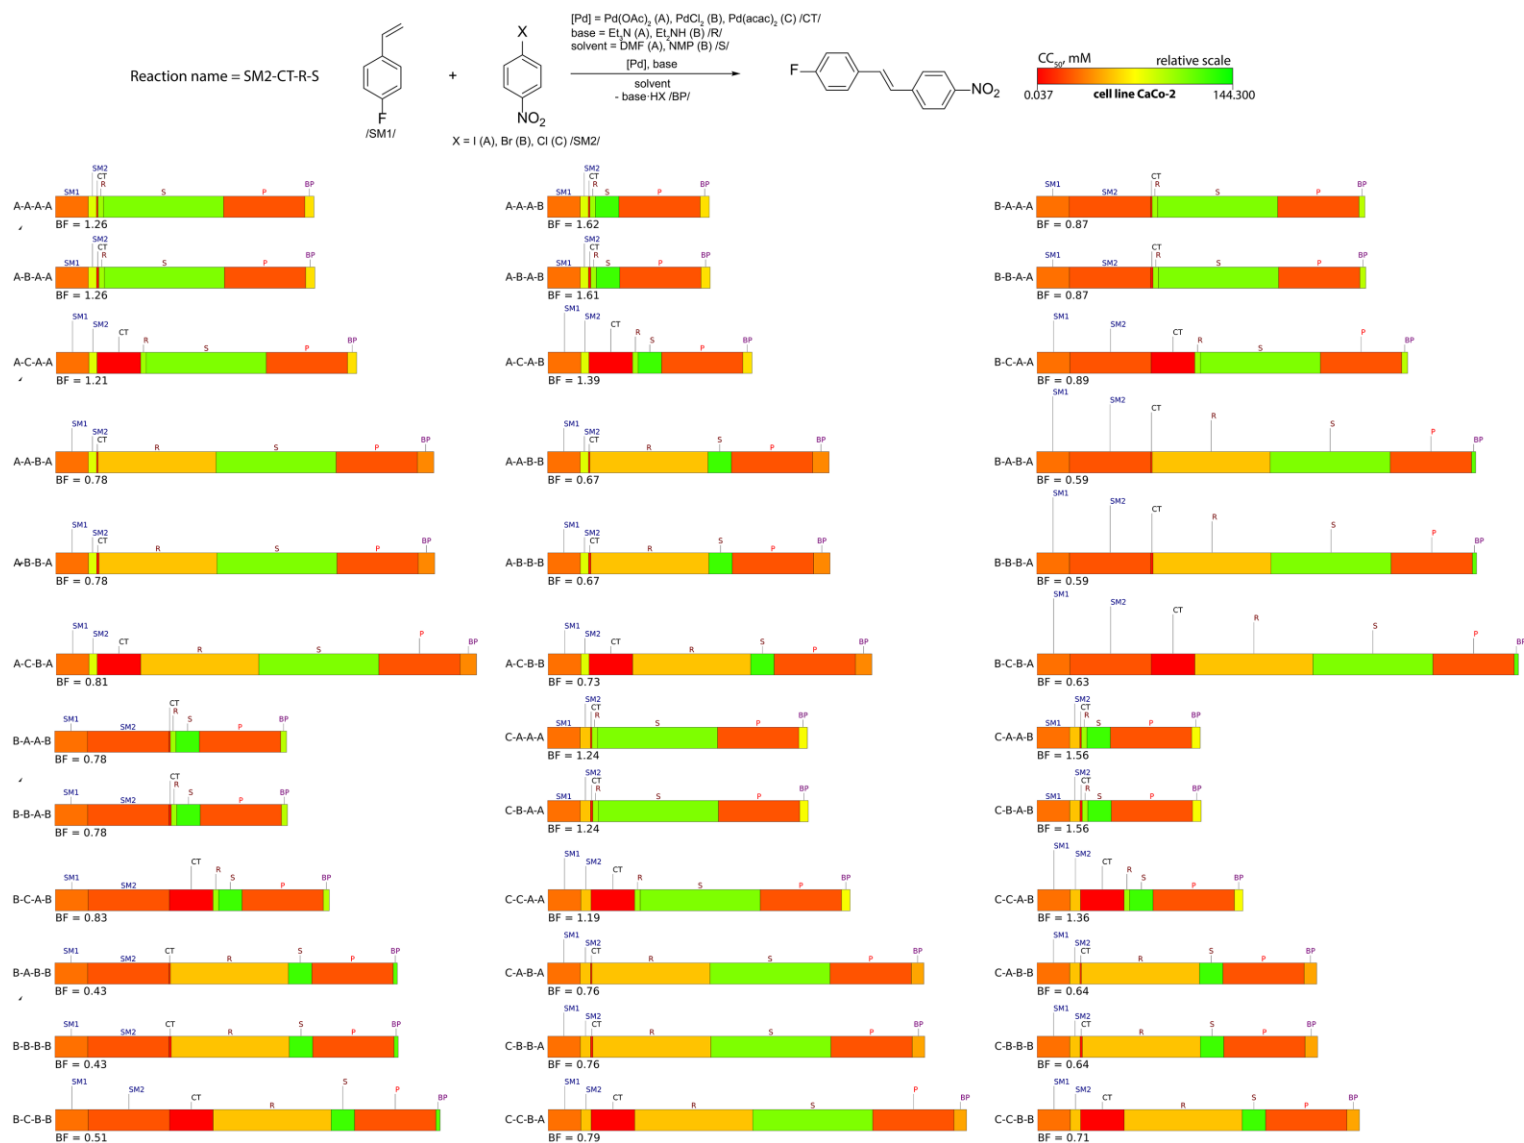

**Fig. S13.** bio-Strips of 36 synthetic routes for (*E*)-4-fluoro-4'-nitrostilbene (based on 24-h CC<sub>50</sub> values measured in CaCo-2 cells). The 1<sup>st</sup>, 2<sup>nd</sup>, 3<sup>rd</sup>, and 4<sup>th</sup> letters in the reaction names correspond to the types of starting material (SM2: 1-iodo-4-nitrobenzene (A), 1-bromo-4-nitrobenzene (B), or 1-chloro-4-nitrobenzene (C)), catalyst (CT: Pd(OAc)<sub>2</sub> (A), PdCl<sub>2</sub> (B), or Pd(acac)<sub>2</sub> (C)), base (R: Et<sub>3</sub>N (A) or Et<sub>2</sub>NH (B)), and solvent (S: DMF (A) or NMP (B)), respectively. The color of the strip sections corresponds to the CC<sub>50</sub> of a particular substance in CaCo-2 cells (see the cytotoxicity scale above the bio-Strips). bio-Factors are shown below the strips.

Reaction name = SM2-CT-R-S

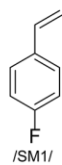

+

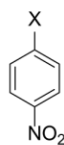

X = I (A), Br (B), Cl (C) /SM2/

[Pd] = Pd(OAc)<sub>2</sub> (A), PdCl<sub>2</sub> (B), Pd(acac)<sub>2</sub> (C) /CT/

base = Et<sub>3</sub>N (A), Et<sub>2</sub>NH (B) /R/

solvent = DMF (A), NMP (B) /S/

[Pd], base

solvent

- base-HX /BP/

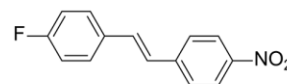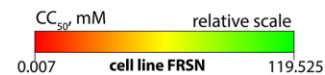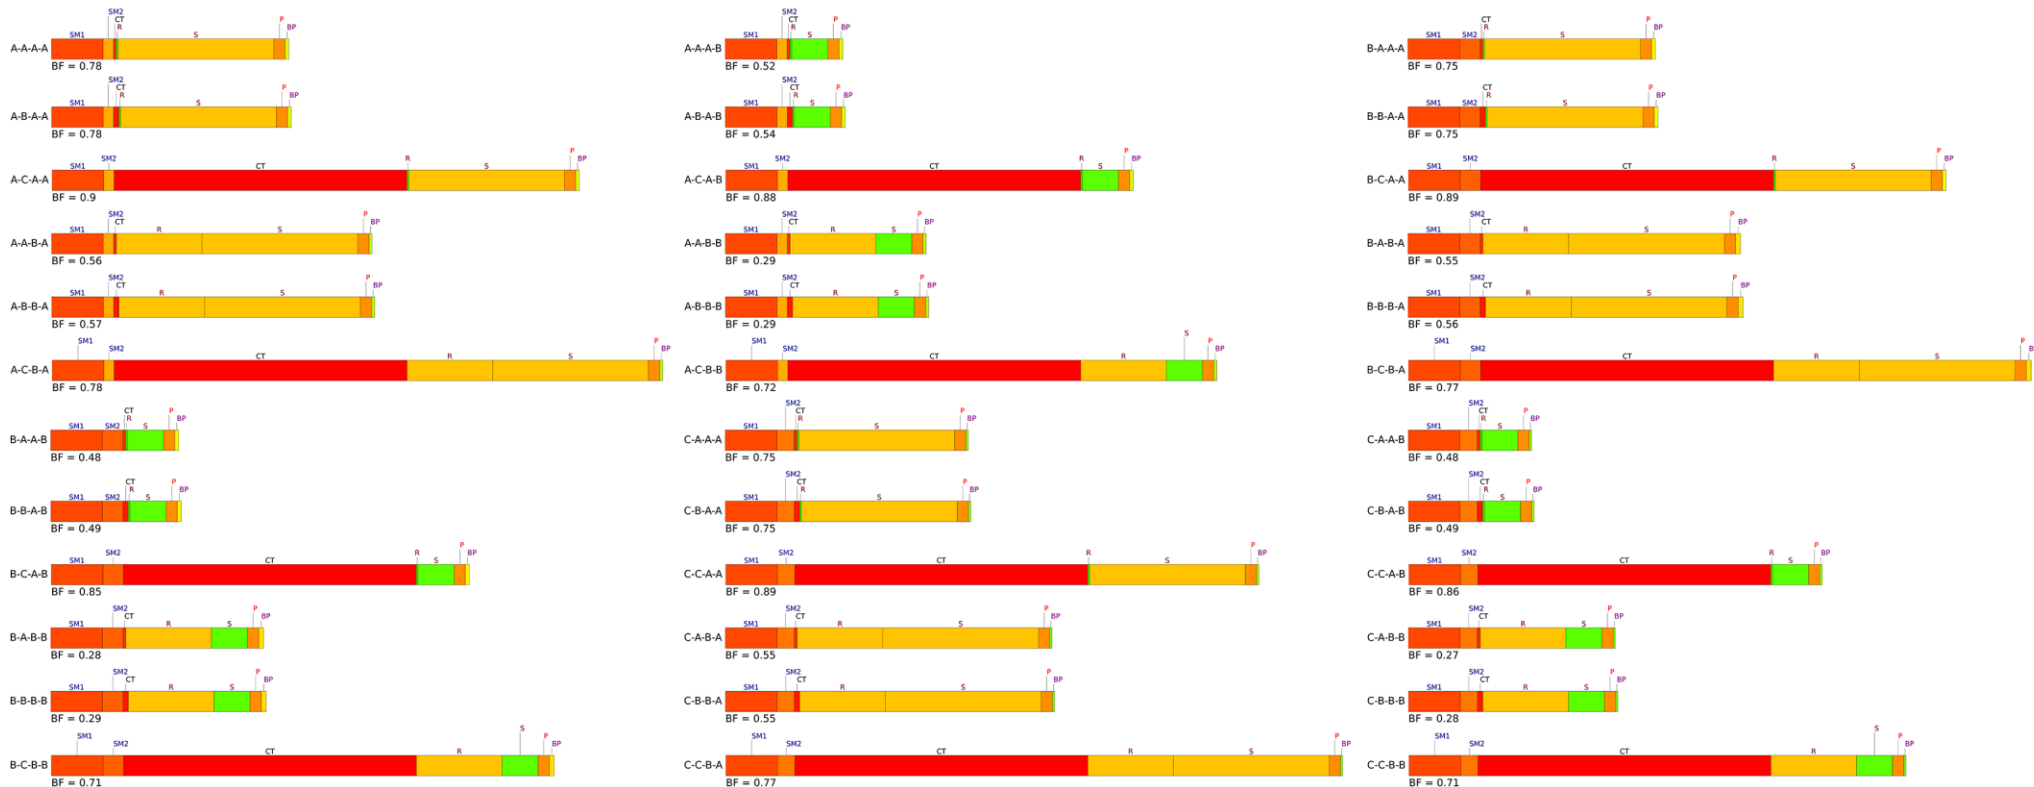

**Fig. S14.** bio-Strips of 36 synthetic routes for (*E*)-4-fluoro-4'-nitrostilbene (based on 24-h CC<sub>50</sub> values measured in FRSN cells). The 1<sup>st</sup>, 2<sup>nd</sup>, 3<sup>rd</sup>, and 4<sup>th</sup> letters in the reaction names correspond to the types of starting material (SM2: 1-iodo-4-nitrobenzene (A), 1-bromo-4-nitrobenzene (B), or 1-chloro-4-nitrobenzene (C)), catalyst (CT: Pd(OAc)<sub>2</sub> (A), PdCl<sub>2</sub> (B), or Pd(acac)<sub>2</sub> (C)), base (R: Et<sub>3</sub>N (A) or Et<sub>2</sub>NH (B)), and solvent (S: DMF (A) or NMP (B)), respectively. The color of the strip sections corresponds to the CC<sub>50</sub> of a particular substance in FRSN cells (see the cytotoxicity scale above the bio-Strips). bio-Factors are shown below the strips.



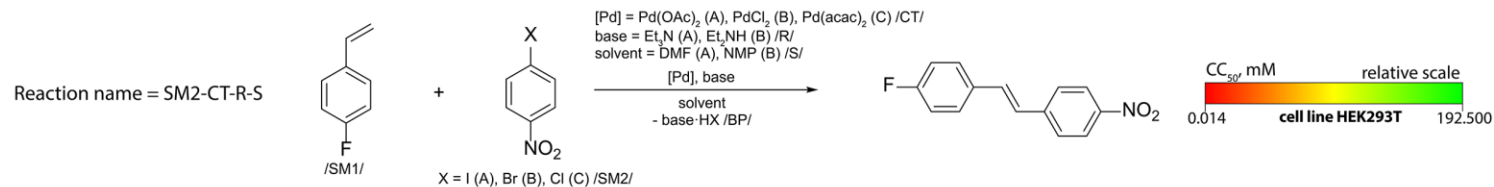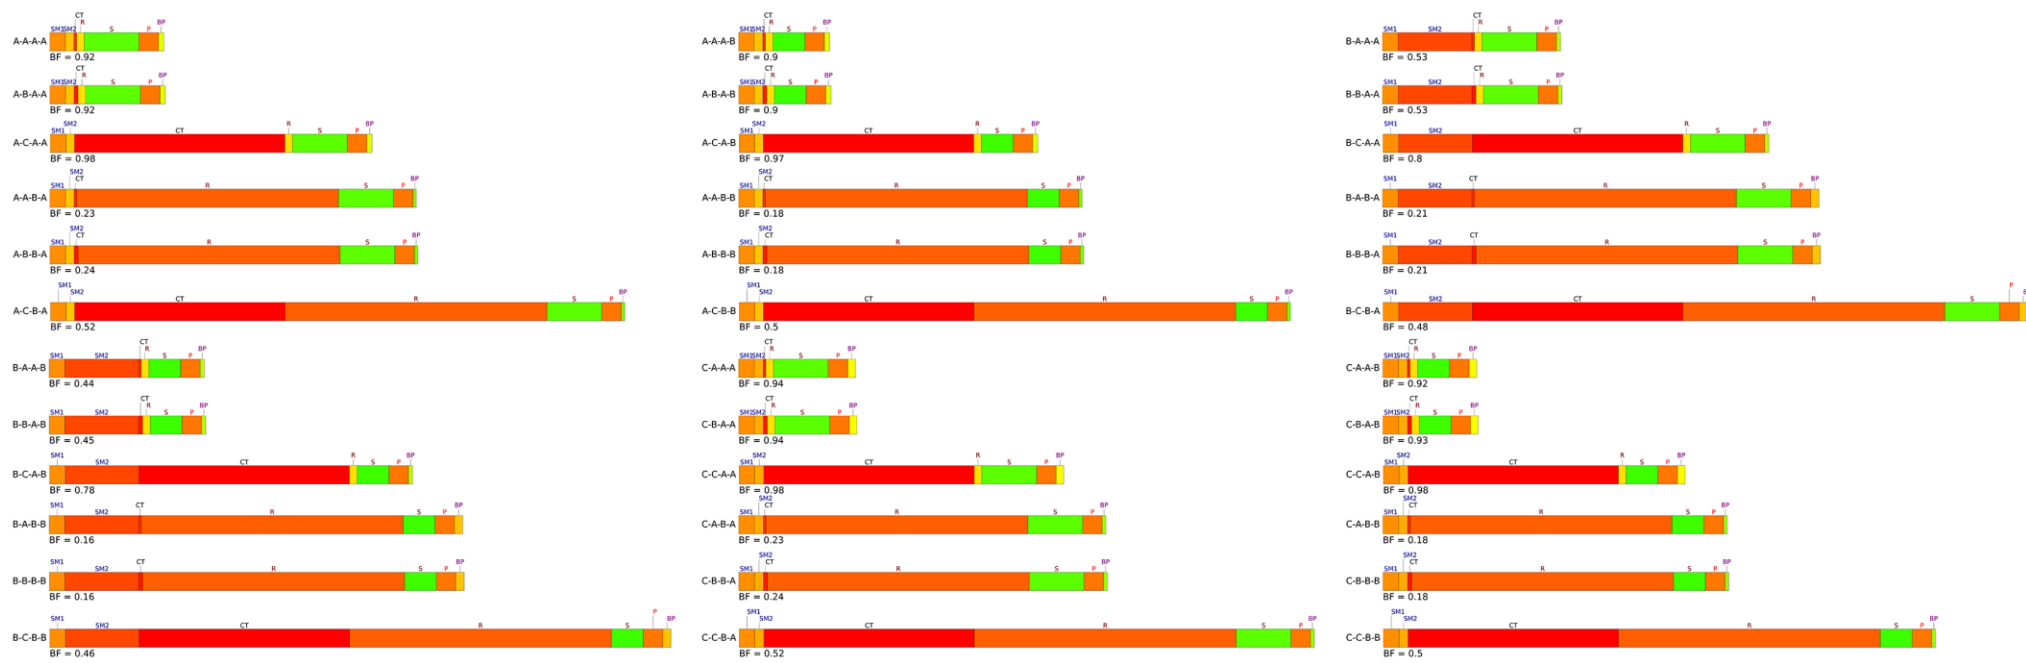

**Fig. S15.** bio-Strips of 36 synthetic routes for (*E*)-4-fluoro-4'-nitrostilbene (based on 24-h  $CC_{50}$  values measured in HEK293T cells). The 1<sup>st</sup>, 2<sup>nd</sup>, 3<sup>rd</sup>, and 4<sup>th</sup> letters in the reaction names correspond to the types of starting material (SM2: 1-iodo-4-nitrobenzene (A), 1-bromo-4-nitrobenzene (B), or 1-chloro-4-nitrobenzene (C)), catalyst (CT:  $Pd(OAc)_2$  (A),  $PdCl_2$  (B), or  $Pd(acac)_2$  (C)), base (R:  $Et_3N$  (A) or  $Et_2NH$  (B)), and solvent (S: DMF (A) or NMP (B)), respectively. The color of the strip sections corresponds to the  $CC_{50}$  of a particular substance in HEK293T cells (see the cytotoxicity scale above the bio-Strips). bio-Factors are shown below the strips.

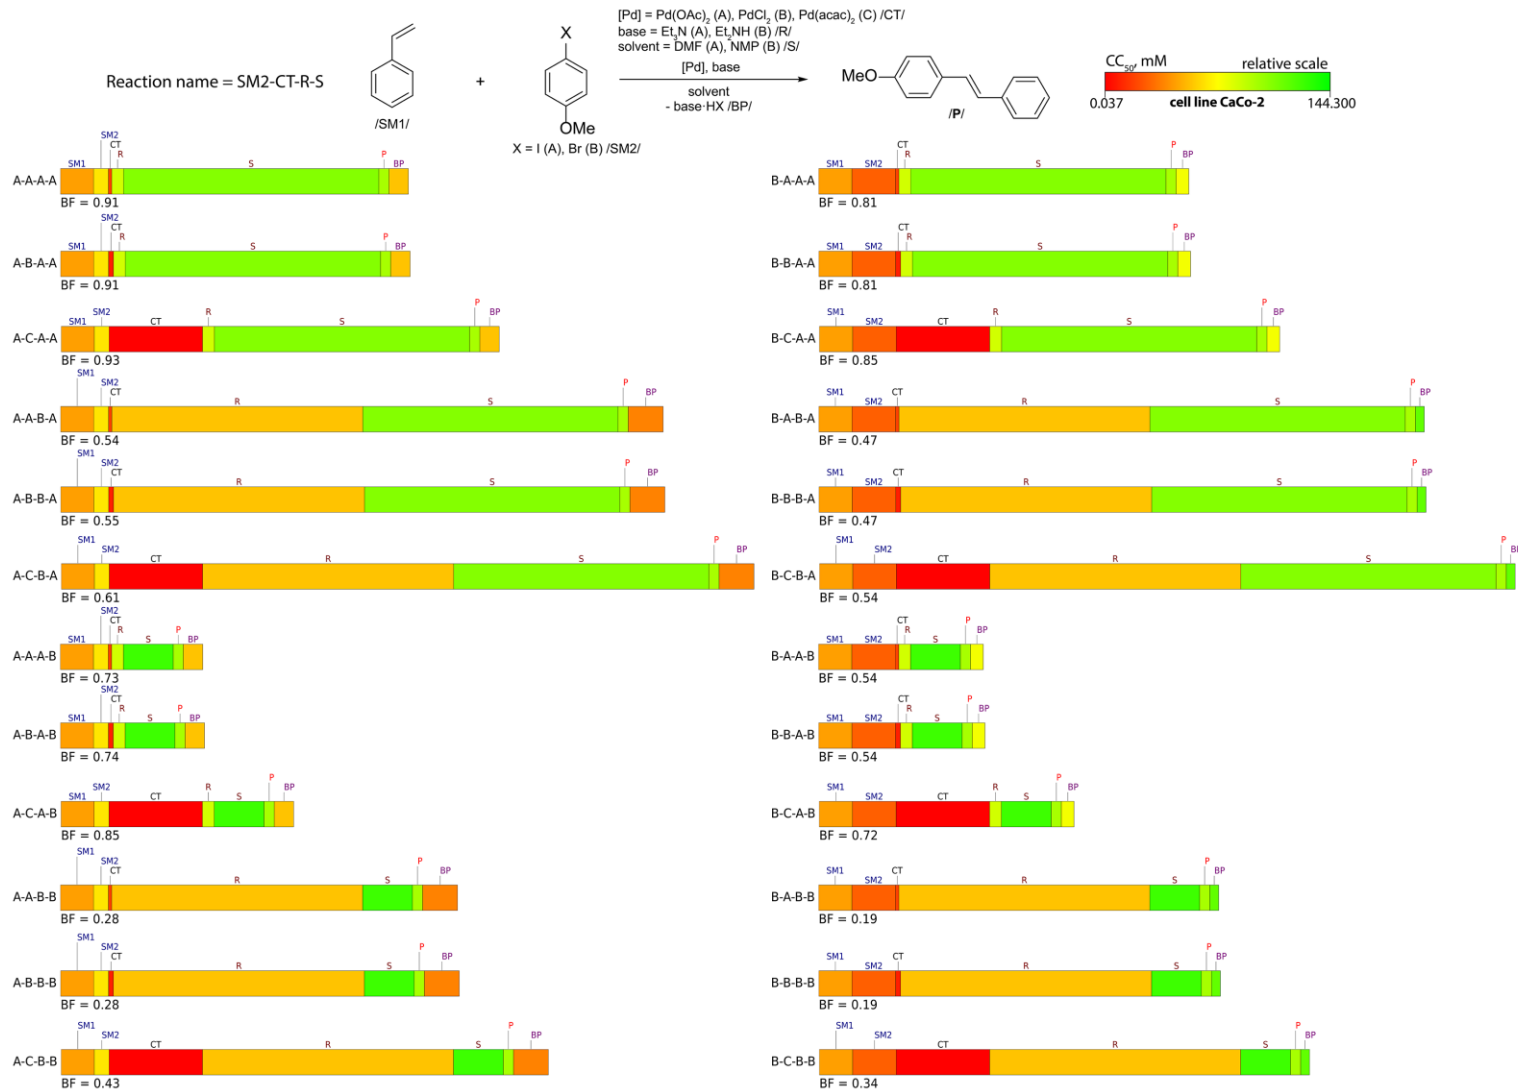

**Fig. S16.** bio-Strips of 24 synthetic routes for (*E*)-4-methoxystilbene (based on 24-h  $CC_{50}$  values measured in CaCo-2 cells). The 1<sup>st</sup>, 2<sup>nd</sup>, 3<sup>rd</sup>, and 4<sup>th</sup> letters in the reaction names correspond to the types of starting material (SM2: 1-iodo-4-methoxybenzene (A) or 1-bromo-4-methoxybenzene (B)), catalyst (CT:  $Pd(OAc)_2$  (A),  $PdCl_2$  (B), or  $Pd(acac)_2$  (C)), base (R:  $Et_3N$  (A) or  $Et_2NH$  (B)), and solvent (S: DMF (A) or NMP (B)), respectively). The color of the strip sections corresponds to the  $CC_{50}$  of a particular substance in CaCo-2 cells (see the cytotoxicity scale above the bio-Strips). bio-Factors are shown below the strips.

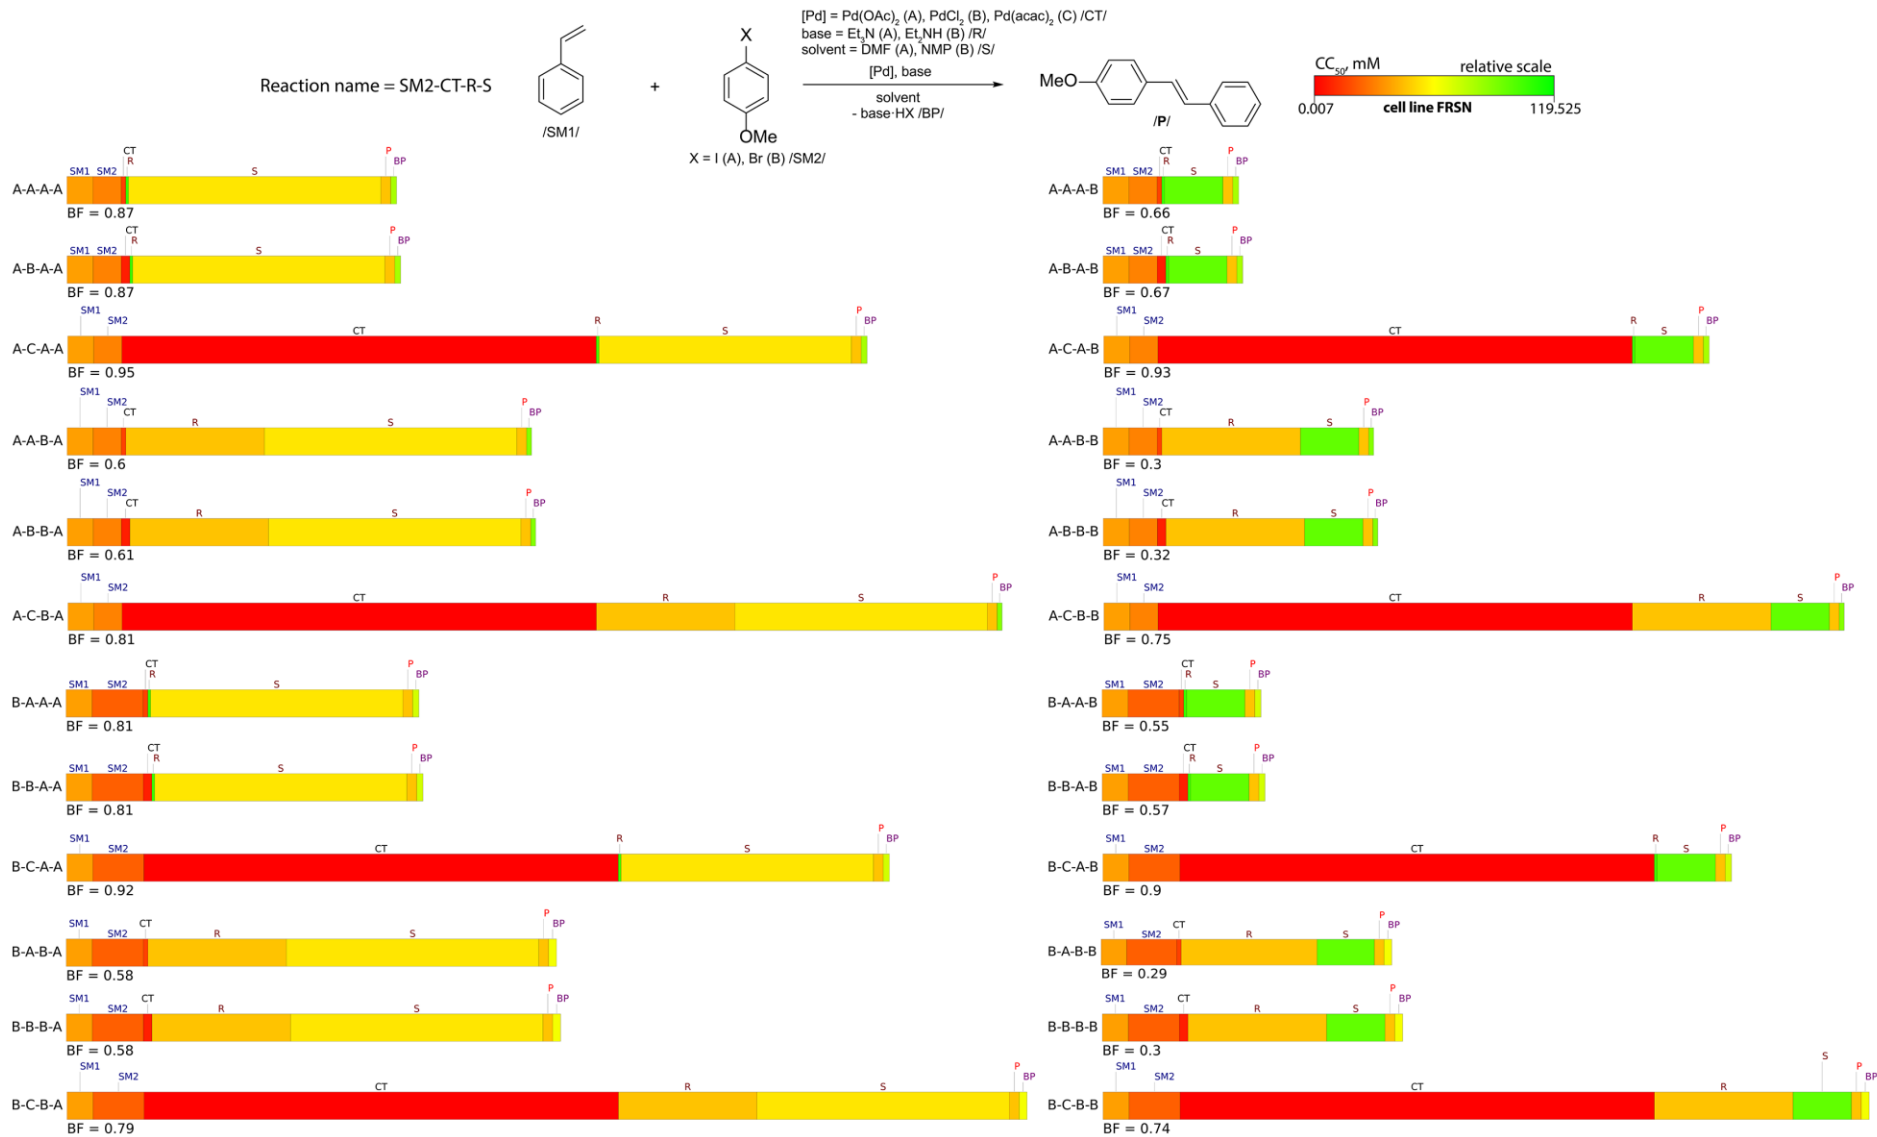

**Fig. S17.** bio-Strips of 24 synthetic routes for (E)-4-methoxystilbene (based on 24-h CC<sub>50</sub> values measured in FRSN cells). The 1<sup>st</sup>, 2<sup>nd</sup>, 3<sup>rd</sup>, and 4<sup>th</sup> letters in the reaction names correspond to the types of starting material (SM2: 1-iodo-4-methoxybenzene (A) or 1-bromo-4-methoxybenzene (B)), catalyst (CT: Pd(OAc)<sub>2</sub> (A), PdCl<sub>2</sub> (B), or Pd(acac)<sub>2</sub> (C)), base (R: Et<sub>3</sub>N (A) or Et<sub>2</sub>NH (B)), and solvent (S: DMF (A) or NMP (B)), respectively. The color of the strip sections corresponds to the CC<sub>50</sub> of a particular substance in FRSN cells (see the cytotoxicity scale above the bio-Strips). bio-Factors are shown below the strips.

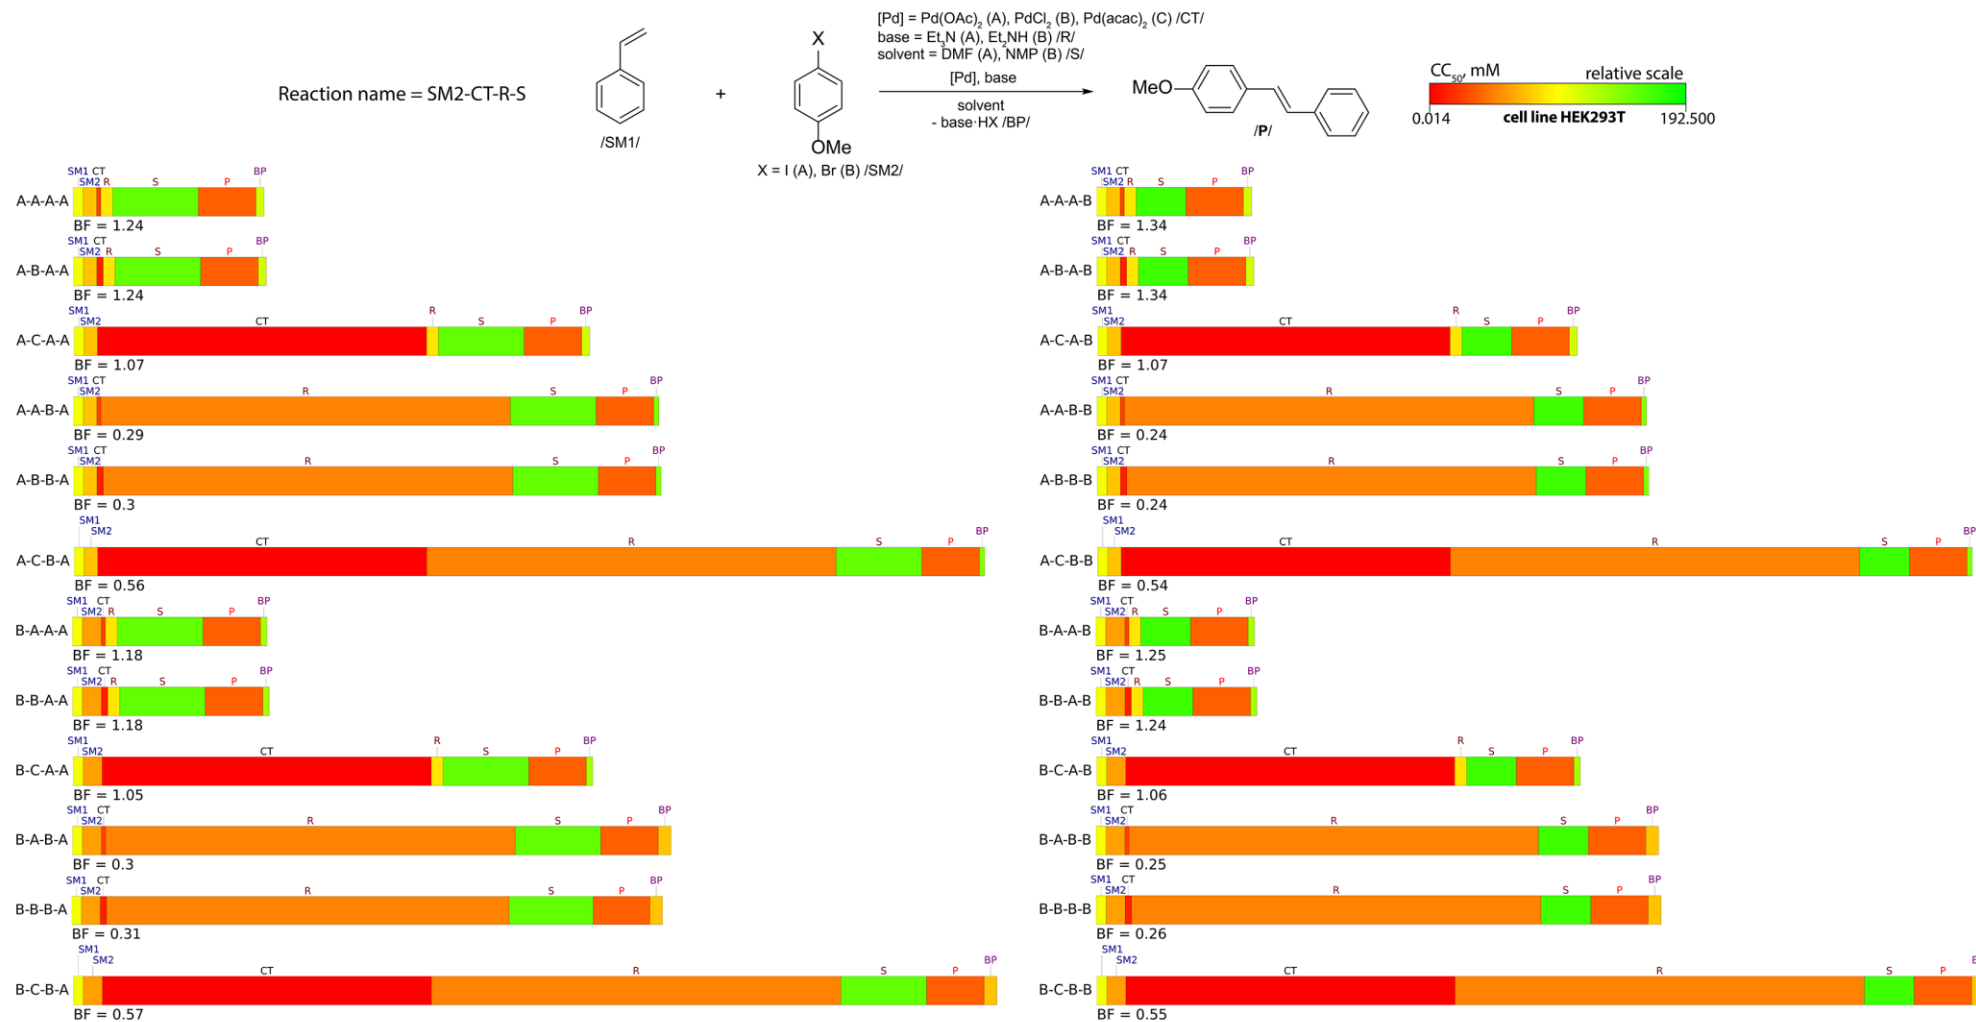

**Fig. S18.** bio-Strips of 24 synthetic routes for (*E*)-4-methoxystilbene (based on 24-h CC<sub>50</sub> values measured in HEK293T cells). The 1<sup>st</sup>, 2<sup>nd</sup>, 3<sup>rd</sup>, and 4<sup>th</sup> letters in the reaction names correspond to the types of starting material (SM2: 1-iodo-4-methoxybenzene (A) or 1-bromo-4-methoxybenzene (B)), catalyst (CT: Pd(OAc)<sub>2</sub> (A), PdCl<sub>2</sub> (B), or Pd(acac)<sub>2</sub> (C)), base (R: Et<sub>3</sub>N (A) or Et<sub>3</sub>NH (B)), and solvent (S: DMF (A) or NMP (B)), respectively. The color of the strip sections corresponds to the CC<sub>50</sub> of a particular substance in HEK293T cells (see the cytotoxicity scale above the bio-Strips). bio-Factors are shown below the strips.

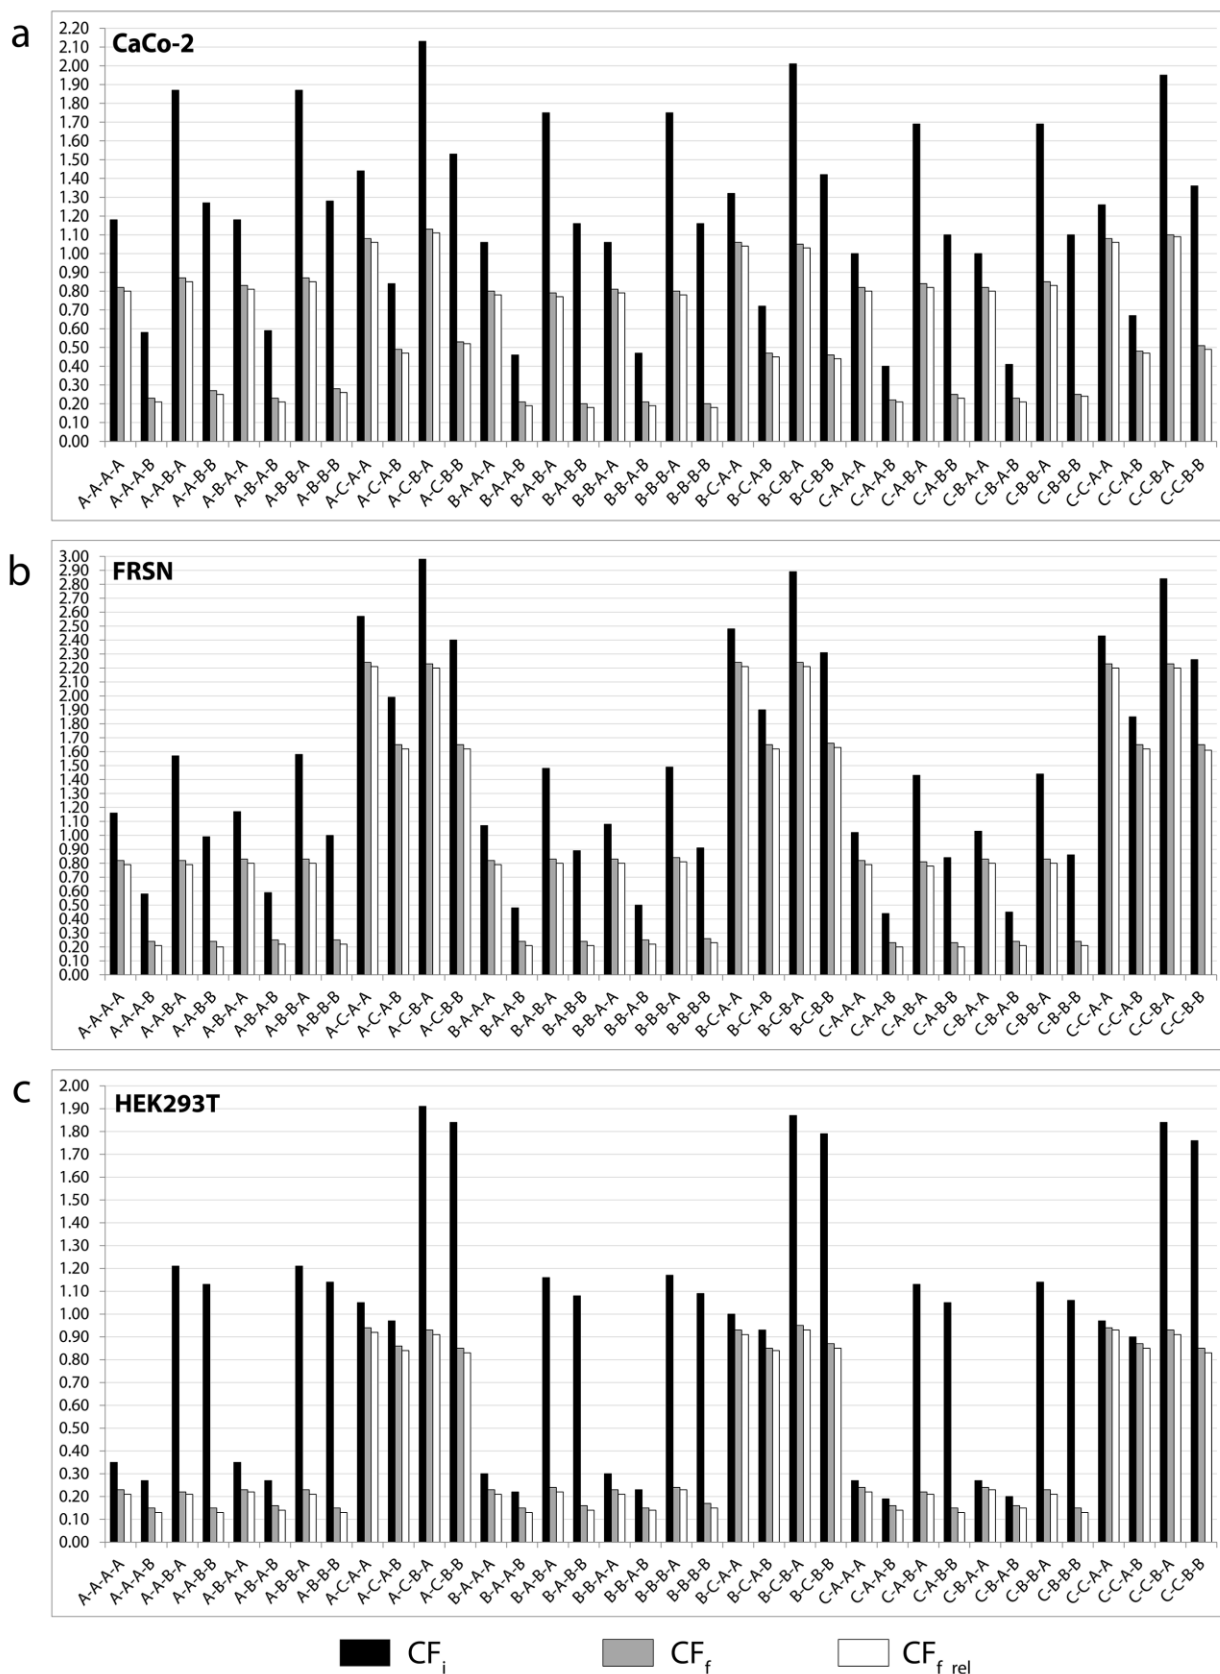

**Fig. S19.** Cytotoxicity potentials (CPs) of 32 routes of synthesis of (*E*)-stilbene on the basis of CC<sub>50</sub> values measured in (a) CaCo-2, (b) FRSN, and (c) HEK293T cells. Exact values are provided in Table S7.

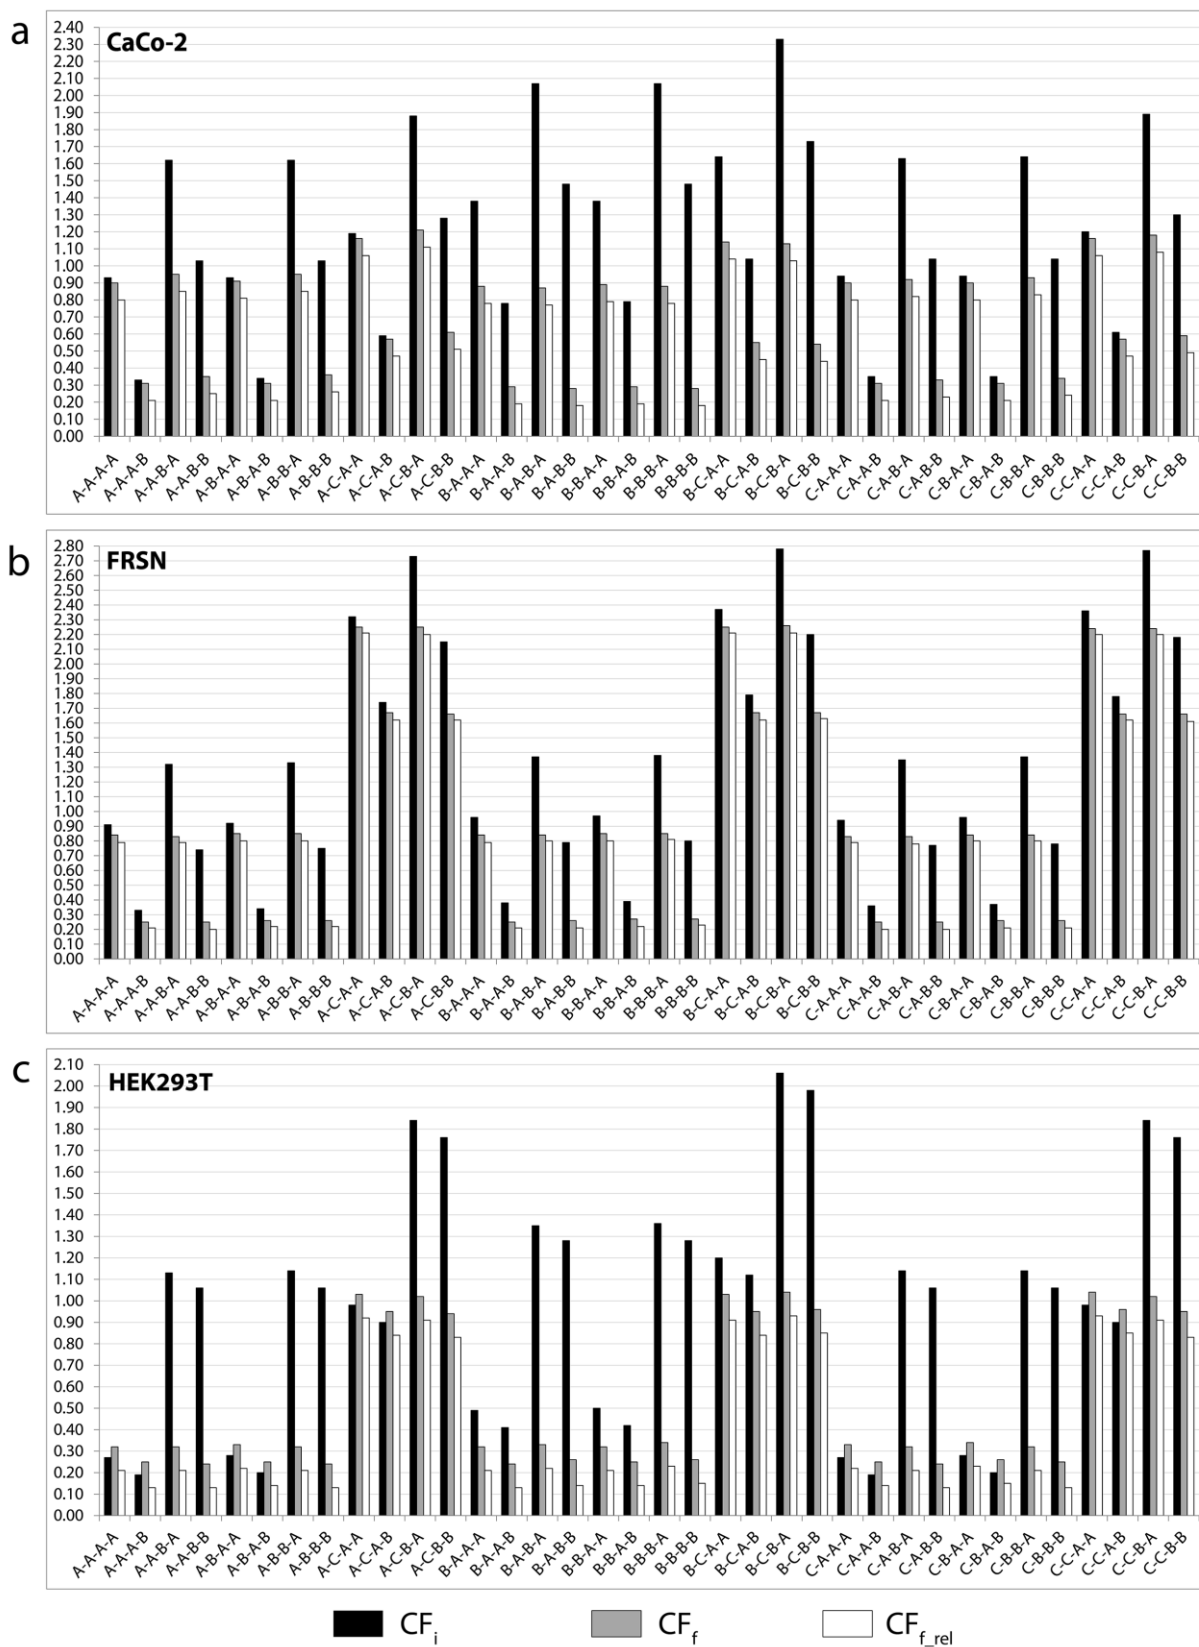

**Fig. S20.** Cytotoxicity potentials (CPs) of 32 routes of synthesis of (*E*)-4-nitrostilbene on the basis of  $CC_{50}$  values measured in (a) CaCo-2, (b) FRSN, and (c) HEK293T cells. Exact values are provided in Table S8.

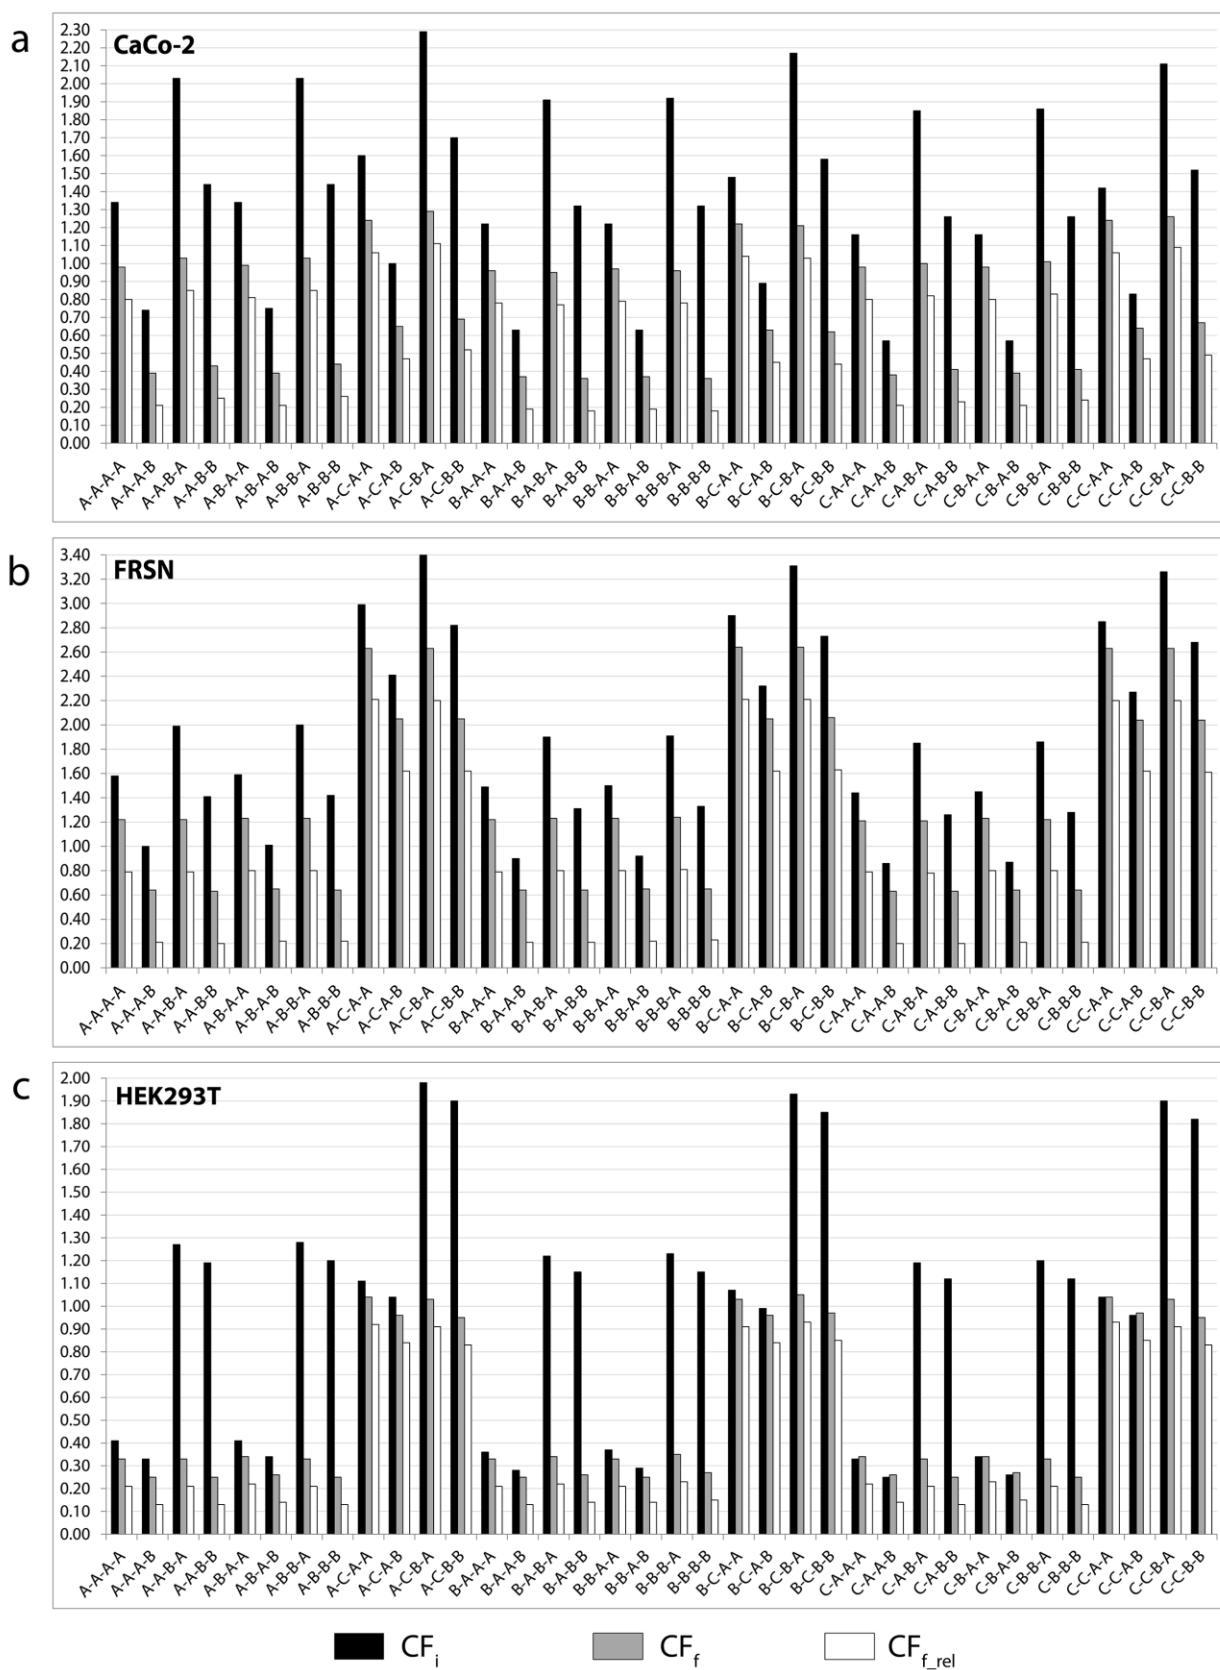

**Fig. S21.** Cytotoxicity potentials (CPs) of 32 routes of synthesis of (*E*)-4-chlorostilbene on the basis of  $CC_{50}$  values measured in (a) CaCo-2, (b) FRSN, and (c) HEK293T cells. Exact values are provided in Table S9.

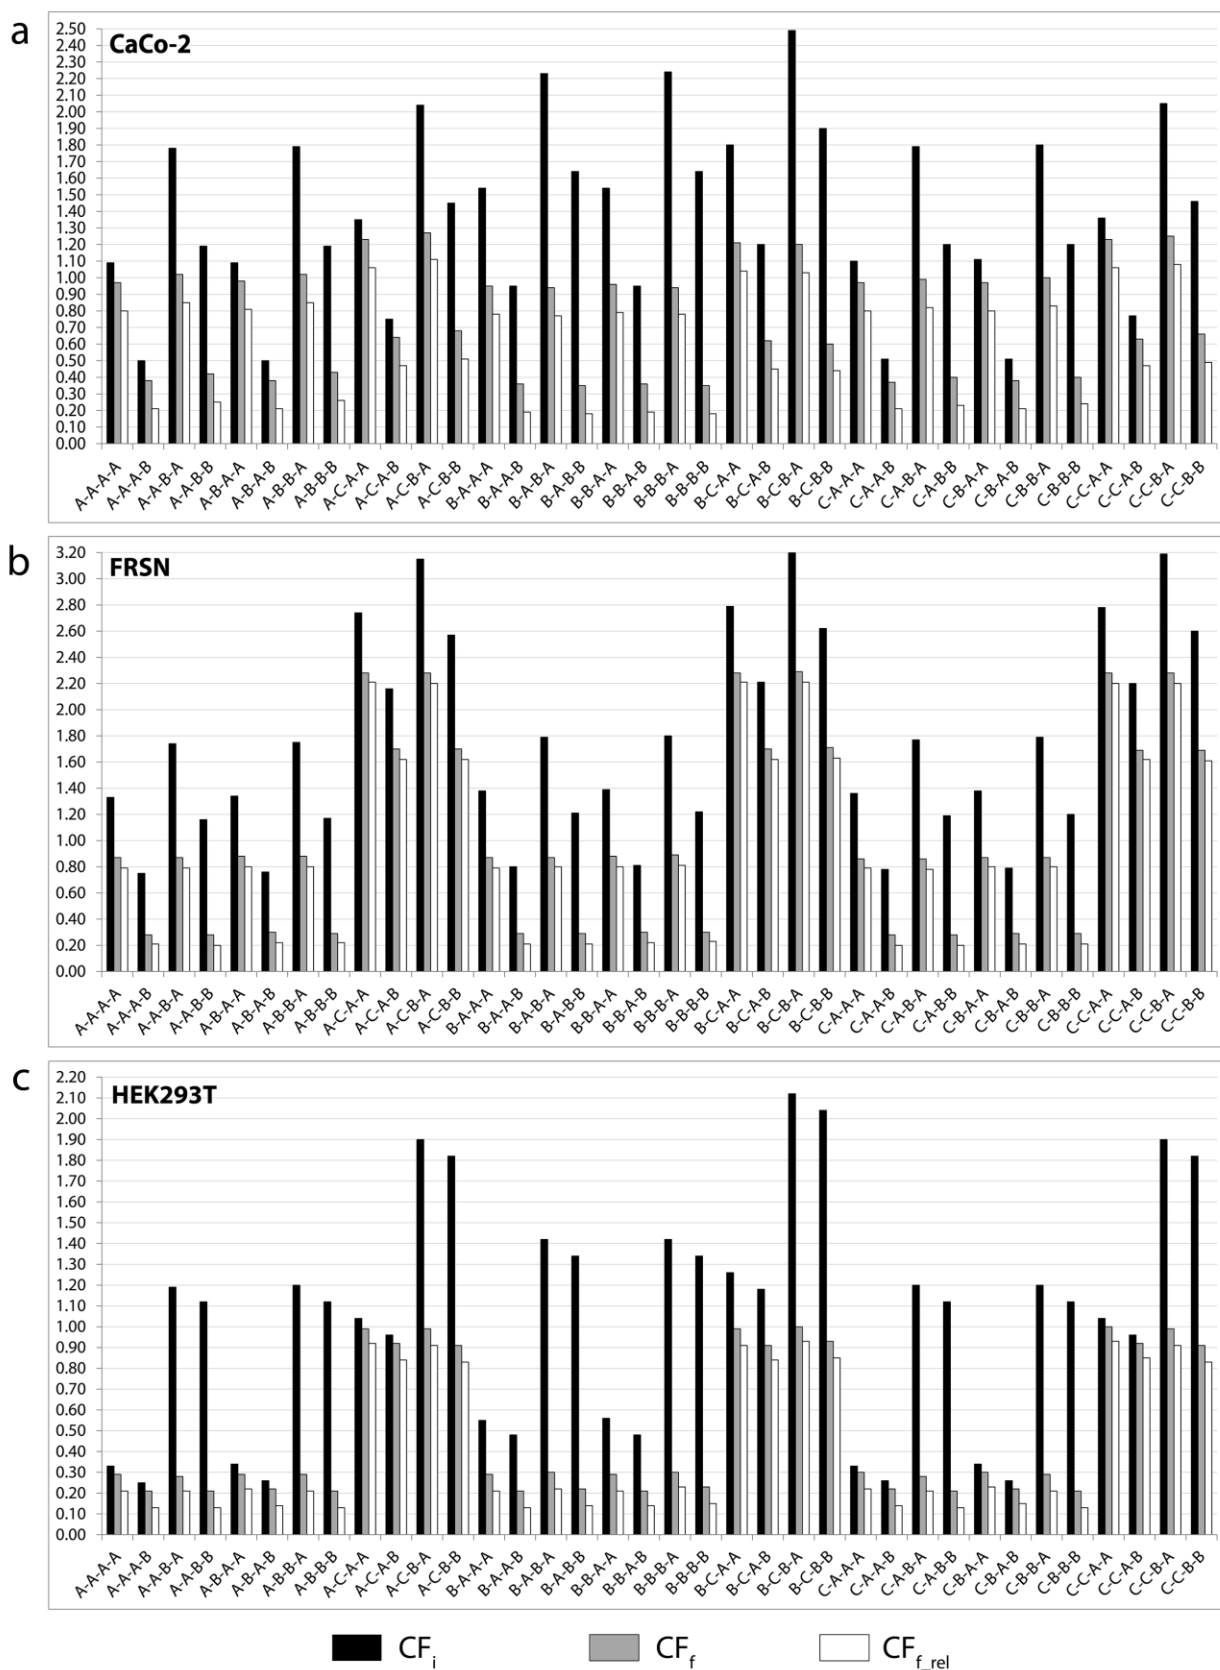

**Fig. S22.** Cytotoxicity potentials (CPs) of 32 routes of synthesis of (E)-4-chloro-4'-nitrostilbene on the basis of  $CC_{50}$  values measured in (a) CaCo-2, (b) FRSN, and (c) HEK293T cells. Exact values are provided in Table S10.



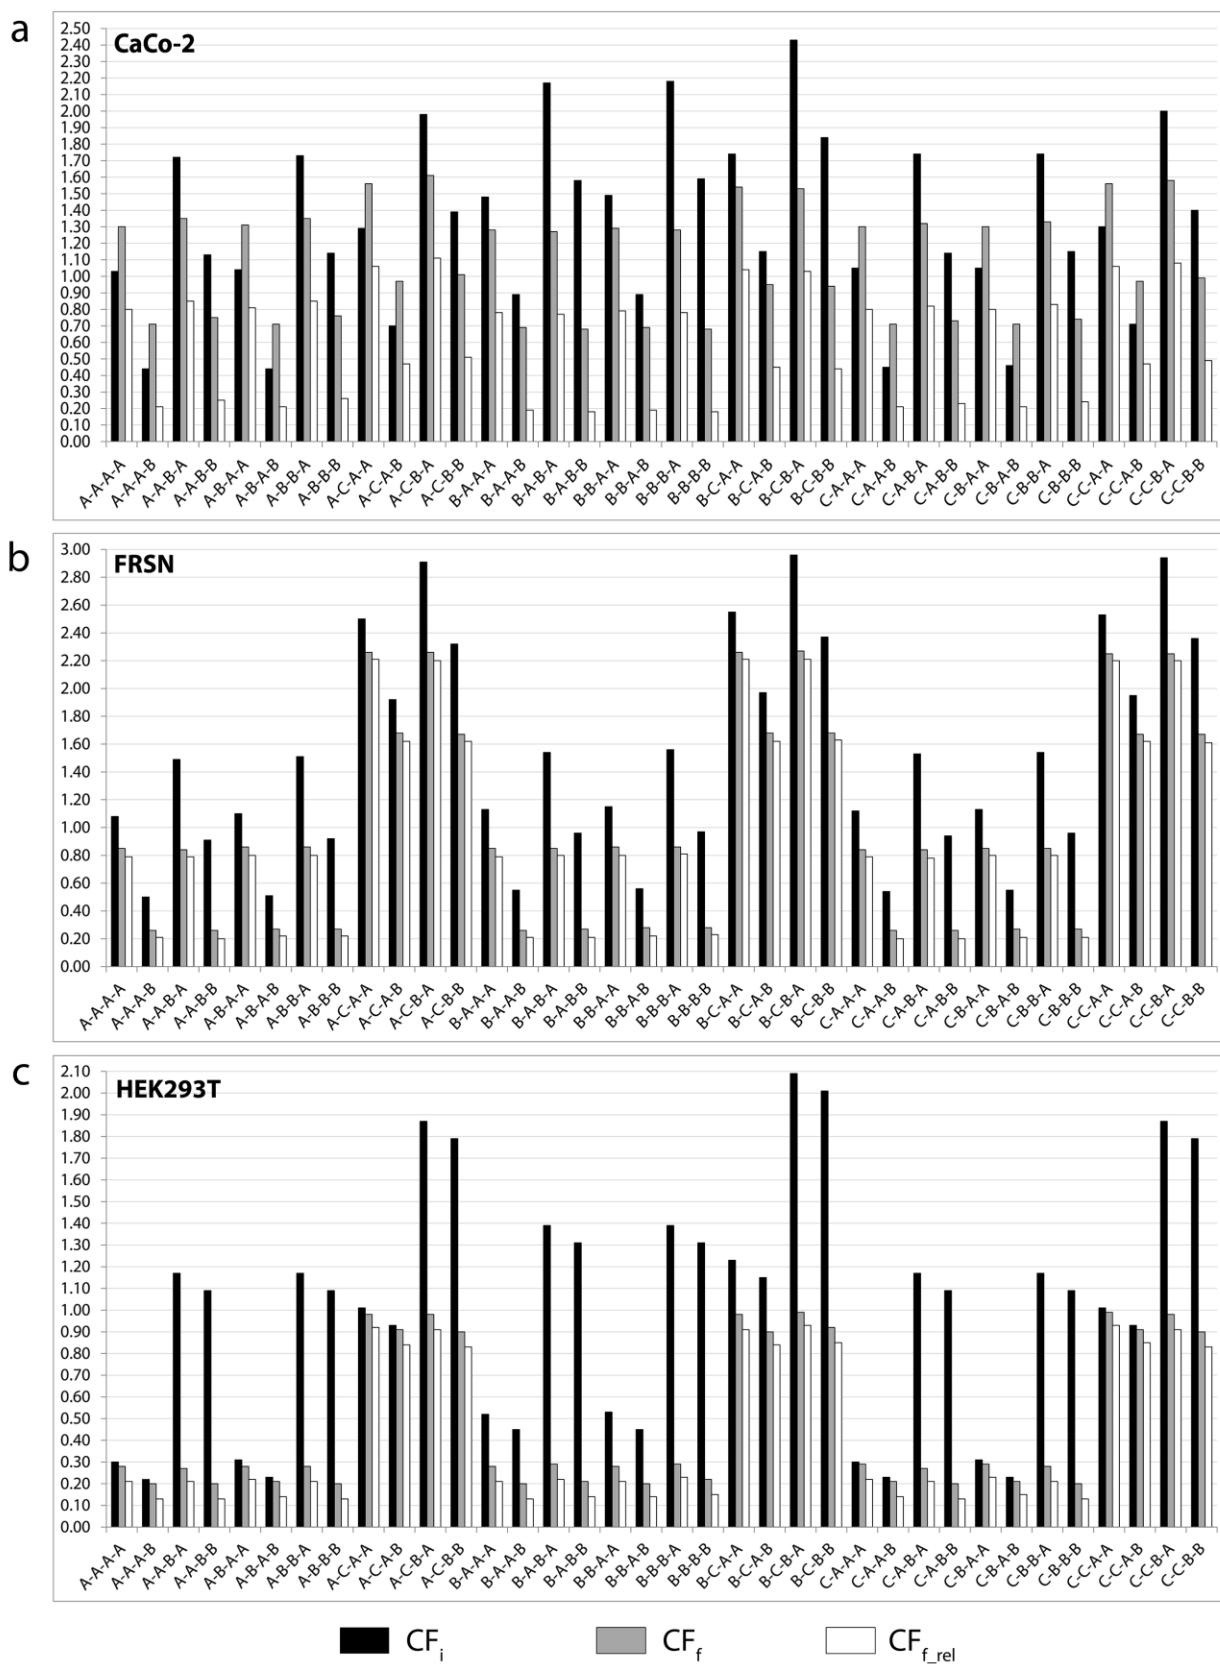

**Fig. S23.** Cytotoxicity potentials (CPs) of 32 routes of synthesis of (*E*)-4-fluoro-4'-nitrostilbene on the basis of  $CC_{50}$  values measured in (a) CaCo-2, (b) FRSN, and (c) HEK239T cells. Exact values are provided in Table S11.

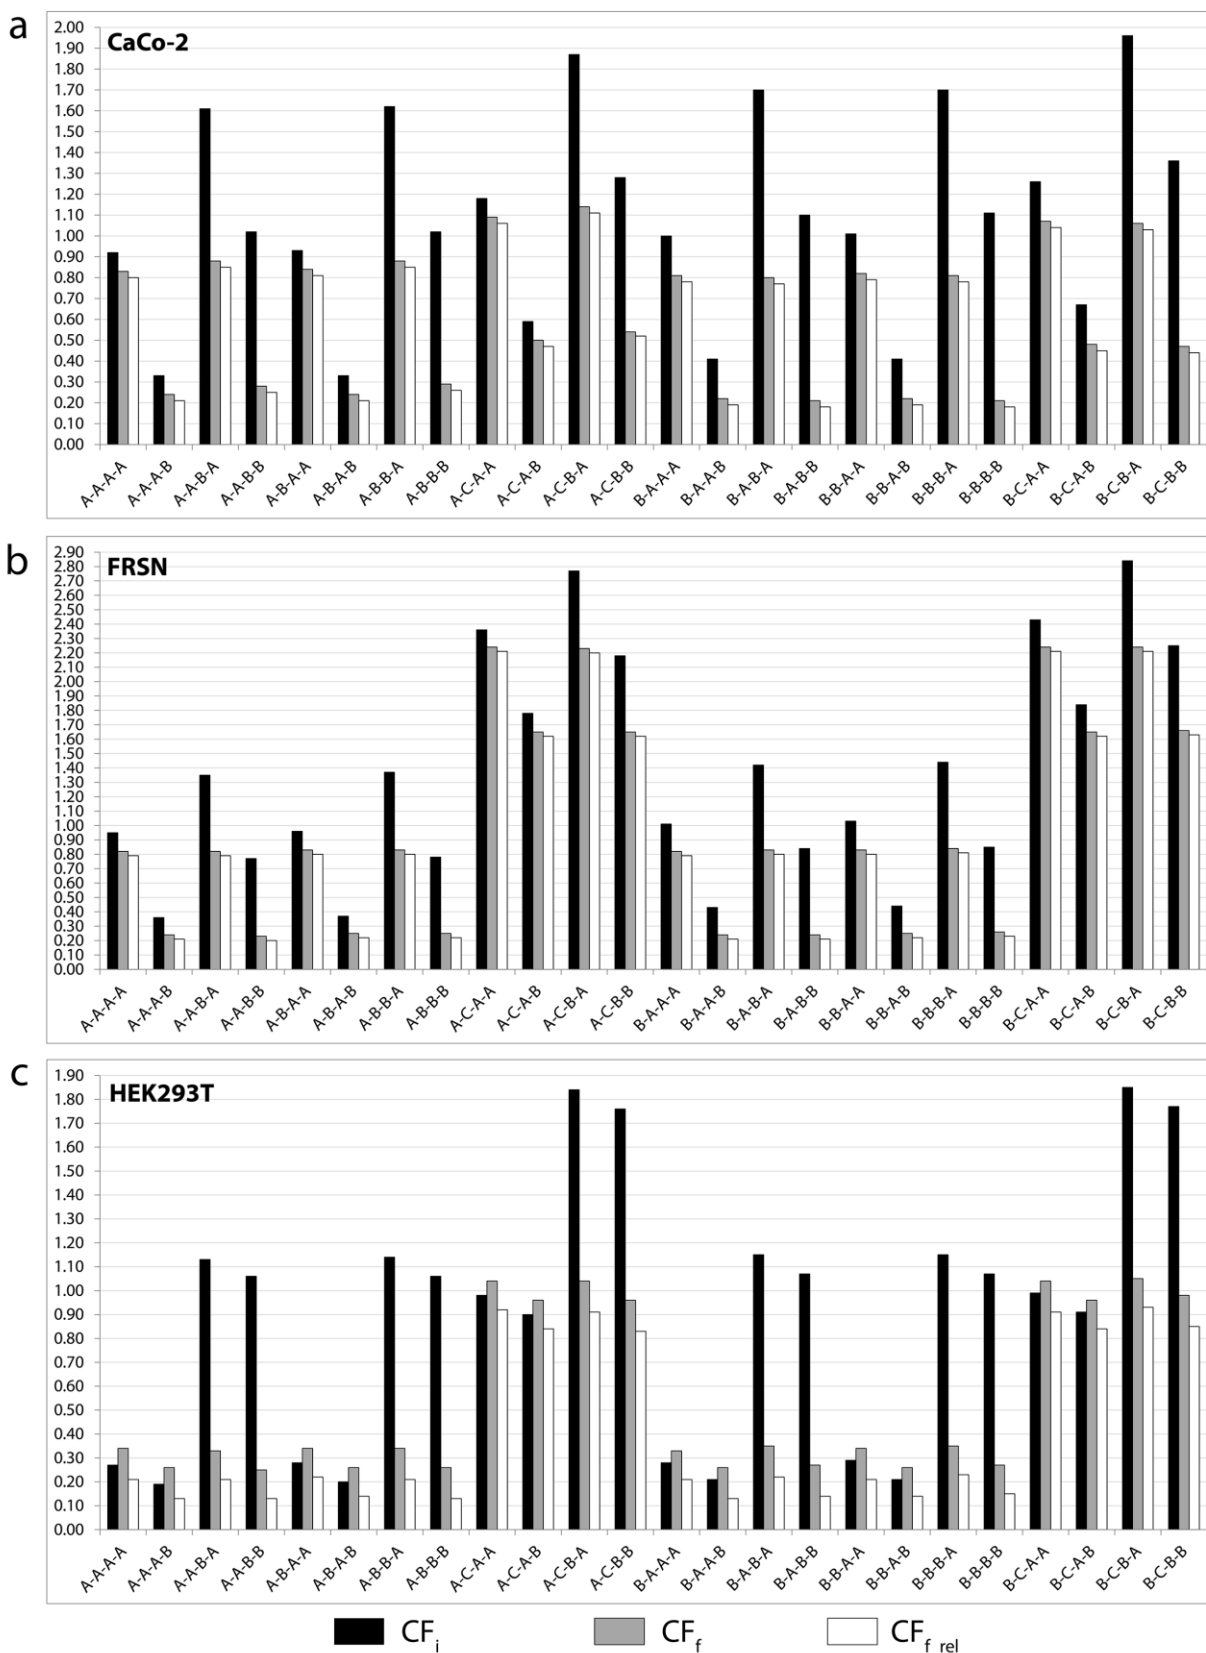

**Fig. S24.** Cytotoxicity potentials (CPs) of 24 routes of synthesis of (*E*)-4-methoxystilbene on the basis of  $CC_{50}$  values measured in (a) CaCo-2, (b) FRSN, and (c) HEK293T cells. Exact values are provided in Table S12.

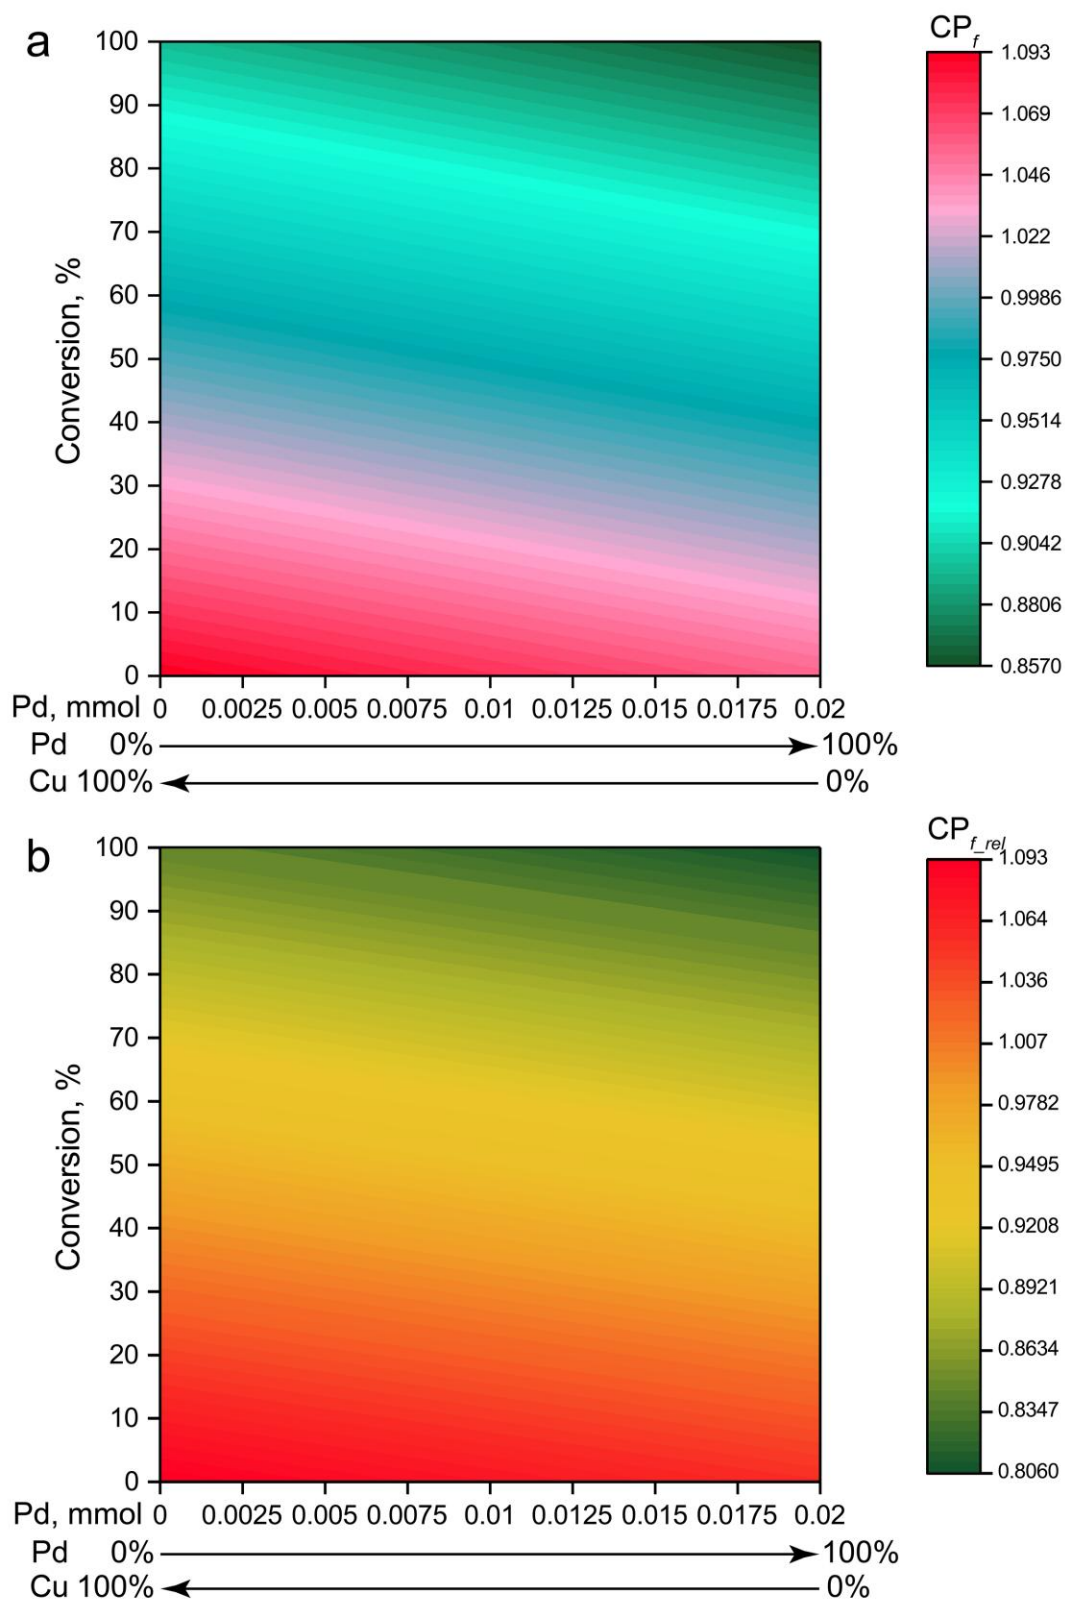

**Fig. S25.** Dependence of (a)  $CP_f$  and (b)  $CP_{f,rel}$  on the Pd : Cu ratio during the reaction period by example of synthesis of diphenylacetylene from phenylacetylene and bromobenzene using  $Pd(OAc)_2$  and  $CuI$  as catalysts and  $Et_3N$  as a base in DMF as measured in FRSN cells. The color legend is provided to the right. The data used in the plots are given in Table S14.

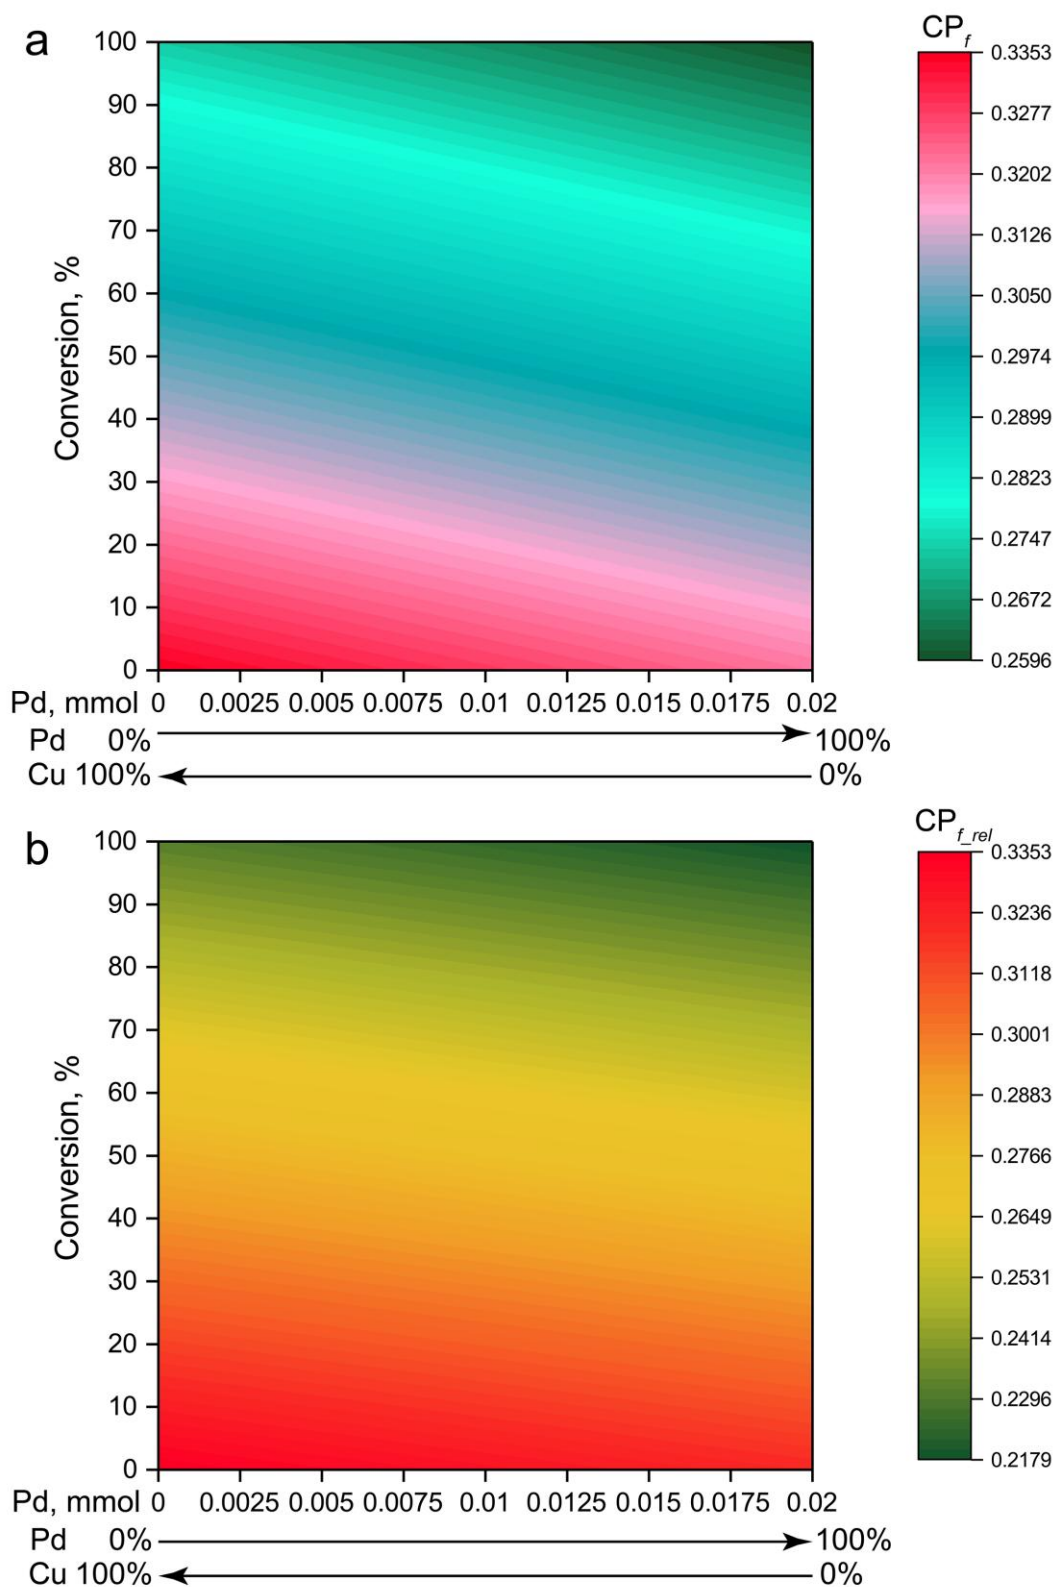

**Fig. S26.** Dependence of (a)  $CP_f$  and (b)  $CP_{f\_rel}$  on the Pd : Cu ratio during the reaction period by example of synthesis of diphenylacetylene from phenylacetylene and bromobenzene using  $Pd(OAc)_2$  and  $CuI$  as catalysts and  $Et_3N$  as a base in DMF as measured in HEK293T cells. The color legend is provided to the right. The data used in the plots are given in Table S15.

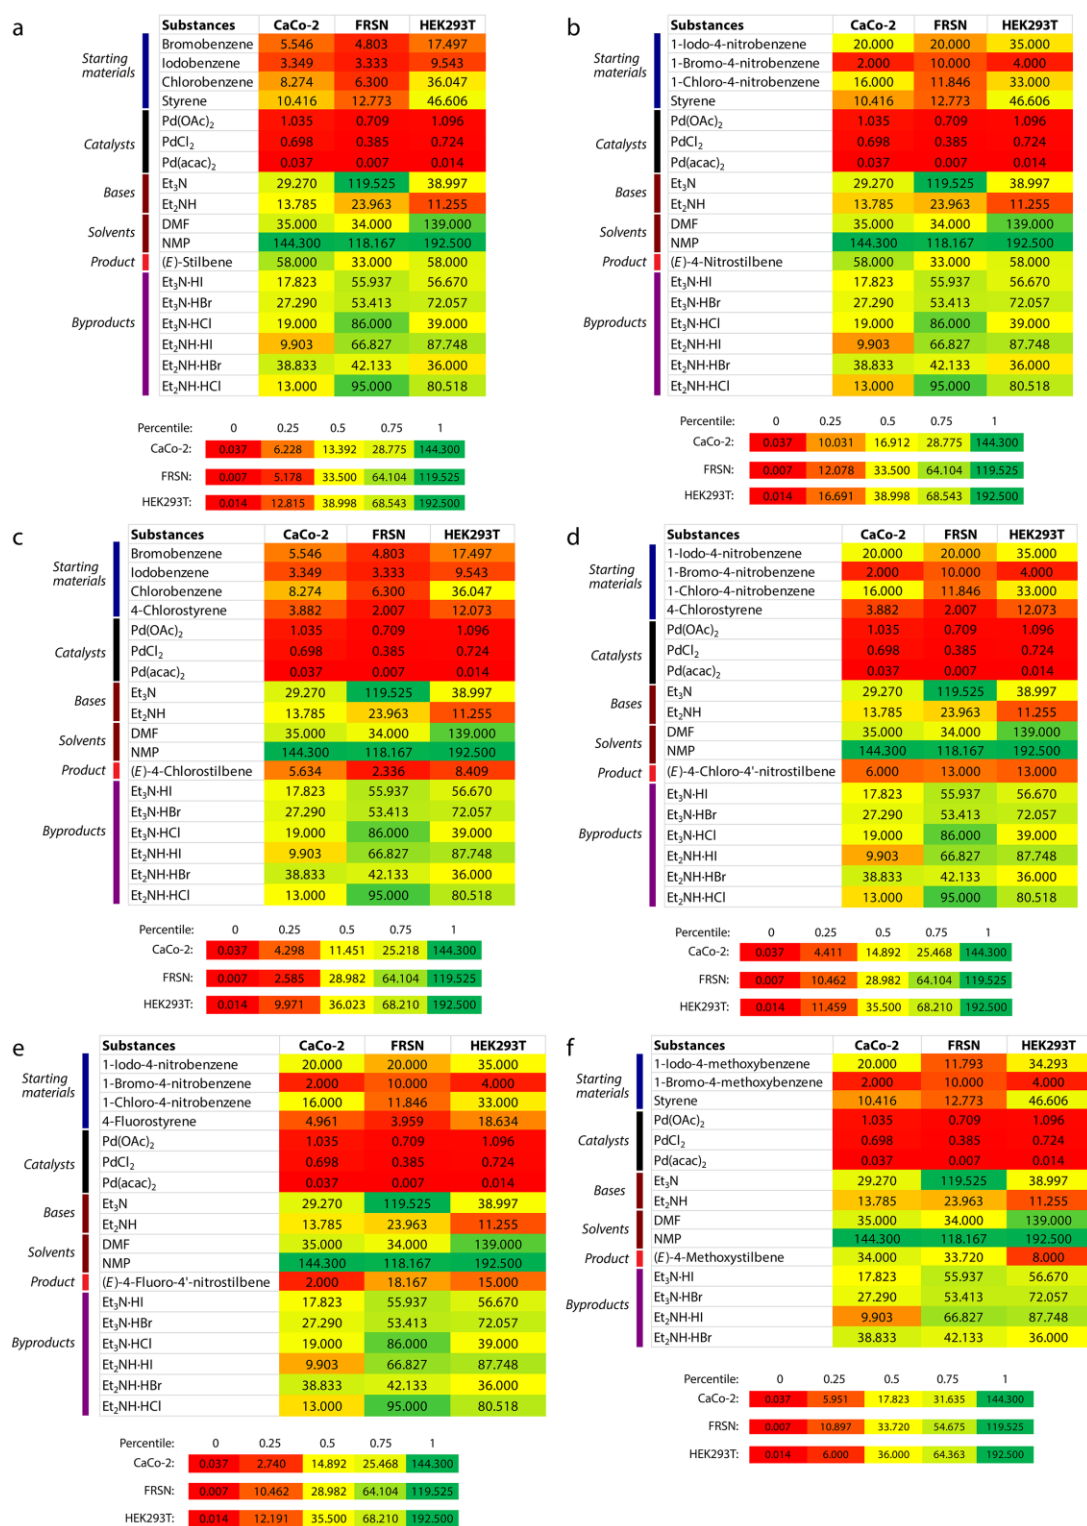

**Fig. S27.** Comparison of the cytotoxicity of the substances employed in the Mizoroki-Heck reactions in CaCo-2, HEK293T, and FRSN cell lines. The compounds involved in the synthesis of (a) (E)-stilbene, (b) (E)-4-nitrostilbene, (c) (E)-4-chlorostilbene, (d) (E)-4-chloro-4'-nitrostilbene, (e) (E)-4-fluoro-4'-nitrostilbene, and (f) (E)-4-methoxystilbene are shown. The colors of cells in the heatmaps reflect the 24-h CC<sub>50</sub> values of the corresponding substances in the corresponding cell line (see the legends below the heatmaps; the coloration is in accordance with the percentile distribution of the CC<sub>50</sub> values).
